# Supplementary material
Source: MDPI journal article supplement (https://www.mdpi.com/2304-6740/5/4/84)
Supplement: s1 [file s1]

Archive with 4 entries (3 files):
- inorganics-244705-supplementary/
- inorganics-244705-supplementary/Checkcif report.pdf
- inorganics-244705-supplementary/CIF.cif
- inorganics-244705-supplementary/inorganics-244705-supplementary.pdf
