# Supplementary material
Source: MDPI journal article supplement (https://www.mdpi.com/2304-6740/5/4/84)
Supplement: s1 [file s1 › inorganics-244705-supplementary/Checkcif report.pdf]

# checkCIF (basic structural check) running

Checking for embedded fcf data in CIF ...

Found embedded fcf data in CIF. Extracting fcf data from uploaded CIF, please wait .....

## checkCIF/PLATON (basic structural check)

Structure factors have been supplied for datablock(s) Pd4Si3CNtBu4

THIS REPORT IS FOR GUIDANCE ONLY. IF USED AS PART OF A REVIEW PROCEDURE FOR PUBLICATION, IT SHOULD NOT REPLACE THE EXPERTISE OF AN EXPERIENCED CRYSTALLOGRAPHIC REFEREE.

No syntax errors found.

Please wait while processing ....

[CIF dictionary](#)

[Interpreting this report](#)

[Structure factor report](#)

### Datablock: Pd4Si3CNtBu4

|                 |                                                |                    |
|-----------------|------------------------------------------------|--------------------|
| Bond precision: | C-C = 0.0075 Å                                 | Wavelength=0.71075 |
| Cell:           | a=10.8179(6)    b=22.0783(12)    c=22.8654(12) |                    |
|                 | alpha=90    beta=92.1391(12)    gamma=90       |                    |
| Temperature:    | 193 K                                          |                    |

  

|                | Calculated                | Reported           |
|----------------|---------------------------|--------------------|
| Volume         | 5457.4(5)                 | 5457.4(5)          |
| Space group    | P 21/n                    | P 1 21/n 1         |
| Hall group     | -P 2yn                    | -P 2yn             |
| Moiety formula | 2(C38 H78 N4 Pd4 Si3), C7 | C38 H78 N4 Pd4 Si3 |
| Sum formula    | C83 H156 N8 Pd8 Si6       | C38 H78 N4 Pd4 Si3 |
| Mr             | 2285.91                   | 1100.92            |
| Dx, g cm-3     | 1.391                     | 1.340              |
| Z              | 2                         | 4                  |
| Mu (mm-1)      | 1.391                     | 1.389              |
| F000           | 2324.0                    | 2240.0             |
| F000'          | 2309.46                   |                    |
| h,k,lmax       | 14,28,29                  | 14,28,29           |
| Nref           | 12544                     | 12489              |
| Tmin,Tmax      | 0.846,0.895               | 0.784,0.895        |
| Tmin'          | 0.812                     |                    |

Correction method= # Reported T Limits: Tmin=0.784  
Tmax=0.895 AbsCorr = MULTI-SCAN

Data completeness= 0.996    Theta(max)= 27.520

R(reflections)= 0.0516( 11907)    wR2(reflections)= 0.1518( 12489)

S = 1.101    Npar= 470

The following ALERTS were generated. Each ALERT has the format

**test-name ALERT alert-type alert-level.**

Click on the hyperlinks for more details of the test.

#### Alert level B

|                                   |                                                  |       |       |
|-----------------------------------|--------------------------------------------------|-------|-------|
| <a href="#">PLAT043_ALERT_1_B</a> | Calculated and Reported Mol. Weight Differ by .. | 84.07 | Check |
| <a href="#">PLAT910_ALERT_3_B</a> | Missing # of FCF Reflection(s) Below Theta(Min). | 18    | Note  |
| <a href="#">PLAT934_ALERT_3_B</a> | Number of (Iobs-Icalc)/SigmaW > 10 Outliers .... | 5     | Check |
| <a href="#">PLAT973_ALERT_2_B</a> | Check Calcd Positive Residual Density on Pd4     | 1.90  | eA-3  |
| <a href="#">PLAT973_ALERT_2_B</a> | Check Calcd Positive Residual Density on Pd3     | 1.89  | eA-3  |

#### Alert level C

[CHEMW03\\_ALERT\\_2\\_C](#) The ratio of given/expected molecular weight as calculated from the \_atom\_site\* data lies outside the range 0.99 <> 1.01  
 From the CIF: \_cell\_formula\_units\_Z 4  
 From the CIF: \_chemical\_formula\_weight 1100.92  
 TEST: Calculate formula weight from \_atom\_site\_\*

| atom | mass   | num   | sum    |
|------|--------|-------|--------|
| C    | 12.01  | 41.50 | 498.46 |
| H    | 1.01   | 78.00 | 78.62  |
| N    | 14.01  | 4.00  | 56.03  |
| Pd   | 106.42 | 4.00  | 425.68 |
| Si   | 28.09  | 3.00  | 84.26  |

Calculated formula weight 1143.05

[PLAT041\\_ALERT\\_1\\_C](#) Calc. and Reported SumFormula Strings Differ Please Check  
[PLAT068\\_ALERT\\_1\\_C](#) Reported F000 Differs from Calcd (or Missing)... Please Check  
[PLAT094\\_ALERT\\_2\\_C](#) Ratio of Maximum / Minimum Residual Density .... 2.84 Report  
[PLAT242\\_ALERT\\_2\\_C](#) Low 'MainMol' Ueq as Compared to Neighbors of C7 Check  
[PLAT242\\_ALERT\\_2\\_C](#) Low 'MainMol' Ueq as Compared to Neighbors of C17 Check  
[PLAT906\\_ALERT\\_3\\_C](#) Large K value in the Analysis of Variance ..... 2.984 Check  
[PLAT911\\_ALERT\\_3\\_C](#) Missing # FCF Refl Between THmin & STh/L= 0.600 6 Report  
[PLAT918\\_ALERT\\_3\\_C](#) Reflection(s) with I(obs) much Smaller I(calc) . 6 Check  
[PLAT971\\_ALERT\\_2\\_C](#) Check Calcd Residual Density 0.67A From C40 2.36 eA-3

**And 7 other PLAT971 Alerts**

[PLAT971\\_ALERT\\_2\\_C](#) Check Calcd Residual Density 0.82A From C42 2.10 eA-3  
[PLAT971\\_ALERT\\_2\\_C](#) Check Calcd Residual Density 0.82A From C44 2.10 eA-3  
[PLAT971\\_ALERT\\_2\\_C](#) Check Calcd Residual Density 0.62A From C40 2.06 eA-3  
[PLAT971\\_ALERT\\_2\\_C](#) Check Calcd Residual Density 0.48A From C44 1.83 eA-3  
[PLAT971\\_ALERT\\_2\\_C](#) Check Calcd Residual Density 0.85A From C42 1.77 eA-3  
[PLAT971\\_ALERT\\_2\\_C](#) Check Calcd Residual Density 0.79A From C45 1.63 eA-3  
[PLAT971\\_ALERT\\_2\\_C](#) Check Calcd Residual Density 0.76A From C45 1.56 eA-3

[PLAT973\\_ALERT\\_2\\_C](#) Check Calcd Positive Residual Density on Pd1 1.41 eA-3  
[PLAT973\\_ALERT\\_2\\_C](#) Check Calcd Positive Residual Density on Pd2 1.32 eA-3

### ● Alert level G

[FORMU01\\_ALERT\\_2\\_G](#) There is a discrepancy between the atom counts in the \_chemical\_formula\_sum and the formula from the \_atom\_site\* data.  
 Atom count from \_chemical\_formula\_sum: C38 H78 N4 Pd4 Si3  
 Atom count from the \_atom\_site data: C41.5 H78 N4 Pd4 Si3

[CELLZ01\\_ALERT\\_1\\_G](#) Difference between formula and atom\_site contents detected.  
[CELLZ01\\_ALERT\\_1\\_G](#) ALERT: Large difference may be due to a symmetry error - see SYMMG tests  
 From the CIF: \_cell\_formula\_units\_Z 4  
 From the CIF: \_chemical\_formula\_sum C38 H78 N4 Pd4 Si3  
 TEST: Compare cell contents of formula and atom\_site data

| atom | Z*formula | cif sites | diff   |
|------|-----------|-----------|--------|
| C    | 152.00    | 166.00    | -14.00 |
| H    | 312.00    | 312.00    | 0.00   |
| N    | 16.00     | 16.00     | 0.00   |
| Pd   | 16.00     | 16.00     | 0.00   |
| Si   | 12.00     | 12.00     | 0.00   |

[CHEMS02\\_ALERT\\_1\\_G](#) Please check that you have entered the correct \_publ\_requested\_category classification of your compound;  
 FI or CI or EI for inorganic; FM or CM or EM for metal-organic;  
 FO or CO or EO for organic.  
 From the CIF: \_publ\_requested\_category CHOOSE FI FM FO CI CM CO or  
 From the CIF: \_chemical\_formula\_sum: C38 H78 N4 Pd4 Si3

[PLAT042\\_ALERT\\_1\\_G](#) Calc. and Reported MoietyFormula Strings Differ Please Check  
[PLAT045\\_ALERT\\_1\\_G](#) Calculated and Reported Z Differ by a Factor ... 0.50 Check  
[PLAT083\\_ALERT\\_2\\_G](#) SHELXL Second Parameter in WGHT Unusually Large 13.00 Why ?  
[PLAT232\\_ALERT\\_2\\_G](#) Hirshfeld Test Diff (M-X) Pd2 -- Si1 .. 5.2 s.u.  
[PLAT300\\_ALERT\\_4\\_G](#) Atom Site Occupancy of C39 is Constrained at 0.5 Check

**And 6 other PLAT300 Alerts**

[PLAT300\\_ALERT\\_4\\_G](#) Atom Site Occupancy of C40 is Constrained at 0.5 Check  
[PLAT300\\_ALERT\\_4\\_G](#) Atom Site Occupancy of C41 is Constrained at 0.5 Check  
[PLAT300\\_ALERT\\_4\\_G](#) Atom Site Occupancy of C42 is Constrained at 0.5 Check  
[PLAT300\\_ALERT\\_4\\_G](#) Atom Site Occupancy of C43 is Constrained at 0.5 Check  
[PLAT300\\_ALERT\\_4\\_G](#) Atom Site Occupancy of C44 is Constrained at 0.5 Check  
[PLAT300\\_ALERT\\_4\\_G](#) Atom Site Occupancy of C45 is Constrained at 0.5 Check

[PLAT302\\_ALERT\\_4\\_G](#) Anion/Solvent/Minor-Residue Disorder (Resd 2).. 100% Note  
[PLAT304\\_ALERT\\_4\\_G](#) Non-Integer Number of Atoms ( 3.50) in Resd. # 2 Check  
[PLAT882\\_ALERT\\_1\\_G](#) Missing datum for \_diffrn\_reflns\_av\_unetI/netI . Please Check  
[PLAT912\\_ALERT\\_4\\_G](#) Missing # of FCF Reflections Above STh/L= 0.600 31 Note  
[PLAT913\\_ALERT\\_3\\_G](#) Missing # of Very Strong Reflections in FCF .... 1 Note

[PLAT978\\_ALERT\\_2\\_G](#) Number C-C Bonds with Positive Residual Density.

2 Info

---

0 **ALERT level A** = Most likely a serious problem - resolve or explain  
5 **ALERT level B** = A potentially serious problem, consider carefully  
19 **ALERT level C** = Check. Ensure it is not caused by an omission or oversight  
21 **ALERT level G** = General information/check it is not something unexpected

9 ALERT type 1 CIF construction/syntax error, inconsistent or missing data  
20 ALERT type 2 Indicator that the structure model may be wrong or deficient  
6 ALERT type 3 Indicator that the structure quality may be low  
10 ALERT type 4 Improvement, methodology, query or suggestion  
0 ALERT type 5 Informative message, check

---

It is advisable to attempt to resolve as many as possible of the alerts in all categories. Often the minor alerts point to easily fixed oversights, errors and omissions in your CIF or refinement strategy, so attention to these fine details can be worthwhile. In order to resolve some of the more serious problems it may be necessary to carry out additional measurements or structure refinements. However, the purpose of your study may justify the reported deviations and the more serious of these should normally be commented upon in the discussion or experimental section of a paper or in the "special\_details" fields of the CIF. checkCIF was carefully designed to identify outliers and unusual parameters, but every test has its limitations and alerts that are not important in a particular case may appear. Conversely, the absence of alerts does not guarantee there are no aspects of the results needing attention. It is up to the individual to critically assess their own results and, if necessary, seek expert advice.

### Publication of your CIF in IUCr journals

A basic structural check has been run on your CIF. These basic checks will be run on all CIFs submitted for publication in IUCr journals (*Acta Crystallographica*, *Journal of Applied Crystallography*, *Journal of Synchrotron Radiation*); however, if you intend to submit to *Acta Crystallographica Section C* or *E* or *IUCrData*, you should make sure that [full publication checks](#) are run on the final version of your CIF prior to submission.

### Publication of your CIF in other journals

Please refer to the *Notes for Authors* of the relevant journal for any special instructions relating to CIF submission.

---

PLATON version of 13/08/2017; check.def file version of 27/07/2017

### Datablock Pd4Si3CNtBu4 - ellipsoid plot

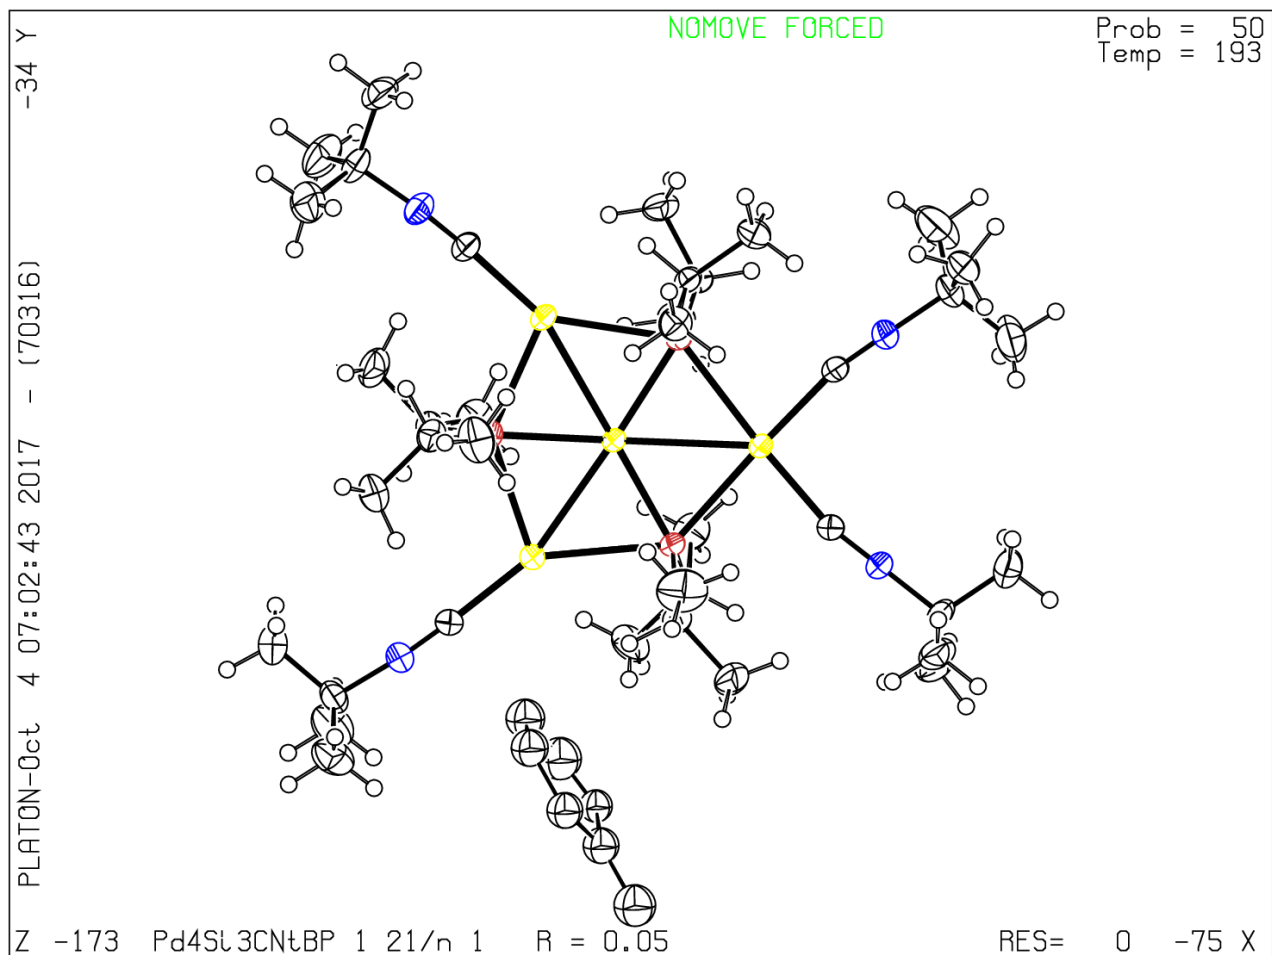

[Download CIF editor \(publCIF\) from the IUCr](#)  
[Download CIF editor \(enCIFer\) from the CCDC](#)  
[Test a new CIF entry](#)

# checkCIF (basic structural check) running

Checking for embedded fcf data in CIF ...

Found embedded fcf data in CIF. Extracting fcf data from uploaded CIF, please wait ....

## checkCIF/PLATON (basic structural check)

Structure factors have been supplied for datablock(s) Pd4Si3NHCIr3

THIS REPORT IS FOR GUIDANCE ONLY. IF USED AS PART OF A REVIEW PROCEDURE FOR PUBLICATION, IT SHOULD NOT REPLACE THE EXPERTISE OF AN EXPERIENCED CRYSTALLOGRAPHIC REFEREE.

No syntax errors found.

Please wait while processing ....

[CIF dictionary](#)

[Interpreting this report](#)

[Structure factor report](#)

### Datablock: Pd4Si3NHCIr3

|                 |                                                        |                    |
|-----------------|--------------------------------------------------------|--------------------|
| Bond precision: | C-C = 0.0068 Å                                         | Wavelength=0.71075 |
| Cell:           | a=14.505(3)    b=15.339(4)    c=15.655(4)              |                    |
|                 | alpha=89.593(12)    beta=63.724(6)    gamma=81.301(11) |                    |
| Temperature:    | 193 K                                                  |                    |

  

|                | Calculated          | Reported            |
|----------------|---------------------|---------------------|
| Volume         | 3080.2(13)          | 3080.2(13)          |
| Space group    | P -1                | P -1                |
| Hall group     | -P 1                | -P 1                |
| Moiety formula | C51 H100 N6 Pd4 Si3 | C51 H100 N6 Pd4 Si3 |
| Sum formula    | C51 H100 N6 Pd4 Si3 | C51 H100 N6 Pd4 Si3 |
| Mr             | 1307.25             | 1307.25             |
| Dx, g cm-3     | 1.410               | 1.409               |
| Z              | 2                   | 2                   |
| Mu (mm-1)      | 1.243               | 1.243               |
| F000           | 1348.0              | 1348.0              |
| F000'          | 1340.77             |                     |
| h,k,lmax       | 18,19,20            | 18,19,20            |
| Nref           | 14145               | 14053               |
| Tmin,Tmax      | 0.928,0.940         | 0.863,0.940         |
| Tmin'          | 0.883               |                     |

Correction method= # Reported T Limits: Tmin=0.863  
Tmax=0.940 AbsCorr = MULTI-SCAN

Data completeness= 0.993    Theta(max)= 27.495

R(reflections)= 0.0439( 11359)    wR2(reflections)= 0.1016( 14053)

S = 1.076    Npar= 577

The following ALERTS were generated. Each ALERT has the format

**test-name ALERT alert-type alert-level.**

Click on the hyperlinks for more details of the test.

#### Alert level B

|                                   |                                                  |                |           |
|-----------------------------------|--------------------------------------------------|----------------|-----------|
| <a href="#">PLAT412_ALERT_2_B</a> | Short Intra XH3 .. XHn                           | H5B .. H10C .. | 1.79 Ang. |
| <a href="#">PLAT412_ALERT_2_B</a> | Short Intra XH3 .. XHn                           | H8A .. H11C .. | 1.77 Ang. |
| <a href="#">PLAT910_ALERT_3_B</a> | Missing # of FCF Reflection(s) Below Theta(Min). |                | 22 Note   |

#### Alert level C

|                                   |                         |                 |           |
|-----------------------------------|-------------------------|-----------------|-----------|
| <a href="#">PLAT230_ALERT_2_C</a> | Hirshfeld Test Diff for | C46 -- C48 ..   | 5.2 s.u.  |
| <a href="#">PLAT412_ALERT_2_C</a> | Short Intra XH3 .. XHn  | H16B .. H21C .. | 1.89 Ang. |

[PLAT412\\_ALERT\\_2\\_C](#) Short Intra XH3 .. XHn H31B .. H33C .. 1.82 Ang.  
[PLAT906\\_ALERT\\_3\\_C](#) Large K value in the Analysis of Variance ..... 5.205 Check  
[PLAT911\\_ALERT\\_3\\_C](#) Missing # FCF Refl Between THmin & STh/L= 0.600 20 Report  
[PLAT977\\_ALERT\\_2\\_C](#) Check the Negative Difference Density on H10B -0.32 eA-3  
**And 10 other PLAT977 Alerts**  
  
[PLAT977\\_ALERT\\_2\\_C](#) Check the Negative Difference Density on H11A -0.33 eA-3  
[PLAT977\\_ALERT\\_2\\_C](#) Check the Negative Difference Density on H11B -0.53 eA-3  
[PLAT977\\_ALERT\\_2\\_C](#) Check the Negative Difference Density on H11C -0.38 eA-3  
[PLAT977\\_ALERT\\_2\\_C](#) Check the Negative Difference Density on H21A -0.48 eA-3  
[PLAT977\\_ALERT\\_2\\_C](#) Check the Negative Difference Density on H21B -0.32 eA-3  
[PLAT977\\_ALERT\\_2\\_C](#) Check the Negative Difference Density on H21C -0.38 eA-3  
[PLAT977\\_ALERT\\_2\\_C](#) Check the Negative Difference Density on H22A -0.36 eA-3  
[PLAT977\\_ALERT\\_2\\_C](#) Check the Negative Difference Density on H32B -0.36 eA-3  
[PLAT977\\_ALERT\\_2\\_C](#) Check the Negative Difference Density on H32C -0.43 eA-3  
[PLAT977\\_ALERT\\_2\\_C](#) Check the Negative Difference Density on H33B -0.33 eA-3  
  
[PLAT978\\_ALERT\\_2\\_C](#) Number C-C Bonds with Positive Residual Density. 0 Info

---

### Alert level G

[CHEMS02\\_ALERT\\_1\\_G](#) Please check that you have entered the correct  
 \_publ\_requested\_category classification of your compound;  
 FI or CI or EI for inorganic; FM or CM or EM for metal-organic;  
 FO or CO or EO for organic.  
 From the CIF: \_publ\_requested\_category CHOOSE FI FM FO CI CM CO or  
 From the CIF: \_chemical\_formula\_sum:C51 H100 N6 Pd4 Si3  
[PLAT232\\_ALERT\\_2\\_G](#) Hirshfeld Test Diff (M-X) Pd1 -- Si1 .. 7.4 s.u.  
**And 3 other PLAT232 Alerts**  
  
[PLAT232\\_ALERT\\_2\\_G](#) Hirshfeld Test Diff (M-X) Pd1 -- Si3 .. 5.5 s.u.  
[PLAT232\\_ALERT\\_2\\_G](#) Hirshfeld Test Diff (M-X) Pd2 -- Si1 .. 6.6 s.u.  
[PLAT232\\_ALERT\\_2\\_G](#) Hirshfeld Test Diff (M-X) Pd3 -- Si2 .. 8.2 s.u.  
  
[PLAT343\\_ALERT\\_2\\_G](#) Unusual sp? Angle Range in Main Residue for C46 Check  
[PLAT343\\_ALERT\\_2\\_G](#) Unusual sp? Angle Range in Main Residue for C49 Check  
[PLAT367\\_ALERT\\_2\\_G](#) Long? C(sp?)-C(sp?) Bond C46 - C47 .. 1.52 Ang.  
**And 3 other PLAT367 Alerts**  
  
[PLAT367\\_ALERT\\_2\\_G](#) Long? C(sp?)-C(sp?) Bond C46 - C48 .. 1.54 Ang.  
[PLAT367\\_ALERT\\_2\\_G](#) Long? C(sp?)-C(sp?) Bond C49 - C50 .. 1.53 Ang.  
[PLAT367\\_ALERT\\_2\\_G](#) Long? C(sp?)-C(sp?) Bond C49 - C51 .. 1.52 Ang.  
  
[PLAT380\\_ALERT\\_4\\_G](#) Incorrectly? Oriented X(sp2)-Methyl Moiety ..... C32 Check  
[PLAT882\\_ALERT\\_1\\_G](#) Missing datum for \_diffrn\_reflns\_av\_unetI/netI . Please Check  
[PLAT912\\_ALERT\\_4\\_G](#) Missing # of FCF Reflections Above STh/L= 0.600 51 Note  
[PLAT913\\_ALERT\\_3\\_G](#) Missing # of Very Strong Reflections in FCF .... 2 Note

---

0 **ALERT level A** = Most likely a serious problem - resolve or explain  
 3 **ALERT level B** = A potentially serious problem, consider carefully  
 17 **ALERT level C** = Check. Ensure it is not caused by an omission or oversight  
 15 **ALERT level G** = General information/check it is not something unexpected

2 ALERT type 1 CIF construction/syntax error, inconsistent or missing data  
 27 ALERT type 2 Indicator that the structure model may be wrong or deficient  
 4 ALERT type 3 Indicator that the structure quality may be low  
 2 ALERT type 4 Improvement, methodology, query or suggestion  
 0 ALERT type 5 Informative message, check

---

It is advisable to attempt to resolve as many as possible of the alerts in all categories. Often the minor alerts point to easily fixed oversights, errors and omissions in your CIF or refinement strategy, so attention to these fine details can be worthwhile. In order to resolve some of the more serious problems it may be necessary to carry out additional measurements or structure refinements. However, the purpose of your study may justify the reported deviations and the more serious of these should normally be commented upon in the discussion or experimental section of a paper or in the "special\_details" fields of the CIF. checkCIF was carefully designed to identify outliers and unusual parameters, but every test has its limitations and alerts that are not important in a particular case may appear. Conversely, the absence of alerts does not guarantee there are no aspects of the results needing attention. It is up to the individual to critically assess their own results and, if necessary, seek expert advice.

### Publication of your CIF in IUCr journals

A basic structural check has been run on your CIF. These basic checks will be run on all CIFs submitted for publication in IUCr journals (*Acta Crystallographica*, *Journal of Applied Crystallography*, *Journal of Synchrotron Radiation*); however, if you intend to submit to *Acta Crystallographica Section C* or *E* or *IUCrData*, you should make sure that [full publication checks](#) are run on the final version of your CIF prior to submission.

### Publication of your CIF in other journals

Please refer to the *Notes for Authors* of the relevant journal for any special instructions relating to CIF submission.

---

PLATON version of 13/08/2017; check.def file version of 27/07/2017

### Datablock Pd4Si3NHClPr3 - ellipsoid plot

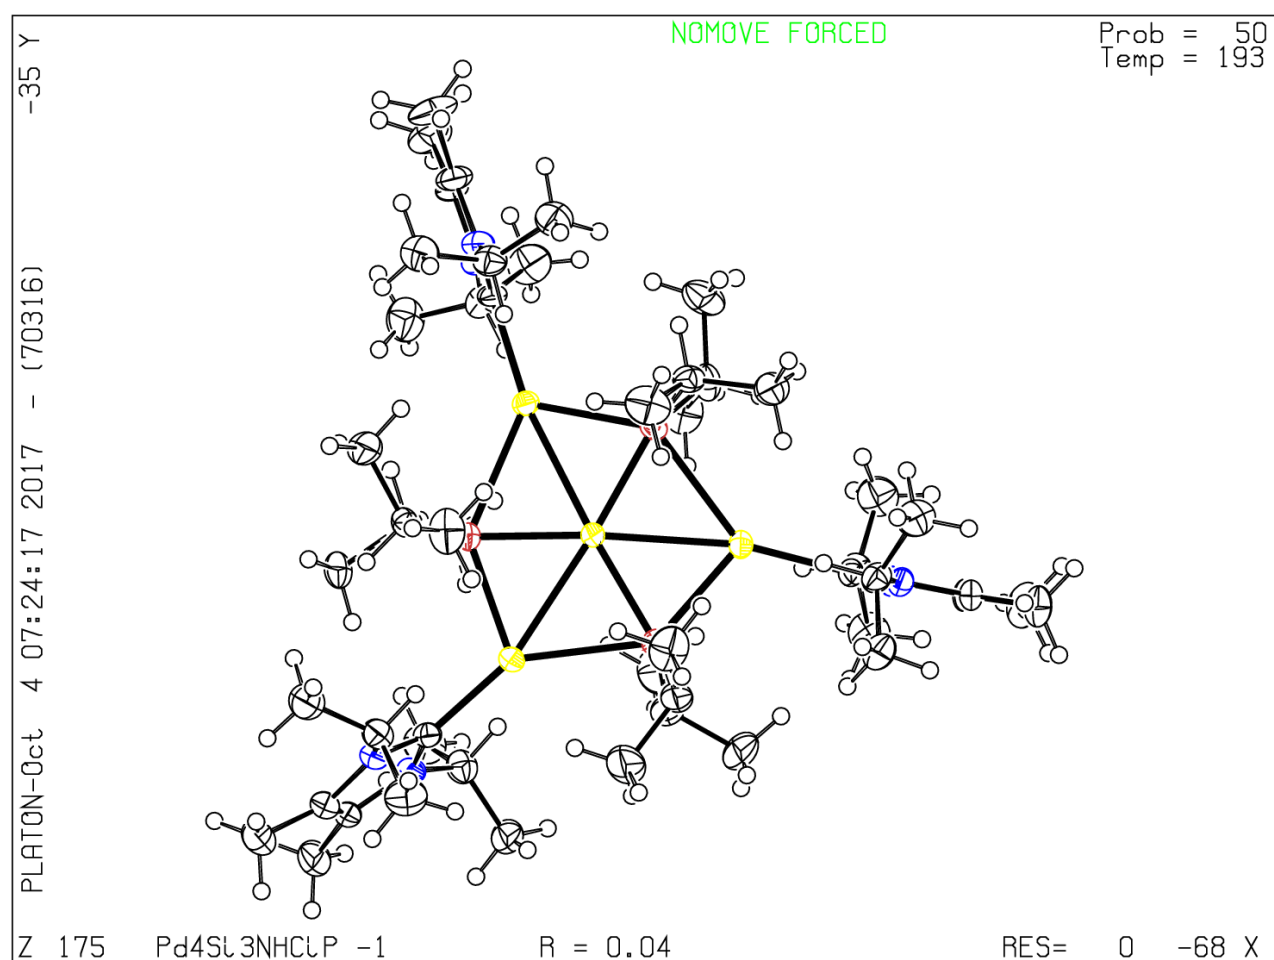

---

[Download CIF editor \(publCIF\) from the IUCr](#)  
[Download CIF editor \(enCIFer\) from the CCDC](#)  
[Test a new CIF entry](#)

# checkCIF (basic structural check) running

Checking for embedded fcf data in CIF ...

Found embedded fcf data in CIF. Extracting fcf data from uploaded CIF, please wait ....

## checkCIF/PLATON (basic structural check)

Structure factors have been supplied for datablock(s) Pd4Si3POR3

THIS REPORT IS FOR GUIDANCE ONLY. IF USED AS PART OF A REVIEW PROCEDURE FOR PUBLICATION, IT SHOULD NOT REPLACE THE EXPERTISE OF AN EXPERIENCED CRYSTALLOGRAPHIC REFEREE.

No syntax errors found.

Please wait while processing ....

[CIF dictionary](#)

[Interpreting this report](#)

[Structure factor report](#)

### Datablock: Pd4Si3POR3

|                 |                                                      |                    |
|-----------------|------------------------------------------------------|--------------------|
| Bond precision: | C-C = 0.0059 Å                                       | Wavelength=0.71075 |
| Cell:           | a=11.2891(18)    b=12.711(2)    c=19.549(3)          |                    |
|                 | alpha=81.516(6)    beta=85.854(6)    gamma=64.096(5) |                    |
| Temperature:    | 103 K                                                |                    |

  

|                | Calculated                   | Reported              |
|----------------|------------------------------|-----------------------|
| Volume         | 2495.6(7)                    | 2495.6(7)             |
| Space group    | P -1                         | P -1                  |
| Hall group     | -P 1                         | -P 1                  |
| Moiety formula | 2(C36 H75 O9 P3 Pd3 Si3), C5 | C36 H75 O9 P3 Pd3 Si3 |
| Sum formula    | C77 H150 O18 P6 Pd6 Si6      | C36 H75 O9 P3 Pd3 Si3 |
| Mr             | 2356.74                      | 1148.36               |
| Dx, g cm-3     | 1.568                        | 1.528                 |
| Z              | 1                            | 2                     |
| Mu (mm-1)      | 1.284                        | 0.000                 |
| F000           | 1206.0                       | 1176.0                |
| F000'          | 1201.48                      |                       |
| h,k,lmax       | 14,16,25                     | 14,16,25              |
| Nref           | 11479                        | 11457                 |
| Tmin,Tmax      |                              | 0.834,1.000           |
| Tmin'          |                              |                       |

Correction method= # Reported T Limits: Tmin=0.834  
Tmax=1.000 AbsCorr = MULTI-SCAN

Data completeness= 0.998    Theta(max)= 27.485

R(reflections)= 0.0370( 9364)    wR2(reflections)= 0.0830( 11457)

S = 1.023    Npar= 507

The following ALERTS were generated. Each ALERT has the format

**test-name ALERT alert-type alert-level.**

Click on the hyperlinks for more details of the test.

#### Alert level B

[PLAT043\\_ALERT\\_1\\_B](#) Calculated and Reported Mol. Weight Differ by .. 60.02 Check  
[PLAT910\\_ALERT\\_3\\_B](#) Missing # of FCF Reflection(s) Below Theta(Min). 13 Note

#### Alert level C

[CHEMW03\\_ALERT\\_2\\_C](#) The ratio of given/expected molecular weight as  
calculated from the \_atom\_site\* data lies outside  
the range 0.99 <> 1.01

From the CIF: `_cell_formula_units_Z` 2  
 From the CIF: `_chemical_formula_weight` 1148.36  
 TEST: Calculate formula weight from `_atom_site_*`

| atom | mass   | num   | sum    |
|------|--------|-------|--------|
| C    | 12.01  | 38.50 | 462.42 |
| H    | 1.01   | 75.00 | 75.60  |
| O    | 16.00  | 9.00  | 143.99 |
| Pd   | 106.42 | 3.00  | 319.26 |
| Si   | 28.09  | 3.00  | 84.26  |
| P    | 30.97  | 3.00  | 92.92  |

Calculated formula weight 1178.45

|                                   |                                                  |              |
|-----------------------------------|--------------------------------------------------|--------------|
| <a href="#">PLAT041_ALERT_1_C</a> | Calc. and Reported SumFormula Strings Differ     | Please Check |
| <a href="#">PLAT094_ALERT_2_C</a> | Ratio of Maximum / Minimum Residual Density .... | 2.47 Report  |
| <a href="#">PLAT220_ALERT_2_C</a> | Non-Solvent Resd 1 C Ueq(max)/Ueq(min) Range     | 3.2 Ratio    |
| <a href="#">PLAT906_ALERT_3_C</a> | Large K value in the Analysis of Variance .....  | 3.516 Check  |
| <a href="#">PLAT911_ALERT_3_C</a> | Missing # FCF Refl Between THmin & STh/L= 0.600  | 9 Report     |
| <a href="#">PLAT971_ALERT_2_C</a> | Check Calcd Residual Density 0.44A From C37      | 2.02 eA-3    |
| <a href="#">PLAT971_ALERT_2_C</a> | Check Calcd Residual Density 0.47A From C37      | 1.77 eA-3    |
| <a href="#">PLAT977_ALERT_2_C</a> | Check the Negative Difference Density on H30C    | -0.34 eA-3   |

### Alert level G

[FORMU01\\_ALERT\\_2\\_G](#) There is a discrepancy between the atom counts in the `_chemical_formula_sum` and the formula from the `_atom_site*` data.

Atom count from `_chemical_formula_sum`: C36 H75 O9 P3 Pd3 Si3

Atom count from the `_atom_site` data: C38.5 H75 O9 P3 Pd3 Si3

[CELLZ01\\_ALERT\\_1\\_G](#) Difference between formula and `_atom_site` contents detected.

[CELLZ01\\_ALERT\\_1\\_G](#) ALERT: Large difference may be due to a

symmetry error - see SYMMG tests

From the CIF: `_cell_formula_units_Z` 2

From the CIF: `_chemical_formula_sum` C36 H75 O9 P3 Pd3 Si3

TEST: Compare cell contents of formula and `_atom_site` data

| atom | Z*formula | cif sites | diff  |
|------|-----------|-----------|-------|
| C    | 72.00     | 77.00     | -5.00 |
| H    | 150.00    | 150.00    | 0.00  |
| O    | 18.00     | 18.00     | 0.00  |
| P    | 6.00      | 6.00      | 0.00  |
| Pd   | 6.00      | 6.00      | 0.00  |
| Si   | 6.00      | 6.00      | 0.00  |

[CHEMS02\\_ALERT\\_1\\_G](#) Please check that you have entered the correct `_publ_requested_category` classification of your compound;

FI or CI or EI for inorganic; FM or CM or EM for metal-organic;

FO or CO or EO for organic.

From the CIF: `_publ_requested_category` CHOOSE FI FM FO CI CM CO or

From the CIF: `_chemical_formula_sum`: C36 H75 O9 P3 Pd3 Si3

|                                   |                                                  |              |
|-----------------------------------|--------------------------------------------------|--------------|
| <a href="#">PLAT042_ALERT_1_G</a> | Calc. and Reported MoietyFormula Strings Differ  | Please Check |
| <a href="#">PLAT045_ALERT_1_G</a> | Calculated and Reported Z Differ by a Factor ... | 0.50 Check   |
| <a href="#">PLAT232_ALERT_2_G</a> | Hirshfeld Test Diff (M-X) Pd1 -- P1 ..           | 8.8 s.u.     |

### And 8 other PLAT232 Alerts

|                                   |                                         |           |
|-----------------------------------|-----------------------------------------|-----------|
| <a href="#">PLAT232_ALERT_2_G</a> | Hirshfeld Test Diff (M-X) Pd1 -- Si1 .. | 8.2 s.u.  |
| <a href="#">PLAT232_ALERT_2_G</a> | Hirshfeld Test Diff (M-X) Pd1 -- Si3 .. | 6.6 s.u.  |
| <a href="#">PLAT232_ALERT_2_G</a> | Hirshfeld Test Diff (M-X) Pd2 -- P2 ..  | 7.6 s.u.  |
| <a href="#">PLAT232_ALERT_2_G</a> | Hirshfeld Test Diff (M-X) Pd2 -- Si1 .. | 8.2 s.u.  |
| <a href="#">PLAT232_ALERT_2_G</a> | Hirshfeld Test Diff (M-X) Pd2 -- Si2 .. | 10.0 s.u. |
| <a href="#">PLAT232_ALERT_2_G</a> | Hirshfeld Test Diff (M-X) Pd3 -- P3 ..  | 11.0 s.u. |
| <a href="#">PLAT232_ALERT_2_G</a> | Hirshfeld Test Diff (M-X) Pd3 -- Si2 .. | 8.6 s.u.  |
| <a href="#">PLAT232_ALERT_2_G</a> | Hirshfeld Test Diff (M-X) Pd3 -- Si3 .. | 7.4 s.u.  |

|                                   |                                              |           |
|-----------------------------------|----------------------------------------------|-----------|
| <a href="#">PLAT300_ALERT_4_G</a> | Atom Site Occupancy of C37 is Constrained at | 0.5 Check |
|-----------------------------------|----------------------------------------------|-----------|

### And 4 other PLAT300 Alerts

|                                   |                                              |           |
|-----------------------------------|----------------------------------------------|-----------|
| <a href="#">PLAT300_ALERT_4_G</a> | Atom Site Occupancy of C38 is Constrained at | 0.5 Check |
| <a href="#">PLAT300_ALERT_4_G</a> | Atom Site Occupancy of C39 is Constrained at | 0.5 Check |
| <a href="#">PLAT300_ALERT_4_G</a> | Atom Site Occupancy of C40 is Constrained at | 0.5 Check |
| <a href="#">PLAT300_ALERT_4_G</a> | Atom Site Occupancy of C41 is Constrained at | 0.5 Check |

|                                   |                                                 |           |
|-----------------------------------|-------------------------------------------------|-----------|
| <a href="#">PLAT302_ALERT_4_G</a> | Anion/Solvent/Minor-Residue Disorder (Resd 2).. | 100% Note |
|-----------------------------------|-------------------------------------------------|-----------|

|                                   |                                                |         |
|-----------------------------------|------------------------------------------------|---------|
| <a href="#">PLAT304_ALERT_4_G</a> | Non-Integer Number of Atoms ( 2.50) in Resd. # | 2 Check |
|-----------------------------------|------------------------------------------------|---------|

|                                   |                                           |              |
|-----------------------------------|-------------------------------------------|--------------|
| <a href="#">PLAT395_ALERT_2_G</a> | Deviating X-O-Y Angle from 120 Deg for O1 | 117.3 Degree |
|-----------------------------------|-------------------------------------------|--------------|

### And 8 other PLAT395 Alerts

|                                   |                                           |              |
|-----------------------------------|-------------------------------------------|--------------|
| <a href="#">PLAT395_ALERT_2_G</a> | Deviating X-O-Y Angle from 120 Deg for O2 | 117.0 Degree |
| <a href="#">PLAT395_ALERT_2_G</a> | Deviating X-O-Y Angle from 120 Deg for O3 | 115.3 Degree |
| <a href="#">PLAT395_ALERT_2_G</a> | Deviating X-O-Y Angle from 120 Deg for O4 | 117.1 Degree |
| <a href="#">PLAT395_ALERT_2_G</a> | Deviating X-O-Y Angle from 120 Deg for O5 | 116.5 Degree |
| <a href="#">PLAT395_ALERT_2_G</a> | Deviating X-O-Y Angle from 120 Deg for O6 | 116.7 Degree |
| <a href="#">PLAT395_ALERT_2_G</a> | Deviating X-O-Y Angle from 120 Deg for O7 | 116.5 Degree |

[PLAT395\\_ALERT\\_2\\_G](#) Deviating X-O-Y Angle from 120 Deg for O8 116.5 Degree  
[PLAT395\\_ALERT\\_2\\_G](#) Deviating X-O-Y Angle from 120 Deg for O9 115.8 Degree

[PLAT432\\_ALERT\\_2\\_G](#) Short Inter X...Y Contact C37 .. C41 .. 1.73 Ang.

**And 10 other PLAT432 Alerts**

[PLAT432\\_ALERT\\_2\\_G](#) Short Inter X...Y Contact C37 .. C40 .. 2.60 Ang.  
[PLAT432\\_ALERT\\_2\\_G](#) Short Inter X...Y Contact C38 .. C41 .. 2.31 Ang.  
[PLAT432\\_ALERT\\_2\\_G](#) Short Inter X...Y Contact C38 .. C39 .. 2.41 Ang.  
[PLAT432\\_ALERT\\_2\\_G](#) Short Inter X...Y Contact C38 .. C40 .. 2.51 Ang.  
[PLAT432\\_ALERT\\_2\\_G](#) Short Inter X...Y Contact C38 .. C38 .. 3.03 Ang.  
[PLAT432\\_ALERT\\_2\\_G](#) Short Inter X...Y Contact C39 .. C41 .. 1.31 Ang.  
[PLAT432\\_ALERT\\_2\\_G](#) Short Inter X...Y Contact C39 .. C40 .. 1.67 Ang.  
[PLAT432\\_ALERT\\_2\\_G](#) Short Inter X...Y Contact C39 .. C39 .. 2.12 Ang.  
[PLAT432\\_ALERT\\_2\\_G](#) Short Inter X...Y Contact C40 .. C40 .. 2.36 Ang.  
[PLAT432\\_ALERT\\_2\\_G](#) Short Inter X...Y Contact C40 .. C41 .. 2.62 Ang.

[PLAT710\\_ALERT\\_4\\_G](#) Delete 1-2-3 or 2-3-4 Linear Torsion Angle ... # 101 Do !  
 C40 -C38 -C39 -C41 99.00 8.00 1.555 1.555 1.555 2.577

[PLAT710\\_ALERT\\_4\\_G](#) Delete 1-2-3 or 2-3-4 Linear Torsion Angle ... # 102 Do !  
 C37 -C38 -C39 -C41 -84.00 8.00 1.555 1.555 1.555 2.577

[PLAT773\\_ALERT\\_2\\_G](#) Check long C-C Bond in CIF: C37 -- C41 . 1.73 Ang.

[PLAT773\\_ALERT\\_2\\_G](#) Check long C-C Bond in CIF: C41 -- C37 . 1.73 Ang.

[PLAT779\\_ALERT\\_4\\_G](#) Suspect or Irrelevant (Bond) Angle in CIF .... # 292 Check

C39 -C37 -C38 1.555 1.555 1.555 38.20 Deg.

[PLAT779\\_ALERT\\_4\\_G](#) Suspect or Irrelevant (Bond) Angle in CIF .... # 301 Check

C38 -C39 -C40 1.555 1.555 1.555 43.20 Deg.

[PLAT779\\_ALERT\\_4\\_G](#) Suspect or Irrelevant (Bond) Angle in CIF .... # 306 Check

C41 -C39 -C40 2.577 1.555 2.577 41.50 Deg.

[PLAT779\\_ALERT\\_4\\_G](#) Suspect or Irrelevant (Bond) Angle in CIF .... # 309 Check

C38 -C40 -C39 1.555 1.555 1.555 41.90 Deg.

[PLAT779\\_ALERT\\_4\\_G](#) Suspect or Irrelevant (Bond) Angle in CIF .... # 316 Check

C39 -C41 -C37 2.577 1.555 2.577 44.80 Deg.

[PLAT882\\_ALERT\\_1\\_G](#) Missing datum for \_diffrn\_reflns\_av\_unetI/netI . Please Check

[PLAT913\\_ALERT\\_3\\_G](#) Missing # of Very Strong Reflections in FCF .... 2 Note

[PLAT933\\_ALERT\\_2\\_G](#) Number of OMIT Records in Embedded .res File ... 22 Note

[PLAT978\\_ALERT\\_2\\_G](#) Number C-C Bonds with Positive Residual Density. 3 Info

[PLAT981\\_ALERT\\_1\\_G](#) No non-zero f" Anomalous Scattering Values Found Please Check

[PLAT986\\_ALERT\\_1\\_G](#) No non-zero f' Anomalous Scattering Values Found Please Check

- 0 **ALERT level A** = Most likely a serious problem - resolve or explain  
 2 **ALERT level B** = A potentially serious problem, consider carefully  
 9 **ALERT level C** = Check. Ensure it is not caused by an omission or oversight  
 57 **ALERT level G** = General information/check it is not something unexpected

- 10 ALERT type 1 CIF construction/syntax error, inconsistent or missing data  
 40 ALERT type 2 Indicator that the structure model may be wrong or deficient  
 4 ALERT type 3 Indicator that the structure quality may be low  
 14 ALERT type 4 Improvement, methodology, query or suggestion  
 0 ALERT type 5 Informative message, check

It is advisable to attempt to resolve as many as possible of the alerts in all categories. Often the minor alerts point to easily fixed oversights, errors and omissions in your CIF or refinement strategy, so attention to these fine details can be worthwhile. In order to resolve some of the more serious problems it may be necessary to carry out additional measurements or structure refinements. However, the purpose of your study may justify the reported deviations and the more serious of these should normally be commented upon in the discussion or experimental section of a paper or in the "special\_details" fields of the CIF. checkCIF was carefully designed to identify outliers and unusual parameters, but every test has its limitations and alerts that are not important in a particular case may appear. Conversely, the absence of alerts does not guarantee there are no aspects of the results needing attention. It is up to the individual to critically assess their own results and, if necessary, seek expert advice.

### Publication of your CIF in IUCr journals

A basic structural check has been run on your CIF. These basic checks will be run on all CIFs submitted for publication in IUCr journals (*Acta Crystallographica*, *Journal of Applied Crystallography*, *Journal of Synchrotron Radiation*); however, if you intend to submit to *Acta Crystallographica Section C* or *E* or *IUCrData*, you should make sure that [full publication checks](#) are run on the final version of your CIF prior to submission.

### Publication of your CIF in other journals

Please refer to the *Notes for Authors* of the relevant journal for any special instructions relating to CIF submission.

---

PLATON version of 13/08/2017; check.def file version of 27/07/2017

### Datablock Pd4Si3POR3 - ellipsoid plot

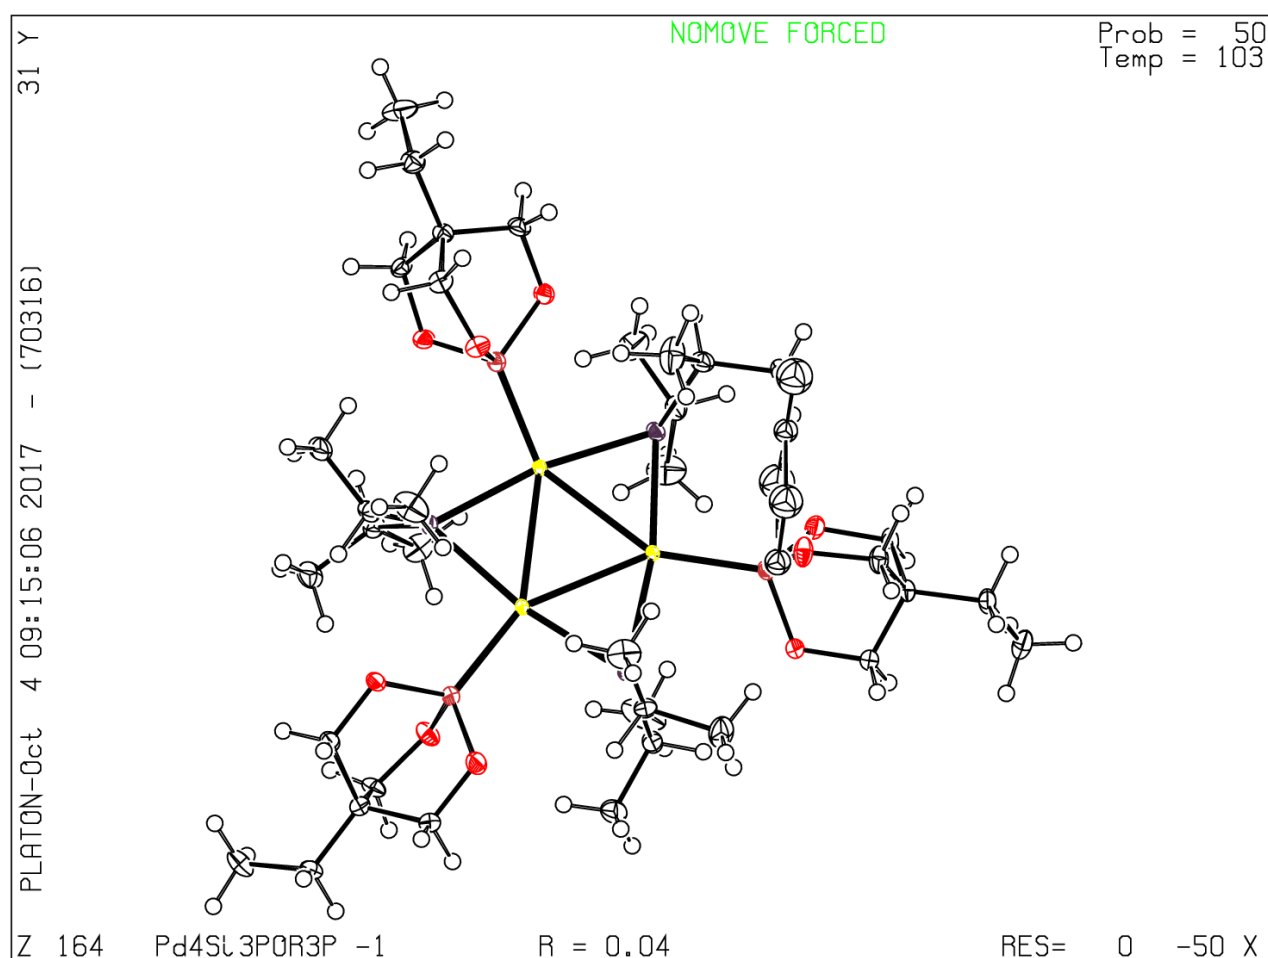

---

[Download CIF editor \(publCIF\) from the IUCr](#)  
[Download CIF editor \(enCIFer\) from the CCDC](#)  
[Test a new CIF entry](#)
