# Supplementary material
Source: MDPI journal article supplement (https://www.mdpi.com/2304-6740/5/4/84)
Supplement: s1 [file s1 › inorganics-244705-supplementary/CIF.cif]

data_global
_audit_creation_date                               2017-10-04
_audit_creation_method                            'by CrystalStructure 4.2.5'
_audit_update_record                               ?

#==============================================================================
# PROCESSING SUMMARY (IUCr Office Use Only)

_journal_date_recd_electronic                      ?
_journal_date_from_coeditor                        ?
_journal_date_accepted                             ?
_journal_coeditor_code                             ?

#==============================================================================
# SUBMISSION DETAILS

_publ_contact_author_name                         'ENTER NAME'
_publ_contact_author_email                        'ENTER EMAIL ADDRESS'
_publ_contact_author_fax                          'ENTER FAX NUMBER'
_publ_contact_author_phone                        'ENTER PHONE NUMBER'
_publ_contact_letter
;
    ENTER TEXT OF LETTER
;
_publ_requested_journal                           'ENTER JOURNAL NAME HERE'
_publ_requested_category
                                               'CHOOSE FI FM FO CI CM CO or AD'
_publ_requested_coeditor_name                      ?

#==============================================================================
# TITLE AND AUTHOR LIST

_publ_section_title
;
    ENTER SECTION TITLE
;
_publ_section_title_footnote
;
    ENTER FOOTNOTE TO TITLE OF PAPER
;
loop_
_publ_author_name
_publ_author_footnote
_publ_author_address
' FIRST AUTHORS NAME '
;
  FIRST AUTHORS FOOTNOTES
;
;
  FIRST AUTHORS ADDRESS
;
_publ_section_synopsis
;
    ENTER SYNOPSIS
;

#==============================================================================
# TEXT

_publ_section_abstract
;
    ENTER ABSTRACT
;
_publ_section_comment
;
    ENTER TEXT
;
_publ_section_references
;
    ENTER OTHER REFERENCES

    Rigaku (2017). CrystalStructure. Version 4.2.5. 
    Rigaku Corporation, Tokyo, Japan.

    Burla, M. C., Caliandro, R., Camalli, M., Carrozzini, B., 
    Cascarano, G. L., Giacovazzo, C., Mallamo, M., Mazzone, A., 
    Polidori, G. and Spagna, R. 
    (2012). J. Appl. Cryst. 45, 357-361.
    SIR2011

    Sheldrick, G.M. (1997). SHELXL97. University of Gottingen, Germany.

    Rigaku (1998). REQAB. 
    Rigaku Corporation, Tokyo, Japan.

;
_publ_section_figure_captions
;
    ENTER FIGURE CAPTIONS
;
_publ_section_exptl_prep
;
    ENTER COMPOUND PREPARATION DETAILS
;
_publ_section_exptl_refinement
;
    ENTER SPECIAL DETAILS OF THE REFINEMENT
;

#==============================================================================
data_Pd4Si3(CNtBu)4

#==============================================================================
# CHEMICAL DATA

_chemical_formula_sum                             'C38 H78 N4 Pd4 Si3'
_chemical_formula_moiety                          'C38 H78 N4 Pd4 Si3'
_chemical_formula_weight                           1100.92
_chemical_melting_point                            ?

#==============================================================================
# CRYSTAL DATA
_space_group_crystal_system                        monoclinic
_space_group_name_H-M_alt                         'P 1 21/n 1'
_space_group_name_Hall                            '-P 2yn'
_space_group_IT_number                             14
loop_
_space_group_symop_id
_space_group_symop_operation_xyz
1   '+X,+Y,+Z'
2   '1/2-X,1/2+Y,1/2-Z'
3   '-X,-Y,-Z'
4   '-1/2+X,-1/2-Y,-1/2+Z'
#------------------------------------------------------------------------------
_cell_length_a                                     10.8179(6)
_cell_length_b                                     22.0783(12)
_cell_length_c                                     22.8654(12)
_cell_angle_alpha                                  90.0000
_cell_angle_beta                                   92.1391(12)
_cell_angle_gamma                                  90.0000
_cell_volume                                       5457.4(5)
_cell_formula_units_Z                              4
_cell_measurement_reflns_used                      20078
_cell_measurement_theta_min                        2.25
_cell_measurement_theta_max                        30.43
_cell_measurement_temperature                      193
#------------------------------------------------------------------------------
_exptl_crystal_description                         block
_exptl_crystal_colour                              yellow
_exptl_crystal_size_max                            0.150
_exptl_crystal_size_mid                            0.100
_exptl_crystal_size_min                            0.080
_exptl_crystal_density_diffrn                      1.340
_exptl_crystal_density_meas                        ?
_exptl_crystal_density_method                     'not measured'
_exptl_crystal_F_000                               2240.00
_exptl_absorpt_coefficient_mu                      1.389
_exptl_absorpt_correction_type                     multi-scan
_exptl_absorpt_process_details                    'REQAB (Rigaku, 1998)'
_exptl_absorpt_correction_T_min                    0.784
_exptl_absorpt_correction_T_max                    0.895

#==============================================================================
# EXPERIMENTAL DATA

_diffrn_ambient_temperature                        193
_diffrn_radiation_type                            'Mo K\a'
_diffrn_radiation_wavelength                       0.71075
_diffrn_measurement_device_type                   'Rigaku Saturn724'
_diffrn_measurement_method                         \w
_diffrn_detector_area_resol_mean                   14.222
_diffrn_reflns_number                              77678
_diffrn_reflns_av_R_equivalents                    0.0336
_diffrn_reflns_theta_max                           27.520
_diffrn_reflns_theta_min                           3.144
_diffrn_reflns_theta_full                          25.242
_diffrn_measured_fraction_theta_max                0.996
_diffrn_measured_fraction_theta_full               0.998
_diffrn_reflns_Laue_measured_fraction_max          0.996
_diffrn_reflns_Laue_measured_fraction_full         0.998
_diffrn_reflns_point_group_measured_fraction_max   0.996
_diffrn_reflns_point_group_measured_fraction_full  0.998
_diffrn_reflns_limit_h_min                        -14
_diffrn_reflns_limit_h_max                         14
_diffrn_reflns_limit_k_min                        -28
_diffrn_reflns_limit_k_max                         28
_diffrn_reflns_limit_l_min                        -29
_diffrn_reflns_limit_l_max                         29
_diffrn_standards_number                           0
_diffrn_standards_interval_count                   .
_diffrn_standards_decay_%                          ?
_reflns_number_total                               12489
_reflns_number_gt                                  11907
_reflns_threshold_expression                       F^2^>2.0\s(F^2^)
_reflns_Friedel_coverage          0.000
_reflns_Friedel_fraction_max      .
_reflns_Friedel_fraction_full     .

#==============================================================================
# REFINEMENT DATA

_refine_special_details
;
    Refinement was performed using all reflections. The weighted 
    R-factor (wR) and goodness of fit (S) are based on F^2^.
    R-factor (gt) are based on F. The threshold expression of
    F^2^ > 2.0 sigma(F^2^) is used only for calculating R-factor (gt).
;
_refine_ls_structure_factor_coef                   Fsqd
_refine_ls_R_factor_all                            0.0537
_refine_ls_R_factor_gt                             0.0516
_refine_ls_wR_factor_ref                           0.1518
_refine_ls_wR_factor_gt                            0.1496
_refine_ls_number_restraints                       0
_refine_ls_hydrogen_treatment                      constr
_refine_ls_number_reflns                           12489
_refine_ls_number_parameters                       470
_refine_ls_goodness_of_fit_ref                     1.101
_refine_ls_weighting_scheme                        calc
_refine_ls_weighting_details
          'w = 1/[\s^2^(Fo^2^)+(0.0898P)^2^+12.9959P] where P=(Fo^2^+2Fc^2^)/3'
_atom_sites_solution_hydrogens                     geom
_atom_sites_solution_primary                       direct
_atom_sites_solution_secondary                     difmap
_refine_ls_shift/su_max                            0.001
_refine_diff_density_max                           2.30
_refine_diff_density_min                          -0.81
_refine_ls_extinction_method                       none
_refine_ls_extinction_coef                         ?

loop_
_atom_type_symbol
_atom_type_description
_atom_type_scat_dispersion_real
_atom_type_scat_dispersion_imag
_atom_type_scat_source
  'C' 'C'  0.0033 0.0016 
;
International Tables for Crystallography
(Vol. C, Tables 4.2.6.8 and 6.1.1.4)
;
  'H' 'H'  0.0000 0.0000 
;
International Tables for Crystallography
(Vol. C, Table 6.1.1.4)
;
  'N' 'N'  0.0061 0.0033 
;
International Tables for Crystallography
(Vol. C, Tables 4.2.6.8 and 6.1.1.4)
;
  'Pd' 'Pd'  -0.9988 1.0072 
;
International Tables for Crystallography
(Vol. C, Tables 4.2.6.8 and 6.1.1.4)
;
  'Si' 'Si'  0.0817 0.0704 
;
International Tables for Crystallography
(Vol. C, Tables 4.2.6.8 and 6.1.1.4)
;

#==============================================================================
# ATOMIC COORDINATES AND THERMAL PARAMETERS

loop_
 _atom_site_label
 _atom_site_type_symbol
 _atom_site_fract_x
 _atom_site_fract_y
 _atom_site_fract_z
 _atom_site_U_iso_or_equiv
 _atom_site_adp_type
 _atom_site_occupancy
 _atom_site_site_symmetry_order  
 _atom_site_calc_flag
 _atom_site_refinement_flags_posn
 _atom_site_refinement_flags_adp
 _atom_site_refinement_flags_occupancy
 _atom_site_disorder_assembly
 _atom_site_disorder_group
Pd1 Pd 1.08441(3) 0.34714(2) 0.48005(2) 0.03188(10) Uani 1 1 d . . . . .
Pd2 Pd 1.07048(3) 0.37266(2) 0.28340(2) 0.04022(11) Uani 1 1 d . . . . .
Pd3 Pd 0.75754(3) 0.25373(2) 0.36938(2) 0.02496(9) Uani 1 1 d . . . . .
Pd4 Pd 0.97266(3) 0.32031(2) 0.37665(2) 0.02494(9) Uani 1 1 d . . . . .
Si1 Si 1.14663(10) 0.38090(5) 0.38460(5) 0.0280(2) Uani 1 1 d . . . . .
Si2 Si 0.87993(10) 0.29843(5) 0.28888(4) 0.0251(2) Uani 1 1 d . . . . .
Si3 Si 0.89677(10) 0.27737(5) 0.45803(5) 0.0260(2) Uani 1 1 d . . . . .
N1 N 1.2643(3) 0.40595(18) 0.57413(17) 0.0367(8) Uani 1 1 d . . . . .
N2 N 1.2512(4) 0.4418(2) 0.20325(17) 0.0410(9) Uani 1 1 d . . . . .
N3 N 0.5613(3) 0.21551(17) 0.27061(15) 0.0313(7) Uani 1 1 d . . . . .
N4 N 0.5904(4) 0.1868(2) 0.45846(17) 0.0388(9) Uani 1 1 d . . . . .
C1 C 1.1964(4) 0.3839(2) 0.54121(19) 0.0371(10) Uani 1 1 d . . . . .
C2 C 1.3567(4) 0.4352(2) 0.6120(2) 0.0378(10) Uani 1 1 d . . . . .
C3 C 1.4753(5) 0.4003(3) 0.6076(3) 0.0605(16) Uani 1 1 d . . . . .
H3A H 1.5012 0.4007 0.5670 0.073 Uiso 1 1 calc R U . . .
H3B H 1.4625 0.3584 0.6201 0.073 Uiso 1 1 calc R U . . .
H3C H 1.5397 0.4191 0.6329 0.073 Uiso 1 1 calc R U . . .
C4 C 1.3670(6) 0.5002(3) 0.5925(3) 0.0607(16) Uani 1 1 d . . . . .
H4A H 1.2865 0.5202 0.5953 0.073 Uiso 1 1 calc R U . . .
H4B H 1.3928 0.5015 0.5519 0.073 Uiso 1 1 calc R U . . .
H4C H 1.4284 0.5213 0.6177 0.073 Uiso 1 1 calc R U . . .
C5 C 1.3108(5) 0.4322(3) 0.6742(2) 0.0478(12) Uani 1 1 d . . . . .
H5A H 1.3008 0.3898 0.6857 0.057 Uiso 1 1 calc R U . . .
H5B H 1.2311 0.4531 0.6758 0.057 Uiso 1 1 calc R U . . .
H5C H 1.3711 0.4519 0.7010 0.057 Uiso 1 1 calc R U . . .
C6 C 1.1821(5) 0.4173(3) 0.2315(2) 0.0452(12) Uani 1 1 d . . . . .
C7 C 1.3455(4) 0.4732(2) 0.1715(2) 0.0375(10) Uani 1 1 d . . . . .
C8 C 1.4327(6) 0.5030(3) 0.2170(3) 0.0649(18) Uani 1 1 d . . . . .
H8A H 1.4701 0.4718 0.2425 0.078 Uiso 1 1 calc R U . . .
H8B H 1.3862 0.5315 0.2406 0.078 Uiso 1 1 calc R U . . .
H8C H 1.4980 0.5248 0.1971 0.078 Uiso 1 1 calc R U . . .
C9 C 1.4125(6) 0.4268(3) 0.1353(3) 0.0607(15) Uani 1 1 d . . . . .
H9A H 1.3534 0.4072 0.1078 0.073 Uiso 1 1 calc R U . . .
H9B H 1.4506 0.3961 0.1612 0.073 Uiso 1 1 calc R U . . .
H9C H 1.4769 0.4470 0.1134 0.073 Uiso 1 1 calc R U . . .
C10 C 1.2828(6) 0.5200(3) 0.1327(3) 0.0574(14) Uani 1 1 d . . . . .
H10A H 1.2387 0.5490 0.1569 0.069 Uiso 1 1 calc R U . . .
H10B H 1.2238 0.5000 0.1055 0.069 Uiso 1 1 calc R U . . .
H10C H 1.3450 0.5416 0.1106 0.069 Uiso 1 1 calc R U . . .
C11 C 0.6409(4) 0.23184(19) 0.30199(17) 0.0283(8) Uani 1 1 d . . . . .
C12 C 0.4588(4) 0.1966(2) 0.23119(19) 0.0340(9) Uani 1 1 d . . . . .
C13 C 0.5142(5) 0.1652(3) 0.1790(2) 0.0485(12) Uani 1 1 d . . . . .
H13A H 0.5412 0.1243 0.1903 0.058 Uiso 1 1 calc R U . . .
H13B H 0.5854 0.1885 0.1661 0.058 Uiso 1 1 calc R U . . .
H13C H 0.4518 0.1625 0.1469 0.058 Uiso 1 1 calc R U . . .
C14 C 0.3880(5) 0.2531(3) 0.2112(2) 0.0466(12) Uani 1 1 d . . . . .
H14A H 0.4434 0.2801 0.1904 0.056 Uiso 1 1 calc R U . . .
H14B H 0.3568 0.2741 0.2454 0.056 Uiso 1 1 calc R U . . .
H14C H 0.3184 0.2414 0.1850 0.056 Uiso 1 1 calc R U . . .
C15 C 0.3769(5) 0.1541(3) 0.2650(3) 0.0489(12) Uani 1 1 d . . . . .
H15A H 0.4275 0.1216 0.2826 0.059 Uiso 1 1 calc R U . . .
H15B H 0.3137 0.1366 0.2383 0.059 Uiso 1 1 calc R U . . .
H15C H 0.3368 0.1768 0.2959 0.059 Uiso 1 1 calc R U . . .
C16 C 0.6572(4) 0.2139(2) 0.43111(18) 0.0330(9) Uani 1 1 d . . . . .
C17 C 0.5060(5) 0.1501(3) 0.4923(2) 0.0448(12) Uani 1 1 d . . . . .
C18 C 0.4323(7) 0.1109(4) 0.4480(3) 0.079(2) Uani 1 1 d . . . . .
H18A H 0.4894 0.0857 0.4263 0.095 Uiso 1 1 calc R U . . .
H18B H 0.3853 0.1371 0.4207 0.095 Uiso 1 1 calc R U . . .
H18C H 0.3751 0.0848 0.4688 0.095 Uiso 1 1 calc R U . . .
C19 C 0.4202(5) 0.1927(3) 0.5240(2) 0.0525(14) Uani 1 1 d . . . . .
H19A H 0.3826 0.1711 0.5562 0.063 Uiso 1 1 calc R U . . .
H19B H 0.3551 0.2072 0.4965 0.063 Uiso 1 1 calc R U . . .
H19C H 0.4678 0.2273 0.5395 0.063 Uiso 1 1 calc R U . . .
C20 C 0.5843(7) 0.1134(4) 0.5353(4) 0.077(2) Uani 1 1 d . . . . .
H20A H 0.6319 0.1408 0.5613 0.093 Uiso 1 1 calc R U . . .
H20B H 0.6412 0.0877 0.5140 0.093 Uiso 1 1 calc R U . . .
H20C H 0.5307 0.0879 0.5586 0.093 Uiso 1 1 calc R U . . .
C21 C 1.3134(4) 0.3531(2) 0.3779(2) 0.0358(9) Uani 1 1 d . . . . .
H21 H 1.3447 0.3702 0.3408 0.043 Uiso 1 1 calc R U . . .
C22 C 1.3147(5) 0.2841(2) 0.3721(2) 0.0464(12) Uani 1 1 d . . . . .
H22A H 1.2906 0.2657 0.4090 0.056 Uiso 1 1 calc R U . . .
H22B H 1.3981 0.2705 0.3631 0.056 Uiso 1 1 calc R U . . .
H22C H 1.2563 0.2717 0.3406 0.056 Uiso 1 1 calc R U . . .
C23 C 1.4036(5) 0.3724(3) 0.4273(3) 0.0512(13) Uani 1 1 d . . . . .
H23A H 1.4873 0.3592 0.4184 0.061 Uiso 1 1 calc R U . . .
H23B H 1.3793 0.3537 0.4640 0.061 Uiso 1 1 calc R U . . .
H23C H 1.4021 0.4165 0.4313 0.061 Uiso 1 1 calc R U . . .
C24 C 1.1519(4) 0.4673(2) 0.3996(2) 0.0371(9) Uani 1 1 d . . . . .
H24 H 1.1977 0.4727 0.4381 0.045 Uiso 1 1 calc R U . . .
C25 C 1.2219(5) 0.5038(2) 0.3549(3) 0.0484(12) Uani 1 1 d . . . . .
H25A H 1.2286 0.5460 0.3678 0.058 Uiso 1 1 calc R U . . .
H25B H 1.1772 0.5020 0.3168 0.058 Uiso 1 1 calc R U . . .
H25C H 1.3049 0.4868 0.3512 0.058 Uiso 1 1 calc R U . . .
C26 C 1.0224(5) 0.4931(2) 0.4070(3) 0.0546(14) Uani 1 1 d . . . . .
H26A H 0.9857 0.4745 0.4412 0.065 Uiso 1 1 calc R U . . .
H26B H 0.9707 0.4842 0.3719 0.065 Uiso 1 1 calc R U . . .
H26C H 1.0277 0.5370 0.4126 0.065 Uiso 1 1 calc R U . . .
C27 C 0.9335(4) 0.2356(2) 0.23814(19) 0.0337(9) Uani 1 1 d . . . . .
H27 H 0.8587 0.2182 0.2173 0.040 Uiso 1 1 calc R U . . .
C28 C 0.9978(5) 0.1844(2) 0.2728(2) 0.0447(11) Uani 1 1 d . . . . .
H28A H 1.0725 0.2001 0.2930 0.054 Uiso 1 1 calc R U . . .
H28B H 1.0203 0.1520 0.2460 0.054 Uiso 1 1 calc R U . . .
H28C H 0.9415 0.1684 0.3017 0.054 Uiso 1 1 calc R U . . .
C29 C 1.0200(6) 0.2602(3) 0.1919(2) 0.0522(14) Uani 1 1 d . . . . .
H29A H 1.0421 0.2274 0.1653 0.063 Uiso 1 1 calc R U . . .
H29B H 1.0951 0.2764 0.2113 0.063 Uiso 1 1 calc R U . . .
H29C H 0.9778 0.2925 0.1695 0.063 Uiso 1 1 calc R U . . .
C30 C 0.7910(4) 0.3554(2) 0.2406(2) 0.0367(10) Uani 1 1 d . . . . .
H30 H 0.8560 0.3804 0.2221 0.044 Uiso 1 1 calc R U . . .
C31 C 0.7205(7) 0.3989(3) 0.2763(3) 0.0679(18) Uani 1 1 d . . . . .
H31A H 0.6477 0.3786 0.2914 0.081 Uiso 1 1 calc R U . . .
H31B H 0.6940 0.4333 0.2518 0.081 Uiso 1 1 calc R U . . .
H31C H 0.7734 0.4134 0.3091 0.081 Uiso 1 1 calc R U . . .
C32 C 0.7120(6) 0.3297(3) 0.1892(3) 0.0592(16) Uani 1 1 d . . . . .
H32A H 0.6854 0.3627 0.1630 0.071 Uiso 1 1 calc R U . . .
H32B H 0.6392 0.3093 0.2042 0.071 Uiso 1 1 calc R U . . .
H32C H 0.7611 0.3005 0.1676 0.071 Uiso 1 1 calc R U . . .
C33 C 0.9588(4) 0.2028(2) 0.49051(18) 0.0329(9) Uani 1 1 d . . . . .
H33 H 0.8873 0.1750 0.4960 0.039 Uiso 1 1 calc R U . . .
C34 C 1.0469(5) 0.1728(2) 0.4481(2) 0.0435(11) Uani 1 1 d . . . . .
H34A H 1.0737 0.1335 0.4638 0.052 Uiso 1 1 calc R U . . .
H34B H 1.1192 0.1989 0.4433 0.052 Uiso 1 1 calc R U . . .
H34C H 1.0039 0.1670 0.4100 0.052 Uiso 1 1 calc R U . . .
C35 C 1.0273(5) 0.2115(2) 0.5501(2) 0.0431(11) Uani 1 1 d . . . . .
H35A H 1.0966 0.2395 0.5457 0.052 Uiso 1 1 calc R U . . .
H35B H 1.0588 0.1724 0.5643 0.052 Uiso 1 1 calc R U . . .
H35C H 0.9702 0.2282 0.5782 0.052 Uiso 1 1 calc R U . . .
C36 C 0.8187(4) 0.3210(2) 0.51913(18) 0.0317(9) Uani 1 1 d . . . . .
H36 H 0.8874 0.3334 0.5470 0.038 Uiso 1 1 calc R U . . .
C37 C 0.7628(4) 0.3800(2) 0.4959(2) 0.0393(10) Uani 1 1 d . . . . .
H37A H 0.7409 0.4058 0.5288 0.047 Uiso 1 1 calc R U . . .
H37B H 0.6884 0.3711 0.4716 0.047 Uiso 1 1 calc R U . . .
H37C H 0.8232 0.4010 0.4723 0.047 Uiso 1 1 calc R U . . .
C38 C 0.7269(5) 0.2874(2) 0.5561(2) 0.0422(11) Uani 1 1 d . . . . .
H38A H 0.7596 0.2471 0.5660 0.051 Uiso 1 1 calc R U . . .
H38B H 0.6480 0.2832 0.5339 0.051 Uiso 1 1 calc R U . . .
H38C H 0.7138 0.3102 0.5921 0.051 Uiso 1 1 calc R U . . .
C39 C 0.7199(10) 0.5209(5) 0.0845(5) 0.047(2) Uiso 0.5 1 d . . P . .
C40 C 0.7284(10) 0.5698(5) 0.1230(5) 0.047(2) Uiso 0.5 1 d . . P . .
C41 C 0.8062(11) 0.5670(5) 0.1715(5) 0.050(2) Uiso 0.5 1 d . . P . .
C42 C 0.8842(12) 0.5173(6) 0.1833(6) 0.055(3) Uiso 0.5 1 d . . P . .
C43 C 0.8749(13) 0.4710(7) 0.1412(6) 0.066(3) Uiso 0.5 1 d . . P . .
C44 C 0.8008(9) 0.4701(4) 0.1045(4) 0.0386(19) Uiso 0.5 1 d . . P . .
C45 C 0.6436(13) 0.5247(6) 0.0383(6) 0.064(3) Uiso 0.5 1 d . . P . .

loop_
 _atom_site_aniso_label
 _atom_site_aniso_U_11
 _atom_site_aniso_U_22
 _atom_site_aniso_U_33
 _atom_site_aniso_U_23
 _atom_site_aniso_U_13
 _atom_site_aniso_U_12
Pd1 0.02821(18) 0.0446(2) 0.02250(16) -0.00255(12) -0.00339(12) -0.01021(13)
Pd2 0.0398(2) 0.0565(2) 0.02411(17) 0.00626(14) -0.00301(14) -0.02397(16)
Pd3 0.02163(16) 0.03306(17) 0.02005(15) -0.00019(10) -0.00122(11) -0.00557(11)
Pd4 0.02231(16) 0.03282(17) 0.01951(15) -0.00014(10) -0.00139(11) -0.00602(11)
Si1 0.0223(5) 0.0329(6) 0.0286(5) -0.0007(4) -0.0013(4) -0.0056(4)
Si2 0.0238(5) 0.0316(5) 0.0196(5) 0.0001(4) -0.0017(4) -0.0030(4)
Si3 0.0239(5) 0.0348(6) 0.0193(5) 0.0005(4) -0.0011(4) -0.0026(4)
N1 0.0303(18) 0.043(2) 0.036(2) -0.0041(16) -0.0073(15) -0.0028(16)
N2 0.039(2) 0.050(2) 0.0336(19) 0.0070(17) 0.0002(16) -0.0159(18)
N3 0.0290(17) 0.0389(19) 0.0256(16) -0.0007(14) -0.0032(14) -0.0068(14)
N4 0.0321(19) 0.055(2) 0.0292(18) 0.0011(16) 0.0041(15) -0.0143(17)
C1 0.033(2) 0.050(3) 0.028(2) -0.0049(18) -0.0033(17) -0.0095(19)
C2 0.032(2) 0.036(2) 0.044(3) -0.0079(19) -0.0133(19) -0.0033(17)
C3 0.034(3) 0.080(4) 0.066(4) -0.016(3) -0.011(2) 0.008(3)
C4 0.067(4) 0.048(3) 0.067(4) 0.009(3) -0.007(3) -0.018(3)
C5 0.056(3) 0.048(3) 0.039(3) -0.006(2) -0.014(2) -0.006(2)
C6 0.048(3) 0.063(3) 0.025(2) 0.007(2) -0.0035(19) -0.026(2)
C7 0.033(2) 0.039(2) 0.040(2) 0.0093(19) 0.0076(18) -0.0065(18)
C8 0.052(3) 0.081(4) 0.061(4) 0.008(3) -0.005(3) -0.033(3)
C9 0.059(4) 0.056(3) 0.069(4) 0.006(3) 0.021(3) 0.009(3)
C10 0.062(4) 0.055(3) 0.056(3) 0.020(3) 0.007(3) 0.007(3)
C11 0.0280(19) 0.0332(19) 0.0236(18) 0.0017(15) 0.0003(15) -0.0029(16)
C12 0.027(2) 0.046(2) 0.028(2) -0.0065(18) -0.0069(16) -0.0048(18)
C13 0.045(3) 0.067(3) 0.033(2) -0.015(2) -0.004(2) 0.001(2)
C14 0.039(3) 0.062(3) 0.038(3) 0.001(2) -0.010(2) 0.003(2)
C15 0.035(2) 0.056(3) 0.055(3) -0.004(2) -0.005(2) -0.012(2)
C16 0.027(2) 0.048(2) 0.0230(18) 0.0005(17) -0.0020(15) -0.0075(18)
C17 0.041(3) 0.057(3) 0.037(2) 0.005(2) 0.011(2) -0.019(2)
C18 0.080(5) 0.094(5) 0.065(4) -0.022(4) 0.030(4) -0.054(4)
C19 0.044(3) 0.077(4) 0.037(3) 0.001(2) 0.012(2) -0.016(3)
C20 0.059(4) 0.092(5) 0.082(5) 0.046(4) 0.018(4) 0.002(4)
C21 0.024(2) 0.047(2) 0.036(2) 0.0022(18) 0.0026(17) -0.0037(17)
C22 0.036(2) 0.053(3) 0.051(3) -0.008(2) 0.003(2) 0.009(2)
C23 0.025(2) 0.071(4) 0.056(3) -0.005(3) -0.006(2) -0.005(2)
C24 0.038(2) 0.035(2) 0.038(2) -0.0026(18) -0.0035(18) -0.0070(18)
C25 0.049(3) 0.043(3) 0.054(3) 0.006(2) 0.005(2) -0.015(2)
C26 0.050(3) 0.037(3) 0.077(4) -0.001(3) 0.011(3) 0.002(2)
C27 0.034(2) 0.041(2) 0.027(2) -0.0089(17) 0.0033(16) -0.0056(18)
C28 0.045(3) 0.043(3) 0.047(3) -0.013(2) 0.002(2) 0.006(2)
C29 0.062(3) 0.058(3) 0.039(3) -0.012(2) 0.027(3) -0.009(3)
C30 0.033(2) 0.041(2) 0.036(2) 0.0086(18) -0.0077(18) -0.0053(18)
C31 0.066(4) 0.064(4) 0.074(4) 0.011(3) -0.004(3) 0.032(3)
C32 0.055(3) 0.068(4) 0.052(3) 0.024(3) -0.026(3) -0.018(3)
C33 0.030(2) 0.041(2) 0.0268(19) 0.0048(17) -0.0020(16) -0.0043(17)
C34 0.046(3) 0.042(2) 0.042(3) 0.008(2) -0.001(2) 0.009(2)
C35 0.048(3) 0.049(3) 0.032(2) 0.0071(19) -0.011(2) 0.000(2)
C36 0.026(2) 0.046(2) 0.0221(18) -0.0044(16) -0.0012(15) -0.0063(17)
C37 0.034(2) 0.042(2) 0.042(2) -0.0027(19) 0.0027(19) 0.0039(18)
C38 0.042(3) 0.056(3) 0.030(2) -0.002(2) 0.0110(19) -0.006(2)

#==============================================================================
_computing_data_collection
                                             'CrystalClear (Rigaku Inc., 2008)'
_computing_cell_refinement                         CrystalClear
_computing_data_reduction                          CrystalClear
_computing_structure_solution
                                                'SIR2011 (Burla, et al., 2012)'
_computing_structure_refinement                   'SHELXL97 (Sheldrick, 2008)'
_computing_publication_material
                                        'CrystalStructure 4.2.5 (Rigaku, 2017)'
_computing_molecular_graphics                     'CrystalStructure 4.2.5'

#==============================================================================
# MOLECULAR GEOMETRY

_geom_special_details
;
 All esds (except the esd in the dihedral angle between two l.s. planes)
 are estimated using the full covariance matrix.  The cell esds are taken
 into account individually in the estimation of esds in distances, angles
 and torsion angles; correlations between esds in cell parameters are only
 used when they are defined by crystal symmetry.  An approximate (isotropic)
 treatment of cell esds is used for estimating esds involving l.s. planes.
;

loop_
 _geom_bond_atom_site_label_1
 _geom_bond_atom_site_label_2
 _geom_bond_distance
 _geom_bond_site_symmetry_2
 _geom_bond_publ_flag
Pd1 C1 1.988(4) . ?
Pd1 Si1 2.4251(12) . ?
Pd1 Si3 2.5828(11) . ?
Pd1 Pd4 2.6812(4) . ?
Pd2 C6 1.986(5) . ?
Pd2 Si1 2.4339(12) . ?
Pd2 Si2 2.6401(11) . ?
Pd2 Pd4 2.6776(4) . ?
Pd3 C11 2.014(4) . ?
Pd3 C16 2.015(4) . ?
Pd3 Si2 2.5094(11) . ?
Pd3 Si3 2.5341(11) . ?
Pd3 Pd4 2.7524(4) . ?
Pd4 Si2 2.2622(11) . ?
Pd4 Si3 2.2692(11) . ?
Pd4 Si1 2.3106(11) . ?
Si1 C21 1.917(5) . ?
Si1 C24 1.938(5) . ?
Si2 C30 1.910(5) . ?
Si2 C27 1.913(4) . ?
Si3 C33 1.917(5) . ?
Si3 C36 1.919(4) . ?
N1 C1 1.141(6) . ?
N1 C2 1.449(5) . ?
N2 C6 1.142(6) . ?
N2 C7 1.449(6) . ?
N3 C11 1.158(5) . ?
N3 C12 1.464(5) . ?
N4 C16 1.141(6) . ?
N4 C17 1.465(6) . ?
C2 C3 1.503(7) . ?
C2 C4 1.510(7) . ?
C2 C5 1.525(7) . ?
C3 H3A 0.9800 . ?
C3 H3B 0.9800 . ?
C3 H3C 0.9800 . ?
C4 H4A 0.9800 . ?
C4 H4B 0.9800 . ?
C4 H4C 0.9800 . ?
C5 H5A 0.9800 . ?
C5 H5B 0.9800 . ?
C5 H5C 0.9800 . ?
C7 C10 1.507(7) . ?
C7 C9 1.520(8) . ?
C7 C8 1.527(8) . ?
C8 H8A 0.9800 . ?
C8 H8B 0.9800 . ?
C8 H8C 0.9800 . ?
C9 H9A 0.9800 . ?
C9 H9B 0.9800 . ?
C9 H9C 0.9800 . ?
C10 H10A 0.9800 . ?
C10 H10B 0.9800 . ?
C10 H10C 0.9800 . ?
C12 C15 1.520(7) . ?
C12 C13 1.523(7) . ?
C12 C14 1.525(7) . ?
C13 H13A 0.9800 . ?
C13 H13B 0.9800 . ?
C13 H13C 0.9800 . ?
C14 H14A 0.9800 . ?
C14 H14B 0.9800 . ?
C14 H14C 0.9800 . ?
C15 H15A 0.9800 . ?
C15 H15B 0.9800 . ?
C15 H15C 0.9800 . ?
C17 C20 1.509(9) . ?
C17 C19 1.524(8) . ?
C17 C18 1.533(8) . ?
C18 H18A 0.9800 . ?
C18 H18B 0.9800 . ?
C18 H18C 0.9800 . ?
C19 H19A 0.9800 . ?
C19 H19B 0.9800 . ?
C19 H19C 0.9800 . ?
C20 H20A 0.9800 . ?
C20 H20B 0.9800 . ?
C20 H20C 0.9800 . ?
C21 C23 1.524(7) . ?
C21 C22 1.531(7) . ?
C21 H21 1.0000 . ?
C22 H22A 0.9800 . ?
C22 H22B 0.9800 . ?
C22 H22C 0.9800 . ?
C23 H23A 0.9800 . ?
C23 H23B 0.9800 . ?
C23 H23C 0.9800 . ?
C24 C25 1.526(7) . ?
C24 C26 1.527(7) . ?
C24 H24 1.0000 . ?
C25 H25A 0.9800 . ?
C25 H25B 0.9800 . ?
C25 H25C 0.9800 . ?
C26 H26A 0.9800 . ?
C26 H26B 0.9800 . ?
C26 H26C 0.9800 . ?
C27 C28 1.532(7) . ?
C27 C29 1.538(6) . ?
C27 H27 1.0000 . ?
C28 H28A 0.9800 . ?
C28 H28B 0.9800 . ?
C28 H28C 0.9800 . ?
C29 H29A 0.9800 . ?
C29 H29B 0.9800 . ?
C29 H29C 0.9800 . ?
C30 C31 1.487(8) . ?
C30 C32 1.537(7) . ?
C30 H30 1.0000 . ?
C31 H31A 0.9800 . ?
C31 H31B 0.9800 . ?
C31 H31C 0.9800 . ?
C32 H32A 0.9800 . ?
C32 H32B 0.9800 . ?
C32 H32C 0.9800 . ?
C33 C34 1.535(7) . ?
C33 C35 1.538(6) . ?
C33 H33 1.0000 . ?
C34 H34A 0.9800 . ?
C34 H34B 0.9800 . ?
C34 H34C 0.9800 . ?
C35 H35A 0.9800 . ?
C35 H35B 0.9800 . ?
C35 H35C 0.9800 . ?
C36 C38 1.521(6) . ?
C36 C37 1.523(6) . ?
C36 H36 1.0000 . ?
C37 H37A 0.9800 . ?
C37 H37B 0.9800 . ?
C37 H37C 0.9800 . ?
C38 H38A 0.9800 . ?
C38 H38B 0.9800 . ?
C38 H38C 0.9800 . ?
C39 C45 1.319(18) . ?
C39 C40 1.394(15) . ?
C39 C44 1.485(14) . ?
C40 C41 1.369(16) . ?
C41 C42 1.405(17) . ?
C42 C43 1.406(19) . ?
C43 C44 1.138(17) . ?

loop_
 _geom_angle_atom_site_label_1
 _geom_angle_atom_site_label_2
 _geom_angle_atom_site_label_3
 _geom_angle
 _geom_angle_site_symmetry_1
 _geom_angle_site_symmetry_3
 _geom_angle_publ_flag
C1 Pd1 Si1 108.99(14) . . ?
C1 Pd1 Si3 146.51(14) . . ?
Si1 Pd1 Si3 104.50(4) . . ?
C1 Pd1 Pd4 162.37(14) . . ?
Si1 Pd1 Pd4 53.52(3) . . ?
Si3 Pd1 Pd4 51.03(2) . . ?
C6 Pd2 Si1 109.81(14) . . ?
C6 Pd2 Si2 146.07(14) . . ?
Si1 Pd2 Si2 103.80(4) . . ?
C6 Pd2 Pd4 163.14(13) . . ?
Si1 Pd2 Pd4 53.49(3) . . ?
Si2 Pd2 Pd4 50.35(2) . . ?
C11 Pd3 C16 95.32(16) . . ?
C11 Pd3 Si2 82.28(12) . . ?
C16 Pd3 Si2 176.83(13) . . ?
C11 Pd3 Si3 176.62(12) . . ?
C16 Pd3 Si3 81.33(12) . . ?
Si2 Pd3 Si3 101.05(4) . . ?
C11 Pd3 Pd4 132.74(11) . . ?
C16 Pd3 Pd4 131.87(12) . . ?
Si2 Pd3 Pd4 50.67(2) . . ?
Si3 Pd3 Pd4 50.63(3) . . ?
Si2 Pd4 Si3 118.44(4) . . ?
Si2 Pd4 Si1 121.76(4) . . ?
Si3 Pd4 Si1 119.73(4) . . ?
Si2 Pd4 Pd2 63.97(3) . . ?
Si3 Pd4 Pd2 177.56(3) . . ?
Si1 Pd4 Pd2 57.85(3) . . ?
Si2 Pd4 Pd1 179.32(3) . . ?
Si3 Pd4 Pd1 62.24(3) . . ?
Si1 Pd4 Pd1 57.56(3) . . ?
Pd2 Pd4 Pd1 115.354(15) . . ?
Si2 Pd4 Pd3 59.09(3) . . ?
Si3 Pd4 Pd3 59.70(3) . . ?
Si1 Pd4 Pd3 176.68(3) . . ?
Pd2 Pd4 Pd3 122.739(14) . . ?
Pd1 Pd4 Pd3 121.577(14) . . ?
C21 Si1 C24 107.9(2) . . ?
C21 Si1 Pd4 125.09(15) . . ?
C24 Si1 Pd4 127.02(15) . . ?
C21 Si1 Pd1 105.48(15) . . ?
C24 Si1 Pd1 98.64(15) . . ?
Pd4 Si1 Pd1 68.92(3) . . ?
C21 Si1 Pd2 100.75(15) . . ?
C24 Si1 Pd2 104.40(15) . . ?
Pd4 Si1 Pd2 68.66(3) . . ?
Pd1 Si1 Pd2 137.49(5) . . ?
C30 Si2 C27 106.6(2) . . ?
C30 Si2 Pd4 124.66(16) . . ?
C27 Si2 Pd4 123.97(15) . . ?
C30 Si2 Pd3 114.49(15) . . ?
C27 Si2 Pd3 109.84(15) . . ?
Pd4 Si2 Pd3 70.24(3) . . ?
C30 Si2 Pd2 86.62(14) . . ?
C27 Si2 Pd2 99.62(14) . . ?
Pd4 Si2 Pd2 65.69(3) . . ?
Pd3 Si2 Pd2 135.49(4) . . ?
C33 Si3 C36 107.83(19) . . ?
C33 Si3 Pd4 122.98(14) . . ?
C36 Si3 Pd4 124.74(15) . . ?
C33 Si3 Pd3 108.80(14) . . ?
C36 Si3 Pd3 114.91(13) . . ?
Pd4 Si3 Pd3 69.67(3) . . ?
C33 Si3 Pd1 100.09(14) . . ?
C36 Si3 Pd1 85.57(13) . . ?
Pd4 Si3 Pd1 66.73(3) . . ?
Pd3 Si3 Pd1 135.90(5) . . ?
C1 N1 C2 175.4(5) . . ?
C6 N2 C7 175.4(5) . . ?
C11 N3 C12 178.3(5) . . ?
C16 N4 C17 177.8(5) . . ?
N1 C1 Pd1 176.6(4) . . ?
N1 C2 C3 107.7(4) . . ?
N1 C2 C4 107.7(4) . . ?
C3 C2 C4 113.3(5) . . ?
N1 C2 C5 107.3(4) . . ?
C3 C2 C5 110.4(5) . . ?
C4 C2 C5 110.2(5) . . ?
C2 C3 H3A 109.5 . . ?
C2 C3 H3B 109.5 . . ?
H3A C3 H3B 109.5 . . ?
C2 C3 H3C 109.5 . . ?
H3A C3 H3C 109.5 . . ?
H3B C3 H3C 109.5 . . ?
C2 C4 H4A 109.5 . . ?
C2 C4 H4B 109.5 . . ?
H4A C4 H4B 109.5 . . ?
C2 C4 H4C 109.5 . . ?
H4A C4 H4C 109.5 . . ?
H4B C4 H4C 109.5 . . ?
C2 C5 H5A 109.5 . . ?
C2 C5 H5B 109.5 . . ?
H5A C5 H5B 109.5 . . ?
C2 C5 H5C 109.5 . . ?
H5A C5 H5C 109.5 . . ?
H5B C5 H5C 109.5 . . ?
N2 C6 Pd2 176.6(5) . . ?
N2 C7 C10 108.2(4) . . ?
N2 C7 C9 108.0(4) . . ?
C10 C7 C9 110.8(5) . . ?
N2 C7 C8 107.1(4) . . ?
C10 C7 C8 111.0(5) . . ?
C9 C7 C8 111.5(5) . . ?
C7 C8 H8A 109.5 . . ?
C7 C8 H8B 109.5 . . ?
H8A C8 H8B 109.5 . . ?
C7 C8 H8C 109.5 . . ?
H8A C8 H8C 109.5 . . ?
H8B C8 H8C 109.5 . . ?
C7 C9 H9A 109.5 . . ?
C7 C9 H9B 109.5 . . ?
H9A C9 H9B 109.5 . . ?
C7 C9 H9C 109.5 . . ?
H9A C9 H9C 109.5 . . ?
H9B C9 H9C 109.5 . . ?
C7 C10 H10A 109.5 . . ?
C7 C10 H10B 109.5 . . ?
H10A C10 H10B 109.5 . . ?
C7 C10 H10C 109.5 . . ?
H10A C10 H10C 109.5 . . ?
H10B C10 H10C 109.5 . . ?
N3 C11 Pd3 168.3(4) . . ?
N3 C12 C15 107.8(4) . . ?
N3 C12 C13 107.5(4) . . ?
C15 C12 C13 111.8(4) . . ?
N3 C12 C14 108.1(4) . . ?
C15 C12 C14 111.2(4) . . ?
C13 C12 C14 110.2(4) . . ?
C12 C13 H13A 109.5 . . ?
C12 C13 H13B 109.5 . . ?
H13A C13 H13B 109.5 . . ?
C12 C13 H13C 109.5 . . ?
H13A C13 H13C 109.5 . . ?
H13B C13 H13C 109.5 . . ?
C12 C14 H14A 109.5 . . ?
C12 C14 H14B 109.5 . . ?
H14A C14 H14B 109.5 . . ?
C12 C14 H14C 109.5 . . ?
H14A C14 H14C 109.5 . . ?
H14B C14 H14C 109.5 . . ?
C12 C15 H15A 109.5 . . ?
C12 C15 H15B 109.5 . . ?
H15A C15 H15B 109.5 . . ?
C12 C15 H15C 109.5 . . ?
H15A C15 H15C 109.5 . . ?
H15B C15 H15C 109.5 . . ?
N4 C16 Pd3 168.8(4) . . ?
N4 C17 C20 107.2(5) . . ?
N4 C17 C19 108.1(4) . . ?
C20 C17 C19 111.1(5) . . ?
N4 C17 C18 106.4(4) . . ?
C20 C17 C18 113.2(6) . . ?
C19 C17 C18 110.6(5) . . ?
C17 C18 H18A 109.5 . . ?
C17 C18 H18B 109.5 . . ?
H18A C18 H18B 109.5 . . ?
C17 C18 H18C 109.5 . . ?
H18A C18 H18C 109.5 . . ?
H18B C18 H18C 109.5 . . ?
C17 C19 H19A 109.5 . . ?
C17 C19 H19B 109.5 . . ?
H19A C19 H19B 109.5 . . ?
C17 C19 H19C 109.5 . . ?
H19A C19 H19C 109.5 . . ?
H19B C19 H19C 109.5 . . ?
C17 C20 H20A 109.5 . . ?
C17 C20 H20B 109.5 . . ?
H20A C20 H20B 109.5 . . ?
C17 C20 H20C 109.5 . . ?
H20A C20 H20C 109.5 . . ?
H20B C20 H20C 109.5 . . ?
C23 C21 C22 109.5(4) . . ?
C23 C21 Si1 115.5(4) . . ?
C22 C21 Si1 109.7(3) . . ?
C23 C21 H21 107.3 . . ?
C22 C21 H21 107.3 . . ?
Si1 C21 H21 107.3 . . ?
C21 C22 H22A 109.5 . . ?
C21 C22 H22B 109.5 . . ?
H22A C22 H22B 109.5 . . ?
C21 C22 H22C 109.5 . . ?
H22A C22 H22C 109.5 . . ?
H22B C22 H22C 109.5 . . ?
C21 C23 H23A 109.5 . . ?
C21 C23 H23B 109.5 . . ?
H23A C23 H23B 109.5 . . ?
C21 C23 H23C 109.5 . . ?
H23A C23 H23C 109.5 . . ?
H23B C23 H23C 109.5 . . ?
C25 C24 C26 110.9(4) . . ?
C25 C24 Si1 114.4(4) . . ?
C26 C24 Si1 111.4(3) . . ?
C25 C24 H24 106.5 . . ?
C26 C24 H24 106.5 . . ?
Si1 C24 H24 106.5 . . ?
C24 C25 H25A 109.5 . . ?
C24 C25 H25B 109.5 . . ?
H25A C25 H25B 109.5 . . ?
C24 C25 H25C 109.5 . . ?
H25A C25 H25C 109.5 . . ?
H25B C25 H25C 109.5 . . ?
C24 C26 H26A 109.5 . . ?
C24 C26 H26B 109.5 . . ?
H26A C26 H26B 109.5 . . ?
C24 C26 H26C 109.5 . . ?
H26A C26 H26C 109.5 . . ?
H26B C26 H26C 109.5 . . ?
C28 C27 C29 109.9(4) . . ?
C28 C27 Si2 111.3(3) . . ?
C29 C27 Si2 111.5(3) . . ?
C28 C27 H27 108.0 . . ?
C29 C27 H27 108.0 . . ?
Si2 C27 H27 108.0 . . ?
C27 C28 H28A 109.5 . . ?
C27 C28 H28B 109.5 . . ?
H28A C28 H28B 109.5 . . ?
C27 C28 H28C 109.5 . . ?
H28A C28 H28C 109.5 . . ?
H28B C28 H28C 109.5 . . ?
C27 C29 H29A 109.5 . . ?
C27 C29 H29B 109.5 . . ?
H29A C29 H29B 109.5 . . ?
C27 C29 H29C 109.5 . . ?
H29A C29 H29C 109.5 . . ?
H29B C29 H29C 109.5 . . ?
C31 C30 C32 112.1(5) . . ?
C31 C30 Si2 111.5(4) . . ?
C32 C30 Si2 116.8(4) . . ?
C31 C30 H30 105.1 . . ?
C32 C30 H30 105.1 . . ?
Si2 C30 H30 105.1 . . ?
C30 C31 H31A 109.5 . . ?
C30 C31 H31B 109.5 . . ?
H31A C31 H31B 109.5 . . ?
C30 C31 H31C 109.5 . . ?
H31A C31 H31C 109.5 . . ?
H31B C31 H31C 109.5 . . ?
C30 C32 H32A 109.5 . . ?
C30 C32 H32B 109.5 . . ?
H32A C32 H32B 109.5 . . ?
C30 C32 H32C 109.5 . . ?
H32A C32 H32C 109.5 . . ?
H32B C32 H32C 109.5 . . ?
C34 C33 C35 108.9(4) . . ?
C34 C33 Si3 110.0(3) . . ?
C35 C33 Si3 112.7(3) . . ?
C34 C33 H33 108.4 . . ?
C35 C33 H33 108.4 . . ?
Si3 C33 H33 108.4 . . ?
C33 C34 H34A 109.5 . . ?
C33 C34 H34B 109.5 . . ?
H34A C34 H34B 109.5 . . ?
C33 C34 H34C 109.5 . . ?
H34A C34 H34C 109.5 . . ?
H34B C34 H34C 109.5 . . ?
C33 C35 H35A 109.5 . . ?
C33 C35 H35B 109.5 . . ?
H35A C35 H35B 109.5 . . ?
C33 C35 H35C 109.5 . . ?
H35A C35 H35C 109.5 . . ?
H35B C35 H35C 109.5 . . ?
C38 C36 C37 110.6(4) . . ?
C38 C36 Si3 118.3(3) . . ?
C37 C36 Si3 110.8(3) . . ?
C38 C36 H36 105.4 . . ?
C37 C36 H36 105.4 . . ?
Si3 C36 H36 105.4 . . ?
C36 C37 H37A 109.5 . . ?
C36 C37 H37B 109.5 . . ?
H37A C37 H37B 109.5 . . ?
C36 C37 H37C 109.5 . . ?
H37A C37 H37C 109.5 . . ?
H37B C37 H37C 109.5 . . ?
C36 C38 H38A 109.5 . . ?
C36 C38 H38B 109.5 . . ?
H38A C38 H38B 109.5 . . ?
C36 C38 H38C 109.5 . . ?
H38A C38 H38C 109.5 . . ?
H38B C38 H38C 109.5 . . ?
C45 C39 C40 118.7(11) . . ?
C45 C39 C44 129.8(11) . . ?
C40 C39 C44 111.5(9) . . ?
C41 C40 C39 120.1(10) . . ?
C40 C41 C42 122.6(11) . . ?
C43 C42 C41 114.1(12) . . ?
C44 C43 C42 123.2(14) . . ?
C43 C44 C39 127.2(12) . . ?

loop_
 _geom_torsion_atom_site_label_1
 _geom_torsion_atom_site_label_2
 _geom_torsion_atom_site_label_3
 _geom_torsion_atom_site_label_4
 _geom_torsion
 _geom_torsion_site_symmetry_1
 _geom_torsion_site_symmetry_2
 _geom_torsion_site_symmetry_3
 _geom_torsion_site_symmetry_4
 _geom_torsion_publ_flag
C45 C39 C40 C41 179.7(12) . . . . ?
C44 C39 C40 C41 1.0(15) . . . . ?
C39 C40 C41 C42 3.1(18) . . . . ?
C40 C41 C42 C43 0.0(18) . . . . ?
C41 C42 C43 C44 -9(2) . . . . ?
C42 C43 C44 C39 15(2) . . . . ?
C45 C39 C44 C43 170.9(15) . . . . ?
C40 C39 C44 C43 -10.7(18) . . . . ?

#==============================================================================

#==============================================================================
# Additional structures and associated data_? identifiers
# should be added at this point if there is more than one 
# structure analysis in the CIF.

_shelxl_version_number 2014-1

_shelx_res_file
;
TITL Pd4Si3(CNtBu)4
CELL  0.71075 10.81790 22.07830 22.86540 90.00000 92.13910 90.00000
ZERR  4 0.00060 0.00120 0.00120 0.00000 0.00120 0.00000
LATT 1
SYMM .50-X, .50+Y, .50-Z
SFAC C H N PD SI
UNIT 152 312 16 16 12
L.S. 50
FMAP 2
PLAN 25
WPDB -2
HTAB
BOND $H
CONF
LIST 4
TEMP -80.0
ACTA
SIZE 0.150 0.100 0.080
WGHT    0.089800   12.995900
FVAR       0.55376
PD1   4    1.084415    0.347143    0.480050    11.00000    0.02821    0.04460 =
         0.02250   -0.00255   -0.00339   -0.01021
PD2   4    1.070480    0.372661    0.283403    11.00000    0.03975    0.05647 =
         0.02411    0.00626   -0.00301   -0.02397
PD3   4    0.757542    0.253726    0.369377    11.00000    0.02163    0.03306 =
         0.02005   -0.00019   -0.00122   -0.00557
PD4   4    0.972663    0.320314    0.376649    11.00000    0.02231    0.03282 =
         0.01951   -0.00014   -0.00139   -0.00602
SI1   5    1.146628    0.380904    0.384602    11.00000    0.02232    0.03286 =
         0.02862   -0.00071   -0.00129   -0.00559
SI2   5    0.879927    0.298433    0.288875    11.00000    0.02385    0.03163 =
         0.01962    0.00006   -0.00168   -0.00303
SI3   5    0.896767    0.277371    0.458028    11.00000    0.02390    0.03476 =
         0.01925    0.00050   -0.00113   -0.00264
N1    3    1.264296    0.405951    0.574129    11.00000    0.03035    0.04308 =
         0.03598   -0.00406   -0.00728   -0.00284
N2    3    1.251246    0.441822    0.203253    11.00000    0.03927    0.05020 =
         0.03357    0.00704    0.00022   -0.01589
N3    3    0.561293    0.215514    0.270609    11.00000    0.02902    0.03891 =
         0.02565   -0.00072   -0.00319   -0.00676
N4    3    0.590445    0.186839    0.458461    11.00000    0.03205    0.05521 =
         0.02921    0.00107    0.00409   -0.01430
C1    1    1.196351    0.383884    0.541209    11.00000    0.03297    0.04983 =
         0.02810   -0.00488   -0.00333   -0.00954
C2    1    1.356716    0.435168    0.611995    11.00000    0.03185    0.03615 =
         0.04438   -0.00791   -0.01333   -0.00332
C3    1    1.475323    0.400299    0.607619    11.00000    0.03427    0.08012 =
         0.06603   -0.01594   -0.01054    0.00776
AFIX  33
H3A   2    1.501173    0.400673    0.566997    11.00000   -1.20000
H3B   2    1.462458    0.358389    0.620132    11.00000   -1.20000
H3C   2    1.539680    0.419098    0.632873    11.00000   -1.20000
AFIX   0
C4    1    1.367031    0.500245    0.592515    11.00000    0.06687    0.04785 =
         0.06676    0.00897   -0.00731   -0.01781
AFIX  33
H4A   2    1.286540    0.520202    0.595268    11.00000   -1.20000
H4B   2    1.392837    0.501501    0.551903    11.00000   -1.20000
H4C   2    1.428414    0.521278    0.617730    11.00000   -1.20000
AFIX   0
C5    1    1.310829    0.432234    0.674190    11.00000    0.05604    0.04758 =
         0.03857   -0.00551   -0.01411   -0.00590
AFIX  33
H5A   2    1.300782    0.389800    0.685657    11.00000   -1.20000
H5B   2    1.231116    0.453135    0.675836    11.00000   -1.20000
H5C   2    1.371102    0.451880    0.701043    11.00000   -1.20000
AFIX   0
C6    1    1.182132    0.417332    0.231517    11.00000    0.04778    0.06280 =
         0.02471    0.00690   -0.00349   -0.02559
C7    1    1.345474    0.473229    0.171537    11.00000    0.03332    0.03942 =
         0.04015    0.00931    0.00757   -0.00647
C8    1    1.432738    0.503025    0.217001    11.00000    0.05181    0.08112 =
         0.06114    0.00763   -0.00462   -0.03272
AFIX  33
H8A   2    1.470100    0.471833    0.242517    11.00000   -1.20000
H8B   2    1.386156    0.531536    0.240552    11.00000   -1.20000
H8C   2    1.497966    0.524831    0.197115    11.00000   -1.20000
AFIX   0
C9    1    1.412548    0.426768    0.135265    11.00000    0.05864    0.05569 =
         0.06910    0.00581    0.02054    0.00949
AFIX  33
H9A   2    1.353387    0.407202    0.107807    11.00000   -1.20000
H9B   2    1.450598    0.396148    0.161218    11.00000   -1.20000
H9C   2    1.476894    0.447008    0.113390    11.00000   -1.20000
AFIX   0
C10   1    1.282764    0.520047    0.132739    11.00000    0.06161    0.05526 =
         0.05575    0.02000    0.00739    0.00747
AFIX  33
H10A  2    1.238652    0.548979    0.156892    11.00000   -1.20000
H10B  2    1.223836    0.500047    0.105472    11.00000   -1.20000
H10C  2    1.345020    0.541562    0.110622    11.00000   -1.20000
AFIX   0
C11   1    0.640918    0.231838    0.301989    11.00000    0.02796    0.03316 =
         0.02362    0.00168    0.00032   -0.00288
C12   1    0.458795    0.196555    0.231192    11.00000    0.02698    0.04639 =
         0.02809   -0.00650   -0.00692   -0.00476
C13   1    0.514237    0.165162    0.178967    11.00000    0.04534    0.06685 =
         0.03298   -0.01502   -0.00439    0.00074
AFIX  33
H13A  2    0.541229    0.124312    0.190318    11.00000   -1.20000
H13B  2    0.585355    0.188468    0.166081    11.00000   -1.20000
H13C  2    0.451800    0.162506    0.146897    11.00000   -1.20000
AFIX   0
C14   1    0.388005    0.253077    0.211199    11.00000    0.03891    0.06199 =
         0.03816    0.00081   -0.01003    0.00349
AFIX  33
H14A  2    0.443379    0.280053    0.190427    11.00000   -1.20000
H14B  2    0.356766    0.274131    0.245368    11.00000   -1.20000
H14C  2    0.318387    0.241362    0.184957    11.00000   -1.20000
AFIX   0
C15   1    0.376906    0.154109    0.264978    11.00000    0.03474    0.05646 =
         0.05499   -0.00419   -0.00536   -0.01205
AFIX  33
H15A  2    0.427495    0.121609    0.282607    11.00000   -1.20000
H15B  2    0.313651    0.136568    0.238255    11.00000   -1.20000
H15C  2    0.336781    0.176787    0.295854    11.00000   -1.20000
AFIX   0
C16   1    0.657172    0.213879    0.431107    11.00000    0.02747    0.04835 =
         0.02302    0.00050   -0.00195   -0.00746
C17   1    0.506015    0.150051    0.492342    11.00000    0.04130    0.05712 =
         0.03677    0.00495    0.01129   -0.01896
C18   1    0.432310    0.110885    0.448030    11.00000    0.07958    0.09422 =
         0.06458   -0.02245    0.02971   -0.05424
AFIX  33
H18A  2    0.489383    0.085691    0.426298    11.00000   -1.20000
H18B  2    0.385306    0.137089    0.420688    11.00000   -1.20000
H18C  2    0.375122    0.084835    0.468773    11.00000   -1.20000
AFIX   0
C19   1    0.420234    0.192735    0.523957    11.00000    0.04389    0.07736 =
         0.03699    0.00065    0.01163   -0.01630
AFIX  33
H19A  2    0.382601    0.171113    0.556224    11.00000   -1.20000
H19B  2    0.355147    0.207232    0.496462    11.00000   -1.20000
H19C  2    0.467786    0.227314    0.539518    11.00000   -1.20000
AFIX   0
C20   1    0.584329    0.113381    0.535347    11.00000    0.05870    0.09215 =
         0.08197    0.04578    0.01789    0.00206
AFIX  33
H20A  2    0.631895    0.140762    0.561330    11.00000   -1.20000
H20B  2    0.641214    0.087716    0.514002    11.00000   -1.20000
H20C  2    0.530727    0.087853    0.558632    11.00000   -1.20000
AFIX   0
C21   1    1.313411    0.353137    0.377931    11.00000    0.02413    0.04745 =
         0.03607    0.00216    0.00265   -0.00372
AFIX  13
H21   2    1.344725    0.370191    0.340770    11.00000   -1.20000
AFIX   0
C22   1    1.314711    0.284051    0.372122    11.00000    0.03558    0.05252 =
         0.05117   -0.00759    0.00350    0.00928
AFIX  33
H22A  2    1.290576    0.265710    0.409020    11.00000   -1.20000
H22B  2    1.398126    0.270529    0.363052    11.00000   -1.20000
H22C  2    1.256263    0.271697    0.340577    11.00000   -1.20000
AFIX   0
C23   1    1.403555    0.372355    0.427305    11.00000    0.02527    0.07122 =
         0.05641   -0.00536   -0.00621   -0.00538
AFIX  33
H23A  2    1.487266    0.359178    0.418357    11.00000   -1.20000
H23B  2    1.379289    0.353700    0.464036    11.00000   -1.20000
H23C  2    1.402067    0.416544    0.431268    11.00000   -1.20000
AFIX   0
C24   1    1.151887    0.467282    0.399620    11.00000    0.03768    0.03512 =
         0.03810   -0.00255   -0.00354   -0.00698
AFIX  13
H24   2    1.197655    0.472723    0.438069    11.00000   -1.20000
AFIX   0
C25   1    1.221916    0.503811    0.354852    11.00000    0.04863    0.04332 =
         0.05354    0.00567    0.00451   -0.01464
AFIX  33
H25A  2    1.228551    0.546050    0.367766    11.00000   -1.20000
H25B  2    1.177212    0.502049    0.316816    11.00000   -1.20000
H25C  2    1.304944    0.486788    0.351235    11.00000   -1.20000
AFIX   0
C26   1    1.022399    0.493051    0.406995    11.00000    0.05043    0.03658 =
         0.07737   -0.00079    0.01147    0.00193
AFIX  33
H26A  2    0.985673    0.474505    0.441200    11.00000   -1.20000
H26B  2    0.970681    0.484192    0.371937    11.00000   -1.20000
H26C  2    1.027745    0.536995    0.412582    11.00000   -1.20000
AFIX   0
C27   1    0.933467    0.235552    0.238141    11.00000    0.03378    0.04067 =
         0.02670   -0.00889    0.00326   -0.00565
AFIX  13
H27   2    0.858667    0.218241    0.217258    11.00000   -1.20000
AFIX   0
C28   1    0.997751    0.184395    0.272840    11.00000    0.04474    0.04289 =
         0.04659   -0.01336    0.00184    0.00629
AFIX  33
H28A  2    1.072543    0.200129    0.293023    11.00000   -1.20000
H28B  2    1.020322    0.151955    0.246000    11.00000   -1.20000
H28C  2    0.941505    0.168380    0.301691    11.00000   -1.20000
AFIX   0
C29   1    1.019969    0.260202    0.191870    11.00000    0.06172    0.05792 =
         0.03874   -0.01160    0.02734   -0.00883
AFIX  33
H29A  2    1.042109    0.227405    0.165345    11.00000   -1.20000
H29B  2    1.095133    0.276447    0.211310    11.00000   -1.20000
H29C  2    0.977788    0.292462    0.169470    11.00000   -1.20000
AFIX   0
C30   1    0.790965    0.355445    0.240646    11.00000    0.03281    0.04089 =
         0.03566    0.00856   -0.00769   -0.00534
AFIX  13
H30   2    0.856033    0.380385    0.222138    11.00000   -1.20000
AFIX   0
C31   1    0.720507    0.398904    0.276272    11.00000    0.06581    0.06356 =
         0.07387    0.01054   -0.00355    0.03215
AFIX  33
H31A  2    0.647712    0.378620    0.291383    11.00000   -1.20000
H31B  2    0.693972    0.433332    0.251835    11.00000   -1.20000
H31C  2    0.773406    0.413398    0.309074    11.00000   -1.20000
AFIX   0
C32   1    0.712014    0.329665    0.189193    11.00000    0.05487    0.06834 =
         0.05213    0.02440   -0.02635   -0.01830
AFIX  33
H32A  2    0.685429    0.362726    0.163036    11.00000   -1.20000
H32B  2    0.639167    0.309314    0.204175    11.00000   -1.20000
H32C  2    0.761107    0.300517    0.167563    11.00000   -1.20000
AFIX   0
C33   1    0.958805    0.202836    0.490514    11.00000    0.03045    0.04111 =
         0.02680    0.00476   -0.00204   -0.00426
AFIX  13
H33   2    0.887267    0.174985    0.496001    11.00000   -1.20000
AFIX   0
C34   1    1.046851    0.172820    0.448086    11.00000    0.04633    0.04246 =
         0.04155    0.00760   -0.00105    0.00888
AFIX  33
H34A  2    1.073734    0.133482    0.463813    11.00000   -1.20000
H34B  2    1.119156    0.198857    0.443342    11.00000   -1.20000
H34C  2    1.003870    0.166958    0.410018    11.00000   -1.20000
AFIX   0
C35   1    1.027318    0.211527    0.550084    11.00000    0.04766    0.04895 =
         0.03165    0.00705   -0.01110    0.00004
AFIX  33
H35A  2    1.096614    0.239550    0.545701    11.00000   -1.20000
H35B  2    1.058774    0.172371    0.564290    11.00000   -1.20000
H35C  2    0.970216    0.228197    0.578214    11.00000   -1.20000
AFIX   0
C36   1    0.818681    0.321004    0.519128    11.00000    0.02645    0.04648 =
         0.02207   -0.00439   -0.00124   -0.00631
AFIX  13
H36   2    0.887446    0.333394    0.547037    11.00000   -1.20000
AFIX   0
C37   1    0.762816    0.380002    0.495880    11.00000    0.03396    0.04210 =
         0.04179   -0.00269    0.00270    0.00394
AFIX  33
H37A  2    0.740885    0.405802    0.528792    11.00000   -1.20000
H37B  2    0.688408    0.371131    0.471631    11.00000   -1.20000
H37C  2    0.823217    0.401027    0.472262    11.00000   -1.20000
AFIX   0
C38   1    0.726855    0.287392    0.556069    11.00000    0.04191    0.05595 =
         0.02957   -0.00231    0.01101   -0.00550
AFIX  33
H38A  2    0.759562    0.247141    0.565989    11.00000   -1.20000
H38B  2    0.648000    0.283182    0.533928    11.00000   -1.20000
H38C  2    0.713842    0.310198    0.592090    11.00000   -1.20000
AFIX   0
C39   1    0.719860    0.520871    0.084476    10.50000    0.04706
C40   1    0.728367    0.569794    0.122976    10.50000    0.04722
C41   1    0.806235    0.567029    0.171480    10.50000    0.05044
C42   1    0.884199    0.517296    0.183337    10.50000    0.05529
C43   1    0.874937    0.470997    0.141158    10.50000    0.06604
C44   1    0.800819    0.470086    0.104496    10.50000    0.03855
C45   1    0.643566    0.524741    0.038252    10.50000    0.06433
HKLF 4

REM  Pd4Si3(CNtBu)4
REM R1 =  0.0516 for   11907 Fo > 4sig(Fo)  and  0.0537 for all   12489 data
REM    470 parameters refined using      0 restraints

END

WGHT      0.0898     13.0213

REM No hydrogen bonds found for HTAB generation

REM Highest difference peak  2.305,  deepest hole -0.813,  1-sigma level  0.142
Q1    1   0.6949  0.5774  0.1027  11.00000  0.05    2.30
Q2    1   0.8362  0.5171  0.1567  11.00000  0.05    1.99
Q3    1   0.7396  0.4661  0.0718  11.00000  0.05    1.98
Q4    1   0.7523  0.4724  0.0829  11.00000  0.05    1.89
Q5    1   0.7750  0.5730  0.1459  11.00000  0.05    1.80
Q6    1   0.7582  0.5629  0.1398  11.00000  0.05    1.69
Q7    1   0.6635  0.5422  0.0636  11.00000  0.05    1.60
Q8    1   0.8180  0.4679  0.1250  11.00000  0.05    1.58
Q9    1   0.9321  0.5087  0.2080  11.00000  0.05    1.50
Q10   1   0.6524  0.4930  0.0315  11.00000  0.05    1.39
Q11   1   0.8376  0.5627  0.1863  11.00000  0.05    1.26
Q12   1   0.9073  0.4785  0.1521  11.00000  0.05    0.96
Q13   1   0.9807  0.1807  0.3778  11.00000  0.05    0.94
Q14   1   1.0861  0.1535  0.4788  11.00000  0.05    0.85
Q15   1   0.7491  0.5176  0.0958  11.00000  0.05    0.75
Q16   1   1.1005  0.2997  0.4723  11.00000  0.05    0.71
Q17   1   1.0713  0.1268  0.2845  11.00000  0.05    0.71
Q18   1   1.3217  0.5587  0.5322  11.00000  0.05    0.70
Q19   1   0.8268  0.5844  0.2276  11.00000  0.05    0.68
Q20   1   1.1904  0.2581  0.3825  11.00000  0.05    0.67
Q21   1   0.2870  0.2825  0.4893  11.00000  0.05    0.67
Q22   1   0.6804  0.2208  0.2744  11.00000  0.05    0.64
Q23   1   0.6264  0.5727  0.0285  11.00000  0.05    0.61
Q24   1   0.6666  0.4150  0.2684  11.00000  0.05    0.61
Q25   1   1.5419  0.3218  0.3607  11.00000  0.05    0.60
;

_shelx_res_checksum   17393

_shelx_hkl_file
;
   0   0  -4   37.73   10.38
   0   0   4   48.95    7.55
   0   0   4   38.97   10.82
   0   0  -4   17.36    9.23
   0   0  -4   31.83    9.00
   0   0   4   42.26    6.55
   0   0  -5   -1.69    4.17
   0   0   5    2.40    5.45
   0   0  -5   -7.78   11.67
   0   0   5   -7.25   11.56
   0   0  -5   11.54    7.19
   0   0   5   18.90    5.99
   0   0   6   30.10   11.71
   0   0  -6   14.68    5.94
   0   0  -6  102.94   22.31
   0   0   6   17.00   12.83
   0   0  -6   18.56    5.60
   0   0   6   11.47    5.23
   0   0  -7   -3.08    8.54
   0   0   7    4.24    4.01
   0   0  -7   -4.39   11.80
   0   0   7   28.24   12.41
   0   0  -7    4.69    5.17
   0   0   7    3.47    5.57
   0   0   828888.79  253.59
   0   0  -829159.49  256.00
   0   0  -830144.23  270.90
   0   0   829289.58  261.18
   0   0  -830318.39  263.06
   0   0   828973.00  251.27
   0   0   9   -3.62   10.36
   0   0  -9    9.40   10.02
   0   0  -9   25.71   10.14
   0   0   9   12.06    7.63
   0   0  -9  -10.84    9.25
   0   0   9    2.26    6.10
   0   0  10 2141.13   71.36
   0   0 -10 2112.06   59.90
   0   0 -10 1962.68   61.56
   0   0  10 1851.79   65.03
   0   0 -10 2057.38   59.63
   0   0  10 1975.46   55.36
   0   0  11   -0.53   15.31
   0   0 -11  -17.97   10.63
   0   0 -11   -8.26   15.44
   0   0  11    3.35    7.37
   0   0 -11   -7.94    9.23
   0   0  11   -2.28    9.51
   0   0  1259137.10 9138.17
   0   0 -1256267.94  658.10
   0   0 -1257236.21 8845.19
   0   0  1256725.25  671.62
   0   0 -1255205.00  641.98
   0   0  1258103.87 8978.72
   0   0  13   20.53   13.99
   0   0 -13   24.18    7.54
   0   0 -13  102.94   25.93
   0   0  14 2333.73   79.29
   0   0 -14 2150.89   72.92
   0   0 -14 2155.22   80.42
   0   0  14 2099.80   77.35
   0   0 -14 2321.92   95.35
   0   0  14 2269.66   77.18
   0   0  15   -2.02    6.05
   0   0 -15    7.44    4.63
   0   0 -15    7.97   10.76
   0   0  15   12.98   11.26
   0   0 -15    3.84    4.04
   0   0  15   11.81    4.57
   0   0  16  771.69   67.72
   0   0 -16  704.17   62.36
   0   0 -16  718.02   45.21
   0   0  16  734.86   59.02
   0   0  17   23.43    9.78
   0   0 -17   13.01   11.06
   0   0 -17   -2.11    9.11
   0   0  17   17.21    8.28
   0   0  18  111.13   18.03
   0   0 -18  157.67   27.68
   0   0 -18  142.89   23.31
   0   0  18   90.03   18.88
   0   0  19  -11.76   12.79
   0   0 -19   30.48    9.84
   0   0 -19   -0.45   11.04
   0   0  19   -2.74    8.15
   0   0  2016238.30   93.52
   0   0 -2014615.69  429.41
   0   0 -2016390.56   93.25
   0   0  2015756.15  435.78
   0   0 -21    6.76   36.47
   0   0  21   21.64   10.01
   0   0  22   19.01    9.48
   0   0 -22   29.19   11.86
   0   0 -22   14.67    8.80
   0   0  22    5.06    6.92
   0   0  23  -10.78   12.80
   0   0 -23   37.36   14.03
   0   0 -23    9.45    7.01
   0   0  24 2126.43   89.64
   0   0 -24 2124.91  165.32
   0   0 -24 2049.68   84.95
   0   0  25   47.40   19.99
   0   0 -25   24.91   14.44
   0   0 -25   22.08   13.05
   0   0  26 2510.71  118.84
   0   0 -26 2285.37  204.79
   0   0 -26 2325.66  102.09
   0   0  27   23.55   12.35
   0   0 -27   -9.10   19.30
   0   0  28 1213.80  106.68
   0   0 -28 1116.25  162.94
   0   0  29   19.66   10.99
   0   0 -29   -8.23   20.20
   0   1  -4  274.89   17.09
   0   1  -4  256.64   14.49
   0   1   4  239.75   13.01
   0   1   4  261.26   23.17
   0   1  -4  258.71   13.72
   0   1   4  239.51   12.78
   0  -1  -4  248.43   15.97
   0  -1   4  253.23   15.99
   0  -1   4  297.31   24.25
   0  -1   4  263.23   15.47
   0  -1  -4  246.65   16.65
   0  -1  -4  241.24   13.96
   0   1  -5  623.62   29.47
   0   1   5  637.92   25.34
   0   1  -5  668.90   25.18
   0   1   5  635.82   26.49
   0   1  -5  633.29   23.29
   0   1   5  664.73   28.59
   0  -1   5  699.34   33.14
   0  -1  -5  618.37   23.31
   0  -1   5  662.13   31.49
   0  -1   5  612.45   22.38
   0  -1  -5  688.49   29.32
   0  -1  -5  661.72   25.35
   0   1  -6 3655.97   78.93
   0   1  -6 3766.54   77.05
   0   1   6 3851.18   78.62
   0   1   6 3861.38   79.64
   0   1  -6 3811.10   78.03
   0   1   6 3793.00   80.91
   0  -1  -6 3734.74   79.95
   0  -1   6 3783.81   80.32
   0  -1   6 3739.63   80.68
   0  -1   6 3816.26   78.08
   0  -1  -6 3850.90   79.18
   0  -1  -6 3682.68   75.89
   0   1  -7   82.90   15.38
   0   1  -7   70.85   11.44
   0   1   7   69.67   18.63
   0   1   7   59.68   11.87
   0   1  -7   74.51   12.55
   0   1   7   98.56   17.58
   0  -1   7   44.38   13.14
   0  -1  -7   66.32   14.34
   0  -1   7   53.93   20.47
   0  -1   7   80.61   11.10
   0  -1  -7   58.52    9.78
   0  -1  -7   34.58   14.58
   0   1  -8   46.78   11.36
   0   1   8   72.88   12.98
   0   1  -8   97.25   15.16
   0   1   8   82.98   16.41
   0   1  -8   91.60   14.89
   0   1   8   55.09   16.56
   0  -1   8   87.76   18.67
   0  -1  -8   69.46   14.79
   0  -1   8   82.64   12.98
   0  -1   8   89.53   15.54
   0  -1  -8   68.15   10.38
   0  -1  -8   54.38   11.38
   0   1  -912338.96  129.20
   0   1  -912692.11  118.57
   0   1   912427.78  125.49
   0   1   912363.43  119.02
   0   1  -912143.28   57.73
   0  -1   912807.01  126.02
   0  -1  -912047.76   53.28
   0  -1  -912837.11  128.35
   0  -1   912485.49  117.34
   0   1 -1080300.94 2530.22
   0   1  1079025.34 2490.27
   0   1 -1082522.56 2599.60
   0  -1  1081254.46 2560.29
   0  -1  1079611.10 2511.40
   0  -1 -1081772.12 2576.51
   0  -1  1083630.57 2634.90
   0  -1 -1080927.88 2552.72
   0   1  11  240.15   36.88
   0   1  11  282.68   37.95
   0   1 -11  255.39   27.11
   0   1 -11  229.03   21.05
   0   1 -11  273.48   53.26
   0   1  11  204.77   17.43
   0  -1  11  241.43   19.72
   0  -1 -11  221.97   28.29
   0  -1 -11  303.22   35.06
   0  -1  11  221.09   18.86
   0  -1  11  247.79   14.22
   0   1  12   46.06    9.15
   0   1  12   66.08   10.59
   0   1 -12   69.25    9.59
   0   1 -12   63.48   12.53
   0   1  12   76.00   11.60
   0   1 -12   57.54    9.26
   0  -1 -12   72.11   17.92
   0  -1  12   29.83   11.88
   0  -1 -12   71.28   13.08
   0  -1  12   63.11   10.13
   0  -1 -12   67.89   11.27
   0   1 -13  426.81   60.75
   0   1  13  308.89   23.83
   0   1  13  373.75   25.90
   0   1 -13  380.76   36.00
   0   1 -13  343.90   26.21
   0   1  13  354.67   61.18
   0  -1 -13  422.64   59.80
   0  -1  13  305.29   17.85
   0  -1  13  401.69   32.63
   0  -1 -13  340.36   19.13
   0  -1  13  372.67   36.56
   0  -1 -13  349.77   18.42
   0   1  14 4573.35  110.88
   0   1  14 4689.78  112.66
   0   1 -14 4488.77  107.62
   0   1 -14 4448.22  111.26
   0   1  14 4644.97  115.55
   0   1 -14 4672.91  118.09
   0  -1  14 4488.50  110.79
   0  -1 -14 4798.95  121.71
   0  -1 -14 4559.90  117.03
   0  -1  14 4583.76  117.33
   0  -1  14 4593.86  107.86
   0   1  15  -12.06   11.62
   0   1 -15    9.13    7.73
   0   1  15   12.48    6.84
   0   1  15   10.30   10.55
   0   1 -15    7.39   10.28
   0   1 -15    3.83    2.80
   0  -1  15   -6.36   10.32
   0  -1 -15   -1.46   10.68
   0  -1  15   19.19   13.39
   0  -1 -15   41.92   10.83
   0  -1  15    1.69    5.62
   0  -1 -15    7.12    7.88
   0   1 -16 3994.51  131.95
   0   1  16 4188.95  131.00
   0   1 -16 3995.74  146.94
   0   1  16 3893.24  120.11
   0  -1  16 4066.12  135.81
   0  -1 -16 4020.26  135.46
   0  -1  16 4059.93  124.74
   0  -1 -16 3763.64  144.22
   0   1  17   21.70   13.91
   0   1 -17   39.57   12.91
   0   1  17   28.72    6.59
   0  -1  17   22.51    6.98
   0  -1 -17   44.85   11.42
   0  -1  17   33.44    8.73
   0  -1 -17   24.25    8.57
   0   1 -18 4840.06  179.79
   0   1 -18 4818.39  160.11
   0  -1  18 4191.48  135.45
   0  -1 -18 4573.06  155.54
   0  -1 -18 4817.86  162.63
   0  -1  18 4802.85  152.68
   0   1  19   48.94   22.83
   0   1 -19   55.51   18.36
   0   1 -19   41.35   16.16
   0   1  19   10.71    5.82
   0  -1 -19   -4.35   16.75
   0  -1  19   23.82   11.60
   0  -1  19   19.28    6.76
   0  -1 -19   24.19   14.31
   0   1 -20 1385.23   78.51
   0   1  20 1336.36   75.23
   0   1 -20 1505.85   92.97
   0   1  20 1300.91   72.43
   0  -1  20 1467.72  113.05
   0  -1 -20 1393.08   77.97
   0  -1  20 1408.70   76.13
   0  -1 -20 1514.67   90.43
   0   1  21 4844.47  182.66
   0   1 -21 4926.53  187.01
   0   1  21 4471.44  163.66
   0   1 -21 4262.90  155.78
   0  -1 -21 4659.67  182.14
   0  -1  21 4164.69  154.43
   0  -1 -21 4706.52  182.95
   0   1  22 8251.96  320.84
   0   1 -22 8473.35  336.18
   0   1 -22 8479.43  327.60
   0  -1 -22 8573.16  340.37
   0  -1 -22 8213.90  317.32
   0  -1  22 7414.37  286.79
   0   1  24 1905.18  134.08
   0   1 -24 1643.46  492.12
   0   1 -24 1875.54  157.76
   0  -1 -24 1979.29  188.87
   0  -1 -24 1631.23   59.02
   0  -1  24 1676.65   72.25
   0   1 -25  410.64   78.68
   0   1  25  390.64   50.61
   0  -1  25  371.38  156.41
   0  -1 -25  360.58  145.76
   0  -1 -25  236.59   60.32
   0   1  26 1135.90   33.46
   0   1 -26 1179.92   67.03
   0   1 -26 1113.66   36.92
   0  -1  26 1186.02   49.02
   0  -1 -26 1229.71   70.09
   0  -1 -26 1065.95   44.31
   0   1 -27   22.44   15.78
   0   1  27   20.56   11.47
   0  -1  27   29.63   16.60
   0  -1 -27   16.48   20.41
   0   1  28   12.71    7.07
   0   1 -28   -1.85   19.10
   0  -1  28   13.29   11.09
   0  -1 -28   32.63   20.44
   0  -1 -28   -0.46   10.87
   0   1  29  332.11   99.82
   0   1 -29  375.38   85.21
   0  -1  29  340.31   81.73
   0  -1 -29  386.27  105.34
   0   2  -3   23.43    5.21
   0   2   3   44.49    8.97
   0   2   3   26.22    7.72
   0   2  -3   27.46    7.26
   0   2   3   36.23    9.11
   0   2  -3   19.97    8.17
   0  -2  -3   31.47    8.03
   0  -2   3   18.18    8.01
   0  -2   3   25.44    7.59
   0  -2  -3   13.80    9.20
   0  -2   3   27.98    8.21
   0  -2  -3   34.94    9.28
   0   2  -4 3313.69   84.66
   0   2   4 3503.92   72.18
   0   2   4 3370.69   86.72
   0   2  -4 3443.46   72.06
   0   2  -4 3374.07   85.78
   0   2   4 3482.90   72.32
   0  -2   4 3398.60   88.53
   0  -2   4 3408.77   20.17
   0  -2  -4 3537.87   74.49
   0  -2   4 3449.80   70.73
   0  -2  -4 3454.74   79.18
   0  -2  -4 3269.94   83.89
   0   2  -5  111.52   11.98
   0   2  -5  137.02   18.70
   0   2   5  141.76   13.28
   0   2   5  137.55   12.38
   0   2  -5  154.43   28.68
   0  -2   5  119.46   10.34
   0  -2  -5  129.11   20.32
   0  -2  -5  144.95   30.81
   0  -2   5  106.78    7.31
   0  -2   5  127.61   16.31
   0  -2  -5  103.21    8.67
   0  -2  -5  100.53    9.06
   0   2  -6 1419.30   38.21
   0   2   6 1324.32   47.54
   0   2   6 1376.22   37.97
   0   2  -6 1444.93   39.64
   0   2  -6 1410.79   56.81
   0  -2   6 1319.98   46.45
   0  -2   6 1350.98   49.65
   0  -2  -6 1320.49   49.63
   0  -2  -6 1394.49   39.25
   0  -2   6 1361.92   47.00
   0  -2  -6 1408.98   39.46
   0  -2  -6 1344.47   47.55
   0   2  -7 1164.02   41.59
   0   2  -7 1132.11   41.14
   0   2   7 1221.25   55.64
   0   2   7 1115.62   40.81
   0   2  -7 1052.94   49.94
   0  -2   7 1090.16   39.95
   0  -2   7 1038.97   40.03
   0  -2  -7 1022.16   39.91
   0  -2  -7 1138.39   44.16
   0  -2   7 1079.86   38.18
   0  -2  -7 1116.57   41.38
   0  -2  -7  998.25   36.19
   0   2  -811451.93  181.76
   0   2  -811329.21  178.40
   0   2   810502.19  168.04
   0   2   811220.55  178.28
   0  -2   811306.92  179.76
   0  -2  -811433.01  184.70
   0  -2   811487.36  181.02
   0  -2  -810911.32  173.56
   0  -2  -811520.47  183.52
   0   2   9 6092.87  130.16
   0   2   9 6635.79  135.64
   0   2  -9 6365.56  139.72
   0   2  -9 6456.30  207.01
   0   2  -9 6546.75  212.30
   0  -2  -9 6038.44  129.34
   0  -2   9 6547.31  212.31
   0  -2  -9 6456.87  217.37
   0  -2   9 6358.55  134.70
   0  -2   9 6163.31  131.90
   0  -2  -9 6460.48  210.16
   0   2 -10 1378.21   52.98
   0   2  10 1598.36   60.41
   0   2 -10 1449.38   54.16
   0   2 -10 1267.66   45.76
   0   2  10 1316.37   47.90
   0  -2 -10 1475.12   73.53
   0  -2  10 1320.96   48.45
   0  -2 -10 1435.68   52.80
   0  -2  10 1533.91   55.58
   0  -2 -10 1539.14   60.82
   0  -2  10 1521.99   58.18
   0   2 -1134322.35  380.00
   0   2 -1133668.66  366.03
   0   2  1133229.49  360.93
   0   2  1134134.27  379.89
   0   2 -1133922.86  364.67
   0   2  1133014.01  358.10
   0  -2 -1134872.44  389.74
   0  -2  1134536.54  384.53
   0  -2  1134211.71  372.35
   0  -2  1134809.15  375.85
   0  -2 -1133278.13  366.30
   0  -2 -1133099.12  364.14
   0   2 -1219119.84  244.56
   0   2 -1219981.85  240.92
   0   2  1220428.02  246.81
   0   2  1219689.25  246.97
   0   2 -1218554.23  223.55
   0   2  1218717.79  226.81
   0  -2  1219323.15  240.46
   0  -2 -1219104.35  234.94
   0  -2  1219167.53  232.60
   0  -2 -1219946.77  242.59
   0  -2 -1219733.82  248.64
   0  -2  1219789.18  237.31
   0   2  13 2319.62   76.80
   0   2 -13 2266.41   75.77
   0   2 -13 2006.49   66.20
   0   2 -13 1974.58   68.69
   0  -2  13 2135.91   71.48
   0  -2 -13 2325.09   82.27
   0  -2 -13 2163.44   72.41
   0  -2 -13 2301.96   76.92
   0  -2  13 2156.85   75.12
   0   2  14  662.81  120.03
   0   2  14  597.93   27.34
   0   2 -14  547.67   29.46
   0   2 -14  642.78   32.34
   0   2 -14  554.52   25.89
   0  -2 -14  589.81   40.01
   0  -2 -14  605.42   36.96
   0  -2  14  567.38   45.02
   0  -2 -14  699.50  123.99
   0  -2  14  552.31   26.33
   0  -2  14  676.24  122.34
   0   2  15 3621.58  100.99
   0   2 -15 3705.75  113.63
   0   2  15 3861.39  107.72
   0   2 -15 3831.20  104.38
   0  -2 -15 3990.25  117.78
   0  -2  15 3899.82  108.11
   0  -2 -15 3884.87  129.55
   0   2  16 5018.66  154.56
   0   2 -16 4680.45  148.80
   0   2 -16 4920.97  150.61
   0  -2  16 5059.69  156.34
   0  -2 -16 4930.46  152.55
   0  -2  16 4854.34  148.32
   0  -2 -16 4977.04  176.62
   0   2  17  292.46   36.88
   0   2  17  227.41   35.78
   0   2 -17  242.72   41.27
   0   2 -17  228.61   24.57
   0  -2  17  241.12   32.99
   0  -2 -17  243.60   35.25
   0  -2  17  203.56   31.20
   0  -2 -17  240.84   34.46
   0   2  18  481.41   72.16
   0   2 -18  512.32   64.97
   0   2 -18  520.63   63.08
   0   2  18  391.11   64.73
   0  -2 -18  545.17   71.95
   0  -2  18  522.00   70.98
   0  -2  18  316.66   54.57
   0  -2 -18  534.30   68.68
   0   2  19 5962.07  173.04
   0   2 -19 6944.77  197.38
   0   2 -19 6638.48  194.11
   0   2  19 6570.00  186.67
   0  -2 -19 6498.22  192.28
   0  -2  19 6472.01  182.82
   0  -2 -19 7112.98  203.30
   0   2  20 2783.33  111.43
   0  -2 -20 2839.91  136.22
   0  -2  20 2502.24  102.36
   0   2  21   48.84   27.75
   0   2 -21   46.19   22.47
   0   2 -21   78.50   33.66
   0  -2 -21  101.25   36.29
   0  -2 -21   10.14   13.25
   0  -2  21   18.16   10.26
   0   2  22  163.75   31.69
   0   2 -22  157.09   33.56
   0   2 -22  163.09   26.80
   0  -2  22  169.05   30.64
   0  -2 -22  215.72   51.78
   0  -2 -22  152.95   31.02
   0  -2  22   92.30   28.43
   0   2 -23 1343.46   49.30
   0   2  23 1329.89   72.04
   0   2 -23 1354.23   87.96
   0  -2 -23 1396.39  109.50
   0  -2  23 1443.03   49.53
   0  -2 -23 1372.04  298.64
   0   2  24 1628.10   66.09
   0   2 -24 1573.36  178.55
   0   2 -24 1581.57   40.69
   0  -2  24 1669.41   74.69
   0  -2 -24 1625.87   79.38
   0  -2 -24 1474.54   45.70
   0   2  25  742.43   71.32
   0   2 -25  605.48   66.48
   0   2 -25  602.88  124.43
   0  -2 -25  859.69  105.34
   0  -2 -25  524.31   85.41
   0  -2  25  737.01  103.13
   0   2 -26  252.16   70.21
   0   2  26  310.42   51.71
   0   2 -26  382.05   48.17
   0  -2 -26  488.95   64.00
   0  -2  26  355.72   62.41
   0  -2 -26  304.88   65.26
   0   2 -27   60.13   20.16
   0   2  27   36.32   12.91
   0  -2  27   35.67   11.17
   0  -2 -27   67.26   17.32
   0  -2 -27   47.76   16.57
   0   2  28 1452.86   80.90
   0   2 -28 1514.02  146.58
   0  -2  28 1436.26  130.84
   0  -2 -28 1458.21  125.74
   0  -2 -28 1425.43   92.09
   0   2  29   28.64   13.73
   0   2 -29   25.00   15.59
   0  -2  29   14.79   13.00
   0  -2 -29   35.25   16.34
   0   3  -210850.98  168.11
   0   3  -211373.16  176.63
   0   3   211151.39  173.53
   0   3   211124.34  174.43
   0   3   210663.60  167.04
   0   3  -210909.13  170.87
   0  -3   210880.25  168.68
   0  -3  -210696.71  166.22
   0  -3   210652.18  165.64
   0  -3  -210614.15  166.23
   0  -3  -210798.85  169.72
   0  -3   210760.29  170.22
   0   3   3 8911.63  141.39
   0   3  -3 8598.36  134.16
   0   3   3 8766.42  138.79
   0   3   3 9133.99  144.03
   0   3  -3 8937.92  139.65
   0   3  -3 8938.27  142.04
   0  -3  -3 8789.58  137.77
   0  -3  -3 8900.75  141.58
   0  -3   3 9030.59  141.32
   0  -3   3 9050.21  141.58
   0  -3   3 8996.53  143.24
   0  -3  -3 9263.59  146.88
   0   3  -4  254.42   14.10
   0   3   4  320.02   24.60
   0   3   4  291.59   23.58
   0   3  -4  307.86   16.02
   0   3   4  276.21   16.71
   0   3  -4  290.15   21.47
   0  -3  -4  274.95   23.15
   0  -3   4  282.84   16.44
   0  -3   4  305.02   15.91
   0  -3  -4  280.79   16.42
   0  -3   4  292.79   15.08
   0  -3  -4  308.94   27.33
   0   3   5 3247.04   85.42
   0   3  -5 3140.06   80.72
   0   3   5 3102.55   81.03
   0   3  -5 3169.91   81.39
   0   3  -5 3074.75   81.73
   0   3   5 3145.23   82.17
   0  -3  -5 3284.06   85.25
   0  -3  -5 3110.14   81.11
   0  -3   5 3393.33   91.40
   0  -3   5 3181.57   82.04
   0  -3   5 3245.38   83.72
   0  -3  -5 3300.98   86.63
   0   3  -621700.08  189.30
   0   3  -621922.12  201.80
   0   3   621664.54  192.41
   0   3  -621982.69  190.63
   0  -3  -622966.57  202.67
   0  -3   622552.45  198.40
   0  -3   622276.77  200.46
   0  -3  -623153.30  203.75
   0  -3   622053.97  191.28
   0  -3  -621460.72  190.21
   0   3  -7 3720.08   78.04
   0   3   7 3832.27   79.94
   0   3  -7 4166.65   86.29
   0   3   7 4057.07   85.90
   0   3  -7 3904.79   83.92
   0  -3   7 3807.10   81.81
   0  -3   7 3905.52   80.69
   0  -3  -7 4048.08   84.73
   0  -3  -7 3846.92   80.62
   0  -3   7 3863.07   78.52
   0  -3  -7 3771.13   79.37
   0  -3  -7 3910.35   99.04
   0   3  -8 3797.95   82.95
   0   3   8 3755.25   79.13
   0   3   8 3937.22   82.99
   0   3  -8 3866.51   83.41
   0  -3   8 3760.44   78.28
   0  -3   8 3630.05   80.05
   0  -3  -8 3584.99   75.15
   0  -3  -8 3858.95   84.19
   0  -3   8 3820.95   79.43
   0  -3  -8 3777.49   83.68
   0  -3  -8 3678.35   81.69
   0   3  -925243.94  280.08
   0   3   925364.23  278.39
   0   3   925478.95  277.46
   0   3  -925705.39  276.63
   0  -3   924974.24  271.02
   0  -3   924413.21  270.74
   0  -3  -923824.91  260.27
   0  -3  -924826.60  275.82
   0  -3   924766.37  266.71
   0  -3  -925289.55  275.54
   0  -3  -924065.48  275.02
   0   3 -10 1100.29   41.47
   0   3  10 1079.25   42.58
   0   3 -10 1105.29   41.69
   0   3  10 1034.52   38.79
   0   3 -10 1107.78   47.81
   0  -3  10 1079.64   55.32
   0  -3  10 1152.03   46.40
   0  -3 -10  939.64   36.00
   0  -3 -10 1193.80   66.12
   0  -3  10 1134.38   44.95
   0  -3 -10  946.31   37.11
   0  -3 -10 1112.09   47.47
   0   3 -11 7194.60  146.40
   0   3  11 6641.27  137.50
   0   3 -11 6716.42  137.41
   0   3  11 6910.77  141.75
   0   3 -11 6797.85  144.03
   0  -3  11 6737.70  137.58
   0  -3  11 7066.05  148.53
   0  -3 -11 6464.48  208.26
   0  -3 -11 6962.63  145.47
   0  -3  11 6857.55  138.35
   0  -3 -11 7038.27  147.72
   0  -3 -11 6829.84  144.93
   0   3 -12  534.68   87.13
   0   3 -12  590.26   57.39
   0   3  12  509.04   20.33
   0   3  12  635.10   48.44
   0   3 -12  533.84   85.22
   0  -3  12  458.96   19.56
   0  -3 -12  623.10   49.14
   0  -3  12  616.80   32.79
   0  -3 -12  508.12   25.11
   0  -3  12  545.75   21.24
   0  -3 -12  581.67   26.48
   0  -3 -12  567.54   39.31
   0   3 -13 2838.00   96.92
   0   3  13 3034.91   99.94
   0   3 -13 2973.75  100.71
   0   3  13 2958.99   96.44
   0   3 -13 3047.69  102.35
   0  -3  13 2955.92   98.51
   0  -3  13 2893.22   97.93
   0  -3 -13 3287.67   88.54
   0  -3 -13 2970.96  107.09
   0  -3 -13 3067.44  100.93
   0  -3  13 3095.45  523.65
   0  -3 -13 3174.60   84.13
   0   3 -14 7396.91  140.79
   0   3  14 7447.65  141.10
   0   3  14 7605.16  147.31
   0   3 -14 7547.09  140.01
   0   3 -14 7489.05  146.87
   0  -3  14 7582.27  142.64
   0  -3 -14 7001.24  134.47
   0  -3 -14 7015.58  133.35
   0  -3 -14 7668.47  152.42
   0  -3  14 7588.79  140.98
   0  -3 -14 7655.38  152.86
   0   3 -15  679.98   37.02
   0   3 -15  663.20   46.49
   0   3 -15  745.68   90.15
   0   3  15  850.62   67.38
   0  -3  15  791.73   51.72
   0  -3 -15  704.10   39.74
   0  -3  15  734.47   45.44
   0  -3 -15  915.55   85.79
   0   3  16  162.69   17.45
   0   3  16  132.93   21.13
   0   3 -16  212.36   28.99
   0   3 -16  153.88   21.45
   0  -3  16  147.30   20.50
   0  -3 -16  190.77   22.98
   0  -3  16  137.97   16.83
   0  -3 -16  193.57   27.55
   0   3 -17   -3.77    7.60
   0   3  17   12.57    7.22
   0   3 -17   20.05    8.74
   0   3  17   -1.79    9.70
   0  -3 -17   35.25   15.89
   0  -3 -17   32.92   13.13
   0  -3  17   13.09    7.00
   0   3  18 1331.84   63.14
   0   3  18 1354.47   61.71
   0   3 -18 1488.41  119.56
   0   3 -18 1370.52   62.21
   0  -3  18 1454.88   98.93
   0  -3 -18 1467.18   97.24
   0  -3  18 1362.19   61.64
   0  -3 -18 1481.01   77.08
   0   3 -19  730.44   49.22
   0   3  19  764.44   72.03
   0   3 -19  711.01   62.73
   0   3  19  706.35   42.67
   0  -3  19  834.15   90.00
   0  -3 -19  792.52   58.91
   0  -3  19  718.76   45.96
   0  -3 -19  938.43   87.35
   0   3  20 4085.88  155.76
   0   3 -20 3384.94  136.56
   0   3 -20 4003.81  156.35
   0  -3 -20 4348.20  255.08
   0  -3 -20 3948.25  156.73
   0  -3  20 3753.04  145.73
   0   3  2113611.83 5234.22
   0   3 -2114594.12 5612.42
   0   3 -2114622.04 5621.84
   0  -3  21 8461.22  303.99
   0  -3 -2113460.49 5176.43
   0  -3 -2114107.18 5424.44
   0   3  22  529.20   28.01
   0   3 -22  784.50  134.34
   0   3 -22  949.95   70.39
   0   3  23  622.61   67.77
   0   3 -23  571.18   68.57
   0   3 -23  576.41   22.18
   0  -3  23  585.87   76.06
   0  -3 -23  720.25   84.73
   0  -3 -23  526.35   43.61
   0   3 -24   35.96   13.31
   0   3  24   -6.71   13.53
   0  -3  24   10.57   11.56
   0  -3 -24   47.85   14.11
   0  -3 -24    7.00   14.84
   0   3  25  221.96   32.92
   0   3 -25  200.84   37.32
   0   3 -25  161.73   30.41
   0  -3  25  208.08   30.08
   0  -3 -25  189.82   32.36
   0  -3 -25  192.84   23.94
   0   3  26 1676.65   65.70
   0   3 -26 1186.44  192.99
   0   3 -26 1465.59   55.71
   0  -3  26 1589.49   65.27
   0  -3 -26 1424.87   95.94
   0  -3 -26 1502.37   68.03
   0   3  27  545.41   90.48
   0   3 -27  424.44   82.21
   0  -3  27  576.56   80.03
   0  -3 -27  484.17   86.38
   0  -3 -27  542.03   57.13
   0   3 -28  310.43   56.19
   0   3  28  370.98   79.79
   0  -3  28  378.57   71.24
   0  -3 -28  411.57   66.64
   0  -3 -28  199.20   68.33
   0   3  29 1639.53   99.80
   0   3 -29 1407.39  150.25
   0  -3  29 1429.00   97.32
   0  -3 -29 1303.80  157.12
   0   4   0  706.12   26.42
   0   4   0  628.70   26.25
   0   4   0  718.19   27.57
   0  -4   0  766.13   30.48
   0  -4   0  669.48   28.24
   0  -4   0  760.82   30.60
   0   4   1 4503.94   89.81
   0   4  -1 4301.98   85.92
   0   4  -1 4403.07   89.78
   0   4   1 4537.79   92.53
   0  -4  -1 4263.09   85.06
   0  -4   1 4423.26   87.86
   0  -4  -1 4422.33   89.70
   0  -4   1 4295.87   86.27
   0  -4  -1 4416.59   89.97
   0  -4   1 4291.17   87.40
   0   4  -2 1683.38   43.75
   0   4   2 1835.16   48.71
   0   4   2 1842.24   49.68
   0   4  -2 1898.72   49.88
   0   4   2 1932.59   51.91
   0   4  -2 1850.72   50.13
   0  -4  -2 1961.69   51.49
   0  -4  -2 1870.49   50.46
   0  -4   2 1862.26   49.11
   0  -4  -2 1791.31   48.39
   0  -4   2 1880.76   54.79
   0   4   317313.09  151.90
   0   4   317588.28  157.32
   0   4   316725.65  149.13
   0   4  -316540.92  149.35
   0   4  -317432.05  152.07
   0  -4   316927.02  147.96
   0  -4  -316921.66  150.20
   0  -4   317281.61  154.25
   0  -4   317426.22  151.84
   0  -4  -316669.15  149.66
   0  -4  -316730.98  146.68
   0   4   441932.24  359.82
   0   4  -442004.26  355.66
   0   4   441183.47  353.32
   0   4   443273.08  368.42
   0   4  -442305.47  358.90
   0   4  -443618.53  376.11
   0  -4  -442497.17  364.19
   0  -4   442726.58  369.31
   0  -4   442537.68  360.82
   0  -4   442297.67  358.64
   0  -4  -440789.59  350.19
   0  -4  -441830.17  356.53
   0   4  -5 5945.74  118.49
   0   4  -5 6482.41  128.88
   0   4   5 5936.02  119.12
   0   4  -5 6174.38  129.51
   0   4   5 6187.23  125.92
   0   4   5 6151.43  124.37
   0  -4   5 5859.92  119.45
   0  -4   5 6133.66  122.26
   0  -4   5 6058.01  120.62
   0  -4  -5 6107.30  123.37
   0  -4  -5 6255.94  127.37
   0  -4  -5 6071.18  121.76
   0   4   6   15.01    9.81
   0   4  -6    0.70    2.97
   0   4   6   -3.25    9.81
   0   4  -6   -0.49    5.28
   0   4  -6    6.75    7.10
   0   4   6    4.05    4.12
   0  -4  -6   12.81    4.24
   0  -4  -6   20.49    6.54
   0  -4   6    7.04    9.65
   0  -4   6   11.78    6.65
   0  -4   6   14.39    7.44
   0  -4  -6   14.42    6.88
   0   4   7   -0.96    8.89
   0   4  -7   -5.26    6.32
   0   4   7   -1.61    9.63
   0   4   7    5.97    7.18
   0   4  -7   10.26    7.54
   0   4  -7    3.57    7.59
   0  -4  -7  -14.50   11.49
   0  -4  -7   -1.86    7.24
   0  -4   7   14.79    6.14
   0  -4   7    6.03    4.86
   0  -4  -7   -6.64   10.11
   0  -4   7   16.24   12.90
   0   4  -8  108.69   17.89
   0   4  -8  107.42   14.07
   0   4   8  113.46   17.83
   0   4   8   93.60   17.86
   0   4  -8  118.88   19.17
   0  -4   8  105.21   12.67
   0  -4   8  134.25   21.18
   0  -4  -8  103.98   13.41
   0  -4  -8   97.96   12.73
   0  -4   8   86.16    7.92
   0  -4  -8   95.26   16.34
   0  -4  -8   42.43   11.97
   0   4  -9 5600.21  119.96
   0   4  -9 5537.60  119.30
   0   4   9 5518.35  119.59
   0   4  -9 5383.82  121.64
   0   4   9 5474.08  118.88
   0  -4  -9 5758.34  124.85
   0  -4   9 5511.23  119.90
   0  -4  -9 5455.16  124.52
   0  -4  -9 5678.27  124.43
   0  -4   9 5485.94  116.95
   0  -4   9 5415.74  119.57
   0   4 -10 5337.96  119.18
   0   4  10 5314.00  117.20
   0   4 -10 5324.38  115.46
   0   4  10 5333.70  116.48
   0   4 -10 5448.15  123.59
   0  -4  10 5415.11  119.28
   0  -4  10 5230.00  117.29
   0  -4 -10 5653.49  123.53
   0  -4 -10 5334.23  118.38
   0  -4  10 5446.26  116.80
   0  -4 -10 5177.60  114.58
   0  -4 -10 5356.33  125.02
   0   4 -1112358.37  151.27
   0   4  1112892.48  164.92
   0   4 -1112605.45  155.99
   0   4  1112648.55  158.05
   0   4 -1112467.26  168.66
   0  -4  1111887.29  155.86
   0  -4  1112771.67  159.09
   0  -4 -1112792.45  170.39
   0  -4 -1112635.56  162.46
   0  -4  1112553.20  153.71
   0  -4 -1112729.61  164.05
   0  -4 -1111975.55  166.08
   0   4 -12  125.41   17.16
   0   4  12  112.33   18.60
   0   4 -12  113.94   15.88
   0   4  12  123.12   16.42
   0   4 -12  145.59   23.34
   0  -4  12  145.56   22.03
   0  -4  12  138.20   25.72
   0  -4 -12   84.41   12.06
   0  -4 -12  111.18   14.04
   0  -4  12  121.43   19.24
   0  -4 -12  135.10   20.34
   0  -4 -12  148.25   25.43
   0   4 -13  371.71   20.58
   0   4 -13  388.68   40.98
   0   4  13  429.09   55.32
   0   4  13  357.89   24.57
   0   4 -13  459.97   62.44
   0  -4  13  354.80   22.32
   0  -4  13  429.16   63.59
   0  -4 -13  424.88   42.62
   0  -4 -13  339.16   33.44
   0  -4  13  378.47   18.53
   0  -4 -13  391.97   25.07
   0  -4 -13  468.75   61.87
   0   4 -14    6.31    4.18
   0   4  14   24.26   11.78
   0   4 -14   11.04    6.32
   0   4  14    6.01    3.36
   0   4 -14   37.27   12.32
   0  -4  14   13.46    5.86
   0  -4  14   16.59    6.79
   0  -4 -14    7.33   10.86
   0  -4 -14    6.88    6.01
   0  -4  14   12.94    5.22
   0  -4 -14    5.39    6.27
   0  -4 -14    1.83   10.80
   0   4  15  334.40   23.66
   0   4  15  410.58   60.51
   0   4 -15  268.72   32.63
   0   4 -15  409.33   57.58
   0   4 -15  299.41   17.77
   0  -4  15  341.56   27.21
   0  -4 -15  293.47   18.22
   0  -4  15  358.79   33.11
   0  -4 -15  354.32   48.65
   0   4 -16 4713.64  144.41
   0   4  16 4399.49  137.47
   0   4 -16 4818.04  160.52
   0   4  16 4500.27  140.13
   0  -4  16 4390.99  136.93
   0  -4 -16 4690.03  154.49
   0  -4  16 4427.88  137.88
   0  -4 -16 4750.29  153.98
   0   4 -17 2093.39   79.75
   0   4  17 2072.51   83.07
   0   4 -17 1929.81   86.79
   0   4  17 2008.56   78.80
   0  -4  17 2080.80   81.47
   0  -4 -17 2027.92  112.09
   0  -4  17 2082.24   85.54
   0  -4 -17 2102.10   88.60
   0   4  18 2994.53  116.03
   0   4 -18 3130.46  108.38
   0   4 -18 3119.94  100.82
   0  -4  18 3100.89  102.36
   0  -4 -18 3263.15  110.22
   0  -4  18 3160.74  102.19
   0  -4 -18 3411.59  129.81
   0   4 -19 1754.90   87.18
   0   4  19 1919.54   84.77
   0   4 -19 1980.98  159.68
   0   4  19 1653.71   89.03
   0  -4  19 1800.73   81.13
   0  -4 -19 1860.41   83.46
   0  -4  19 1713.71   38.48
   0  -4 -19 1830.04   97.01
   0   4 -20 1050.55   58.33
   0   4  20 1109.81   77.28
   0   4 -20 1205.71   84.39
   0  -4 -20 1383.61  155.15
   0  -4  20 1099.64   73.85
   0  -4 -20 1086.36   68.59
   0  -4  20 1019.84   62.49
   0   4 -21  312.27   51.63
   0   4  21  385.81   56.22
   0   4 -21  399.61   47.24
   0  -4 -21  432.06   47.93
   0  -4  21  331.78   45.27
   0  -4 -21  320.42   51.11
   0   4 -22 3603.05  143.53
   0   4  22 3779.88  154.41
   0   4 -22 3684.06  173.75
   0  -4 -22 3668.59  177.60
   0  -4  22 3630.64  150.49
   0  -4 -22 3725.54  153.64
   0   4  23 1781.32   93.72
   0   4 -23 1735.92   80.46
   0   4 -23 1805.63   78.43
   0  -4  23 1764.22  387.68
   0  -4 -23 1566.19   80.69
   0   4  24 1097.71  131.88
   0   4 -24 1123.62   59.22
   0   4 -24  916.50   37.85
   0  -4  24 1042.15   78.77
   0  -4 -24 1008.18   97.96
   0  -4 -24 1061.97   35.83
   0   4 -25  639.33   75.47
   0   4  25  819.71   58.32
   0   4 -25  819.56  121.20
   0  -4 -25  936.87  147.48
   0  -4  25  726.82   99.42
   0  -4 -25  717.14   68.03
   0   4  26   27.67   11.79
   0   4 -26   34.85   18.69
   0  -4  26   -8.06   13.60
   0  -4 -26  -19.93   22.41
   0   4  27   64.72   16.43
   0   4 -27   -1.02   19.88
   0  -4  27   86.18   14.73
   0  -4 -27   30.60   15.15
   0  -4 -27   70.68   13.49
   0   4 -28  116.54   24.42
   0   4  28  149.27   34.19
   0  -4  28  126.44   32.11
   0  -4 -28   91.39   21.32
   0  -4 -28   75.54   17.18
   0   4  29   31.30   11.51
   0   4 -29   33.36   12.49
   0  -4  29    8.86   14.38
   0  -4 -29   43.40   17.33
   0   5   0    7.74    9.11
   0   5   0   11.35    7.46
   0  -5   0   14.72    5.33
   0  -5   0   18.77   11.56
   0  -5   0   14.62   10.19
   0   5   1   18.40    7.37
   0   5   1   38.75   13.98
   0   5  -1    8.74    7.59
   0   5  -1   17.36    9.48
   0   5   1   30.77   11.94
   0  -5  -1    7.88    4.91
   0  -5   1   23.14    7.94
   0  -5   1    3.12    5.32
   0  -5   1    6.51    4.72
   0  -5  -1   25.99   10.07
   0  -5  -1   23.46    7.35
   0  -5   1   11.26    9.07
   0   5  -2 1891.28   48.73
   0   5   2 1899.07   51.76
   0   5   2 1893.52   52.17
   0   5  -2 1954.92   51.66
   0   5   2 1985.69   56.85
   0   5  -2 1874.20   51.76
   0  -5  -2 1928.82   50.98
   0  -5   2 1854.18   50.40
   0  -5   2 1938.94   51.38
   0  -5  -2 1931.80   52.11
   0  -5  -2 1741.80   48.45
   0  -5   2 1987.80   54.13
   0   5   3  487.39   23.38
   0   5  -3  465.26   18.00
   0   5   3  468.59   18.58
   0   5  -3  501.12   22.57
   0   5  -3  429.27   19.82
   0   5   3  491.30   21.77
   0  -5  -3  485.77   18.96
   0  -5  -3  429.72   18.88
   0  -5   3  465.14   20.18
   0  -5  -3  464.45   33.10
   0  -5   3  479.61   19.19
   0   5   4   14.21    8.29
   0   5  -4   20.62    7.77
   0   5   4   35.05   10.95
   0   5   4   15.05    9.03
   0   5  -4   17.34    5.29
   0   5  -4   -4.17   12.37
   0  -5  -4   24.60   12.57
   0  -5  -4    9.47    8.49
   0  -5   4   11.40    6.87
   0  -5   4   17.94    5.35
   0  -5  -4   38.87   12.14
   0  -5   4   26.97   10.74
   0   5  -511684.29   38.06
   0   5   511265.99  179.84
   0   5   511733.11   62.72
   0   5  -511962.91   55.12
   0  -5  -511799.20   46.05
   0  -5   511601.30   56.98
   0  -5   511756.87   41.42
   0  -5  -511801.63   50.82
   0  -5  -511880.48   55.15
   0   5   617434.36  159.44
   0   5  -617964.10  165.13
   0   5   617883.41  167.30
   0   5  -617524.74  156.16
   0  -5  -617774.99  161.55
   0  -5  -617584.56  157.97
   0  -5   618164.17  162.22
   0  -5   617019.93  151.53
   0  -5   617305.40  160.54
   0  -5  -618048.44  164.76
   0   5  -711135.63  176.11
   0   5   711191.76  179.74
   0   5   711556.16  183.74
   0   5   710995.41  177.54
   0   5  -711634.92   47.03
   0   5  -711262.73  183.19
   0  -5  -711404.83  182.20
   0  -5   711684.67   61.85
   0  -5  -711278.86  182.07
   0  -5   711783.68   44.66
   0  -5   711289.40  178.43
   0  -5  -711557.92  189.69
   0   5  -8 2052.34   56.15
   0   5   8 2122.81   59.82
   0   5   8 2075.17   58.72
   0   5   8 2078.39   72.43
   0   5  -8 2126.07   68.27
   0   5  -8 2137.71   58.22
   0  -5   8 2197.93   63.74
   0  -5  -8 2139.07   61.24
   0  -5  -8 2265.60   67.25
   0  -5   8 2113.94   58.23
   0  -5  -8 2079.59   61.21
   0  -5   8 2052.58   59.26
   0   5  -9    3.19    5.93
   0   5   9   -0.34    5.00
   0   5  -9   11.04    4.94
   0   5   9    4.17    7.40
   0   5  -9   22.20   11.63
   0  -5   9   25.09    7.58
   0  -5   9   11.44   14.15
   0  -5  -9   12.30    6.46
   0  -5  -9   12.80   10.49
   0  -5   9   -3.26    5.07
   0  -5  -9   15.77   13.52
   0  -5  -9   -3.30   17.41
   0   5 -10 8809.89  177.16
   0   5  10 8666.60  175.16
   0   5 -10 8546.68  171.60
   0   5  10 8736.80  177.42
   0   5 -10 8439.57  174.21
   0  -5  10 8862.63  178.15
   0  -5  10 8391.02  173.18
   0  -5 -10 8708.26  177.05
   0  -5 -10 8763.58  181.18
   0  -5  10 8232.02  170.81
   0  -5 -10 8549.10  177.66
   0  -5 -10 8877.31  187.47
   0   5 -11  992.51   35.59
   0   5 -11 1061.56   47.44
   0   5  11  998.13   38.50
   0   5  11 1033.21   48.64
   0   5 -11  970.06   44.20
   0  -5  11  935.09   36.56
   0  -5  11  989.72   49.26
   0  -5 -11 1003.34   37.56
   0  -5 -11 1020.09   50.68
   0  -5  11 1019.10   37.00
   0  -5 -11  974.35   37.01
   0  -5 -11  966.08   40.59
   0   5 -12 2457.07   73.81
   0   5  12 2595.16   79.55
   0   5 -12 2671.60   74.32
   0   5  12 2850.71   77.15
   0   5 -12 2511.43   92.10
   0  -5  12 2692.33   68.05
   0  -5  12 2624.61  407.48
   0  -5 -12 2730.65   70.42
   0  -5 -12 2694.22   69.54
   0  -5  12 2676.83   68.78
   0  -5 -12 2552.37   78.74
   0  -5 -12 2549.29   91.96
   0   5 -13 2179.81   77.19
   0   5  13 2309.41   83.70
   0   5 -13 2317.33   82.75
   0   5  13 2367.17   78.72
   0   5 -13 2121.98   74.82
   0  -5  13 2233.62   80.93
   0  -5  13 2093.97   87.16
   0  -5 -13 2320.96   79.98
   0  -5 -13 2205.34   84.10
   0  -5  13 2278.38   74.40
   0  -5 -13 2222.86   90.91
   0  -5 -13 2324.38   87.54
   0   5  14 4897.13  133.28
   0   5 -14 4669.76  127.19
   0   5  14 4971.71  135.56
   0   5 -14 4635.83  130.05
   0   5 -14 4707.38  126.68
   0  -5  14 4666.38  132.54
   0  -5 -14 4767.96  135.57
   0  -5  14 4710.12  125.87
   0  -5 -14 4980.20  136.56
   0  -5  14 4872.44  131.41
   0   5  15  397.31   49.97
   0   5 -15  316.19   37.74
   0   5  15  457.78   64.51
   0   5 -15  438.53  102.27
   0   5 -15  359.70   19.91
   0  -5  15  410.85   50.36
   0  -5  15  394.48   24.52
   0  -5 -15  449.42   61.64
   0  -5 -15  444.02   57.97
   0   5 -16  283.59   34.70
   0   5  16  300.76   44.70
   0   5 -16  381.04   41.06
   0   5  16  244.64   32.03
   0  -5  16  286.08   37.03
   0  -5  16  256.97   34.93
   0  -5 -16  309.15   35.12
   0  -5 -16  350.18   35.26
   0   5 -17  263.34   31.67
   0   5  17  203.20   33.36
   0   5 -17  211.21   30.29
   0   5  17  126.89   30.64
   0  -5  17  232.63   33.82
   0  -5 -17  188.77   28.66
   0  -5  17  164.40   30.70
   0  -5 -17  219.54   32.38
   0   5  18  402.06   64.22
   0   5  18  265.24   51.91
   0   5 -18  394.72   49.35
   0   5 -18  321.77   46.55
   0  -5  18  408.98   61.49
   0  -5 -18  389.25   56.02
   0  -5  18  289.85   49.63
   0  -5 -18  397.47   60.08
   0   5  19 1243.50   70.56
   0   5 -19 1162.72   74.02
   0   5 -19 1109.68   66.09
   0  -5  19 1225.28   72.92
   0  -5 -19 1315.95  102.69
   0  -5 -19 1285.60  109.01
   0  -5  19 1112.89   65.12
   0   5  20 9132.22  297.70
   0   5 -20 9745.93  317.37
   0  -5  20 9109.36  296.41
   0  -5 -20 9346.79  310.71
   0  -5 -20 9653.85  324.72
   0  -5  20 8430.18  275.42
   0   5 -21   14.81    8.89
   0  -5 -21   79.55   24.77
   0  -5 -21   24.36   13.76
   0  -5  21   13.73    7.22
   0   5  22   19.84   14.44
   0   5 -22   42.97   23.15
   0   5 -22   46.97   15.01
   0  -5  22   52.13   13.82
   0  -5 -22   46.24   16.53
   0  -5 -22    2.19   11.28
   0   5 -23   14.11    7.43
   0   5  23    9.56    8.75
   0   5 -23   70.72   18.25
   0  -5 -23   65.75   20.56
   0  -5  23   23.03    9.67
   0  -5 -23   36.38   15.97
   0   5 -24   25.27    7.60
   0   5  24   41.27   14.83
   0   5 -24   66.63   23.18
   0  -5 -24   29.84   22.32
   0  -5  24   67.93   18.63
   0  -5 -24   42.44   11.35
   0   5 -25  535.68   27.59
   0   5  25  658.24  100.27
   0   5 -25  608.99   93.36
   0  -5 -25  601.63   84.39
   0  -5  25  627.79   86.96
   0  -5 -25  561.86   79.04
   0   5 -26  209.94   36.09
   0   5  26  235.16   33.24
   0  -5  26  205.19   34.95
   0  -5 -26  232.37   32.09
   0  -5 -26  165.59   29.69
   0   5  27 1507.10   89.09
   0   5 -27 1187.67  150.71
   0  -5  27 1376.32  544.27
   0  -5 -27 1190.30  157.96
   0  -5 -27 1340.00  110.65
   0   5 -28  316.30   80.46
   0   5  28  388.60  105.95
   0  -5  28  447.56   83.88
   0  -5 -28  433.73  133.95
   0  -5 -28  123.78   62.78
   0   5 -29  100.27   27.15
   0   5  29   71.11   24.30
   0  -5  29   58.92   17.16
   0  -5 -29  121.96   31.46
   0  -5 -29   54.04   15.80
   0   6   0 9041.47  142.29
   0   6   0 9141.70  147.40
   0  -6   0 8685.04  136.72
   0  -6   0 8831.55  143.26
   0  -6   0 8391.86  135.20
   0   6   1 4673.34   94.07
   0   6  -1 4751.88   97.90
   0   6  -1 4702.53   94.44
   0   6   1 4653.48   96.17
   0  -6  -1 4667.91   95.95
   0  -6   1 4797.97   96.46
   0  -6   1 4703.29   95.86
   0  -6   1 4706.39   98.31
   0  -6  -1 4925.73  101.54
   0  -6  -1 4734.81   97.37
   0   6  -2 6805.18  134.06
   0   6   2 6802.70  136.49
   0   6   2 6706.57  136.04
   0   6  -2 6883.68  136.54
   0   6  -2 7192.38  118.81
   0  -6  -2 6929.11   30.21
   0  -6   2 6699.05  135.38
   0  -6  -2 6808.39  138.20
   0  -6   2 6812.63  138.07
   0  -6  -2 7044.47   42.10
   0  -6   2 7068.93   53.52
   0   6  -3 8665.76  136.78
   0   6   3 8614.47  136.55
   0   6   3 8491.49  137.66
   0   6  -3 8736.25  138.43
   0   6   3 8747.31  140.96
   0   6  -3 8524.48  138.39
   0   6  -3 8709.09  141.29
   0  -6  -3 8274.69  133.92
   0  -6   3 8923.34  149.36
   0  -6   3 8490.70  137.61
   0  -6  -3 8439.98  140.75
   0  -6  -3 8698.94  138.52
   0   6  -4 6931.18   34.93
   0   6  -4 6725.25  133.62
   0   6   4 6889.06  140.84
   0   6   4 7100.97   42.89
   0   6  -4 6696.25  136.54
   0   6   4 6858.93  140.19
   0  -6   4 6748.91  134.16
   0  -6  -4 6566.15  131.18
   0  -6  -4 6541.98  133.08
   0  -6   4 6538.09  130.67
   0  -6  -4 6670.54  135.56
   0  -6   4 6804.92  138.81
   0   6   5 9036.90  153.64
   0   6  -5 8829.85  141.21
   0   6   5 9347.82  149.00
   0   6   5 8988.85  145.67
   0   6  -5 9077.58  144.73
   0   6  -5 8726.04  142.94
   0  -6  -5 8946.21  145.43
   0  -6  -5 8654.30  137.94
   0  -6   5 9133.25  146.02
   0  -6   5 8997.50  143.41
   0  -6  -5 9122.97  150.63
   0  -6   5 8851.89  149.31
   0   6   6 1180.82   44.46
   0   6  -6 1198.16   43.99
   0   6   6 1114.03   40.69
   0   6  -6 1202.75   45.99
   0   6  -6 1178.71   42.52
   0   6   6 1140.26   42.72
   0  -6  -6 1109.59   41.67
   0  -6  -6 1139.21   41.18
   0  -6   6 1281.27   45.47
   0  -6   6 1144.27   42.30
   0  -6   6 1179.38   44.61
   0  -6  -6 1070.43   41.20
   0   6   7  174.83   24.02
   0   6  -7  188.97   15.26
   0   6   7  173.14   26.39
   0   6  -7  189.73   22.76
   0   6  -7  233.75   40.60
   0   6   7  201.91   33.01
   0  -6  -7  234.80   30.85
   0  -6  -7  183.02   27.33
   0  -6   7  248.44   37.81
   0  -6   7  145.91   11.51
   0  -6   7  171.24   16.61
   0  -6  -7  164.19   17.79
   0   6   8 1572.83   58.93
   0   6  -8 1591.02   57.88
   0   6   8 1608.39   60.24
   0   6   8 1557.75   58.06
   0   6  -8 1661.11   59.38
   0   6  -8 1564.92   65.59
   0  -6  -8 1632.68   62.90
   0  -6  -8 1607.05   58.51
   0  -6   8 1522.42   55.05
   0  -6   8 1659.74   59.08
   0  -6  -8 1782.14   66.62
   0  -6   8 1624.66   60.80
   0   6  -9   10.80    4.34
   0   6   9   -2.41    9.70
   0   6   9    5.73    7.54
   0   6   9   14.82    5.03
   0   6  -9    8.40    4.54
   0   6  -9   26.95   11.20
   0  -6   9   -1.49    7.36
   0  -6  -9    6.48    8.11
   0  -6  -9   -1.23    8.65
   0  -6   9   -0.05    6.55
   0  -6  -9    5.33    9.70
   0  -6   9    5.75    5.41
   0   6 -10 2455.02   79.19
   0   6  10 2416.62   74.29
   0   6  10 2365.57   73.44
   0   6 -10 2421.17   78.82
   0   6 -10 2207.03   77.69
   0  -6  10 2394.63   77.01
   0  -6 -10 2357.17   83.11
   0  -6 -10 2348.43   72.30
   0  -6  10 2288.98   69.49
   0  -6 -10 2240.50   70.20
   0  -6  10 2431.84   76.72
   0   6 -11  800.31   30.26
   0   6  11  743.03   31.88
   0   6 -11  844.58   55.57
   0   6  11  783.22   52.11
   0   6 -11  730.88   32.34
   0  -6  11  797.05   33.58
   0  -6  11  706.70   32.33
   0  -6 -11  718.29   29.10
   0  -6 -11  840.18   76.06
   0  -6  11  769.28   28.76
   0  -6 -11  713.12   29.77
   0  -6 -11  827.23   39.60
   0   6 -12  493.88   24.21
   0   6 -12  503.57   31.92
   0   6  12  433.52   22.96
   0   6  12  510.20   50.93
   0   6 -12  563.60   73.59
   0  -6  12  455.29   23.05
   0  -6  12  497.89   27.76
   0  -6 -12  439.64   34.82
   0  -6 -12  455.43   44.23
   0  -6  12  462.46   21.22
   0  -6 -12  464.03   35.27
   0  -6 -12  511.87   64.51
   0   6 -13  353.88   36.34
   0   6  13  381.95   53.09
   0   6 -13  342.44   35.76
   0   6  13  267.38   19.70
   0   6 -13  299.50   34.33
   0  -6  13  367.38   50.11
   0  -6  13  302.15   43.68
   0  -6 -13  295.55   34.92
   0  -6 -13  269.34   51.67
   0  -6  13  284.07   16.07
   0  -6 -13  352.72   45.19
   0  -6 -13  393.82   56.39
   0   6  14 1018.36   80.20
   0   6  14 1021.64   47.30
   0   6 -14  843.38   55.82
   0   6 -14 1011.63   68.02
   0   6 -14  835.54   45.47
   0  -6 -14  865.79   48.78
   0  -6 -14  875.70   54.73
   0  -6  14  925.29   50.30
   0  -6 -14  986.59   60.94
   0  -6  14  831.89   44.66
   0   6 -15 6668.85  134.22
   0   6  15 6799.58  139.87
   0   6 -15 6341.18  139.04
   0   6  15 6652.91  136.74
   0  -6  15 6749.91  143.00
   0  -6  15 6062.46  123.15
   0  -6 -15 6657.17  138.74
   0  -6 -15 6833.44  150.98
   0   6 -16  660.31   53.75
   0   6  16  754.58   68.68
   0   6 -16  702.63   70.71
   0   6  16  711.91   60.33
   0  -6  16  693.21   58.86
   0  -6  16  614.94   50.61
   0  -6 -16  741.62   61.13
   0  -6 -16  834.60   95.78
   0   6  17  367.91   62.31
   0   6 -17  371.19   51.77
   0   6 -17  351.21   55.31
   0   6  17  278.91   49.49
   0  -6  17  425.08   59.79
   0  -6 -17  309.59   50.51
   0  -6 -17  408.76   57.31
   0   6  18  127.02   24.17
   0   6 -18  101.02   23.80
   0   6 -18   97.05   19.27
   0  -6  18  141.78   24.27
   0  -6 -18  104.42   25.74
   0  -6 -18  160.12   28.29
   0  -6  18   83.39   17.21
   0   6 -19 2596.30   92.58
   0   6  19 2640.86   96.94
   0   6 -19 2733.16  165.00
   0  -6 -19 2819.41  106.57
   0  -6  19 2694.29   95.93
   0  -6 -19 2657.02   96.22
   0  -6  19 2535.61   87.56
   0   6 -20 1039.83   63.74
   0   6  20 1117.27   76.00
   0   6 -20 1265.62  106.21
   0  -6 -20 1294.20  123.82
   0  -6  20 1121.14   69.57
   0  -6 -20 1173.08   78.01
   0  -6  20 1082.74   63.46
   0   6  21  196.13   82.75
   0   6 -21  169.53   34.46
   0   6 -21  174.11   36.27
   0  -6  21  208.78   33.11
   0  -6 -21  199.80   41.04
   0  -6 -21  182.80   39.67
   0  -6  21  100.48   29.12
   0   6  22 2491.66  540.04
   0   6 -22 2412.37  111.36
   0   6 -22 2434.76  527.53
   0  -6  22 2438.44  531.05
   0  -6 -22 2400.41  186.93
   0  -6 -22 2287.32   99.12
   0   6 -23  282.76   43.26
   0   6  23  274.32   30.82
   0  -6  23  349.14   48.66
   0  -6 -23  397.10   69.48
   0  -6 -23  285.16   41.15
   0   6  24  426.07   88.54
   0   6 -24  534.22   90.65
   0   6 -24  376.44   53.85
   0  -6  24  570.76   80.85
   0  -6 -24  546.25  119.12
   0  -6 -24  428.62   67.67
   0   6 -25  171.17   43.44
   0   6  25  277.08   59.76
   0   6 -25  264.84   82.52
   0  -6 -25  301.16   72.12
   0  -6  25  319.98  132.33
   0  -6 -25  226.38   68.64
   0   6 -26   62.31   24.67
   0   6  26   33.34   14.44
   0  -6  26    3.30   11.13
   0  -6 -26   20.97   20.52
   0  -6 -26   23.54   11.73
   0   6 -27  323.42   63.17
   0   6  27  361.25   58.27
   0  -6  27  317.65   55.26
   0  -6 -27  290.24   83.28
   0   6 -28  566.93  120.22
   0   6  28  596.80   80.57
   0  -6  28  773.45   79.73
   0  -6 -28  491.99  108.27
   0  -6 -28  344.75   86.51
   0   6 -29  149.60   41.81
   0   6  29  142.57   40.46
   0  -6  29  159.07   40.01
   0  -6 -29  148.18   31.55
   0   7   0    0.13    6.38
   0   7   0   10.03    5.92
   0   7   0   15.44    8.52
   0  -7   0   25.73    8.81
   0  -7   0   -6.26   11.44
   0  -7   0    1.85    3.43
   0   7   1 9330.25  146.96
   0   7  -1 9053.33  142.79
   0   7  -1 9050.83  146.15
   0   7   1 9473.33  158.59
   0  -7  -1 9415.70  149.68
   0  -7   1 9242.98  145.75
   0  -7  -1 8766.79  147.43
   0  -7  -1 9364.80  152.51
   0  -7   1 8957.15  143.73
   0  -7   1 9307.10  150.90
   0   7  -2   80.88    8.61
   0   7   2   94.60   17.09
   0   7   2  107.93   21.14
   0   7  -2  112.15   17.24
   0   7   2  104.87   16.93
   0   7  -2  102.41   16.00
   0  -7  -2   99.43   19.05
   0  -7  -2  105.96   13.97
   0  -7   2   95.67   15.81
   0  -7   2   94.23   20.67
   0  -7   2   94.06   16.50
   0  -7  -2  110.12   22.81
   0   7  -3  945.87   34.68
   0   7   3  973.59   36.79
   0   7  -3 1006.22   39.75
   0   7  -3  935.16   36.93
   0   7   3  983.72   40.97
   0   7   3  939.19   36.41
   0  -7  -3  986.68   38.16
   0  -7   3  992.82   39.92
   0  -7   3  929.36   34.28
   0  -7  -3  931.51   36.32
   0  -7  -3  985.18   36.04
   0  -7   3  802.79   31.97
   0   7  -4 6133.78  122.27
   0   7   4 6310.22  127.39
   0   7   4 6080.07  125.11
   0   7  -4 6046.65  121.85
   0   7  -4 6325.07  129.24
   0  -7  -4 6431.80  129.91
   0  -7   4 5898.01  119.58
   0  -7   4 6141.00  126.45
   0  -7  -4 6003.63  127.15
   0   7  -5 6311.48  127.24
   0   7  -5 6195.70  123.94
   0   7   5 6427.69  129.90
   0   7   5 6264.77  128.87
   0   7  -5 5943.82  123.80
   0   7   5 6313.76  130.48
   0  -7   5 6073.44  121.50
   0  -7  -5 5918.71  119.51
   0  -7  -5 6247.81  128.27
   0  -7   5 6300.43  127.27
   0  -7  -5 6072.68  125.29
   0  -7   5 6257.95  135.39
   0   7   6   44.20   11.37
   0   7  -6   53.24    7.56
   0   7   6   52.68    9.02
   0   7   6   55.49    9.49
   0   7  -6   45.27    8.84
   0   7  -6   76.73   15.01
   0  -7  -6   37.52    6.65
   0  -7  -6   49.46    9.58
   0  -7   6   35.78    6.94
   0  -7   6   38.77    7.60
   0  -7  -6   49.98   12.04
   0  -7   6   55.27   10.98
   0   7   7   25.78   11.41
   0   7  -7    7.67    6.02
   0   7   7   14.38    6.98
   0   7   7   -2.49    8.93
   0   7  -7    7.76    5.65
   0   7  -7   10.63   10.20
   0  -7  -7    1.27    6.78
   0  -7  -7    6.16    7.98
   0  -7   7    8.97    3.73
   0  -7   7    2.68    7.62
   0  -7  -7   19.96    6.92
   0  -7   7   13.22    9.11
   0   7   8  314.64   48.88
   0   7  -8  295.14   15.30
   0   7   8  293.10   25.40
   0   7   8  333.86   43.32
   0   7  -8  311.79   19.67
   0   7  -8  332.78   28.19
   0  -7  -8  319.86   44.20
   0  -7  -8  291.57   28.62
   0  -7   8  295.71   16.01
   0  -7   8  303.17   19.16
   0  -7  -8  295.41   23.19
   0  -7   8  297.29   19.63
   0   7   9 4628.02  114.30
   0   7  -9 4402.85  108.18
   0   7   9 4692.11  112.97
   0   7  -9 4667.63  109.61
   0   7  -9 4766.30  117.20
   0   7   9 4757.17  114.97
   0  -7  -9 4779.16  113.74
   0  -7  -9 4563.80  110.65
   0  -7   9 4655.90  114.52
   0  -7   9 4699.67  110.46
   0  -7   9 4871.23  115.06
   0  -7  -9 4847.09  116.64
   0   7  10   21.43    8.05
   0   7 -10   16.48    3.94
   0   7  10   17.65    7.09
   0   7  10   29.19    9.43
   0   7 -10    2.48    3.99
   0   7 -10   10.21    6.30
   0  -7 -10    1.71    9.17
   0  -7 -10    7.09    4.30
   0  -7  10    4.44    2.60
   0  -7  10   10.27    5.09
   0  -7 -10   18.34    7.68
   0  -7  10   -3.69   12.43
   0   7  11  130.32   22.99
   0   7 -11  100.66   13.24
   0   7  11  139.20   25.41
   0   7  11  137.80   16.91
   0   7 -11  145.13   18.70
   0   7 -11  153.02   23.32
   0  -7 -11   91.61   12.60
   0  -7 -11  130.32   15.89
   0  -7  11  152.49   20.01
   0  -7  11  120.10   19.43
   0  -7 -11  125.08   22.35
   0  -7  11  107.82   20.78
   0   7 -12 2511.20   83.55
   0   7  12 2479.77   83.08
   0   7 -12 2537.28   83.19
   0   7  12 2373.46   84.34
   0   7 -12 2328.96   81.74
   0  -7  12 2492.27   85.87
   0  -7  12 2455.45   84.43
   0  -7 -12 2421.54   80.92
   0  -7 -12 2416.97   81.92
   0  -7  12 2327.87   76.46
   0  -7 -12 2235.57   75.96
   0  -7 -12 2655.15  104.63
   0   7 -13  487.45   29.32
   0   7 -13  503.24   46.20
   0   7  13  483.48   17.21
   0   7  13  460.21   54.39
   0   7 -13  426.01   31.42
   0  -7  13  479.66   34.87
   0  -7  13  493.47   23.87
   0  -7 -13  448.26   54.58
   0  -7 -13  390.21   41.80
   0  -7  13  464.32   21.66
   0  -7 -13  468.01   50.99
   0  -7 -13  619.70   82.66
   0   7  14  174.65   26.62
   0   7 -14  197.90   25.69
   0   7  14  265.70   38.01
   0   7 -14  204.09   31.39
   0   7 -14  252.20   24.32
   0  -7 -14  191.94   23.46
   0  -7 -14  231.40   37.34
   0  -7  14  243.89   27.85
   0  -7 -14  235.89   31.65
   0  -7  14  270.71   35.29
   0   7  15  115.31   16.01
   0   7 -15   98.57   15.31
   0   7  15  109.36   19.92
   0   7 -15  106.67   17.04
   0   7 -15  119.62   20.07
   0  -7  15  153.33   21.18
   0  -7  15  119.74   16.99
   0  -7 -15  166.48   26.73
   0  -7 -15  126.98   28.85
   0   7 -16  224.64   28.66
   0   7  16  179.80   34.52
   0   7 -16  170.84   33.36
   0   7  16  143.30   25.77
   0  -7  16  202.18   36.31
   0  -7  16  185.64   31.89
   0  -7 -16  156.00   27.62
   0  -7 -16  242.97   31.35
   0   7 -17  827.37   53.29
   0   7  17  815.05   65.56
   0   7 -17  880.38   99.07
   0  -7 -17  857.13  117.58
   0  -7  17  970.67   86.85
   0  -7 -17  840.55   73.24
   0   7  18  502.19   52.88
   0   7 -18  533.23   61.47
   0   7 -18  486.29   42.02
   0  -7  18  527.50   73.42
   0  -7 -18  496.36   78.94
   0  -7  18  449.34   46.54
   0  -7 -18  597.26   72.25
   0   7 -19   54.17   14.13
   0   7  19   56.67   13.71
   0   7 -19   49.74   18.17
   0  -7 -19   86.63   28.31
   0  -7  19   36.88   12.58
   0  -7 -19   65.13   21.33
   0  -7  19   43.22   13.44
   0   7  20  247.44   50.82
   0   7 -20  159.81   40.42
   0   7 -20  166.10   33.15
   0  -7  20  230.30   41.44
   0  -7 -20  197.35   82.34
   0  -7  20  121.65   29.06
   0  -7 -20  224.44   39.04
   0   7 -21 2214.10   96.48
   0   7  21 2082.31  104.34
   0   7 -21 2132.12  175.46
   0  -7 -21 2368.25  216.82
   0  -7  21 2253.33   97.48
   0  -7 -21 2469.10  154.54
   0   7 -22  124.30   24.33
   0   7  22  166.34   32.09
   0   7 -22  145.85   22.15
   0  -7 -22  173.91   27.83
   0  -7  22  184.23   20.68
   0  -7 -22  114.09   27.72
   0   7 -23  612.80   30.96
   0   7  23  586.04   95.49
   0   7 -23  591.53   99.17
   0  -7 -23  591.97  107.22
   0  -7  23  728.11   78.74
   0  -7 -23  552.44   62.03
   0   7 -24 1120.51   41.43
   0   7  24 1267.80   93.63
   0   7 -24 1064.05  119.15
   0  -7 -24 1132.46   69.33
   0  -7  24 1320.53   86.45
   0  -7 -24 1302.57   39.76
   0   7 -25 1747.39  679.29
   0   7  25 1887.29   89.69
   0  -7  25 2008.57   88.38
   0  -7 -25 1932.38  112.01
   0   7 -26  306.86   57.64
   0   7  26  331.25   38.77
   0  -7  26  284.10   76.27
   0  -7 -26  361.19   52.32
   0  -7 -26  247.77   63.81
   0   7 -27    4.08   13.39
   0   7  27   16.78   11.22
   0  -7  27   20.66    9.88
   0  -7 -27   19.08   18.09
   0  -7 -27   10.55    8.12
   0   7 -28  156.03   43.18
   0   7  28  139.76   45.16
   0  -7  28  103.36   46.33
   0  -7 -28  167.74   44.01
   0  -7 -28  106.85   36.72
   0   8   010754.76  169.60
   0   8   010763.93  174.83
   0  -8   011082.70  174.58
   0  -8   011280.42  182.50
   0  -8   011191.82  180.11
   0   8   1  339.80   20.78
   0   8  -1  409.89   17.85
   0   8   1  288.13   19.19
   0   8  -1  391.43   21.52
   0   8   1  417.87   21.16
   0  -8  -1  413.60   18.28
   0  -8   1  395.18   17.05
   0  -8  -1  413.06   28.38
   0  -8   1  389.60   16.86
   0  -8  -1  351.03   21.28
   0  -8   1  399.45   24.49
   0   8  -2 1865.20   49.07
   0   8   2 1838.62   48.80
   0   8   2 1943.89   62.05
   0   8  -2 1929.60   52.30
   0   8   2 1861.99   53.37
   0   8  -2 1947.93   63.45
   0  -8  -2 2014.46   53.85
   0  -8   2 1898.65   53.43
   0  -8   2 1929.89   52.85
   0  -8  -2 1877.27   52.90
   0  -8  -2 1896.03   53.78
   0  -8   2 1919.24   65.59
   0   8  -3 2521.46   66.00
   0   8   3 2431.67   64.03
   0   8  -3 2626.20   74.56
   0   8  -3 2519.49   67.14
   0   8   3 2406.65   66.97
   0   8   3 2420.04   66.91
   0  -8  -3 2428.39   67.47
   0  -8   3 2434.03   66.78
   0  -8   3 2487.15   66.25
   0  -8  -3 2452.15   67.32
   0  -8   3 2526.20   69.44
   0   8  -4  318.80   21.33
   0   8   4  325.11   24.72
   0   8  -4  270.93   18.73
   0   8  -4  311.49   26.53
   0   8   4  289.53   19.22
   0   8   4  246.87   16.21
   0  -8  -4  289.15   17.92
   0  -8   4  285.14   18.92
   0  -8   4  276.08   15.98
   0  -8  -4  272.34   18.44
   0  -8  -4  294.83   23.56
   0  -8   4  290.90   22.09
   0   8  -5  850.50   31.69
   0   8   5  899.11   34.12
   0   8   5  880.01   35.78
   0   8   5  856.82   36.13
   0   8  -5  873.17   36.90
   0   8  -5  857.98   33.52
   0  -8  -5  847.03   36.26
   0  -8  -5  885.87   34.26
   0  -8   5  855.88   33.31
   0  -8  -5  895.87   53.26
   0  -8   5  872.77   35.30
   0   8   6  355.09   20.61
   0   8  -6  344.17   17.76
   0   8   6  362.71   24.20
   0   8   6  319.94   18.56
   0   8  -6  369.75   23.59
   0   8  -6  369.62   37.62
   0  -8  -6  356.55   23.90
   0  -8  -6  337.87   17.39
   0  -8   6  338.44   21.27
   0  -8   6  340.94   17.10
   0  -8  -6  347.30   24.65
   0  -8   6  332.18   20.62
   0   8   7   49.33   12.02
   0   8  -7   45.01    8.30
   0   8   7   17.89    5.66
   0   8   7   29.07    8.57
   0   8  -7   28.37    9.94
   0   8  -7   35.18    9.20
   0  -8  -7   21.32    8.82
   0  -8  -7   22.97    5.19
   0  -8   7   29.97    5.21
   0  -8   7   18.37   10.42
   0  -8  -7   31.95    6.99
   0  -8   7   37.17    6.88
   0   8   8  183.49   24.63
   0   8  -8  163.49   20.51
   0   8   8  209.70   30.85
   0   8   8  180.78   35.26
   0   8  -8  178.54   31.03
   0   8  -8  174.49   24.44
   0  -8  -8  174.96   21.04
   0  -8  -8  161.31   24.15
   0  -8   8  181.16   15.30
   0  -8   8  204.90   27.75
   0  -8  -8  175.77   28.07
   0  -8   8  171.50   14.24
   0   8   9  668.13   55.50
   0   8  -9  730.53   28.69
   0   8   9  661.03   27.88
   0   8   9  722.78   34.98
   0   8  -9  755.31   32.77
   0   8  -9  749.65   40.37
   0  -8  -9  735.39   54.00
   0  -8  -9  720.86   37.46
   0  -8   9  729.23   30.99
   0  -8   9  676.46   26.73
   0  -8  -9  766.03   53.08
   0  -8   9  765.11   37.15
   0   8  10   68.12   13.62
   0   8 -10   84.35   11.19
   0   8  10   58.61   12.14
   0   8  10   29.88    8.53
   0   8 -10   73.06   12.17
   0   8 -10   81.17   13.89
   0  -8 -10   68.51    9.55
   0  -8 -10   60.13   10.28
   0  -8  10   76.30   12.32
   0  -8  10   72.75   13.99
   0  -8 -10   98.67   14.93
   0  -8  10   74.77   14.77
   0   8  11 1708.06   63.94
   0   8 -11 1767.64   59.50
   0   8  11 1789.52   70.07
   0   8  11 1804.88   62.65
   0   8 -11 1724.44   59.09
   0   8 -11 1671.41   81.60
   0  -8 -11 1724.68   67.43
   0  -8 -11 1731.66   61.57
   0  -8  11 1810.56   68.30
   0  -8  11 1693.00   60.42
   0  -8 -11 1758.45   63.87
   0  -8  11 1744.46   64.87
   0   8 -12 1270.28   49.89
   0   8  12 1242.73   52.98
   0   8  12 1142.64   56.13
   0   8 -12 1234.33   50.59
   0   8 -12 1237.36   53.39
   0  -8  12 1262.72   49.97
   0  -8 -12 1200.60   65.72
   0  -8 -12 1197.67   48.96
   0  -8  12 1175.20   49.20
   0  -8 -12 1238.71   63.78
   0  -8  12 1241.23   53.80
   0   8  13 3380.58  100.34
   0   8 -13 3403.72   95.26
   0   8  13 3559.86  104.96
   0   8 -13 3312.08  115.62
   0   8 -13 3540.54   99.33
   0  -8 -13 3034.90   85.27
   0  -8 -13 3527.23  124.94
   0  -8  13 3423.37   93.58
   0  -8 -13 3302.96   98.47
   0  -8  13 3546.30   97.62
   0   8 -14 3617.35  115.72
   0   8  14 3794.86  120.04
   0   8 -14 3401.16  114.71
   0   8  14 3516.00  111.53
   0  -8  14 3461.83  108.16
   0  -8  14 3478.39  107.50
   0  -8 -14 3367.33  123.59
   0  -8 -14 3650.37  123.35
   0   8 -15 1260.16   52.21
   0   8  15 1307.10   60.08
   0   8 -15 1135.40   75.36
   0   8  15 1101.16   65.82
   0  -8  15 1141.29   67.70
   0  -8  15 1146.04   67.02
   0  -8 -15 1145.65   80.84
   0  -8 -15 1311.39   93.38
   0   8 -16 1444.50   73.03
   0   8  16 1507.48   68.32
   0   8 -16 1306.09   63.99
   0  -8 -16 1413.47  147.68
   0  -8  16 1575.58   89.54
   0  -8  16 1356.40   63.72
   0  -8 -16 1460.59   92.28
   0   8 -17 1994.51   86.38
   0   8  17 2041.86   91.65
   0   8 -17 1905.57   87.44
   0  -8 -17 2129.96  163.73
   0  -8  17 2053.08   89.54
   0  -8  17 1947.90   85.43
   0  -8 -17 1957.15  107.30
   0   8 -18   58.61   13.03
   0   8  18   79.62   18.64
   0   8 -18   51.96   18.88
   0  -8 -18   85.06   21.01
   0  -8  18   74.67   18.04
   0  -8  18   60.35   11.72
   0  -8 -18   80.71   19.63
   0   8 -19 2595.57  103.53
   0   8  19 2542.10  104.45
   0   8 -19 2480.10  127.52
   0  -8 -19 2441.27  124.93
   0  -8  19 2742.33  111.73
   0  -8  19 2503.89  100.38
   0  -8 -19 2662.14  111.77
   0   8 -20   26.01   11.25
   0   8  20   79.29   19.91
   0   8 -20   57.65   20.55
   0  -8 -20   31.71   20.33
   0  -8  20   33.65   10.73
   0  -8  20   50.87   12.17
   0  -8 -20   49.13   18.25
   0   8 -21  422.27   53.62
   0   8  21  543.52   55.70
   0   8 -21  413.62   76.00
   0  -8 -21  477.73   75.83
   0  -8  21  602.47   54.85
   0  -8 -21  462.22   55.26
   0   8 -22  589.85   22.84
   0   8  22  569.00   59.22
   0   8 -22  596.43  109.98
   0  -8 -22  587.89   99.53
   0  -8  22  705.86   28.93
   0  -8 -22  651.05   78.20
   0   8 -23   12.11    6.41
   0   8  23   12.33   11.41
   0   8 -23   52.94   23.75
   0  -8 -23   34.54   22.51
   0  -8  23   45.13    9.60
   0  -8 -23   -1.40   11.97
   0   8 -24    6.19   14.07
   0   8  24   21.71   13.13
   0  -8  24   23.77    8.77
   0  -8 -24   28.69   34.80
   0  -8 -24   -0.93   13.29
   0   8 -25   -2.08   23.10
   0   8  25  103.94   15.35
   0  -8  25   77.17   25.34
   0  -8 -25  134.64   29.17
   0  -8 -25   85.32   19.98
   0   8 -26  812.16  124.39
   0   8  26  846.41   91.89
   0  -8  26  867.32   74.25
   0  -8 -26  904.87  138.81
   0  -8 -26  747.58   88.51
   0   8 -27   34.87   17.84
   0   8  27   -5.60   13.73
   0  -8  27   12.45   10.28
   0  -8 -27  -12.82   23.54
   0  -8 -27   21.99    9.58
   0   8 -28  361.08   94.96
   0   8  28  421.58  103.76
   0  -8  28  395.27  100.09
   0  -8 -28  425.91  108.04
   0  -8 -28  250.80   91.80
   0   9   0    1.26    3.42
   0   9   0   17.78    6.96
   0   9   0   13.68   10.11
   0  -9   0   27.65   10.57
   0  -9   0   -2.82   10.35
   0  -9   0   -1.54    4.86
   0   9   1   54.45   10.81
   0   9  -1   71.76   10.34
   0   9  -1   75.01   13.52
   0   9   1   44.18   13.33
   0   9   1   67.27   11.71
   0  -9   1   67.00    9.68
   0  -9  -1   46.45    9.28
   0  -9   1   37.44   10.79
   0  -9   1   66.36   11.86
   0  -9  -1   67.41   13.22
   0  -9  -1   70.60   10.63
   0  -9   1   68.28   11.52
   0   9  -2 6686.77  132.28
   0   9   2 7219.50  144.42
   0   9  -2 6586.94  212.22
   0   9   2 6587.61  212.93
   0   9  -2 6631.32  137.81
   0   9   2 6721.74  138.80
   0  -9  -2 6937.25  139.64
   0  -9  -2 6597.26  212.48
   0  -9   2 6591.19  212.52
   0  -9  -2 6667.56  140.62
   0  -9   2 6749.80  135.90
   0  -9   2 6718.78  144.39
   0   9  -3 2385.48   64.26
   0   9   3 2358.16   64.21
   0   9   3 2424.65   69.25
   0   9  -3 2422.83   68.23
   0   9  -3 2372.83   67.66
   0  -9  -3 2386.01   64.30
   0  -9   3 2374.88   67.11
   0  -9  -3 2369.65   66.36
   0  -9   3 2248.97   62.12
   0  -9  -3 2289.08   66.08
   0  -9   3 2384.38   68.86
   0   9  -4  363.74   16.96
   0   9   4  382.39   23.85
   0   9  -4  383.37   42.93
   0   9  -4  375.43   19.48
   0   9   4  338.94   26.55
   0   9   4  372.97   22.36
   0  -9  -4  440.57   28.63
   0  -9   4  434.04   26.71
   0  -9   4  354.24   17.94
   0  -9  -4  361.39   22.56
   0  -9  -4  371.73   24.37
   0  -9   4  365.22   24.04
   0   9  -5   30.28    6.43
   0   9   5   44.97    7.81
   0   9  -5   28.70    9.16
   0   9  -5   14.44    5.14
   0   9   5   32.14    9.90
   0   9   5   13.50    7.05
   0  -9  -5   19.11   10.16
   0  -9   5   43.24    6.99
   0  -9   5   45.16    9.61
   0  -9  -5   35.72    7.84
   0  -9  -5   34.55   11.46
   0   9   6  412.58   32.83
   0   9  -6  363.05   18.34
   0   9   6  372.84   21.41
   0   9   6  428.43   56.29
   0   9  -6  408.61   28.06
   0   9  -6  345.50   27.20
   0  -9  -6  438.91   45.51
   0  -9  -6  375.83   28.66
   0  -9   6  401.19   28.79
   0  -9   6  350.38   17.86
   0  -9  -6  451.91   59.00
   0  -9   6  379.78   44.25
   0   9   7 8140.14  170.38
   0   9  -7 7948.56  156.17
   0   9   7 7799.95  154.63
   0   9   7 8136.23  169.05
   0   9  -7 8244.36  163.93
   0   9  -7 8134.33  167.82
   0  -9  -7 7910.23  161.48
   0  -9  -7 8637.38  171.51
   0  -9   7 8045.75  158.82
   0  -9   7 8069.61  163.36
   0  -9  -7 7853.77  162.97
   0  -9   7 8246.73  168.18
   0   9   8  327.40   48.50
   0   9  -8  306.06   24.20
   0   9   8  313.91   21.92
   0   9   8  320.94   32.63
   0   9  -8  302.22   41.66
   0   9  -8  364.17   43.26
   0  -9  -8  284.83   33.31
   0  -9  -8  290.37   38.53
   0  -9   8  299.73   27.26
   0  -9   8  292.40   29.35
   0  -9  -8  347.86   48.91
   0  -9   8  293.88   48.17
   0   9   9   26.06   16.00
   0   9  -9    5.02    4.24
   0   9   9   -1.17    5.62
   0   9  -9   35.07   10.52
   0   9  -9    5.61    4.04
   0   9   9   14.74    5.98
   0  -9   9    4.57    7.79
   0  -9  -9    2.87   10.37
   0  -9   9   12.66    7.26
   0  -9   9   10.08    5.56
   0  -9  -9   12.24   10.92
   0  -9  -9    8.12    6.05
   0   9  10 7088.53  138.23
   0   9 -10 6845.32  128.65
   0   9  10 7232.73  149.08
   0   9  10 7258.88  140.63
   0   9 -10 7341.48  136.21
   0   9 -10 7195.31  146.68
   0  -9 -10 7124.51  136.40
   0  -9 -10 6768.38  135.11
   0  -9  10 7353.68  141.12
   0  -9  10 7070.38  133.34
   0  -9 -10 7175.82  137.51
   0  -9  10 6871.32  134.06
   0   9  11 1550.10  272.05
   0   9 -11 1536.08  260.57
   0   9  11 1603.67   64.83
   0   9  11 1520.00   53.88
   0   9 -11 1610.80   54.42
   0   9 -11 1621.24   60.83
   0  -9 -11 1543.75  262.21
   0  -9 -11 1423.17   50.71
   0  -9  11 1627.43   57.40
   0  -9  11 1581.33   56.68
   0  -9 -11 1570.36   30.19
   0  -9  11 1585.21   58.09
   0   9  12   25.46   16.45
   0   9 -12    8.23    3.90
   0   9  12    3.20    7.26
   0   9 -12    9.57    5.78
   0   9  12   -3.82    7.15
   0   9 -12   -4.53   14.74
   0  -9  12   18.98    9.59
   0  -9 -12   16.39    7.50
   0  -9  12    9.68    4.48
   0  -9 -12   32.14   12.25
   0  -9  12    9.21    8.58
   0   9 -13  619.54   76.94
   0   9  13  585.48   38.73
   0   9 -13  567.55   55.11
   0   9 -13  512.87   34.70
   0   9  13  503.51   64.42
   0  -9 -13  458.01   58.29
   0  -9  13  508.73   33.18
   0  -9 -13  618.38   56.78
   0  -9  13  689.25   64.06
   0   9  14  983.41   87.93
   0   9 -14  992.11   58.36
   0   9  14 1012.82   60.82
   0   9 -14 1168.35  205.26
   0   9 -14  991.38   60.46
   0  -9  14 1086.82   65.85
   0  -9  14 1026.00   60.21
   0  -9 -14 1012.04   61.69
   0  -9 -14 1088.65   75.75
   0   9 -15   11.29    5.27
   0   9  15    8.52   11.60
   0   9 -15   24.32   10.17
   0  -9 -15   -7.70   17.32
   0  -9  15   13.23    7.18
   0  -9 -15   21.72    8.53
   0   9 -16 2536.01  101.25
   0   9  16 2798.11  122.78
   0   9 -16 2575.81  111.63
   0  -9 -16 2652.80  160.44
   0  -9  16 2800.69  115.85
   0  -9  16 2546.10  100.59
   0  -9 -16 2587.81  102.90
   0   9 -17  369.79   49.30
   0   9  17  450.82   72.70
   0   9 -17  391.93   32.37
   0  -9 -17  393.66   48.59
   0  -9  17  518.92   73.91
   0  -9  17  362.47   60.58
   0  -9 -17  474.98   72.14
   0   9 -18  727.38   46.10
   0   9  18  767.42   54.65
   0   9 -18  839.14   67.50
   0  -9 -18  841.72  111.60
   0  -9  18  785.05   74.07
   0  -9  18  661.43   65.82
   0  -9 -18  743.37   72.56
   0   9 -19 2870.54  122.08
   0   9  19 2763.43  119.34
   0   9 -19 2668.33  143.65
   0  -9 -19 2890.27  129.76
   0  -9  19 2852.25  120.35
   0  -9  19 2588.57  109.64
   0  -9 -19 2743.20  140.67
   0   9 -20  -17.31    7.96
   0   9  20   24.14   13.07
   0   9 -20   -0.18   18.56
   0  -9 -20    7.64   12.29
   0  -9  20   -0.77    9.89
   0  -9 -20    8.08   11.23
   0   9 -21  893.32   24.44
   0   9  21  828.35   39.22
   0   9 -21  934.75   72.71
   0  -9 -21  906.29   76.03
   0  -9  21  920.38   55.11
   0  -9 -21  912.58   99.64
   0   9 -22   22.33   10.39
   0   9  22   60.88   14.82
   0   9 -22   79.99   24.66
   0  -9 -22   37.31   28.53
   0  -9  22   65.78   13.90
   0  -9 -22   21.84    9.43
   0   9 -23 1174.88   28.40
   0   9  23 1400.13   75.97
   0   9 -23 1225.54  112.24
   0  -9 -23 1204.55  160.14
   0  -9  23 1283.85   84.14
   0  -9 -23 1242.84  127.78
   0   9 -24 1327.51   54.64
   0   9  24 1577.21   62.00
   0   9 -24 1404.56  137.68
   0  -9 -24 1417.54  212.94
   0  -9  24 1386.31  102.82
   0  -9 -24 1600.17   65.01
   0   9 -25   53.89   26.49
   0   9  25   28.36   15.02
   0  -9  25   11.33   12.34
   0  -9 -25   30.46   17.19
   0  -9 -25   18.65    8.37
   0   9 -26  265.60   78.13
   0   9  26  281.31   63.28
   0  -9  26  294.63   59.03
   0  -9 -26  439.59   69.54
   0  -9 -26  216.83   58.77
   0   9 -27  607.75  167.59
   0   9  27  784.23  113.12
   0  -9  27  753.89  105.16
   0  -9 -27  778.89  181.91
   0  -9 -27  776.42  107.44
   0   9 -28  239.56   54.61
   0   9  28  220.34   49.31
   0  -9  28  177.16   63.38
   0  -9 -28  228.04   35.86
   0  10   0 2681.97   73.53
   0  10   0 2728.34   79.25
   0  10   0 2443.32   82.28
   0 -10   0 2752.51   81.47
   0 -10   0 2873.05   80.57
   0 -10   0 2751.81   74.68
   0  10   1 3047.86   82.46
   0  10  -1 3028.09   83.49
   0  10  -1 3038.37   86.29
   0  10   1 2997.01   83.20
   0 -10  -1 2887.41   77.75
   0 -10  -1 2823.31   78.70
   0 -10   1 2903.82   78.64
   0 -10   1 2943.60   78.44
   0 -10   1 2981.94   82.87
   0 -10  -1 2995.01   84.17
   0  10   2  183.36   19.28
   0  10  -2  197.72   12.10
   0  10   2  227.67   33.62
   0  10   2  174.67   12.35
   0  10  -2  248.61   39.90
   0 -10  -2  214.60   33.62
   0 -10  -2  228.18   22.42
   0 -10   2  191.69   12.47
   0 -10   2  281.57   40.34
   0 -10  -2  240.09   53.88
   0 -10   2  188.48   14.01
   0  10  -3  535.26   25.47
   0  10   3  473.51   21.01
   0  10   3  656.31   74.42
   0  10  -3  524.23   25.82
   0  10   3  501.83   30.25
   0  10  -3  512.27   27.60
   0 -10  -3  510.68   24.22
   0 -10   3  545.94   27.80
   0 -10   3  509.77   25.11
   0 -10  -3  460.73   23.98
   0 -10  -3  545.93   34.43
   0 -10   3  500.35   31.48
   0  10  -4    7.66    5.22
   0  10   4   -6.54    6.60
   0  10  -4   24.17   10.43
   0  10  -4   16.33    5.52
   0  10   4   -7.79   10.78
   0  10   4   10.93    4.31
   0 -10  -4    8.06    6.03
   0 -10   4    7.20    6.30
   0 -10   4   12.19    3.37
   0 -10  -4   21.10    8.98
   0 -10  -4   -0.98    7.60
   0 -10   4   11.17    6.75
   0  10  -5 2454.71   66.77
   0  10   5 2536.08   72.19
   0  10  -5 2537.90   78.02
   0  10  -5 2465.04   72.45
   0  10   5 2488.68   90.02
   0  10   5 2460.57   81.01
   0 -10  -5 2494.11   75.11
   0 -10   5 2585.97   74.48
   0 -10   5 2411.82   66.17
   0 -10  -5 2423.87   81.83
   0 -10  -5 2482.51   67.74
   0 -10   5 2483.96   70.85
   0  10  -6 4600.18  107.55
   0  10   6 4831.71  114.06
   0  10  -6 4591.42  113.34
   0  10  -6 4688.44  112.50
   0  10   6 4451.00  110.10
   0  10   6 4556.05  115.18
   0 -10  -6 4282.17  104.72
   0 -10   6 4598.04  112.37
   0 -10   6 4569.58  109.39
   0 -10  -6 4514.80  110.78
   0 -10  -6 4559.29  113.00
   0  10  -7  567.43   24.10
   0  10   7  615.18   42.76
   0  10   7  611.26   26.34
   0  10   7  581.98   26.21
   0  10  -7  680.17   48.96
   0  10  -7  622.13   28.73
   0 -10  -7  694.85   55.33
   0 -10  -7  609.66   35.56
   0 -10   7  598.16   24.81
   0 -10  -7  578.15   34.21
   0 -10   7  570.66   25.78
   0  10   8 5011.62  132.01
   0  10  -8 4917.27  117.21
   0  10   8 4868.36  117.57
   0  10   8 5156.68  125.47
   0  10  -8 5205.04  123.95
   0  10  -8 5026.47  124.27
   0 -10  -8 5051.33  123.25
   0 -10  -8 5384.00  832.95
   0 -10   8 5123.91  120.78
   0 -10   8 5051.71  119.49
   0 -10  -8 5015.02  132.10
   0 -10   8 4707.34  123.62
   0  10   9 1231.45   45.75
   0  10  -9 1261.57   41.95
   0  10   9 1268.48   48.61
   0  10   9 1243.32   60.25
   0  10  -9 1278.52   46.04
   0  10  -9 1344.93   51.77
   0 -10  -9 1301.11   56.81
   0 -10  -9 1217.53   42.75
   0 -10   9 1239.68   48.00
   0 -10   9 1221.78   45.27
   0 -10  -9 1279.75   49.23
   0 -10   9 1273.93   61.99
   0  10  10   15.38    9.59
   0  10 -10   -1.34    6.39
   0  10  10   -2.56    7.88
   0  10  10   11.72    6.90
   0  10 -10    8.48    3.69
   0  10 -10   50.67   19.26
   0 -10 -10    2.43    5.34
   0 -10 -10    1.73    5.29
   0 -10  10   11.10    4.87
   0 -10  10    4.31    4.90
   0 -10 -10   10.45    8.35
   0 -10  10   17.85    9.04
   0  10  11   49.22   15.42
   0  10 -11   51.59    8.05
   0  10  11   29.10    9.89
   0  10  11   40.39    9.56
   0  10 -11   66.76   10.23
   0  10 -11   32.63   15.13
   0 -10 -11   64.72   15.53
   0 -10 -11   42.24    7.94
   0 -10  11   47.30    7.23
   0 -10  11   41.42    7.57
   0 -10 -11   62.38   15.45
   0 -10  11   43.50   15.83
   0  10  12   76.11   15.64
   0  10  12   88.71   14.25
   0  10 -12   63.98    9.80
   0  10 -12  100.20   19.41
   0  10  12  107.47   16.58
   0  10 -12   92.34   12.78
   0 -10 -12   74.90   14.53
   0 -10  12   59.19   10.42
   0 -10 -12   89.42   13.44
   0 -10  12  130.60   22.15
   0  10  13  249.56   41.77
   0  10  13  233.63   28.71
   0  10 -13  176.63   26.86
   0  10 -13  225.81   32.18
   0  10 -13  229.64   31.78
   0 -10 -13  190.63   27.35
   0 -10  13  284.02   41.77
   0 -10  13  205.25   25.17
   0 -10 -13  272.21   29.91
   0  10 -14   21.13    6.19
   0  10  14    6.72    6.91
   0  10 -14   40.33   16.41
   0  10 -14   12.45    6.75
   0 -10  14   18.84    6.41
   0 -10 -14   24.52   16.39
   0 -10  14   31.62    5.60
   0 -10 -14   40.60   13.14
   0  10 -15 1362.52   61.17
   0  10  15 1459.86   65.65
   0  10 -15 1410.46   94.88
   0 -10 -15 1472.63   79.66
   0 -10  15 1438.77   67.08
   0 -10  15 1368.36   60.93
   0 -10 -15 1399.02   65.38
   0  10 -16  498.26   42.51
   0  10  16  662.81   83.64
   0  10 -16  563.80   77.19
   0 -10 -16  550.74   98.76
   0 -10  16  642.95   38.59
   0 -10  16  493.12   48.02
   0 -10 -16  535.82   64.20
   0  10 -17 5349.89  152.92
   0  10  17 5560.72  177.53
   0  10 -17 5161.80  175.77
   0 -10 -17 5431.32  172.69
   0 -10  17 5240.87  150.97
   0 -10  17 5093.33   45.65
   0 -10 -17 5265.89  154.33
   0  10 -18 2558.46  103.06
   0  10  18 2649.12  110.40
   0  10 -18 2585.12  110.93
   0 -10 -18 2555.19  141.04
   0 -10  18 2515.29  102.57
   0 -10  18 2473.30   99.60
   0 -10 -18 2724.06  117.00
   0  10 -19   12.58    6.93
   0  10  19   38.98   17.37
   0  10 -19   66.80   22.73
   0 -10 -19   55.70   18.16
   0 -10  19   48.99   17.46
   0 -10 -19   37.04   16.97
   0  10 -20 1507.07   85.09
   0  10  20 1454.00   82.05
   0  10 -20 1605.11   99.31
   0 -10 -20 1632.06  143.08
   0 -10  20 1660.14  145.90
   0 -10 -20 1561.67   88.48
   0  10 -21   11.79    7.14
   0  10  21   25.81    9.61
   0  10 -21   44.43   20.37
   0 -10 -21   20.85   19.37
   0 -10  21    7.17    5.95
   0 -10 -21    9.99   10.64
   0  10 -22   -0.59    8.33
   0  10  22   12.31    8.61
   0  10 -22   19.22   18.79
   0 -10 -22  -10.56   22.64
   0 -10  22   15.09    6.94
   0 -10 -22   18.33   18.78
   0  10 -23   52.34   20.38
   0  10  23  111.15   24.93
   0  10 -23   47.02   25.02
   0 -10 -23   92.20   39.61
   0 -10  23  115.87   16.47
   0 -10 -23   97.64   22.76
   0  10 -24  353.00   43.73
   0  10  24  317.95  132.22
   0 -10  24  302.99   58.57
   0 -10 -24  276.29   59.63
   0 -10 -24  295.94   53.33
   0  10 -25  104.89   24.49
   0  10  25   82.42   16.84
   0 -10  25   77.92   18.63
   0 -10 -25   90.85   25.31
   0 -10 -25   29.89   13.62
   0  10 -26 1738.74  103.04
   0  10  26 1824.54  100.73
   0 -10  26 1803.66   98.25
   0 -10 -26 1617.23  167.35
   0 -10 -26 1471.34  104.97
   0  10 -27  839.30  158.83
   0  10  27 1148.78  107.75
   0 -10  27 1017.40  106.59
   0 -10 -27  945.40  145.43
   0 -10 -27  865.08  114.41
   0  11   0   -0.29    4.92
   0  11   0  -13.53   10.48
   0 -11   0    3.94    4.90
   0 -11   0   10.54    6.39
   0 -11   0   12.98    6.27
   0  11   1  230.78   20.29
   0  11   1  247.69   35.77
   0  11  -1  257.20   25.10
   0  11   1  197.69   13.72
   0  11  -1  198.40   15.91
   0 -11   1  232.11   12.67
   0 -11  -1  269.58   37.42
   0 -11   1  233.79   30.50
   0 -11  -1  316.42   43.26
   0 -11   1  243.32   42.20
   0 -11  -1  221.76   16.73
   0  11   2  349.00   14.26
   0  11   2  400.92   20.40
   0  11  -2  403.17   31.21
   0  11   2  372.39   18.75
   0  11  -2  459.51   40.64
   0 -11  -2  346.56   15.87
   0 -11   2  350.33   19.71
   0 -11   2  346.98   15.92
   0 -11  -2  403.47   22.51
   0 -11  -2  455.26   52.38
   0 -11   2  362.63   21.69
   0  11  -3 2004.24   60.84
   0  11   3 2007.26   64.07
   0  11  -3 1989.78   62.55
   0  11   3 1987.51   77.40
   0  11   3 2021.57   74.22
   0  11  -3 1911.11   61.70
   0 -11  -3 1984.76   62.87
   0 -11  -3 2129.56   72.53
   0 -11   3 2069.71   82.38
   0 -11  -3 1917.67   70.82
   0 -11   3 2033.99   70.66
   0 -11   3 2034.03   65.45
   0  11  -4 4526.94  104.86
   0  11   4 4541.51  108.22
   0  11   4 4616.10  112.04
   0  11  -4 4712.60  111.56
   0  11   4 4536.47  117.58
   0  11  -4 4671.49  119.62
   0 -11  -4 4475.58  112.04
   0 -11   4 4520.64  109.90
   0 -11   4 4590.53  109.99
   0 -11  -4 4605.46  112.69
   0 -11   4 4721.73  115.22
   0  11  -5 7335.74  143.94
   0  11   5 7437.88  149.42
   0  11   5 7317.15  151.32
   0  11  -5 7374.49  147.31
   0  11   5 7499.66  153.06
   0  11  -5 7485.10  154.02
   0 -11  -5 7358.10  150.86
   0 -11   5 7494.76  156.11
   0 -11   5 7049.85  141.51
   0 -11  -5 7373.99  152.48
   0 -11   5 7396.06  154.21
   0 -11  -5 7235.68  155.36
   0  11  -6 5068.74  118.96
   0  11   6 5234.90  123.84
   0  11  -6 5185.90  127.10
   0  11  -6 5144.16  125.09
   0  11   6 5184.71  126.80
   0  11   6 5059.14  124.07
   0 -11  -6 5148.92  124.74
   0 -11   6 5192.54  126.72
   0 -11   6 5073.32  123.71
   0 -11  -6 5072.73  125.17
   0 -11  -6 5018.41  118.64
   0 -11   6 5206.66  125.93
   0  11  -7 1478.71   47.50
   0  11   7 1486.99   54.81
   0  11  -7 1594.38   62.83
   0  11  -7 1289.65   49.22
   0  11   7 1609.49   68.96
   0  11   7 1613.00   58.36
   0 -11  -7 1478.90   57.73
   0 -11   7 1532.08  260.58
   0 -11   7 1510.92   56.73
   0 -11  -7 1613.03   64.81
   0 -11  -7 1490.11   56.13
   0 -11   7 1568.10   61.36
   0  11  -814629.23  262.11
   0  11   814577.41  263.32
   0  11   814034.20  259.86
   0  11   814665.95  269.13
   0  11  -814338.65  265.23
   0  11  -815164.08  278.91
   0 -11  -814959.55  274.00
   0 -11  -814949.11  276.11
   0 -11   814612.77  264.36
   0 -11  -814788.15  271.26
   0 -11   814733.63  273.42
   0  11   9   13.46    8.93
   0  11  -9   15.00    7.95
   0  11   9   -4.32    7.37
   0  11  -9   18.70    5.65
   0  11  -9   14.09   19.18
   0  11   9   -3.05   11.00
   0 -11  -9    5.54    6.05
   0 -11  -9   18.75    6.67
   0 -11   9   21.60    6.48
   0 -11  -9   14.81    7.72
   0 -11   9   12.33    4.77
   0  11  10 2384.64   84.88
   0  11 -10 2321.21   79.64
   0  11  10 2301.76   78.31
   0  11 -10 2389.51  106.70
   0  11  10 2451.07   90.57
   0  11 -10 2469.73   82.32
   0 -11 -10 2598.12   87.53
   0 -11  10 2337.80   79.31
   0 -11 -10 2438.67   92.81
   0 -11  10 2403.67   79.53
   0  11  11  925.77   87.85
   0  11 -11  964.75   41.43
   0  11  11 1047.61   46.50
   0  11 -11 1023.39   49.57
   0  11  11  936.97   80.25
   0  11 -11  986.04   60.76
   0 -11 -11  918.98   41.60
   0 -11  11  915.98   40.26
   0 -11 -11 1014.77   56.63
   0 -11  11 1097.95   64.25
   0  11  12  756.37   52.76
   0  11 -12  753.33   63.42
   0  11  12  755.15   48.87
   0  11 -12  681.06   46.01
   0  11 -12  730.33   47.48
   0 -11 -12  720.95   53.49
   0 -11  12  803.07   58.13
   0 -11  12  835.39   64.92
   0 -11 -12  773.90   71.48
   0  11  13  302.56   44.21
   0  11  13  310.05   54.52
   0  11 -13  247.83   37.69
   0  11 -13  263.16   33.72
   0  11 -13  292.17   38.62
   0 -11 -13  218.07   38.43
   0 -11  13  258.46   39.95
   0 -11  13  247.24   35.78
   0 -11 -13  286.41   42.54
   0  11 -14   -3.33   16.18
   0  11 -14    4.67    5.68
   0  11  14   12.24   11.01
   0  11  14   17.04    8.16
   0  11 -14    4.95    9.53
   0 -11  14    3.13    5.53
   0 -11  14    7.38    2.64
   0 -11 -14   45.86   16.88
   0  11 -15 1312.57   59.13
   0  11  15 1235.88   80.49
   0  11 -15 1447.33  124.76
   0 -11 -15 1519.26  153.13
   0 -11  15 1300.65   58.84
   0 -11  15 1105.62   75.72
   0 -11 -15 1279.74  186.06
   0  11 -16 1306.88   70.67
   0  11  16 1367.86   75.40
   0  11 -16 1398.31   93.20
   0 -11 -16 1358.50   97.52
   0 -11  16 1507.57  100.05
   0 -11  16 1202.28   66.84
   0 -11 -16 1333.83  107.70
   0  11 -17 1311.19   67.63
   0  11  17 1355.70   71.69
   0  11 -17 1318.97  134.35
   0 -11 -17 1467.81  127.29
   0 -11  17 1464.38  103.38
   0 -11 -17 1324.42   80.69
   0  11 -18 4873.86  180.94
   0  11  18 5027.29  198.04
   0  11 -18 5061.10  194.70
   0 -11 -18 5152.93  199.79
   0 -11  18 5203.17  191.87
   0 -11 -18 4830.46  187.33
   0  11 -19  403.91   41.53
   0  11  19  471.33   71.77
   0  11 -19  338.02   59.37
   0 -11 -19  373.30   66.15
   0 -11  19  443.70  170.00
   0 -11  19  126.24   38.37
   0 -11 -19  393.58   52.13
   0  11 -20  888.89   22.85
   0  11  20  854.79   29.44
   0  11 -20  892.97   83.42
   0 -11 -20  912.51  111.68
   0 -11  20 1075.51   85.84
   0 -11 -20  981.89   90.72
   0  11 -21    7.39    4.84
   0  11  21   16.09   16.42
   0  11 -21   30.27   16.61
   0 -11 -21   36.00   12.67
   0 -11  21    3.34    6.57
   0 -11 -21    7.39    9.33
   0  11 -22    8.65    7.82
   0  11  22   39.38   13.96
   0  11 -22   14.52   18.81
   0 -11 -22   57.63   17.61
   0 -11  22   34.40    9.94
   0 -11 -22   45.24   17.62
   0  11 -23   84.13   22.36
   0  11  23  186.61   29.40
   0  11 -23  134.42   35.18
   0 -11 -23  108.82   30.57
   0 -11  23  168.40   30.95
   0 -11 -23  122.92   16.76
   0  11 -24  102.92   22.28
   0  11  24  119.74   23.37
   0  11 -24  115.56   26.63
   0 -11 -24   95.85   26.49
   0 -11  24  121.84   30.15
   0 -11 -24   79.36   27.86
   0  11 -25 1354.89  125.41
   0  11  25 1455.43  101.24
   0 -11  25 1520.20   91.98
   0 -11 -25  975.69  197.54
   0 -11 -25 1300.01  122.26
   0  11 -26  354.63   88.20
   0  11  26  360.91   78.62
   0 -11  26  468.15   61.29
   0 -11 -26  371.22   88.62
   0 -11 -26  235.01   86.77
   0  11 -27  129.32   37.31
   0  11  27  123.36   45.19
   0 -11  27  112.48   28.85
   0 -11 -27  155.64   46.62
   0 -11 -27   97.75   36.22
   0  12   0 1394.59  216.36
   0  12   0 1188.36   46.81
   0 -12   0 1384.17  214.92
   0 -12   0 1443.64   49.46
   0 -12   0 1343.01   51.00
   0 -12   0 1382.10  215.57
   0  12   1  144.64   17.52
   0  12  -1  157.28   21.58
   0  12   1  157.31   23.41
   0  12   1  134.64   30.34
   0  12  -1  154.24   27.41
   0 -12   1  138.66   11.07
   0 -12   1  129.89   23.91
   0 -12  -1  132.10   16.31
   0 -12   1  157.52   22.07
   0 -12  -1  139.54   33.37
   0 -12   1  174.92   28.97
   0 -12  -1  143.90   20.36
   0  12  -2 1809.60   55.44
   0  12   2 1750.49   53.71
   0  12  -2 1863.05   66.69
   0  12   2 1858.17   65.36
   0  12   2 1924.34   74.12
   0  12  -2 1736.61   68.31
   0 -12  -2 1810.94   60.82
   0 -12  -2 1869.78   61.27
   0 -12   2 1690.68   61.91
   0 -12  -2 1697.95   74.89
   0 -12   2 1733.60   74.34
   0 -12   2 1707.03   67.03
   0  12  -3   47.65    5.96
   0  12   3   27.90    6.66
   0  12   3   24.58   14.69
   0  12  -3   63.97    7.86
   0  12   3   31.93   11.10
   0  12  -3   15.83   12.94
   0 -12  -3   50.51    8.42
   0 -12   3   30.68    9.69
   0 -12   3   25.03    5.15
   0 -12  -3   36.25   12.40
   0 -12   3   33.12   12.18
   0 -12  -3   16.57    7.90
   0  12  -410152.13  197.84
   0  12   410280.07 1589.83
   0  12  -410155.12  206.30
   0  12  -410492.88 1622.23
   0  12   410314.17 1595.34
   0 -12  -410310.86 1594.50
   0 -12  -410724.66 1658.07
   0 -12   410104.90  204.23
   0 -12   4 9980.87  199.84
   0 -12  -410238.59 1583.80
   0 -12   4 9999.72  207.96
   0  12  -5 6171.95  113.66
   0  12   5 6235.70  116.48
   0  12   5 6115.18  121.29
   0  12  -5 6092.49  114.87
   0  12   5 6182.11  120.84
   0  12  -5 6345.90  128.73
   0 -12  -5 6043.92  122.27
   0 -12   5 6113.17  136.87
   0 -12   5 5995.39 1013.62
   0 -12  -5 6053.94  122.23
   0 -12   5 6075.90  119.68
   0 -12  -5 5993.62 1013.40
   0  12  -6 2417.97   79.20
   0  12   6 2574.39   83.61
   0  12  -6 2503.74  108.03
   0  12  -6 2561.45   84.69
   0  12   6 2690.34   91.76
   0  12   6 2599.05   88.21
   0 -12  -6 2693.76   90.68
   0 -12   6 2633.67   89.56
   0 -12   6 2477.71   81.77
   0 -12  -6 2370.83   80.51
   0 -12  -6 2538.54   87.10
   0 -12   6 2625.22   93.84
   0  12  -7 5590.83  127.85
   0  12   7 6151.40  116.55
   0  12  -7 5751.79  976.35
   0  12  -7 5941.23 1004.63
   0  12   7 5832.42  986.74
   0  12   7 5478.99  132.56
   0 -12  -7 5652.40  132.83
   0 -12   7 5909.84  999.19
   0 -12  -7 5782.49  980.16
   0 -12  -7 5587.53  135.19
   0 -12   7 5878.61  995.51
   0  12  -8 8116.63  170.41
   0  12   8 7694.80  162.08
   0  12  -8 7837.28  175.93
   0  12  -8 8393.08  183.13
   0  12   8 8347.47  185.18
   0  12   8 8241.56  179.09
   0 -12  -8 7906.34  167.56
   0 -12   8 8190.50  173.27
   0 -12  -8 8311.48  181.58
   0 -12  -8 7024.34  158.69
   0 -12   8 8231.12  176.77
   0  12  -9 1661.13   56.26
   0  12   9 1463.99   58.41
   0  12  -9 1670.60   61.38
   0  12  -9 1717.25   60.42
   0  12   9 1660.09   63.27
   0  12  -9 1605.49   69.71
   0  12   9 1579.73   36.24
   0 -12  -9 1607.73   58.30
   0 -12  -9 1612.38   60.26
   0 -12   9 1522.46   69.03
   0  12  10  543.32   47.83
   0  12 -10  528.12   38.88
   0  12  10  519.63   36.11
   0  12 -10  590.14   44.34
   0  12 -10  553.75   37.48
   0 -12 -10  487.64   49.84
   0 -12  10  516.16   43.50
   0 -12  10  494.95   33.40
   0 -12 -10  623.09   74.07
   0  12  11   26.39    8.49
   0  12 -11   44.57    7.80
   0  12  11   51.70   10.66
   0  12 -11   36.39   14.81
   0  12 -11   54.74   12.32
   0 -12 -11   36.61    7.70
   0 -12  11   45.55    9.04
   0 -12  11   40.92   10.33
   0 -12 -11   54.79   18.32
   0  12  12   43.58    9.98
   0  12 -12    7.25    5.63
   0  12  12   33.51    9.41
   0  12 -12   34.54   12.15
   0  12 -12   47.17   11.78
   0 -12 -12   21.23    7.68
   0 -12  12   32.67    7.83
   0 -12  12   34.85    8.22
   0 -12 -12   39.58   11.38
   0  12 -13  610.01   82.07
   0  12  13  417.61   41.09
   0  12 -13  376.27   52.85
   0  12  13  419.78   63.96
   0  12 -13  445.32   56.05
   0 -12  13  461.45   46.58
   0 -12 -13  589.00   84.55
   0  12 -14  497.69   94.70
   0  12 -14  320.07   58.02
   0  12  14  470.60   54.58
   0  12  14  455.72   83.13
   0  12 -14  509.01   55.95
   0 -12  14  525.06   60.94
   0 -12 -14  440.36   66.28
   0  12 -15 2662.92   96.82
   0  12  15 2525.99   90.02
   0  12  15 2554.30  109.02
   0  12 -15 2607.80  100.79
   0 -12  15 2697.45  117.93
   0 -12  15 2462.55   32.78
   0 -12 -15 2510.78   92.26
   0  12 -16 5707.15  186.40
   0  12  16 6146.91  203.87
   0  12 -16 5904.53  205.22
   0 -12 -16 6105.36  211.29
   0 -12  16 6102.00  202.79
   0 -12  16 5406.02  177.17
   0 -12 -16 5932.16  198.88
   0  12 -17   44.90   13.33
   0  12  17   67.17   20.76
   0  12 -17   54.53   15.22
   0 -12 -17   52.29   28.51
   0 -12  17   82.65   21.39
   0 -12  17   44.68   12.57
   0 -12 -17   47.90   14.09
   0  12 -18 4526.49  166.73
   0  12  18 4615.11  170.70
   0  12 -18 4572.14  177.14
   0 -12 -18 4456.00  177.01
   0 -12  18 4795.72  176.37
   0 -12  18 4146.90  151.82
   0 -12 -18 4390.01  164.10
   0  12 -19  261.05   45.01
   0  12  19  257.17   47.81
   0  12 -19  292.54   47.26
   0 -12 -19  262.15   46.92
   0 -12  19  395.95   41.82
   0 -12 -19  279.87   43.98
   0  12 -20 1821.22   77.09
   0  12  20 1784.20   90.67
   0  12 -20 1951.18  187.12
   0 -12 -20 1860.67  167.08
   0 -12  20 1957.43  106.36
   0 -12 -20 1899.09  144.36
   0  12 -21   18.89   15.59
   0  12  21   15.84   13.79
   0 -12  21   12.56   10.19
   0 -12 -21   14.48   25.36
   0 -12 -21   16.84   10.19
   0  12 -22   62.22   13.79
   0  12  22   68.06   16.36
   0  12 -22   57.84   19.82
   0 -12 -22  106.55   35.03
   0 -12  22   77.11   17.04
   0 -12 -22   96.18   23.25
   0  12 -23  690.95   59.53
   0  12  23  640.66   65.10
   0 -12  23  792.83   47.60
   0 -12 -23  598.99  111.59
   0 -12 -23  578.98   91.77
   0  12 -24    9.65   17.06
   0  12  24   12.78   11.29
   0 -12  24   21.76    7.62
   0 -12 -24   33.60   23.52
   0 -12 -24   -0.58   15.47
   0  12 -25   36.21   14.48
   0  12  25   18.28   10.40
   0 -12  25   22.35   11.75
   0 -12 -25   44.84   18.78
   0 -12 -25   21.78   10.81
   0  12 -26  178.41   28.92
   0  12  26   98.03   35.92
   0 -12  26  176.71   20.17
   0 -12 -26  108.86   38.78
   0 -12 -26   78.90   32.57
   0  13   0    4.78    6.04
   0  13   0   11.60    7.79
   0 -13   0    9.56    5.66
   0 -13   0   13.93    6.73
   0 -13   0   -2.45    6.60
   0 -13   0    9.11    6.83
   0  13   1 1773.43   59.57
   0  13  -1 1658.81   55.09
   0  13   1 1681.21   62.34
   0  13   1 1353.44   69.20
   0  13  -1 1747.69   92.35
   0 -13  -1 1627.63   55.09
   0 -13   1 1678.77   55.72
   0 -13   1 1599.11   54.99
   0 -13   1 1493.56   54.87
   0 -13  -1 1707.73   62.04
   0 -13  -1 1590.57   57.43
   0  13  -2 3879.34   89.34
   0  13   2 3824.62   92.85
   0  13  -2 4001.32   96.43
   0  13   2 3901.08   97.33
   0  13   2 3887.31  100.95
   0  13  -2 3861.16   98.99
   0 -13  -2 3736.61   93.18
   0 -13  -2 3856.80   94.34
   0 -13   2 3765.11  100.25
   0 -13  -2 3828.94   97.28
   0 -13   2 3809.40  119.43
   0 -13   2 3685.28   92.06
   0  13  -3 8290.65  152.05
   0  13   3 8503.35  156.52
   0  13  -3 8361.04  153.54
   0  13  -3 8108.05  156.38
   0  13   3 8625.58  170.25
   0  13   3 8332.47  159.34
   0 -13  -3 8526.46  157.74
   0 -13   3 8606.14  163.97
   0 -13   3 8357.69  154.97
   0 -13  -3 7670.91  152.62
   0 -13  -3 8361.89  160.85
   0 -13   3 8434.02  161.36
   0  13  -4  466.59   19.63
   0  13   4  460.45   22.93
   0  13  -4  546.48   25.65
   0  13   4  475.83   26.70
   0  13  -4  516.99   30.30
   0  13   4  548.53   29.07
   0 -13  -4  507.24   27.98
   0 -13  -4  537.15   27.48
   0 -13   4  509.66   42.12
   0 -13  -4  531.12   51.52
   0 -13   4  558.52   48.54
   0 -13   4  504.74   33.52
   0  13  -5  180.54   20.57
   0  13   5  188.34   25.10
   0  13  -5  242.89   23.10
   0  13  -5  185.56   23.52
   0  13   5  232.05   36.17
   0  13   5  157.22   25.16
   0 -13  -5  175.69   23.62
   0 -13   5  188.46   22.36
   0 -13   5  141.11   19.43
   0 -13  -5  116.27   13.32
   0 -13   5  207.27   27.54
   0  13  -619071.32  388.73
   0  13   619160.06  405.46
   0  13  -618950.52  392.69
   0  13   616697.79  351.58
   0 -13  -618858.19  388.51
   0 -13  -619337.51  403.50
   0 -13   617835.37  368.22
   0 -13   619568.45  409.53
   0  13  -7 3632.48   97.99
   0  13   7 4036.64  109.79
   0  13   7 3984.34  114.15
   0  13  -7 3915.28  108.92
   0  13  -7 3844.24  112.75
   0 -13  -7 3856.57  105.60
   0 -13   7 4002.91  109.22
   0 -13  -7 3659.76  111.61
   0 -13   7 3783.88  116.00
   0  13  -8 1855.74   62.34
   0  13   8 1722.69   59.68
   0  13   8 1905.47   72.11
   0  13  -8 1965.67   81.98
   0  13  -8 1909.83   74.12
   0 -13  -8 1860.39   80.45
   0 -13   8 1857.63   64.41
   0 -13  -8 1792.24   73.37
   0 -13   8 1911.69   68.41
   0  13  -9 3337.05  102.92
   0  13   9 3362.63  104.70
   0  13   9 3304.08  110.02
   0  13  -9 3411.93  112.03
   0  13  -9 3371.01  110.41
   0 -13  -9 3375.02  106.05
   0 -13   9 3203.39  108.33
   0 -13  -9 3435.89  113.16
   0 -13   9 3378.47  121.92
   0  13 -10 1679.51   57.55
   0  13  10 1589.11   66.51
   0  13  10 1710.43   65.67
   0  13 -10 1631.54  309.49
   0  13 -10 1632.68  311.65
   0 -13 -10 1645.17   59.25
   0 -13  10 1586.40   71.18
   0 -13 -10 1843.30   70.41
   0  13  11  404.47   65.07
   0  13 -11  281.75   36.15
   0  13  11  398.01   53.34
   0  13 -11  438.67   48.32
   0  13 -11  369.11   45.26
   0 -13 -11  255.98   57.42
   0 -13  11  330.06   27.12
   0 -13  11  327.72   29.44
   0 -13 -11  426.01   61.54
   0  13  12   20.25    8.07
   0  13 -12   14.64    6.78
   0  13  12    4.74    9.67
   0  13 -12   20.98   10.76
   0  13 -12   41.73   13.17
   0 -13 -12    4.92    8.21
   0 -13  12   22.37    8.30
   0 -13  12   16.58    7.14
   0 -13 -12  -14.47   14.56
   0  13 -13   12.81   11.48
   0  13  13   28.90   11.49
   0  13 -13    4.18    5.85
   0  13  13   15.24    9.70
   0  13 -13   13.26   10.64
   0 -13  13   22.27    9.47
   0 -13  13    5.22    4.32
   0 -13 -13   22.30   11.21
   0  13 -14 6373.10  191.39
   0  13 -14 5739.29  162.11
   0  13  14 6758.62  205.05
   0  13  14 6639.89  194.83
   0  13 -14 6614.35  185.98
   0 -13  14 6240.24  179.59
   0 -13  14 6539.29  185.32
   0 -13 -14 6290.01  188.26
   0  13 -15  689.10   46.79
   0  13  15  720.00   63.82
   0  13  15  773.06   72.08
   0  13 -15  769.99   91.39
   0 -13  15  690.32   65.87
   0 -13  15  613.01   41.71
   0 -13 -15  782.76  108.98
   0  13 -16   -3.32   12.31
   0  13  16   -0.35    9.52
   0  13 -16   33.44   10.71
   0 -13  16  -11.59    9.70
   0 -13  16    3.78    8.34
   0 -13 -16   12.74   13.53
   0  13 -17  595.71   43.39
   0  13  17  635.42   80.84
   0  13 -17  739.70   78.36
   0 -13 -17  622.44  114.02
   0 -13  17  629.97   53.90
   0 -13  17  478.15   40.90
   0 -13 -17  591.31   74.42
   0  13 -18 3304.87  132.76
   0  13  18 3424.82  142.98
   0  13 -18 3366.67  143.17
   0 -13 -18 3401.56  148.47
   0 -13  18 3461.13  138.77
   0 -13 -18 3262.83  157.45
   0  13 -19 1577.55   51.66
   0  13  19 1646.72   57.53
   0  13 -19 1618.98   61.48
   0 -13 -19 1548.31   69.62
   0 -13  19 1773.97  384.83
   0 -13 -19 1710.06   59.18
   0  13 -20 1241.41   43.17
   0  13  20 1219.79   42.73
   0  13 -20 1275.09   75.24
   0 -13 -20 1266.76  140.20
   0 -13  20 1400.44   86.65
   0 -13 -20 1182.50  370.21
   0  13 -21   95.39   20.97
   0  13  21  152.83   30.79
   0  13 -21  163.01   30.28
   0 -13 -21  164.33   40.59
   0 -13  21  231.81   28.34
   0 -13 -21  105.76   17.69
   0  13 -22  106.48   26.35
   0  13  22  121.74   25.06
   0  13 -22  170.21   35.85
   0 -13 -22  171.14   32.38
   0 -13  22  195.11   20.50
   0 -13 -22  186.73   34.90
   0  13 -23  385.40   56.78
   0  13  23  349.95   66.96
   0 -13  23  466.38   51.37
   0 -13 -23  391.61   52.78
   0 -13 -23  383.10   44.01
   0  13 -24   21.81   10.46
   0  13  24    4.88    8.77
   0 -13  24   33.58   10.92
   0 -13 -24    9.14   10.93
   0 -13 -24    4.24    9.17
   0  13 -25  352.58  132.09
   0  13  25  514.03   70.05
   0 -13  25  603.59   75.32
   0 -13 -25  461.01  146.38
   0 -13 -25  399.89  108.56
   0  13 -26 2349.14  148.50
   0  13  26 2273.09  134.47
   0 -13  26 2307.10  174.52
   0 -13 -26 2154.27  159.29
   0 -13 -26 2332.09  141.31
   0  14   0 1368.68   56.97
   0  14   0 1333.92   55.81
   0 -14   0 1352.20   54.84
   0 -14   0 1311.48   53.24
   0 -14   0 1325.72   54.80
   0 -14   0 1441.88   85.16
   0  14  -1 2043.31   70.62
   0  14   1 2155.25   72.45
   0  14  -1 2105.92   93.70
   0  14   1 1616.68   59.91
   0 -14  -1 1929.68   71.68
   0 -14   1 2075.99   69.34
   0 -14  -1 1994.71   68.26
   0 -14   1 1993.57   69.61
   0 -14  -1 2015.73   92.02
   0 -14   1 2067.68   73.87
   0  14  -2  130.83   18.26
   0  14   2  157.35   26.63
   0  14   2  121.65   21.59
   0  14  -2  178.11   28.29
   0  14   2  181.44   30.52
   0  14  -2  150.16   23.00
   0 -14  -2  133.72   23.57
   0 -14   2  116.09   22.46
   0 -14   2  126.91   22.63
   0 -14   2  218.14   32.04
   0 -14  -2  169.66   23.05
   0 -14  -2  165.47   25.72
   0  14  -3 3300.25   88.55
   0  14   3 3252.60   87.95
   0  14   3 3305.71   95.35
   0  14  -3 3327.72   90.96
   0  14   3 3447.40  101.09
   0  14  -3 3193.31   94.40
   0 -14  -3 3097.37   99.66
   0 -14   3 2751.12   93.70
   0 -14   3 3161.76   88.80
   0 -14  -3 3094.93  101.20
   0 -14   3 3303.22   97.68
   0 -14  -3 3168.38   94.33
   0  14  -417052.82  349.22
   0  14   417384.05  359.14
   0  14   416903.27  354.43
   0  14  -416994.66  350.65
   0  14  -416984.17  356.43
   0 -14  -417070.36  353.53
   0 -14   416264.23  338.95
   0 -14  -416558.28  349.42
   0 -14   416391.67  345.48
   0  14  -5   12.49    4.84
   0  14   5   14.99    7.32
   0  14   5   35.38   18.90
   0  14  -5   18.83    6.71
   0  14  -5   35.53   18.41
   0 -14  -5   24.66    9.25
   0 -14   5   27.68   11.28
   0 -14  -5   17.27   11.29
   0 -14   5   22.01   11.46
   0  14  -6  -13.02    5.49
   0  14   6   -3.26    9.67
   0  14   6   10.88    9.19
   0  14  -6   -5.78    7.37
   0  14  -6    1.46   17.32
   0 -14  -6   10.78    5.62
   0 -14   6   15.07    6.06
   0 -14  -6  -31.18   17.66
   0 -14   6    4.09    8.54
   0  14  -7 1107.36   45.79
   0  14   7 1174.60   54.71
   0  14   7 1201.72   54.77
   0  14  -7 1270.19   54.02
   0  14  -7 1277.02   87.04
   0 -14  -7 1303.43   56.12
   0 -14   7 1234.49   54.95
   0 -14  -7 1158.51   52.72
   0 -14   7 1262.24   59.84
   0  14  -8 4466.91  137.57
   0  14   8 4519.18  140.45
   0  14   8 4684.61  157.65
   0  14  -8 4590.30  148.82
   0  14  -8 4823.31  155.47
   0 -14  -8 4773.77  147.01
   0 -14   8 4617.49  143.35
   0 -14  -8 4738.38  151.83
   0 -14   8 4662.28  155.62
   0  14  -9 3849.61  112.06
   0  14   9 3923.58  113.54
   0  14  -9 4066.53  119.93
   0  14   9 4064.59  123.39
   0  14  -9 4078.70  126.85
   0 -14   9 3756.86  115.02
   0 -14  -9 3903.03  119.32
   0 -14   9 3913.81  117.48
   0  14 -10   28.46    5.97
   0  14  10   22.22    5.57
   0  14  10   49.21   13.81
   0  14 -10   26.23    5.75
   0  14 -10   30.32   12.56
   0 -14 -10   25.63    6.84
   0 -14  10   18.13    6.54
   0 -14 -10   40.78   14.50
   0 -14  10   43.29   18.82
   0  14 -11   31.86    8.04
   0  14  11   53.69   12.34
   0  14  11   36.10   10.66
   0  14 -11   58.76   13.38
   0  14 -11   24.29   17.00
   0 -14 -11   34.72   10.36
   0 -14  11   42.08   11.99
   0 -14 -11   36.52   11.80
   0 -14  11   58.78   12.60
   0  14 -12 4312.12  137.56
   0  14  12 4603.50  156.77
   0  14 -12 4649.95  150.75
   0  14  12 4594.86  152.15
   0  14 -12 4526.32  152.91
   0 -14  12 4234.17  136.87
   0 -14 -12 4781.72  157.44
   0  14 -13 3365.39  116.06
   0  14  13 3489.65   55.88
   0  14  13 3288.63  137.71
   0  14 -13 3281.29  119.34
   0 -14  13 3306.95  113.21
   0 -14  13 3138.58  109.66
   0 -14 -13 3196.33  137.63
   0  14 -14   11.40    6.80
   0  14  14    8.25    8.46
   0  14  14   35.75   14.84
   0  14 -14   11.67   10.11
   0 -14  14    4.51    7.22
   0 -14  14   13.03    7.49
   0 -14 -14   36.64   17.11
   0  14 -15  177.64   35.43
   0  14  15  197.56   44.15
   0  14  15  216.92   54.25
   0  14 -15  159.74   35.20
   0 -14  15  199.60   41.85
   0 -14  15  131.80   26.17
   0 -14 -15  236.98   47.35
   0  14 -16 5586.48  208.19
   0  14  16 6045.49  219.95
   0  14  16 5275.37  195.54
   0  14 -16 5483.24  205.94
   0 -14  16 5682.82  207.49
   0 -14 -16 5600.41  206.26
   0  14 -17 1652.82   88.61
   0  14  17 1757.25   95.92
   0  14 -17 1792.91  165.51
   0 -14 -17 1744.30  108.09
   0 -14  17 1645.28   90.33
   0 -14 -17 1593.15  118.92
   0  14 -18   35.00   11.06
   0  14  18   24.46   10.01
   0  14 -18   61.49   15.28
   0 -14 -18   23.86   23.39
   0 -14  18   22.00    8.13
   0 -14 -18   41.42   18.27
   0  14 -19   64.02   19.25
   0  14  19   36.49   12.34
   0  14 -19  101.41   22.17
   0 -14 -19   85.82   23.82
   0 -14  19   84.95   21.01
   0 -14 -19   32.79   14.40
   0  14 -20 1004.22   29.65
   0  14  20 1000.76   58.47
   0  14 -20 1064.78  144.83
   0 -14 -20 1104.19   97.98
   0 -14  20 1154.77   76.64
   0 -14 -20  958.31   87.38
   0  14 -21   13.82    9.09
   0  14  21   -5.02   10.92
   0  14 -21   24.72   15.23
   0 -14 -21   27.46   12.94
   0 -14  21   46.50   13.19
   0 -14 -21   23.58   16.23
   0  14 -22  147.98   30.20
   0  14  22  162.21   48.54
   0  14 -22  118.41   24.50
   0 -14 -22  186.93   48.77
   0 -14  22  261.53   32.48
   0 -14 -22  226.16   27.77
   0  14 -23  352.09   88.82
   0  14  23  439.70   51.26
   0 -14  23  556.54   56.22
   0 -14 -23  506.50   77.69
   0 -14 -23  450.77   72.00
   0  14 -24 2313.90  108.79
   0  14  24 2085.33  819.79
   0 -14  24 2015.36  795.93
   0 -14 -24 2026.24  798.17
   0 -14 -24 2089.64  821.74
   0  14 -25   -9.23   19.02
   0  14  25   10.81    9.07
   0 -14  25   19.36   11.62
   0 -14 -25   21.75   24.40
   0 -14 -25   18.12   10.18
   0  15   0   13.03    9.53
   0  15   0   -7.70   14.00
   0 -15   0   -1.52    4.92
   0 -15   0   21.04    8.53
   0 -15   0   15.03   10.27
   0  15  -1  494.47   19.13
   0  15   1  559.23   30.92
   0  15  -1  573.42   44.05
   0  15   1  377.14   25.32
   0 -15  -1  488.26   19.85
   0 -15   1  496.11   12.93
   0 -15   1  512.63   44.79
   0 -15  -1  530.04   50.65
   0 -15   1  525.16   43.30
   0  15  -2 6392.26  125.99
   0  15   2 6451.49  130.15
   0  15  -2 6362.35  127.29
   0  15  -2 5656.69  125.53
   0 -15  -2 6556.85  133.29
   0 -15   2 6516.48  143.50
   0  15  -3 1007.68   41.68
   0  15   3 1043.35   43.82
   0  15   3  991.36   46.45
   0  15  -3 1112.25   47.58
   0  15  -3 1129.88   75.98
   0 -15  -3 1101.47   46.77
   0 -15   3  977.27   75.83
   0 -15  -3 1051.52   53.36
   0 -15   3 1074.46   69.51
   0  15  -4 1158.46   47.14
   0  15   4 1162.81   52.30
   0  15  -4 1160.89   55.99
   0  15  -4 1189.14   65.98
   0  15   4 1151.14   53.31
   0 -15  -4 1138.63   51.09
   0 -15   4 1190.39   52.87
   0 -15  -4 1129.53   51.80
   0 -15   4 1290.14   68.84
   0  15  -5 1549.93   62.85
   0  15   5 1604.84   71.13
   0  15  -5 1401.11   66.27
   0  15  -5 1558.43   68.92
   0  15   5 1612.99  314.48
   0 -15  -5 1572.83   80.62
   0 -15   5 1523.30   65.52
   0 -15  -5 1436.32   68.72
   0 -15   5 1571.78   92.61
   0  15  -612765.47  260.78
   0 -15  -612913.26  254.56
   0 -15  -612385.48  251.02
   0 -15   612702.58  265.55
   0  15  -7 4696.48  135.31
   0  15   7 5127.16  146.73
   0  15   7 5028.55  149.99
   0  15  -7 4946.06  143.69
   0  15  -7 5000.62  151.33
   0 -15  -7 4621.13  139.77
   0 -15   7 4763.29  137.90
   0 -15  -7 4807.33  145.27
   0 -15   7 4841.99  150.58
   0  15  -8 2040.74   76.30
   0  15   8 2067.11   78.76
   0  15   8 2164.84  100.31
   0  15  -8 2132.94   82.80
   0  15  -8 2074.74   95.30
   0 -15  -8 2060.07   79.46
   0 -15  -8 2053.45   85.43
   0 -15   8 2096.53   86.81
   0  15  -9  120.21   22.57
   0  15   9  169.75   29.34
   0  15   9  190.27   34.44
   0  15  -9  167.59   29.00
   0  15  -9  138.13   30.75
   0 -15  -9  112.69   25.30
   0 -15   9  113.75   26.43
   0 -15  -9   45.14   10.10
   0 -15   9  168.08   31.63
   0  15 -10 1846.56   79.52
   0  15  10 1854.95   81.46
   0  15  10 1890.73   89.22
   0  15 -10 1830.17   82.77
   0  15 -10 1936.96   94.08
   0 -15 -10 1788.89   78.84
   0 -15  10 1697.90   74.09
   0 -15 -10 1848.24  105.81
   0 -15  10 1991.61   88.66
   0  15 -11    9.41    5.83
   0  15  11   14.20    4.79
   0  15  11   16.42   12.17
   0  15 -11   11.41    6.49
   0  15 -11    4.82   13.19
   0 -15 -11   15.04    8.16
   0 -15  11    4.82    7.72
   0 -15 -11   27.33   12.19
   0 -15  11   13.19    9.14
   0  15 -12 2611.78   89.80
   0  15  12 2917.06  102.74
   0  15 -12 2883.60  111.33
   0  15  12 2838.07  123.80
   0  15 -12 2299.24  100.01
   0 -15 -12 2903.81  108.49
   0 -15  12 2847.31  107.12
   0  15 -13  320.56   46.21
   0  15  13  414.95   78.44
   0  15 -13  407.90   58.39
   0  15  13  395.07   68.51
   0  15 -13  471.05   75.00
   0 -15 -13  442.94   73.00
   0 -15  13  375.91   71.06
   0  15  14 9451.85  307.61
   0  15 -14 8815.99  297.85
   0  15  14 8173.16  287.69
   0  15 -14 8124.47  279.99
   0 -15 -14 8807.68  294.44
   0 -15  14 8886.07  299.45
   0  15  15   57.59   18.70
   0  15  15   12.11   12.70
   0  15 -15    9.41   21.57
   0 -15  15   88.26   21.84
   0 -15 -15   69.09   16.24
   0  15 -16  306.00   46.36
   0  15  16  382.60   63.57
   0  15  16  306.55   39.15
   0  15 -16  311.17   47.97
   0 -15  16  332.95  130.24
   0 -15 -16  386.23   38.60
   0  15 -17  369.29   66.27
   0  15  17  395.02   71.12
   0  15 -17  345.99   50.63
   0 -15  17  440.67   50.71
   0 -15 -17  396.95   60.07
   0  15 -18  849.18   24.28
   0  15  18  803.51   82.15
   0  15 -18  861.45  106.26
   0 -15 -18  915.43  112.09
   0 -15  18  820.36   41.83
   0 -15 -18  914.16   32.05
   0  15 -19 1579.95   42.21
   0  15  19 1766.15   77.09
   0  15 -19 1608.33   53.61
   0 -15 -19 1732.02   89.10
   0 -15  19 1646.48  492.74
   0 -15 -19 1583.73   60.67
   0  15 -20    6.18    5.29
   0  15  20   15.24   10.13
   0  15 -20   21.06   21.91
   0 -15 -20   79.79   27.44
   0 -15  20   20.71   13.71
   0 -15 -20   11.69   20.62
   0  15 -21   34.99   12.57
   0  15  21   67.31   17.19
   0  15 -21   91.83   27.26
   0 -15 -21   67.92   30.39
   0 -15  21  112.49   16.27
   0 -15 -21   31.08   15.69
   0  15 -22 2527.87  111.80
   0  15  22 2574.85  112.52
   0 -15  22 2758.24  176.32
   0 -15 -22 2742.27  130.05
   0 -15 -22 2560.23  110.81
   0  15 -23   32.25   22.31
   0  15  23   27.07   11.74
   0 -15  23   56.01   11.26
   0 -15 -23   22.16   26.63
   0 -15 -23   48.28   14.90
   0  15 -24  192.94   38.24
   0  15  24  148.07   34.91
   0 -15  24  201.85   28.08
   0 -15 -24  132.45   23.91
   0 -15 -24  131.01   27.51
   0  15 -25  181.18   50.18
   0  15  25  160.70   44.26
   0 -15  25  219.55   44.85
   0 -15 -25  167.17   48.84
   0 -15 -25  127.21   32.25
   0  16   0 5036.62  153.38
   0  16   0 4636.11  148.08
   0 -16   0 4977.06  151.09
   0 -16   0 4909.85  156.37
   0  16   1  284.07   28.20
   0  16  -1  258.66   33.96
   0  16  -1  294.74   34.10
   0  16   1  262.23   44.71
   0 -16  -1  227.48   21.46
   0 -16   1  208.97   18.82
   0 -16   1  289.54   59.86
   0 -16  -1  239.26   48.83
   0  16  -2 5696.36  113.97
   0  16   2 5448.87  164.84
   0  16  -2 5775.06  120.62
   0  16  -2 5556.51 1050.82
   0 -16  -2 5923.03  119.92
   0 -16  -2 5776.36  126.41
   0 -16   2 5521.67 1042.01
   0  16  -3 2055.27   79.09
   0  16   3 2075.69   82.09
   0  16   3 2143.01  112.67
   0  16  -3 2158.39   84.32
   0  16  -3 2021.80   81.94
   0 -16  -3 2055.07   78.82
   0 -16  -3 1946.95   83.96
   0 -16   3 2001.16  106.48
   0  16  -4 7836.47  158.62
   0  16   4 8159.45  167.13
   0  16   4 8133.07  183.09
   0  16  -4 8037.69  164.35
   0  16  -4 7918.48  171.13
   0 -16  -4 7519.21  154.66
   0 -16  -4 7579.43  165.12
   0 -16   4 8126.94  181.63
   0  16  -5 3065.72   89.06
   0  16   5 3144.27   93.40
   0  16  -5 3009.87   94.00
   0  16  -5 2962.50   93.60
   0  16   5 3070.92  112.24
   0 -16  -5 3095.29   91.49
   0 -16  -5 3170.90   98.77
   0 -16   5 3056.58   98.75
   0  16  -6  270.09   19.21
   0  16   6  299.57   20.03
   0  16   6  374.95   65.81
   0  16  -6  356.03   41.91
   0  16  -6  333.79   38.94
   0 -16  -6  289.24   27.26
   0 -16  -6  372.07   58.44
   0 -16   6  394.64   73.58
   0  16  -7 1250.05   75.54
   0  16   7 1246.53   80.64
   0  16   7 1285.89  167.79
   0  16  -7 1368.10   60.89
   0  16  -7 1472.04  119.81
   0 -16  -7 1358.56   63.15
   0 -16  -7 1315.35   61.67
   0 -16   7 1319.42   62.87
   0  16  -8 2579.07   97.68
   0  16   8 2598.82  107.51
   0  16   8 2588.82  104.91
   0  16  -8 2621.50  103.75
   0  16  -8 2670.45  106.54
   0 -16  -8 2499.43   97.02
   0 -16  -8 2629.17  123.63
   0 -16   8 2628.53  105.86
   0  16  -9  507.15   43.23
   0  16   9  535.54   43.46
   0  16   9  608.75   96.66
   0  16  -9  588.91   69.70
   0  16  -9  676.94   77.50
   0 -16  -9  429.56   65.72
   0 -16  -9  656.55   84.91
   0 -16   9  593.27   50.84
   0  16 -10  150.64   32.58
   0  16  10  232.87   44.89
   0  16  10  300.06   60.77
   0  16 -10  240.55   41.69
   0  16 -10  243.24   46.17
   0 -16 -10  164.41   40.98
   0 -16 -10  220.72   38.16
   0 -16  10  302.13   52.45
   0  16 -11   82.95   20.55
   0  16  11  190.90   34.27
   0  16 -11  178.22   30.14
   0  16  11  221.86   45.52
   0  16 -11  218.66   40.41
   0 -16 -11  207.82   33.39
   0 -16  11  167.63   29.10
   0  16  12 7688.43  252.85
   0  16 -12 7261.96  241.09
   0  16  12 6848.53  227.95
   0  16 -12 7119.80  242.50
   0 -16 -12 7475.32  248.61
   0 -16  12 7060.83  233.88
   0  16  13  593.85   72.70
   0  16 -13  465.23   36.04
   0  16 -13  526.27   32.85
   0  16  13  601.95   71.72
   0  16 -13  654.96  101.84
   0 -16 -13  685.05   77.12
   0 -16  13  529.80   95.17
   0  16  14 1693.84   80.64
   0  16 -14 1675.75   84.02
   0  16  14 1817.18  115.46
   0  16 -14 1685.48  116.40
   0 -16 -14 1780.74  162.43
   0 -16  14 1614.55   83.49
   0  16  15 1743.61   95.71
   0  16 -15 1575.82  100.65
   0  16  15 1600.40   94.31
   0  16 -15 1718.13  140.14
   0 -16 -15 1743.23   97.11
   0 -16  15 1571.30   87.21
   0  16  16  970.83   36.73
   0  16 -16  820.33   61.26
   0  16  16  973.96  102.38
   0  16 -16  825.79   52.20
   0 -16 -16  948.70   74.26
   0 -16  16  936.35   38.77
   0  16  17  603.38   57.35
   0  16  17  630.03   78.25
   0  16 -17  561.11   87.89
   0 -16 -17  558.08   72.88
   0 -16  17  655.25   33.40
   0  16 -18  454.78   70.06
   0  16  18  321.49   65.78
   0 -16  18  364.86   67.43
   0 -16 -18  382.90   69.66
   0 -16 -18  392.57   61.76
   0 -16  18  341.09   64.48
   0  16 -19   70.40   21.06
   0  16  19   79.13   25.96
   0 -16  19  131.25   23.76
   0 -16 -19  112.25   28.50
   0 -16 -19  129.52   25.02
   0  16 -20  598.68  130.78
   0  16  20  731.92   87.95
   0 -16  20  790.02   46.62
   0 -16 -20  648.92  133.26
   0 -16 -20  754.49   81.39
   0  16 -21  322.82   57.13
   0  16  21  297.40   71.00
   0 -16  21  454.18   42.59
   0 -16 -21  438.17   50.44
   0 -16 -21  308.22   63.11
   0  16 -22  253.12   42.98
   0  16  22  209.02   57.96
   0 -16  22  302.95   38.58
   0 -16 -22  229.95   41.85
   0 -16 -22  188.69   53.34
   0  16 -23   43.18   17.44
   0  16  23   94.77   15.28
   0 -16  23  188.75   23.61
   0 -16 -23  112.78   34.80
   0 -16 -23   87.72   20.78
   0  16  24 2704.70  158.18
   0  16 -24 2583.43  156.28
   0 -16 -24 2665.91  181.77
   0 -16 -24 2347.94  160.77
   0  17   0   -0.35   13.48
   0 -17   0   10.97    4.77
   0 -17   0   19.80    6.94
   0  17   1  897.20   52.05
   0  17  -1  973.33   61.78
   0  17   1  664.72   63.73
   0  17  -1  962.16   63.62
   0 -17   1 1070.08   66.21
   0 -17  -1  929.50   66.03
   0  17   2 3679.97  106.26
   0  17  -2 3572.72  106.78
   0  17  -2 3559.37  110.34
   0 -17  -2 3405.65  108.56
   0 -17   2 3614.30  111.33
   0  17  -3 4230.42  120.36
   0  17   3 4206.73  123.07
   0  17  -3 4014.61  116.60
   0  17  -3 4299.52  134.03
   0  17   3 4097.29  123.24
   0 -17  -3 4085.73  122.57
   0 -17  -3 3984.46  156.44
   0 -17   3 3956.80  120.33
   0  17  -4 1239.23   75.70
   0  17   4 1198.94   73.66
   0  17  -4 1150.87   70.67
   0  17  -4 1123.85   81.30
   0  17   4 1224.98   78.28
   0 -17  -4 1205.41   74.72
   0 -17  -4 1156.18   90.84
   0 -17   4 1248.69   81.00
   0  17  -5 3961.69  128.30
   0  17   5 4001.12  132.36
   0  17  -5 3965.65  126.18
   0  17  -5 3884.76  131.62
   0  17   5 3818.02  158.10
   0 -17  -5 3856.53  124.45
   0 -17  -5 3889.42  130.50
   0 -17   5 3919.28  154.35
   0  17  -6 1995.76   86.42
   0  17   6 2226.90   87.93
   0  17   6 2203.90   89.51
   0  17  -6 1997.03   87.54
   0  17  -6 2021.93  113.95
   0 -17  -6 2061.44   88.88
   0 -17  -6 2059.97   94.35
   0 -17   6 2033.35   94.43
   0  17  -7 1000.06   61.93
   0  17   7 1075.25   75.29
   0  17  -7 1056.51   71.56
   0  17   7 1128.25   74.32
   0  17  -7 1146.53   83.57
   0 -17  -7 1130.62   90.24
   0 -17   7 1197.93   78.06
   0  17  -8 1447.20   76.18
   0  17   8 1530.19   87.68
   0  17   8 1482.76   93.29
   0  17  -8 1583.65   85.08
   0  17  -8 1580.78   96.92
   0 -17  -8 1434.32   87.20
   0 -17  -8 1600.91   95.54
   0 -17   8 1594.92   90.45
   0  17  -9 1675.75   88.03
   0  17   9 1689.01   94.84
   0  17   9 1801.01   88.32
   0  17  -9 1780.68   76.50
   0  17  -9 1849.60  155.48
   0 -17  -9 1558.62   86.13
   0 -17  -9 1748.28   84.05
   0 -17   9 1709.20   53.29
   0  17 -10 1176.80   63.98
   0  17  10 1196.53  127.07
   0  17  10 1149.44   74.46
   0  17 -10 1131.92   70.42
   0  17 -10 1266.40  101.08
   0 -17 -10 1075.37   61.53
   0 -17 -10 1155.59  103.61
   0 -17  10 1223.94   68.66
   0  17 -11 1365.30   68.51
   0  17  11 1601.95   82.38
   0  17 -11 1507.12   79.93
   0  17  11 1623.46   87.81
   0  17 -11 1553.36   85.70
   0 -17 -11 1645.38   89.31
   0 -17  11 1549.35   86.08
   0  17 -12  968.76   49.04
   0  17  12 1083.15   62.81
   0  17 -12 1140.23  439.81
   0  17  12 1113.02  102.77
   0  17 -12 1138.84   79.40
   0 -17 -12 1300.70  100.67
   0 -17  12 1235.86   64.35
   0  17 -13  113.10   53.11
   0  17  13  233.70   47.05
   0  17 -13  250.18   49.13
   0  17  13  216.07   45.27
   0  17 -13  219.01   37.99
   0 -17 -13  247.08   40.30
   0 -17  13  235.43   49.01
   0  17  14 2325.09  103.85
   0  17 -14 2187.41   97.73
   0  17  14 2299.25  115.22
   0  17 -14 2066.97  120.09
   0 -17 -14 2079.09  100.56
   0 -17  14 2074.33   91.90
   0  17  15  327.11   63.02
   0  17 -15  369.06   59.15
   0  17  15  365.72   50.27
   0  17 -15  334.27   58.35
   0 -17 -15  425.70   54.76
   0 -17  15  360.83   52.98
   0  17  16  113.65   22.92
   0  17 -16   86.09   16.92
   0  17  16  164.57   24.18
   0  17 -16   86.44   21.81
   0 -17 -16  133.75   29.53
   0 -17  16  118.78   20.49
   0  17  17 2230.09   94.80
   0  17 -17 2008.04  104.20
   0  17  17 1897.62   84.43
   0  17 -17 2059.46  104.86
   0 -17 -17 2267.14   97.23
   0 -17  17 2103.73   89.13
   0  17  18   75.59   18.90
   0  17 -18  100.24   19.91
   0  17 -18   98.56   24.67
   0 -17 -18   59.10   14.98
   0 -17  18   42.31   16.63
   0  17  19   84.35   18.75
   0  17 -19  106.60   20.18
   0  17 -19   29.05   11.49
   0 -17 -19  137.01   35.51
   0 -17 -19   71.68   22.96
   0 -17  19   69.17   15.69
   0  17  20   11.59    9.69
   0  17 -20   42.63   13.95
   0 -17 -20  -14.67   24.88
   0 -17 -20   14.16   11.61
   0 -17  20   11.81    8.41
   0  17 -21   44.63   23.24
   0  17  21   78.52   19.99
   0 -17  21   34.91   11.18
   0 -17 -21   24.43   18.04
   0 -17 -21   67.38   22.27
   0 -17  21   39.53   11.67
   0  17 -22 1490.16  174.76
   0  17  22 1715.46  104.70
   0 -17  22 1873.26  814.68
   0 -17 -22 1673.70  123.95
   0 -17 -22 1678.16  106.06
   0  17 -23  887.51  174.54
   0  17  23 1348.00   86.79
   0 -17  23 1195.39  102.55
   0 -17 -23 1161.12  120.89
   0 -17 -23 1197.75  113.29
   0  18   0  595.40   46.69
   0  18   0  719.46  105.76
   0 -18   0  547.65   45.43
   0 -18   0  630.39   62.37
   0  18  -1 2376.91   90.49
   0  18   1 2408.62   92.64
   0  18  -1 2315.88   91.29
   0  18  -1 2626.23  108.06
   0 -18  -1 2372.18   92.89
   0 -18   1 2459.28   99.00
   0 -18  -1 2368.42  122.70
   0  18   2  716.37   55.55
   0  18  -2  630.54   48.76
   0  18  -2  749.67   73.50
   0  18   2  731.82  104.32
   0 -18  -2  605.09   49.86
   0 -18  -2  705.25   93.26
   0 -18   2  650.65   65.28
   0  18  -3  303.31   32.52
   0  18   3  307.17   30.33
   0  18  -3  311.75   40.01
   0  18   3  344.71   65.08
   0 -18  -3  255.24   39.06
   0 -18  -3  327.07   60.87
   0 -18   3  365.31   59.69
   0  18  -4  309.27   45.21
   0  18   4  361.19   44.91
   0  18   4  474.27   64.14
   0  18  -4  367.00   49.98
   0  18  -4  384.78   65.25
   0 -18  -4  302.97   49.59
   0 -18  -4  372.02   76.54
   0 -18   4  423.35   86.09
   0  18  -5 1685.55   89.32
   0  18   5 1769.91   74.07
   0  18   5 1738.78   79.72
   0  18  -5 1825.81   79.07
   0  18  -5 1902.31   86.80
   0 -18  -5 1783.53   75.77
   0 -18  -5 1610.22   89.85
   0 -18   5 1757.19   83.00
   0  18  -6    9.68    7.11
   0  18   6   13.63    6.45
   0  18  -6    5.31    3.32
   0  18  -6   -2.64   14.36
   0  18   6   31.96   11.58
   0 -18  -6    6.92    6.18
   0 -18  -6    9.19   19.46
   0 -18   6   -6.53   14.19
   0  18  -7 4595.91  159.86
   0  18   7 4636.95  169.59
   0  18   7 4588.47  166.58
   0  18  -7 4690.08  166.64
   0  18  -7 4657.71  171.25
   0 -18  -7 4490.49  166.55
   0 -18  -7 4602.11  172.83
   0 -18   7 4577.79  170.08
   0  18  -8 1176.64   62.62
   0  18   8 1203.92   63.78
   0  18   8 1193.01  122.93
   0  18  -8 1120.88   65.99
   0  18  -8 1183.41   97.32
   0 -18  -8 1160.07   66.81
   0 -18  -8 1179.92   75.96
   0 -18   8 1261.39   69.72
   0  18  -9   11.20    4.72
   0  18   9   19.15    7.27
   0  18  -9   10.13    5.28
   0  18   9   34.19   10.78
   0  18  -9   43.11   17.62
   0 -18  -9   18.89   10.75
   0 -18   9   28.86   14.95
   0  18 -10   -0.18    3.36
   0  18  10    6.40    5.12
   0  18 -10   11.04    9.72
   0  18  10    6.01   13.94
   0  18 -10    7.46   13.84
   0 -18 -10   16.40    8.84
   0 -18  10    7.90    9.41
   0  18 -11   82.33   26.23
   0  18  11  139.18   28.56
   0  18 -11  141.63   25.94
   0  18  11  157.39   32.89
   0  18 -11  142.72   29.35
   0 -18 -11  114.78   27.18
   0 -18  11  165.32   34.22
   0  18 -12   95.32   27.60
   0  18  12  182.59   38.63
   0  18 -12  171.40   34.33
   0  18  12  202.65   39.22
   0  18 -12  259.57   38.00
   0 -18 -12  180.80   39.66
   0 -18  12  182.47   36.39
   0  18  13 4646.56  195.86
   0  18 -13 4689.59  187.00
   0  18  13 5010.34  204.49
   0  18 -13 4798.65  196.13
   0 -18 -13 4949.88  203.11
   0 -18  13 4577.42  182.85
   0  18  14  959.19   26.18
   0  18 -14  868.13   28.39
   0  18  14  873.70   71.80
   0  18 -14  981.43   85.50
   0 -18 -14  821.40   30.40
   0 -18  14  899.70   76.31
   0  18  15 1002.06   28.69
   0  18 -15 1092.36   32.51
   0  18  15  956.72   32.27
   0  18 -15 1003.86  117.03
   0 -18 -15 1017.84   37.18
   0 -18  15  930.66   44.60
   0  18  16   23.08   10.38
   0  18 -16   35.14   14.36
   0  18  16   68.56   15.02
   0  18 -16   47.51   19.21
   0 -18 -16   33.46   14.79
   0 -18  16   39.03   14.27
   0  18  17    8.77    7.45
   0  18 -17   14.77   15.48
   0  18  17   -1.75   10.87
   0 -18 -17   10.40    9.60
   0 -18  17    9.84   12.91
   0  18  18  115.50   23.49
   0  18 -18   78.80   30.23
   0  18  18  164.38   28.75
   0  18 -18  137.75   34.89
   0 -18 -18  162.09   37.70
   0 -18  18  111.21   29.55
   0  18  19  482.97   50.47
   0  18 -19  364.46   80.56
   0  18 -19  386.82   77.57
   0 -18 -19  455.51   82.52
   0 -18 -19  299.93   97.87
   0 -18  19  324.22   82.61
   0  18  20  448.68   90.20
   0  18 -20  445.46  104.23
   0  18 -20  461.93   91.85
   0 -18 -20  438.73  110.66
   0 -18 -20  503.05   62.64
   0 -18  20  398.97   76.37
   0  18  21  926.55   79.33
   0  18 -21  740.96   79.59
   0  18 -21  790.96  147.07
   0 -18 -21  647.23  146.67
   0 -18 -21  725.64  112.00
   0  18  22   82.66   18.14
   0  18 -22   96.11   28.59
   0  18 -22  102.90   21.46
   0 -18 -22   38.60   34.74
   0 -18 -22   73.51   27.05
   0  18  23  249.35   62.56
   0  18 -23  273.28   64.53
   0  18 -23  257.24   91.01
   0 -18 -23  286.75  103.17
   0 -18 -23  229.25   76.38
   0  19   0   16.64    8.35
   0  19   0   22.03   12.40
   0 -19   0   10.15    4.68
   0 -19   0   34.09   12.50
   0  19  -1    8.47    3.99
   0  19   1    8.21    4.94
   0  19  -1   11.36    3.71
   0  19  -1    6.68   10.35
   0  19   1   22.25   16.04
   0 -19  -1   16.40    5.74
   0 -19  -1   31.69   12.12
   0 -19   1   35.82   13.82
   0  19  -2    9.14    4.89
   0  19   2    7.97    5.21
   0  19  -2   15.21    5.47
   0  19   2   10.23   17.41
   0  19  -2    9.27    8.02
   0 -19  -2   22.91   14.69
   0 -19   2   14.74    7.35
   0  19  -3 2393.07   97.65
   0  19   3 2289.74   98.49
   0  19  -3 2304.11   97.83
   0  19  -3 2533.66   94.33
   0  19   3 2509.07   92.95
   0 -19  -3 2298.39   96.82
   0 -19  -3 2305.20  118.11
   0 -19   3 2523.90   94.21
   0  19  -4    9.63    3.72
   0  19   4   36.31    8.83
   0  19  -4   30.24    8.02
   0  19  -4   29.65   15.03
   0  19   4   25.31    9.89
   0 -19  -4   19.42    9.07
   0 -19  -4   17.46    7.46
   0 -19   4   27.87   12.39
   0  19   5  881.98   50.68
   0  19  -5  863.37   49.32
   0  19  -5  892.02   59.75
   0  19   5  896.51   55.30
   0 -19  -5  792.76   51.78
   0 -19  -5  908.67   69.17
   0 -19   5  893.46   55.66
   0  19  -6   28.48    6.08
   0  19   6   55.18   13.36
   0  19  -6   37.80   10.07
   0  19   6   28.34   14.49
   0  19  -6   49.28   16.09
   0 -19  -6   48.17   15.47
   0 -19   6   21.34   14.14
   0  19  -7    2.62    2.93
   0  19  -7   20.74    8.04
   0  19  -7   22.68   14.71
   0  19   7   13.76   11.67
   0 -19  -7    3.09    9.01
   0 -19  -7   31.85   12.83
   0 -19   7   10.88    9.12
   0  19  -8 1000.52   52.54
   0  19   8 1093.55   70.41
   0  19   8 1110.98   69.42
   0  19  -8 1092.75   56.35
   0  19  -8 1029.49   81.78
   0 -19  -8 1058.89   57.94
   0 -19  -8 1203.59  104.97
   0 -19   8 1050.07   81.89
   0  19  -9 1191.79   56.03
   0  19   9 1247.48   66.97
   0  19  -9 1229.70   60.10
   0  19  -9 1322.82   82.81
   0  19   9 1286.70   67.56
   0 -19  -9 1224.23   61.61
   0 -19  -9 1282.46   68.37
   0 -19   9 1397.64   74.77
   0  19 -10   62.33   15.89
   0  19  10  103.99   28.89
   0  19 -10   99.08   23.35
   0  19  10  170.55   34.96
   0  19 -10  149.23   35.02
   0 -19 -10  132.09   30.53
   0 -19  10  100.89   25.60
   0  19 -11 1499.61   81.58
   0  19  11 1783.30   95.71
   0  19 -11 1751.21   94.71
   0  19  11 1805.72  100.82
   0  19 -11 1775.33  100.79
   0 -19 -11 1766.95  117.09
   0 -19  11 1791.14   99.72
   0  19  12   79.01   21.27
   0  19 -12   65.00   15.54
   0  19  12   95.21   15.92
   0  19 -12  104.26   17.61
   0 -19 -12  104.65   22.80
   0 -19  12   69.42   14.09
   0  19  13   45.42   14.61
   0  19 -13   35.34   14.24
   0  19  13   53.10   10.76
   0  19 -13   59.53   16.09
   0 -19 -13   66.95   16.19
   0 -19  13   72.65   17.26
   0  19  14   58.69   18.27
   0  19 -14   46.03   12.29
   0  19  14   79.67   14.50
   0  19 -14   44.04   18.76
   0 -19 -14  113.76   16.58
   0 -19  14   48.31   16.61
   0  19  15  737.98   27.25
   0  19 -15  644.79   30.97
   0  19  15  816.16   96.62
   0  19 -15  736.78  115.59
   0 -19 -15  734.82   81.21
   0 -19  15  647.29   51.56
   0  19  16 1226.53   33.03
   0  19 -16 1052.50   30.86
   0  19  16 1199.74  110.16
   0  19 -16 1030.87  112.52
   0 -19 -16 1061.02   96.28
   0 -19  16 1000.67   51.56
   0  19  17  923.26   30.92
   0  19 -17  829.86   32.42
   0  19  17  826.31   82.75
   0  19 -17  812.48  109.65
   0 -19 -17  687.89   88.79
   0 -19  17  824.26   48.00
   0  19  18  174.21   42.50
   0  19 -18  174.37   38.13
   0  19  18  211.23   32.95
   0  19 -18  185.20   41.88
   0 -19 -18  154.95   31.93
   0 -19  18  195.46   43.46
   0  19  19    1.00    9.21
   0  19 -19    3.22   10.70
   0  19 -19   12.69   11.57
   0 -19 -19   56.97   20.72
   0 -19 -19   16.00   11.60
   0 -19  19   -5.44   11.93
   0  19  20   67.57   22.44
   0  19 -20   33.44    9.29
   0  19 -20   98.47   27.41
   0 -19 -20   71.71   28.45
   0 -19 -20   83.39   18.60
   0  19  21  118.28   41.52
   0  19 -21  192.14   33.74
   0 -19 -21  116.95   51.32
   0  19  22   24.39    9.09
   0  19 -22   30.06   14.14
   0  19 -22   42.84   12.68
   0 -19 -22   48.20   21.10
   0  20   0   32.37    9.08
   0  20   0   58.94   15.61
   0 -20   0   49.05   17.37
   0  20  -1  911.37   49.36
   0  20   1  875.59   54.47
   0  20  -1  902.96   49.55
   0  20  -1  985.41  103.20
   0  20   1  778.82   96.66
   0 -20  -1  799.25   52.20
   0 -20  -1  924.10   56.71
   0 -20   1  934.46   62.75
   0  20  -2  392.56   43.18
   0  20   2  456.34   47.40
   0  20  -2  414.28   46.25
   0  20  -2  545.59   96.10
   0  20   2  513.18   44.84
   0 -20  -2  324.12   47.51
   0 -20  -2  468.47   81.98
   0 -20   2  446.84   95.40
   0  20  -3   98.90   24.44
   0  20   3  133.39   34.24
   0  20  -3  141.38   30.15
   0  20   3  204.48   50.46
   0  20  -3  209.06   44.79
   0 -20  -3  138.69   41.01
   0  20  -4  431.00   23.36
   0  20   4  465.83   27.56
   0  20  -4  423.11   42.40
   0  20  -4  506.40   77.01
   0  20   4  517.45   64.58
   0 -20  -4  386.52   25.31
   0 -20  -4  442.79   68.79
   0 -20   4  447.09   69.24
   0  20  -5  735.12   52.50
   0  20   5  844.71   43.95
   0  20  -5  685.30   54.54
   0  20  -5  855.92  121.10
   0  20   5  866.46   59.05
   0 -20  -5  637.58   45.74
   0 -20  -5  804.69   80.52
   0 -20   5  796.51   70.24
   0  20   6  562.01   42.82
   0  20  -6  586.06   49.99
   0  20   6  590.95   83.97
   0  20  -6  609.47   83.64
   0 -20  -6  674.48  101.50
   0 -20   6  658.07   89.21
   0  20  -7  556.66   45.02
   0  20   7  714.68   50.32
   0  20  -7  695.38   68.68
   0  20  -7  689.91   68.55
   0  20   7  768.48   70.54
   0 -20  -7  510.80   55.26
   0 -20  -7  769.53   92.86
   0 -20   7  603.25   98.08
   0  20  -8  156.98   33.80
   0  20   8  259.62   41.05
   0  20   8  357.87   50.68
   0  20  -8  250.62   32.12
   0  20  -8  270.35   51.62
   0 -20  -8  137.26   42.11
   0 -20  -8  276.03   35.68
   0 -20   8  274.21   55.07
   0  20   9  120.15   28.61
   0  20  -9  144.02   37.97
   0  20   9  170.73   36.90
   0  20  -9  179.12   36.06
   0 -20  -9  165.53   36.11
   0 -20   9  142.64   32.03
   0  20  10   10.13    7.86
   0  20  10   -3.50    8.84
   0  20 -10   23.20   19.69
   0 -20 -10   11.59   12.63
   0 -20  10   16.14    7.94
   0  20  11   -0.06    8.53
   0  20 -11   -1.87    8.96
   0  20  11   18.23   14.90
   0  20 -11    8.37    8.92
   0 -20 -11   -1.22   16.17
   0 -20  11    6.13    7.03
   0  20  12  367.02   47.22
   0  20 -12  303.11   62.19
   0  20  12  410.40   62.49
   0  20 -12  351.68   65.77
   0 -20 -12  355.85   54.41
   0 -20  12  362.30   61.03
   0  20  13  687.36   30.35
   0  20 -13  590.29   59.55
   0  20  13  769.07   80.20
   0  20 -13  789.58   64.80
   0 -20 -13  763.51   78.02
   0 -20  13  563.44   87.90
   0  20  14  167.81   34.85
   0  20 -14  135.33   63.15
   0  20  14  268.19   32.66
   0  20 -14  205.70   32.25
   0 -20 -14  203.27   44.77
   0 -20  14  155.24   37.19
   0  20  15  161.46   43.10
   0  20 -15  153.53   42.35
   0  20  15  190.87   30.23
   0  20 -15  235.98   62.16
   0 -20 -15  215.90   50.37
   0 -20  15  195.71   34.62
   0  20  16   11.16    7.18
   0  20 -16   22.54    8.96
   0  20  16   40.38   19.09
   0  20 -16   28.81   19.99
   0 -20 -16    1.71   12.53
   0 -20  16   11.81    7.09
   0  20  17   56.41   15.03
   0  20  17   91.39   18.94
   0  20 -17   42.37   25.39
   0 -20  17   38.77   10.74
   0  20  18 1455.99   80.44
   0  20 -18 1244.18  102.69
   0  20  18 1506.36   85.80
   0  20 -18 1369.00  559.00
   0 -20 -18 1455.66   99.61
   0 -20  18 1277.33  106.18
   0  20  19  118.90   45.00
   0  20 -19  133.66   38.21
   0  20 -19  179.58   37.71
   0 -20 -19  122.47   36.40
   0 -20  19  104.74   32.11
   0  20  20   19.21   11.06
   0  20 -20    8.41    8.63
   0  20 -20   20.46   21.02
   0 -20 -20   36.26   20.57
   0 -20 -20   -1.53   10.10
   0  20  21  277.82   79.42
   0  20 -21  319.77  103.50
   0 -20 -21  345.28  113.27
   0 -20 -21  242.77   98.52
   0  21   0    7.37    3.60
   0  21   0    5.87    2.36
   0  21   0   34.43   15.63
   0 -21   0   21.90   14.92
   0  21  -1  128.18   26.81
   0  21   1  162.24   36.04
   0  21  -1  149.31   34.84
   0  21  -1  223.59   44.58
   0  21   1  183.06   38.48
   0 -21  -1  131.16   31.73
   0 -21  -1  201.84   62.49
   0 -21   1  186.27   47.02
   0  21  -2   44.14   10.41
   0  21   2   44.66   13.16
   0  21  -2   34.84   11.60
   0  21  -2   62.38   22.83
   0  21   2   48.57   16.11
   0 -21  -2   45.40   11.36
   0 -21  -2   56.79   21.82
   0 -21   2   79.41   25.35
   0  21  -3   51.71   15.72
   0  21   3   87.27   23.35
   0  21  -3   78.73   18.43
   0  21  -3  103.64   25.28
   0  21   3   99.84   25.54
   0 -21  -3   45.66   14.91
   0 -21  -3   87.33   19.20
   0 -21   3  137.92   29.60
   0  21  -4   25.03   10.50
   0  21   4   29.06   10.23
   0  21  -4   35.59   10.38
   0  21  -4   51.20   22.33
   0  21   4   26.11   16.82
   0 -21  -4   10.66    8.33
   0 -21  -4   23.93   18.49
   0 -21   4   62.84   20.09
   0  21   5  389.78   27.16
   0  21  -5  363.08   22.15
   0  21  -5  325.36   61.82
   0  21   5  450.49   54.98
   0 -21  -5  269.11   34.16
   0 -21  -5  380.16   53.60
   0 -21   5  476.85   83.96
   0  21   6   11.52    5.47
   0  21  -6    1.86    4.54
   0  21   6  -29.48   13.90
   0  21  -6   10.49   11.29
   0 -21  -6   10.02   12.97
   0 -21   6   24.54   16.94
   0  21   7  414.54   18.01
   0  21  -7  401.38   30.00
   0  21   7  423.82   73.74
   0  21  -7  372.62   61.91
   0 -21  -7  417.81   68.15
   0 -21   7  389.63   75.68
   0  21   8 1162.29   37.05
   0  21   8 1047.09   74.70
   0  21  -8 1207.18  113.07
   0 -21  -8 1127.17   64.61
   0 -21   8 1098.37   75.15
   0  21   9    3.01    7.43
   0  21   9   16.06    7.15
   0  21  -9    1.99    9.07
   0 -21  -9   -5.67   13.84
   0 -21   9    1.03    8.61
   0  21  10   12.78    5.63
   0  21 -10   -0.47    7.23
   0  21  10   29.39   13.54
   0  21 -10   11.93    9.10
   0 -21 -10   -5.85   13.03
   0 -21  10   35.64   16.52
   0  21  11   61.42   19.98
   0  21 -11   30.03    7.69
   0  21  11   68.42   19.94
   0  21 -11   79.28   26.65
   0 -21 -11   68.08   16.00
   0 -21  11   93.62   20.13
   0  21  12  140.18   37.81
   0  21 -12  153.75   33.99
   0  21  12  220.07   43.52
   0  21 -12  184.66   36.27
   0 -21 -12  188.87   29.19
   0 -21  12  200.41   42.02
   0  21  13   57.94   13.07
   0  21 -13   50.12   11.51
   0  21  13   38.85   10.25
   0  21 -13   35.86   15.15
   0 -21 -13   65.90   18.99
   0 -21  13   35.66   12.58
   0  21  14  752.42   24.56
   0  21 -14  629.48   26.67
   0  21  14  816.87   84.98
   0  21 -14  795.82   46.77
   0 -21 -14  639.60   84.92
   0 -21  14  630.88   31.70
   0  21  15   77.56   18.25
   0  21 -15   58.16   16.94
   0  21  15   64.21   16.21
   0 -21 -15   61.85   30.76
   0 -21  15   39.35   14.81
   0  21  16 1458.30   82.94
   0  21 -16 1408.15   77.74
   0  21  16 1437.60   76.43
   0  21 -16 1565.33  107.19
   0 -21 -16 1094.23  160.28
   0 -21  16 1388.68   83.53
   0  21  17   -8.10    8.77
   0  21 -17    1.51    4.05
   0  21  17   17.88   14.04
   0  21 -17   11.10   17.36
   0 -21 -17   17.54    9.22
   0 -21  17   28.08    7.51
   0  21  18  231.83   75.29
   0  21  18  327.82   59.94
   0  21 -18  227.10   67.73
   0 -21 -18  247.59   72.61
   0 -21  18  268.64   71.73
   0  21  19  666.11   69.59
   0  21  19  591.45  125.02
   0  21 -19  476.63  138.66
   0 -21 -19  480.16  114.66
   0 -21  19  344.91  104.38
   0  21  20   15.63    8.56
   0  21 -20   34.15   12.58
   0 -21 -20   46.28   20.17
   0 -21 -20   44.26   20.46
   0  22   0  387.76   16.38
   0  22   0  474.86   50.58
   0 -22   0  423.04   54.62
   0  22   1  204.78   45.67
   0  22  -1  183.63   42.76
   0  22   1  155.01   37.57
   0  22  -1  248.37   50.36
   0 -22   1  191.49   40.60
   0 -22  -1  269.42   43.28
   0  22   2   55.70   22.67
   0  22  -2   38.09   10.21
   0  22   2   73.09   19.54
   0  22  -2   39.59   14.88
   0 -22  -2   57.56   24.71
   0 -22   2   29.99   16.24
   0  22   3   76.83   19.86
   0  22  -3   80.68   19.55
   0  22   3  146.33   25.21
   0  22  -3  115.22   21.67
   0 -22  -3  111.26   21.78
   0 -22   3  107.03   19.13
   0  22  -4   11.22    7.87
   0  22   4    9.47    9.52
   0  22  -4   11.85   10.77
   0 -22  -4   40.50   19.66
   0 -22   4    1.43    6.81
   0  22   5   11.62    9.64
   0  22  -5   17.87    8.24
   0  22   5   19.13   10.72
   0  22  -5   -6.40   15.11
   0 -22  -5   35.32   23.33
   0 -22   5   12.24   14.42
   0  22   6  531.47   26.21
   0  22  -6  561.04   16.23
   0  22   6  520.13   89.13
   0  22  -6  566.35   47.00
   0 -22  -6  585.43   90.59
   0 -22   6  557.49   74.25
   0  22   7  261.11   46.71
   0  22  -7  257.24   29.35
   0  22   7  305.10   60.53
   0  22  -7  263.66   74.89
   0 -22  -7  329.85   52.91
   0 -22   7  256.39   54.89
   0  22   8   57.19   17.97
   0  22  -8   55.30   16.31
   0  22   8  125.55   20.07
   0  22  -8   91.80   19.18
   0 -22  -8  103.59   36.15
   0 -22   8  103.89   37.28
   0  22   9  229.00   37.94
   0  22  -9  196.76   39.93
   0  22   9  278.41   57.19
   0  22  -9  224.26   45.93
   0 -22  -9  313.65   66.28
   0 -22   9  291.98   55.04
   0  22  10   21.54   10.14
   0  22 -10   12.26    6.94
   0  22  10   35.68   11.75
   0  22 -10   23.81   11.06
   0 -22 -10   41.42   16.66
   0 -22  10   32.06   18.26
   0  22  11   -7.48    8.10
   0  22  11   29.32   13.85
   0  22 -11   25.18   10.28
   0 -22 -11   11.70   12.46
   0 -22  11   -9.72   13.12
   0  22  12    7.67    7.30
   0  22 -12    6.71    6.93
   0  22  12    1.43    8.12
   0  22 -12   27.74   10.32
   0 -22 -12   14.45   10.70
   0 -22  12   18.22   10.59
   0  22  13  144.56   37.54
   0  22  13  169.19   43.96
   0  22 -13  133.52   34.59
   0 -22 -13  225.92   45.64
   0 -22  13  181.85   35.49
   0  22  14   91.72   24.51
   0  22  14  105.08   18.67
   0  22 -14  111.19   31.49
   0 -22 -14   94.03   30.49
   0 -22  14  103.66   23.05
   0  22  15  103.70   21.23
   0  22  15   92.38   12.68
   0  22 -15   81.03   25.22
   0 -22 -15   65.47   31.25
   0 -22  15   72.37   24.61
   0  22  16    8.96    6.61
   0  22  16   38.60   18.15
   0  22 -16   33.55   12.92
   0 -22 -16   -1.86   10.35
   0 -22  16   16.75    7.41
   0  22  17  821.37   84.95
   0  22  17  748.57  113.95
   0  22 -17  783.50  107.07
   0 -22 -17  806.50  119.91
   0 -22  17  500.19  123.78
   0  22  18  130.09   37.10
   0  22  18  188.90   31.17
   0  22 -18  186.22   34.52
   0 -22 -18  110.32   19.55
   0 -22  18   71.48   27.32
   0  22  19    9.11    8.66
   0  22  19   39.62   15.91
   0  22 -19   25.91   12.93
   0 -22 -19   -6.52   15.59
   0  23   0    2.61    3.49
   0  23   0   24.10   15.69
   0 -23   0   16.98   11.49
   0  23   1    4.90    3.03
   0  23  -1    7.38    4.31
   0  23  -1   20.68    8.84
   0  23   1   26.95    8.34
   0 -23   1   20.65    7.91
   0 -23  -1   11.42   11.73
   0  23   2   43.44   10.18
   0  23  -2   43.62   12.02
   0  23   2   67.91   19.03
   0  23  -2   72.00   19.05
   0 -23   2   64.34   15.25
   0 -23  -2   95.74   20.72
   0  23   3  441.00   22.01
   0  23  -3  405.17   21.38
   0  23   3  466.01   74.62
   0  23  -3  483.14  102.36
   0 -23  -3  425.48   83.84
   0 -23   3  561.94   56.47
   0  23   4   64.14   20.48
   0  23  -4   51.27   14.67
   0  23   4  114.08   31.00
   0  23  -4  108.56   17.23
   0 -23  -4  106.76   25.77
   0 -23   4  102.78   22.35
   0  23   5   88.84   26.91
   0  23  -5   64.92   18.36
   0  23   5   92.10   26.75
   0  23  -5  139.31   26.84
   0 -23  -5  138.61   26.40
   0 -23   5   92.11   30.32
   0  23   6   29.38    5.33
   0  23  -6   11.81    6.00
   0  23   6   31.99   18.30
   0  23  -6   17.33    8.66
   0 -23  -6   48.17   21.32
   0 -23   6   24.86   11.34
   0  23   7  176.73   37.67
   0  23   7  208.57   36.74
   0  23  -7  202.71   48.09
   0 -23  -7  203.17   47.89
   0 -23   7  236.82   54.04
   0  23   8   83.10   19.47
   0  23   8  133.32   30.41
   0  23  -8   78.09   14.76
   0 -23  -8  109.70   19.60
   0 -23   8   72.77   15.26
   0  23   9   -0.37    4.42
   0  23   9   16.05   12.43
   0  23  -9   39.74   14.02
   0 -23  -9   33.37   15.06
   0 -23   9  -13.65   13.82
   0  23  10   70.63   19.96
   0  23  10  100.89   29.42
   0  23 -10   79.64   25.67
   0 -23 -10  114.36   26.33
   0 -23  10  112.13   31.61
   0  23  11   46.26   22.09
   0  23 -11   11.45    7.71
   0 -23 -11   39.46   14.17
   0 -23  11   14.78    7.25
   0  23  12   28.91   13.90
   0  23 -12   24.85   15.15
   0 -23 -12   28.55   18.70
   0 -23  12   67.90   20.26
   0  23  13   24.09   18.97
   0  23 -13   52.15   16.53
   0 -23 -13   16.83   15.24
   0 -23  13   16.05   14.66
   0  23  14    7.87   11.44
   0  23  14  -12.53   14.36
   0  23 -14   16.23   13.28
   0 -23 -14   34.36   11.69
   0 -23  14   27.77   12.48
   0  23  15   15.12    8.94
   0  23  15   21.74   10.62
   0  23 -15   25.80   17.60
   0 -23 -15   18.42    9.36
   0 -23  15    6.19    7.48
   0  23  16  265.89   81.63
   0  23  16  511.98   75.39
   0  23 -16  417.52  109.49
   0 -23 -16  461.35   72.12
   0 -23  16  310.67   86.81
   0  23  17   16.93    8.70
   0  23  17   27.53    9.74
   0  23 -17   57.19   20.84
   0 -23 -17   47.73   19.09
   0 -23  17   34.46    8.65
   0  24   0  211.76   37.06
   0 -24   0  174.23   44.31
   0  24   1   17.44    6.68
   0  24  -1   20.64   12.15
   0 -24   1  -10.01   16.33
   0 -24  -1    7.22    8.79
   0  24   2  358.37   74.22
   0  24  -2  480.00   82.63
   0 -24   2  337.25   76.79
   0 -24  -2  330.80   73.32
   0  24   3   31.84    9.37
   0  24  -3   11.92    9.84
   0 -24  -3   19.72   11.38
   0 -24   3    7.83   11.04
   0  24   4  115.03   39.48
   0  24  -4  153.21   44.79
   0 -24  -4  171.43   46.62
   0 -24   4  171.20   34.63
   0  24   5   19.14   11.61
   0  24  -5   28.20   12.97
   0 -24  -5   16.33   13.44
   0 -24   5   39.96   16.68
   0  24   6   75.57   18.89
   0  24  -6   35.97   20.66
   0 -24  -6   51.21   15.29
   0 -24   6   50.48   18.40
   0  24   7  156.54   54.98
   0  24  -7  194.10   41.27
   0 -24  -7  166.25   34.87
   0 -24   7  165.64   47.62
   0  24   8   22.73   12.61
   0  24  -8   26.13   12.57
   0 -24  -8  -17.85   17.03
   0 -24   8   15.21   10.83
   0  24   9    8.22    7.99
   0  24   9   11.85    9.37
   0  24  -9   67.16   20.68
   0 -24  -9   10.16   10.65
   0 -24   9   18.76   11.42
   0  24  10   33.38   11.63
   0  24 -10   33.74    8.18
   0 -24 -10   39.52   15.33
   0 -24  10   14.83   10.28
   0  24  11   49.09   28.38
   0  24 -11   24.58   17.15
   0 -24 -11   87.92   21.46
   0 -24  11   55.77   17.96
   0  24  12  261.48   61.55
   0  24 -12  196.16   56.79
   0 -24 -12  236.62   68.20
   0 -24  12  263.80   69.91
   0  24  13  101.58   22.48
   0  24 -13   84.74   24.39
   0 -24 -13   58.30   19.46
   0 -24  13   91.12   35.29
   0  24  14  831.36  119.81
   0  24 -14  517.00  143.40
   0 -24 -14  813.37  356.71
   0 -24  14  665.09  111.93
   0  24  15  700.38  110.58
   0  24 -15  367.68  117.41
   0 -24 -15  667.02  107.51
   0 -24  15  610.40   75.34
   0  24  16    3.34    6.53
   0  24 -16   16.99   12.77
   0 -24 -16   37.53   14.79
   0 -24  16    7.94    7.35
   0  25   0   19.19   13.37
   0 -25   0    8.41   10.93
   0  25   1   13.75   11.46
   0  25  -1   24.11   10.19
   0 -25   1   23.79   13.35
   0 -25  -1   36.42   14.27
   0  25   2  218.92   53.18
   0  25  -2  221.46   65.43
   0 -25  -2  310.21   64.33
   0 -25   2  239.00   54.29
   0  25   3  -15.41   14.31
   0  25  -3   53.60   25.44
   0 -25  -3   38.42   16.27
   0 -25   3   17.70   12.40
   0  25   4  327.42   65.31
   0  25  -4  393.37   84.58
   0 -25  -4  355.59   59.50
   0 -25   4  296.11   78.68
   0  25   5  198.56   58.94
   0  25  -5  232.28  103.63
   0 -25  -5  240.22   44.46
   0 -25   5  291.34   54.44
   0  25   6  387.30   42.84
   0  25  -6  394.71   83.01
   0 -25  -6  322.42   82.57
   0 -25   6  269.45   89.20
   0  25   7   71.98   18.87
   0  25  -7   89.13   27.59
   0 -25  -7  115.56   25.01
   0 -25   7   25.38   21.31
   0  25   8  415.00   51.19
   0  25  -8  188.08   62.99
   0 -25  -8  262.40   57.35
   0 -25   8  240.30   76.70
   0  25   9   33.88   10.34
   0  25  -9   36.42   12.12
   0 -25  -9   28.64   13.56
   0 -25   9   12.18   12.66
   0  25  10   95.61   27.14
   0  25 -10   85.04   30.14
   0 -25 -10  137.88   28.69
   0 -25  10  102.43   26.41
   0  25  11   12.61   13.43
   0  25 -11   51.78   19.29
   0 -25 -11   19.62   16.75
   0 -25  11   15.03   10.21
   0  25  12  595.94   98.06
   0  25 -12  751.35   84.59
   0 -25 -12  451.48  127.38
   0 -25  12  454.23   52.97
   0  25  13  189.78   36.18
   0  25 -13  168.57   31.25
   0 -25 -13  121.03   45.71
   0 -25  13  137.38   38.97
   0  25  14  281.94   43.58
   0  25 -14  194.55   62.98
   0 -25 -14  255.67   51.07
   0 -25  14  166.36   66.63
   0  26   0   46.22   18.74
   0 -26   0   39.89   20.93
   0  26   1   86.78   32.52
   0  26  -1   88.15   26.29
   0 -26  -1   73.87   24.60
   0 -26   1  103.75   19.80
   0  26   2  183.31   52.26
   0  26  -2  224.20   55.17
   0 -26  -2  212.93   60.44
   0 -26   2  210.88   55.20
   0  26   3  202.36   89.45
   0  26  -3  310.19   54.55
   0 -26  -3  324.14   51.31
   0 -26   3  213.30   61.22
   0  26   4 1195.09   86.60
   0  26  -4 1136.27   96.74
   0 -26   4 1077.04  103.62
   0 -26  -4  921.36  127.08
   0  26   5   14.89   13.99
   0  26  -5   19.06   13.65
   0 -26   5    4.39    9.30
   0 -26  -5   -3.36   10.41
   0  26   6   53.50   19.18
   0  26  -6   77.09   17.57
   0 -26  -6   57.35   17.57
   0 -26   6   59.52   17.79
   0  26   7   20.88   11.88
   0  26  -7    7.97    8.22
   0 -26  -7   -6.30   13.33
   0 -26   7    8.82   12.36
   0  26   8   40.41   12.08
   0 -26  -8   37.54   16.38
   0 -26   8   24.80   14.11
   0  26   9  125.67   46.98
   0  26  -9  188.48   96.92
   0 -26  -9  111.32   37.56
   0 -26   9  133.33   48.76
   0  26  10  117.13   32.22
   0  26 -10   59.11   18.55
   0 -26 -10   80.33   19.81
   0 -26  10   55.45   31.19
   0  26  11    7.39   17.85
   0  26 -11   11.77   13.72
   0 -26 -11   41.79   16.98
   0 -26  11   -8.81   16.21
   0  26  12  358.49   48.36
   0  26 -12  213.11   82.16
   0 -26 -12  226.91   86.04
   0  27   0   23.02    9.06
   0 -27   0   28.77   15.93
   0  27   1  143.04   34.57
   0  27  -1  230.76   41.42
   0 -27  -1  189.07   46.96
   0 -27   1  123.91   51.60
   0  27   2  168.47   47.00
   0  27  -2  225.96   60.30
   0 -27   2  199.28   55.03
   0 -27  -2  251.02   61.89
   0  27  -3  210.25   88.92
   0  27   3  229.25   78.21
   0 -27   3  263.39   99.54
   0 -27  -3  290.77   41.93
   0  27   4  -11.43   15.12
   0  27  -4   -3.37   16.94
   0 -27  -4   56.95   17.24
   0 -27   4   14.72   15.26
   0  27   5   80.72   17.07
   0  27  -5   33.15   13.40
   0 -27  -5   25.39   20.14
   0 -27   5   27.71   17.88
   0  27   6 1357.06   81.41
   0  27  -6 1121.09  145.74
   0 -27  -6 1120.36  130.73
   0 -27   6 1183.06  112.19
   0  27   7  174.30   62.64
   0  27  -7  177.21   61.81
   0 -27   7  194.43   46.85
   0 -27  -7  182.02   60.00
   0  27   8   13.99    8.35
   0  27  -8    5.05   13.39
   0 -27  -8    8.14   11.72
   0 -27   8   32.83   16.27
   0  27   9   49.94   11.04
   0  27  -9   30.40   12.51
   0 -27  -9   43.73   13.95
   0 -27   9   40.38   13.96
   0  28   0  478.82   72.03
   0 -28   0  386.70  123.70
   0  28  -1   65.08   19.40
   0  28   1   68.93   21.06
   0 -28   1   44.84   22.94
   0 -28  -1   72.57   26.66
   0  28  -2   85.09   21.68
   0  28   2   76.59   20.21
   0 -28  -2   68.22   18.76
   0 -28   2   39.64   18.99
   0  28   3  171.06   52.44
   0  28  -3  139.23   41.81
   0 -28  -3  136.39   22.54
   0 -28   3  152.01   49.87
   0  28   4 1447.05  130.88
   0  28  -4 1450.36  114.11
   0 -28  -4 1390.52   94.23
   0 -28   4 1418.97  105.80
   0  28   5  101.63   44.41
   0  28  -5   53.67   26.01
   0 -28  -5   53.68   32.66
   0 -28   5  108.52   33.22
   0  28   6    9.15   12.16
   0  28  -6   19.31    9.62
   0 -28   6    5.90   10.49
   0 -28  -6   17.66   14.85
  -1   0  29 3620.22  209.25
   1   0 -29 3561.78  211.80
  -1   0  28   12.94    7.16
   1   0 -28   22.72   15.68
  -1   0  27  124.65   22.94
  -1   0  26    7.48   11.94
   1   0 -26   32.85   17.02
   1   0 -26    1.29    6.61
  -1   0  25   69.93   12.17
   1   0 -25   80.18   20.26
   1   0 -25   83.17   16.61
  -1   0  24   31.12   11.25
   1   0 -24   19.75   15.38
   1   0 -24    6.74    8.91
  -1   0  23  927.10   46.98
   1   0 -23  994.62  142.97
   1   0 -23  797.06   68.03
   1   0 -22    3.41   31.84
  -1   0  2117332.80 6663.81
   1   0 -2125397.56 9764.92
   1   0 -2126067.3210021.51
  -1   0  2124387.08 9375.60
  -1   0  20   -8.88   15.77
   1   0 -20   -0.55   20.10
   1   0 -20   -1.89    9.24
  -1   0  20   -5.86    9.06
  -1   0  19  937.35   57.09
   1   0 -19  999.00  130.92
   1   0 -19 1051.21   84.16
  -1   0  18   -0.73   12.24
   1   0 -18   10.74   14.60
   1   0 -18    0.44    6.79
  -1   0  17 1261.82   83.15
   1   0 -17 1200.55   75.56
   1   0 -17 1181.57  175.82
  -1   0  17 1172.21  174.08
  -1   0  16    0.60    6.50
   1   0 -16   12.26    6.83
   1   0 -16   17.02   13.20
  -1   0  16   -1.40    3.50
  -1   0  15 1880.45   66.72
   1   0 -15 1626.38   65.15
   1   0 -15 1870.56   65.60
  -1   0  15 1854.03   64.02
  -1   0  14  -15.39   10.37
   1   0 -14   10.85    3.31
   1   0 -14    4.92   19.66
  -1   0  14   11.46    8.04
   1   0 -14   16.24    6.93
  -1   0  14    8.73    3.50
  -1   0  1311916.00  151.79
   1   0 -1311487.10  147.30
   1   0 -1311555.74  157.55
   1   0 -1312076.99  150.54
  -1   0  1312357.98  157.18
  -1   0  12  -21.51    8.92
   1   0 -12   -2.26   10.53
   1   0 -12    5.08    6.62
  -1   0  12   -0.09   12.96
   1   0 -12    0.68    3.97
  -1   0  12   -8.60    5.68
   1   0 -1113940.90  159.36
   1   0 -1113515.79  434.94
  -1   0  1113506.31  272.90
   1   0 -1114320.93  164.82
  -1   0  1113901.30  157.85
  -1   0  10   -7.94   11.65
   1   0 -10    2.71    4.87
   1   0 -10   24.89   10.61
  -1   0  10    7.58    7.95
   1   0 -10   -5.44    8.39
  -1   0  10  -23.37    5.97
  -1   0   8  -13.30    8.08
   1   0  -8    6.85    6.57
  -1   0   8   -3.03   12.21
   1   0  -8    1.48   14.65
   1   0  -8    6.83    3.43
  -1   0   8   -4.99    4.95
   1   0  -7  105.53   17.04
  -1   0   7   98.31   16.34
   1   0  -7  138.54   23.23
  -1   0   7  112.23   19.58
   1   0  -7   88.49   10.55
  -1   0   7  120.55   15.16
   1   0  -6    9.23    6.00
  -1   0   6    1.57    6.31
  -1   0   6    8.89    5.30
   1   0  -6   20.13    9.32
   1   0  -6    6.36    4.03
  -1   0   6    4.87    3.82
   1   0  -5  222.06   20.92
  -1   0   5  215.19   22.40
  -1   0   5  186.24   12.31
   1   0  -5  197.96   14.38
   1   0  -5  210.79   10.84
  -1   0   5  206.79   10.57
  -1   0   4   -1.26    4.20
   1   0  -4    4.49    3.70
  -1   0   4   20.27   12.04
   1   0  -4   42.47   13.13
   1   0  -4    3.24    2.64
  -1   0   4   24.38    8.38
  -1   0   3  566.22   21.93
   1   0  -3  551.17   20.66
  -1   0   3  574.85   24.39
   1   0  -3  547.74   21.46
   1   0  -3  499.85   17.22
  -1   0   3  538.34   18.81
  -1   0  -316632.85  144.35
   1   0   317318.32  149.95
   1   0   316982.40  147.58
  -1   0  -317030.12  150.19
  -1   0  -317173.09  149.73
   1   0   317674.22  154.07
  -1   0  -4   11.18    6.42
   1   0   4   10.39    5.38
   1   0   4   -0.44    7.87
  -1   0  -4   23.84    9.64
  -1   0  -4    7.69    5.94
   1   0   4   13.50    9.39
   1   0   521024.34  183.04
  -1   0  -521878.20  190.74
  -1   0  -521675.61  191.30
   1   0   521644.55  192.15
  -1   0  -522082.86  192.59
   1   0   521631.89  190.10
   1   0   6    7.54    6.67
  -1   0  -6   15.16    9.76
  -1   0  -6   -2.98    5.55
   1   0   6   -2.82    9.55
  -1   0  -6  -13.71    7.35
   1   0   6    6.28    6.00
   1   0   7 2395.52   66.37
  -1   0  -7 2378.46   63.87
  -1   0  -7 2417.55   67.48
   1   0   7 2369.37   64.43
  -1   0  -7 2439.85   65.05
   1   0   7 2390.52   63.55
   1   0   8    8.59    7.68
  -1   0  -8   -2.48    7.83
   1   0   8   -0.99   11.11
  -1   0  -8    9.19    6.89
  -1   0  -8  -16.24    8.01
   1   0   8   13.38    7.49
   1   0   919735.81  220.15
  -1   0  -919743.84  219.19
  -1   0  -918537.00  209.77
   1   0   918494.40  216.35
  -1   0  -919634.51  217.97
   1   0   919262.14  212.34
   1   0  10    5.15    7.17
  -1   0 -10   -0.24    8.76
  -1   0 -10   15.43    9.46
   1   0  10    0.65   13.04
  -1   0 -10   -2.74    7.55
   1   0  10   34.34    6.82
   1   0  11 4603.58  102.73
  -1   0 -11 4501.20  100.58
  -1   0 -11 4496.88  103.38
   1   0  11 4337.81   99.91
  -1   0 -11 4482.69   98.83
   1   0  11 4557.45  100.22
   1   0  12    7.42    4.99
  -1   0 -12    6.48    7.04
  -1   0 -12    7.29    9.57
   1   0  12   -7.03   10.61
  -1   0 -12    1.40    7.44
   1   0  12    6.45    5.68
   1   0  13  109.77   24.98
  -1   0 -13   99.98   12.45
  -1   0 -13  114.25   22.82
   1   0  13   56.23   16.64
  -1   0 -13  152.71   18.12
   1   0  13  114.07   14.26
   1   0  14  -13.83   11.02
  -1   0 -14  -13.73   13.11
   1   0  14    5.74    6.41
  -1   0 -14    6.95    5.71
   1   0  14   17.69    7.74
   1   0  15 6470.27  152.17
  -1   0 -15 6509.29  146.99
  -1   0 -15 6684.66  144.76
   1   0  15 6488.65  143.90
  -1   0 -16   22.19    8.50
  -1   0 -16    9.50    4.84
   1   0  16    5.14    7.12
   1   0  17 2445.87  106.97
  -1   0 -17 2384.83   96.31
  -1   0 -17 2391.39   92.60
   1   0  17 2422.23  103.43
   1   0  18   -0.95   11.16
  -1   0 -18   22.41   12.19
  -1   0 -18    8.60    5.34
   1   0  18    9.39    6.04
   1   0  19 1110.86   69.29
  -1   0 -19 1105.04  131.41
  -1   0 -19 1058.63   82.68
   1   0  19  970.06   56.57
   1   0  20   30.07   12.99
  -1   0 -20   15.03   21.85
  -1   0 -20    3.21    7.41
   1   0  21 1670.30   81.74
  -1   0 -21 1587.70   89.04
  -1   0 -21 1680.96  120.25
   1   0  22   10.46    8.88
  -1   0 -22   42.60   17.14
  -1   0 -22   14.12   11.63
   1   0  23 2858.74  101.50
  -1   0 -23 2811.16  108.52
  -1   0 -23 2979.30  103.92
   1   0  24   20.24   10.21
  -1   0 -24    7.32   15.25
  -1   0 -24    8.92    7.75
   1   0  25 2772.99  122.58
  -1   0 -25 2711.02  126.94
  -1   0 -25 2607.54  126.15
   1   0  26   23.07    9.24
  -1   0 -26    9.56   16.32
  -1   0 -26   -2.18   14.17
   1   0  27  720.04   88.23
  -1   0 -27  713.79   94.73
  -1   0 -27  846.48   47.58
   1   0  28   24.04   13.24
  -1   0 -28   21.76   17.23
  -1   0 -28    8.02   10.62
   1   0  29  472.04   94.13
  -1   0 -29  307.52  113.58
  -1   1  29   82.26   21.68
   1   1 -29  132.32   17.64
  -1  -1  29  131.08   34.44
   1  -1 -29  145.90   39.82
  -1   1  28   94.11   18.99
   1   1 -28   49.96   15.60
  -1  -1  28   71.78   17.96
   1  -1 -28   99.19   27.11
  -1   1  27  800.87   71.45
   1   1 -27  626.86  110.84
  -1  -1  27  792.97   48.81
   1  -1 -27  584.40  113.60
  -1   1  26   27.39   10.41
   1   1 -26   12.07   14.11
  -1  -1  26   10.91   11.28
   1  -1 -26   11.09   14.44
  -1   1  25  115.90   23.29
   1   1 -25  146.58   31.74
  -1  -1  25  117.38   18.51
   1  -1 -25  127.78   29.36
   1  -1 -25   99.72   19.00
   1   1 -24  101.03   58.87
  -1  -1  24   21.14   20.90
   1  -1 -24   40.85   19.53
  -1   1  23 6925.71  228.49
   1   1 -23 7391.59  248.01
   1   1 -23 7126.89  232.94
  -1  -1  23 6720.80  218.96
   1  -1 -23 7110.16  238.09
   1  -1 -23 7092.20  235.79
   1   1 -22  384.39   51.99
  -1   1  22  398.48   58.17
  -1   1  22  236.04   54.19
   1   1 -22  426.22   34.40
  -1  -1  22  403.87   61.39
   1  -1 -22  475.24   61.23
   1  -1 -22  378.06   46.94
   1   1 -21  910.34  138.67
  -1   1  21  643.59   92.06
  -1   1  21  765.73   59.68
   1   1 -21  875.23   49.28
  -1  -1  21  809.73  106.17
   1  -1 -21  853.92   86.22
   1  -1 -21  862.69   51.52
  -1  -1  21  749.55   52.47
   1   1 -20 3616.98  145.50
   1   1 -20 3624.12  136.56
  -1   1  20 3328.28  125.97
   1  -1 -20 3398.24  149.10
   1  -1 -20 3516.12  141.80
  -1  -1  20 3594.30  135.25
   1   1 -19 7486.48  212.34
  -1   1  19 8143.54  232.44
   1   1 -19 8451.98  250.68
   1  -1 -19 7848.12  227.08
  -1  -1  19 8178.63  233.27
   1  -1 -19 8572.01  244.08
  -1  -1  19 8378.67  233.24
  -1   1  18  100.02   22.85
   1   1 -18   53.93   14.08
   1   1 -18   56.43   14.45
  -1   1  18   50.62   13.34
  -1  -1  18   81.35   19.76
   1  -1 -18   66.14   19.57
   1  -1 -18   89.32   19.03
  -1  -1  18   47.92   11.48
  -1   1  17   22.67   14.14
   1   1 -17    0.70   11.27
  -1   1  17   14.68    4.85
   1   1 -17   20.43    8.04
  -1  -1  17   25.20   11.18
   1  -1 -17   26.74    9.34
   1  -1 -17   -8.09   16.59
  -1  -1  17   10.55    5.20
   1   1 -16 1338.93   55.71
  -1   1  16 1349.58   59.60
   1   1 -16 1022.20   52.00
  -1   1  16 1224.64   51.49
  -1  -1  16 1371.42   64.61
   1  -1 -16 1349.92   62.17
  -1  -1  16 1373.72   56.47
   1  -1 -16 1046.48   57.24
   1   1 -15 1868.44   68.95
  -1   1  15 2121.29   73.82
   1   1 -15 1930.58   71.90
  -1   1  15 2164.80   73.67
  -1  -1  15 2092.23   72.58
   1  -1 -15 2240.98   78.72
  -1  -1  15 2182.82   73.33
   1  -1 -15 1891.06   75.80
  -1   1  14   16.92    7.29
  -1   1  14   20.54    9.49
   1   1 -14   23.21    7.70
  -1   1  14   20.76    7.04
   1   1 -14   36.87   11.95
   1   1 -14   12.79    5.75
  -1  -1  14  -13.92    9.46
   1  -1 -14   -5.34   14.38
  -1  -1  14   25.97   12.62
   1  -1 -14   33.47    7.99
  -1  -1  14   16.91    5.15
   1  -1 -14   12.77    6.37
  -1   1  13   11.23    4.98
  -1   1  13   -6.36    5.29
   1   1 -13    9.74    7.33
   1   1 -13   33.19   12.96
  -1   1  13    7.60    9.18
   1   1 -13    0.44    3.68
  -1  -1  13    7.04    6.52
  -1  -1  13    8.73    7.97
   1  -1 -13   -7.28    8.69
   1  -1 -13   -3.25    8.15
  -1  -1  13    7.51    5.03
   1  -1 -13  -10.69   13.50
  -1   1  12 5478.45  110.69
  -1   1  12 5519.03  118.74
   1   1 -12 5976.90  122.14
   1   1 -12 5729.01  121.62
  -1   1  12 5527.35  116.60
  -1  -1  12 5625.67  120.83
   1  -1 -12 5969.31  127.12
   1  -1 -12 6025.34  122.86
  -1  -1  12 5925.82  118.46
  -1  -1  12 5642.16  114.78
  -1   1  1149985.47  544.05
  -1   1  1154383.65  579.07
   1   1 -1152984.00  569.37
   1   1 -1153287.02  579.95
   1   1 -1153450.47  566.24
   1  -1 -1154264.02  589.69
  -1  -1  1152065.80  573.31
   1  -1 -1153834.62  572.37
  -1  -1  1154154.38  578.20
  -1  -1  1151787.79  551.78
   1  -1 -1153794.42  578.34
  -1   1  10   37.71   13.09
  -1   1  10   38.41   14.71
  -1   1  10    9.40    6.77
   1   1 -10   39.10    7.25
   1   1 -10  -33.29   17.78
   1   1 -10   31.93    5.50
   1  -1 -10   38.16    9.87
  -1  -1  10   57.64   14.25
   1  -1 -10   43.37    8.20
  -1  -1  10   21.72   12.17
  -1  -1  10   16.65    3.38
   1  -1 -10   48.52    8.00
  -1   1   9 6002.37  127.72
  -1   1   9 6446.41  129.43
   1   1  -9 6535.81  133.09
   1   1  -9 6067.51  129.12
  -1   1   9 5925.72  124.26
   1   1  -9 6265.11  127.38
  -1  -1   9 6334.54  129.58
   1  -1  -9 6533.19  139.23
   1  -1  -9 6312.59  132.67
  -1  -1   9 6343.52  126.24
   1  -1  -9 6450.31  130.59
  -1  -1   9 6193.69  130.27
  -1   1   8 1206.05   50.93
  -1   1   8 1240.77   46.85
   1   1  -8 1289.23   51.56
  -1   1   8 1404.86   39.39
   1   1  -8 1111.91   46.01
   1   1  -8 1212.39   42.12
  -1  -1   8 1127.78   43.17
   1  -1  -8 1192.62   55.22
  -1  -1   8 1317.23   49.38
  -1  -1   8 1299.26   44.83
   1  -1  -8 1333.56   46.96
   1  -1  -8 1400.57   40.74
   1   1  -7 4381.58   92.51
   1   1  -7 4226.50   87.15
  -1   1   7 4418.23   90.50
  -1   1   7 4259.97   90.42
   1   1  -7 4463.80   89.54
  -1   1   7 4560.40   92.13
   1  -1  -7 4493.67   95.38
  -1  -1   7 4489.69   94.73
  -1  -1   7 4511.88   93.36
  -1  -1   7 4462.23   88.68
   1  -1  -7 4443.50   89.64
   1  -1  -7 4608.88   95.46
   1   1  -6  697.04   29.11
   1   1  -6  730.09   27.93
  -1   1   6  776.12   29.74
  -1   1   6  728.49   35.94
   1   1  -6  732.77   28.25
  -1   1   6  725.24   26.27
  -1  -1   6  724.50   29.03
   1  -1  -6  699.03   29.52
  -1  -1   6  749.05   29.04
   1  -1  -6  732.89   29.86
  -1  -1   6  676.04   23.78
   1  -1  -6  761.18   29.42
   1   1  -5 3312.31   87.57
  -1   1   5 3389.84   87.46
   1   1  -5 3296.42   84.74
   1   1  -5 3469.93   68.80
  -1   1   5 3186.89   83.95
  -1   1   5 3373.50   85.95
   1  -1  -5 3331.82   86.02
  -1  -1   5 3306.20   86.97
   1  -1  -5 3427.98   73.01
  -1  -1   5 3345.20   84.48
  -1  -1   5 3447.68   72.90
   1  -1  -5 3423.26   70.44
   1   1  -4 1447.63   36.72
  -1   1   4 1377.89   37.10
  -1   1   4 1667.75   45.20
   1   1  -4 1416.41   38.11
   1   1  -4 1449.99   41.20
  -1   1   4 1496.16   43.11
  -1  -1   4 1469.03   39.93
   1  -1  -4 1513.12   45.64
  -1  -1   4 1346.94   47.51
  -1  -1   4 1422.70   36.03
   1  -1  -4 1426.40   39.04
   1  -1  -4 1396.15   37.55
   1   1  -312983.43  113.73
   1   1  -313147.20  118.03
  -1   1   312988.88  112.96
  -1   1   313200.05  114.17
   1  -1  -313159.64  114.31
   1  -1  -312652.32  113.24
  -1  -1   312885.79  116.45
   1  -1  -313422.69  115.93
   1   1   3  306.53   22.25
  -1   1  -3  281.91   14.43
   1   1   3  276.09   14.70
  -1   1  -3  303.63   16.49
  -1   1  -3  314.65   20.08
   1  -1   3  288.58   15.25
   1  -1   3  291.39   15.73
  -1  -1  -3  354.50   25.71
  -1  -1  -3  282.94   14.70
   1  -1   3  283.30   15.03
  -1  -1  -3  286.01   15.99
  -1  -1  -3  296.10   19.40
   1   1   4 9192.99  145.67
  -1   1  -4 8822.33  138.90
   1   1   4 9104.91  144.04
  -1   1  -4 8621.00  138.33
  -1   1  -4 8859.05  140.57
   1  -1   4 8380.38  132.13
   1  -1   4 8359.07  132.94
  -1  -1  -4 8500.34  135.10
   1  -1   4 8756.78  138.76
  -1  -1  -4 9094.05  143.98
  -1  -1  -4 8389.53  133.72
  -1   1  -5  320.67   18.23
   1   1   5  373.77   27.14
  -1   1  -5  339.78   25.33
   1   1   5  313.24   17.56
  -1   1  -5  343.67   18.40
   1   1   5  317.45   16.77
   1  -1   5  315.79   18.50
  -1  -1  -5  307.69   17.69
   1  -1   5  345.61   30.61
  -1  -1  -5  323.56   18.22
   1  -1   5  295.16   15.25
  -1  -1  -5  324.39   23.53
   1   1   6  240.14   21.10
   1   1   6  258.94   22.94
  -1   1  -6  231.67   14.20
   1   1   6  233.07   15.95
  -1   1  -6  254.72   25.95
  -1   1  -6  237.70   15.13
   1  -1   6  220.82   13.90
  -1  -1  -6  259.67   20.74
   1  -1   6  248.21   25.55
  -1  -1  -6  253.25   17.42
   1  -1   6  224.59   13.21
  -1  -1  -6  236.41   20.21
  -1   1  -7  475.72   19.58
   1   1   7  459.17   19.61
   1   1   7  606.41   26.39
  -1   1  -7  526.75   25.41
   1   1   7  478.01   28.70
  -1   1  -7  472.32   19.68
  -1  -1  -7  483.79   21.08
   1  -1   7  511.04   26.54
  -1  -1  -7  518.91   26.28
  -1  -1  -7  528.57   27.98
   1  -1   7  517.60   20.98
   1  -1   7  512.69   22.94
  -1   1  -8 3051.20   82.32
  -1   1  -8 3127.70   82.56
   1   1   8 3076.80   82.98
   1   1   8 3059.37   83.66
  -1   1  -8 3121.48   81.82
   1   1   8 3199.18   92.20
   1  -1   8 3242.60   92.60
  -1  -1  -8 3271.61   96.52
   1  -1   8 3272.62   86.37
   1  -1   8 3074.19   80.92
  -1  -1  -8 3278.88   87.10
  -1  -1  -8 3188.39   84.40
  -1   1  -9 9401.03  187.84
   1   1   9 9486.33  192.30
   1   1   9 9905.76  199.03
   1   1   910003.13  199.89
  -1   1  -9 9694.07  196.46
  -1   1  -9 9761.11  195.56
   1  -1   9 9984.77  199.53
  -1  -1  -9 9905.73  198.14
   1  -1   9 9847.77  199.58
  -1  -1  -910215.88  204.00
   1  -1   9 9758.82  194.17
  -1  -1  -9 9841.19  200.64
  -1   1 -10 4368.04   96.12
   1   1  10 4536.61  100.90
   1   1  10 4445.05   97.81
   1   1  10 4207.68   96.34
  -1   1 -10 4305.87  110.46
   1  -1  10 4475.30  102.39
   1  -1  10 4626.64  106.59
  -1  -1 -10 4558.98  100.90
   1  -1  10 4483.11  103.39
  -1  -1 -10 4524.61   99.85
  -1  -1 -10 4573.69  104.53
   1   1  11 6936.66  142.32
  -1   1 -11 6521.69  209.84
   1   1  11 6700.17  140.45
   1   1  11 6425.12  209.34
  -1   1 -11 6585.52  215.44
  -1   1 -11 6494.47  209.04
   1  -1  11 6689.89  140.63
  -1  -1 -11 6820.66  140.98
  -1  -1 -11 6680.38  141.16
   1  -1  11 6759.28  137.94
  -1  -1 -11 6755.83  139.47
   1  -1  11 7017.06  143.42
  -1   1 -12 1728.43   58.60
  -1   1 -12 1933.78   84.28
   1   1  12 1848.71   59.97
   1   1  12 1771.55   73.59
  -1   1 -12 1765.29   54.81
   1   1  12 1805.48   56.50
   1  -1  12 1802.61   66.80
  -1  -1 -12 1840.07   59.47
   1  -1  12 1847.63   63.14
  -1  -1 -12 1785.17   59.59
  -1  -1 -12 1868.63   80.91
   1  -1  12 1818.45   57.65
  -1   1 -13 2648.89   90.75
   1   1  13 2720.04   90.14
  -1   1 -13 2512.69   83.00
   1   1  13 2700.38   92.75
  -1   1 -13 2689.58   89.08
   1   1  13 2687.19   89.97
  -1  -1 -13 2821.35   97.59
   1  -1  13 2658.78   90.22
   1  -1  13 2848.55   97.98
  -1  -1 -13 2771.87   91.15
   1  -1  13 2834.05   92.40
  -1  -1 -13 2839.37   94.80
  -1   1 -14 1334.87   46.79
   1   1  14 1381.32   53.39
   1   1  14 1372.03   67.26
  -1   1 -14 1307.00   46.03
  -1   1 -14 1254.83   48.18
   1   1  14 1263.21   73.14
   1  -1  14 1291.92   45.96
   1  -1  14 1266.29   49.92
  -1  -1 -14 1310.85   68.38
  -1  -1 -14 1375.90   56.21
   1  -1  14 1307.95   46.49
  -1  -1 -14 1396.04   52.12
  -1  -1 -15 9084.48  210.04
   1   1  16   43.59    9.60
   1   1  16   56.76   10.77
  -1   1 -16   51.93   12.02
  -1   1 -16   41.39   11.67
   1  -1  16   62.06   10.17
  -1  -1 -16   53.73   20.37
   1   1  17  526.42   53.51
  -1   1 -17  620.71   83.41
   1   1  17  463.70   70.10
  -1   1 -17  520.26   44.53
   1  -1  17  616.33   55.46
  -1  -1 -17  520.82   49.15
  -1  -1 -17  548.17   68.95
   1  -1  17  441.03   53.16
   1   1  18  304.08   45.45
   1   1  18  229.04   34.44
  -1   1 -18  294.97   43.30
  -1   1 -18  261.28   38.11
   1  -1  18  306.44   44.76
  -1  -1 -18  279.16   37.61
   1  -1  18  181.22   34.14
  -1  -1 -18  295.01   46.39
   1   1  19 1293.23   74.18
  -1   1 -19 1396.61  126.22
   1   1  19 1164.41   68.21
  -1   1 -19 1311.25   72.47
   1  -1  19 1476.20   97.79
  -1  -1 -19 1325.91   81.21
  -1  -1 -19 1473.36  139.06
   1  -1  19 1285.54   70.03
   1   1  20  566.37   52.43
  -1   1 -20  529.98   55.65
  -1   1 -20  545.72   65.09
  -1  -1 -20  528.59   71.32
  -1  -1 -20  535.60   55.40
   1  -1  20  569.16   68.10
   1   1  21  163.16   33.55
  -1   1 -21   83.62   18.71
  -1   1 -21  105.97   28.41
  -1  -1 -21  165.94   31.48
  -1  -1 -21   88.84   23.71
   1  -1  21  135.58   24.27
   1   1  22  163.98   30.08
  -1   1 -22  171.07   42.34
  -1   1 -22  127.99   22.12
   1  -1  22  170.89   28.76
  -1  -1 -22  179.78   35.21
  -1  -1 -22  174.65   29.57
  -1   1 -23  310.12   38.27
   1   1  23  347.98   52.26
  -1   1 -23  365.36   35.59
  -1  -1 -23  343.89   65.60
   1  -1  23  352.74   48.54
  -1  -1 -23  301.91   44.06
   1   1  24   62.87   22.78
  -1   1 -24   36.49   17.97
  -1   1 -24   84.91   23.08
  -1  -1 -24  109.73   25.40
  -1  -1 -24   26.12   10.98
   1  -1  24   48.57   12.21
   1   1  25 2465.13   97.09
  -1   1 -25 2478.35  101.77
  -1   1 -25 2417.92   90.02
   1  -1  25 2412.02   91.01
  -1  -1 -25 2199.81   95.16
  -1  -1 -25 2191.64   91.81
   1   1  26  804.67   76.19
  -1   1 -26  682.66  133.04
  -1   1 -26  767.97   80.03
   1  -1  26  862.99   33.32
  -1  -1 -26  733.22   84.63
  -1  -1 -26  693.43   56.22
  -1   1 -27  244.91   51.82
   1   1  27  385.22   78.81
  -1   1 -27  396.23   66.75
  -1  -1 -27  332.09   83.82
   1  -1  27  419.97   81.33
  -1  -1 -27  303.71   60.23
  -1   1 -28   31.86   15.05
   1   1  28   -7.32   13.85
  -1   1 -28   52.77   16.39
  -1  -1 -28   23.73   16.02
   1  -1  28   31.41   15.29
   1   1  29  298.23   58.41
  -1   1 -29  241.99   75.84
   1  -1  29  359.53   38.09
  -1  -1 -29  232.83   65.56
  -1  -1 -29  146.21   54.08
   1   2 -29 1097.26  186.78
  -1   2  29 1555.88   95.78
  -1  -2  29 1208.55  135.71
   1  -2 -29 1135.77  119.89
  -1   2  28  147.40   36.75
   1   2 -28  130.58   37.80
  -1  -2  28  173.13   35.61
   1  -2 -28  123.44   29.08
  -1   2  27  198.47   45.71
   1   2 -27  172.84   30.19
  -1  -2  27  170.95   34.10
   1  -2 -27  152.32   42.11
  -1   2  26   13.82   10.99
   1   2 -26   21.46   16.10
  -1  -2  26   25.62    9.81
   1  -2 -26   56.43   16.49
   1  -2 -26   29.02   14.64
  -1   2  25 1734.05  158.79
   1   2 -25 1762.81  106.23
   1  -2 -25 1577.96   99.47
  -1  -2  25 1878.42   80.01
   1  -2 -25 1695.07   88.65
  -1   2  24   43.95   11.20
   1   2 -24   27.25   10.30
   1   2 -24   23.14   19.99
   1  -2 -24   42.77   22.22
   1  -2 -24   43.06   11.35
  -1  -2  24   48.76   13.32
  -1   2  23  128.98   23.25
   1   2 -23  173.86   35.44
   1   2 -22 5545.80  224.15
   1   2 -22 4936.61  192.52
  -1   2  22 4752.76  186.13
   1  -2 -22 4585.48  204.58
   1  -2 -22 5368.19  215.46
  -1   2  21 4525.39  168.12
   1   2 -21 5384.88  206.66
   1   2 -21 5449.06  198.57
   1  -2 -21 5309.43  203.18
   1  -2 -21 5477.90  199.99
   1   2 -20 1221.54   66.55
  -1   2  20 1241.43   65.97
   1   2 -20 1394.34  148.41
  -1   2  20 1232.58   63.34
  -1  -2  20 1358.06   73.21
   1  -2 -20 1261.48   95.02
  -1  -2  20 1269.50   69.33
   1  -2 -20 1247.55   89.46
   1   2 -19  210.23   34.24
  -1   2  19  268.61   39.94
   1   2 -19  257.04   43.04
  -1   2  19  176.74   32.17
   1  -2 -19  223.09   36.99
  -1  -2  19  276.12   43.75
  -1  -2  19  186.63   33.99
   1  -2 -19  254.99   40.17
   1   2 -18 1298.73   77.47
  -1   2  18 1235.24  104.12
   1   2 -18 1299.72   99.51
  -1   2  18 1229.00   76.10
  -1  -2  18 1219.32   92.18
   1  -2 -18 1295.37   92.49
  -1  -2  18 1124.05   69.54
   1  -2 -18 1247.56   91.71
  -1   2  17 2312.12   93.08
  -1   2  17 2279.97   87.13
   1   2 -17 2316.40   93.60
   1   2 -17 2244.67   84.94
  -1  -2  17 2288.04   89.00
   1  -2 -17 2369.26  107.77
  -1  -2  17 2325.27   87.36
   1  -2 -17 2048.36   86.19
   1   2 -16   -5.17    4.96
  -1   2  16   22.75    7.33
   1   2 -16   46.56   10.97
  -1   2  16    5.02    4.08
  -1  -2  16   -2.85   10.24
   1  -2 -16   13.38    4.08
  -1  -2  16    1.60    5.55
   1  -2 -16   11.04   21.42
  -1   2  15   99.14   17.67
  -1   2  15   66.59   11.43
   1   2 -15   64.17   10.82
   1   2 -15   46.84    7.62
   1   2 -15   48.96   20.92
  -1  -2  15  110.77   22.37
   1  -2 -15   98.86   16.22
   1  -2 -15   69.65   11.42
  -1  -2  15   51.88    8.63
   1  -2 -15   75.40   18.38
  -1   2  14   20.58    6.26
   1   2 -14   29.87    9.39
   1   2 -14   38.60    8.15
   1   2 -14   27.26    7.88
   1  -2 -14   25.92    7.19
  -1  -2  14   13.87   10.04
   1  -2 -14   56.99   14.78
   1  -2 -14   44.85    9.73
  -1  -2  14   33.99    7.33
  -1  -2  14   27.75   10.76
  -1   2  1316625.49  302.21
  -1   2  1316667.97  314.42
   1   2 -1316964.62  314.60
   1   2 -1316820.11  299.60
  -1  -2  1315961.56  296.15
   1  -2 -1316122.84  297.09
   1  -2 -1316594.16  310.01
   1  -2 -1316712.71  300.92
  -1  -2  1316561.64  297.57
  -1  -2  1317107.59  310.39
  -1   2  12  186.19   25.26
   1   2 -12  163.69   21.61
  -1   2  12  141.22   17.43
  -1   2  12  119.93   18.94
   1   2 -12  122.63   22.30
   1   2 -12   98.12   14.10
  -1  -2  12   98.87   15.30
  -1  -2  12  117.38   21.52
   1  -2 -12  153.86   24.17
  -1  -2  12  153.71   19.96
   1  -2 -12  180.89   25.80
   1  -2 -12  152.94   16.97
  -1   2  11   65.35   13.32
   1   2 -11   49.99    8.71
  -1   2  11   78.93   12.73
   1   2 -11  122.60   20.96
   1   2 -11   37.03    8.06
  -1  -2  11   81.04   12.04
  -1  -2  11   80.14   13.60
   1  -2 -11   75.48   17.07
   1  -2 -11  104.07   15.19
  -1  -2  11   90.56   13.66
   1  -2 -11   73.70   13.68
   1   2 -1045270.01  499.27
  -1   2  1044029.37  473.76
   1   2 -1042811.40  460.38
  -1   2  1045070.69  490.88
   1   2 -1044594.56  472.86
  -1   2  1045693.19  488.80
  -1  -2  1044381.42  491.52
   1  -2 -1045503.17  495.59
  -1  -2  1044980.81  481.29
   1  -2 -1045545.06  486.80
  -1  -2  1044620.98  474.80
   1  -2 -1044960.49  486.49
   1   2  -911592.58  235.63
   1   2  -911267.45  224.41
  -1   2   910711.63  212.96
   1   2  -911818.00  233.95
  -1   2   911566.47  228.55
  -1  -2   911696.92  235.81
  -1  -2   911892.13  235.88
   1  -2  -911791.72  235.37
  -1  -2   911774.95  230.92
   1  -2  -911758.64  232.12
   1  -2  -911972.82  243.39
   1   2  -8 1431.16   44.33
   1   2  -8 1403.12   39.77
  -1   2   8 1319.03   48.05
   1   2  -8 1438.81   38.58
  -1   2   8 1453.56   40.44
  -1  -2   8 1393.88   43.19
  -1  -2   8 1465.55   48.94
   1  -2  -8 1531.19   43.01
  -1  -2   8 1497.27   40.32
   1  -2  -8 1374.03   38.33
   1  -2  -8 1380.43   44.01
  -1   2   7    8.29    4.82
   1   2  -7    6.65    9.02
   1   2  -7   10.58    5.62
  -1   2   7   20.49    9.34
   1   2  -7   13.53    4.39
  -1  -2   7   14.34    8.98
  -1  -2   7   -3.35    8.70
   1  -2  -7    5.91    5.46
   1  -2  -7    9.64    8.87
  -1  -2   7    4.16    2.92
   1  -2  -7   -1.12    5.88
   1  -2  -7   -6.21   12.25
   1   2  -6 1315.67   45.26
   1   2  -6 1306.18   46.97
  -1   2   6 1221.76   43.74
  -1   2   6 1241.90   44.32
   1   2  -6 1234.24   47.41
  -1  -2   6 1400.50   48.08
  -1  -2   6 1239.00   47.30
   1  -2  -6 1276.28   45.39
   1  -2  -6 1297.93   46.70
  -1  -2   6 1281.92   43.48
   1  -2  -6 1335.56   46.85
   1  -2  -6 1306.58   53.21
   1   2  -5 6668.87  130.80
  -1   2   5 6528.61  130.11
   1   2  -5 6479.73  129.05
  -1   2   5 6671.12  132.59
   1   2  -5 6761.20  137.66
  -1  -2   5 6700.29  134.07
  -1  -2   5 6305.82  127.47
   1  -2  -5 6851.86  136.59
   1  -2  -5 6536.75  131.63
  -1  -2   5 6678.69  131.00
   1  -2  -5 6679.89  133.19
   1  -2  -5 6445.78  139.83
  -1   2   4 1779.75   47.10
   1   2  -4 1799.11   47.67
   1   2  -4 1882.08   51.92
   1   2  -4 1799.27   45.71
  -1  -2   4 1863.72   49.83
  -1  -2   4 1784.35   48.70
   1  -2  -4 1862.61   54.62
   1  -2  -4 1911.53   50.22
  -1  -2   4 1841.20   46.78
   1  -2  -4 1731.77   47.10
   1   2  -3   19.35    8.93
  -1   2   3   11.28    5.17
  -1   2   3   19.85    7.84
  -1   2   3   11.72    3.57
   1   2  -3    4.74    8.29
   1  -2  -3   32.73    6.94
  -1  -2   3   23.40    8.09
  -1  -2   3   29.20    9.73
  -1  -2   3   12.58    3.23
   1  -2  -3   23.95    5.90
   1  -2  -3   16.91    8.24
   1   2  -232323.88  274.46
   1   2  -232427.75  276.55
  -1   2   233433.74  282.23
   1   2  -232617.85  279.79
  -1   2   231914.91  271.42
   1   2  -232617.37  274.29
   1  -2  -232707.27  275.63
   1  -2  -233924.30  286.93
  -1  -2   232838.75  279.99
   1  -2  -234492.51  292.94
  -1   2  -217164.62  146.40
   1   2   217263.85  151.30
  -1   2  -217532.30  151.81
   1   2   217814.43  154.70
   1   2   216828.71  145.97
  -1   2  -216942.75  146.93
  -1  -2  -217125.55  147.57
   1  -2   217196.73  149.50
  -1  -2  -217749.52  154.53
  -1  -2  -217018.07  148.46
   1  -2   217884.43  152.38
   1   2   3  137.15   11.26
   1   2   3  151.25   14.79
  -1   2  -3  147.21    9.50
  -1   2  -3  170.83   20.60
  -1   2  -3  154.11   11.32
   1   2   3  127.97    9.34
  -1  -2  -3  167.24   15.67
  -1  -2  -3  136.50   10.22
   1  -2   3  164.70   10.39
   1  -2   3  177.68   11.13
   1  -2   3  173.49   17.25
  -1  -2  -3  137.75   10.70
  -1   2  -4   20.12    7.59
   1   2   4   31.82    9.65
  -1   2  -4   26.10    8.73
  -1   2  -4   24.96    8.39
   1   2   4   18.02    6.83
   1   2   4   21.76    8.67
   1  -2   4   14.20    5.41
   1  -2   4   31.06   10.61
  -1  -2  -4   16.04    8.65
   1  -2   4   19.16    8.28
  -1  -2  -4   23.43   10.75
  -1  -2  -4   24.34    8.60
  -1   2  -5 6746.35  134.08
  -1   2  -5 7257.46  116.58
   1   2   5 7330.15  117.72
   1   2   5 7449.96  121.02
  -1   2  -5 7346.47  119.27
   1  -2   5 7109.92   37.79
  -1  -2  -5 7113.78   34.28
  -1  -2  -5 7222.98  118.32
   1  -2   5 7077.04   31.81
   1  -2   5 7082.53   37.27
  -1  -2  -5 7358.76  118.53
  -1  -2  -5 6965.76   34.27
  -1   2  -6  553.54   21.23
   1   2   6  584.18   25.64
   1   2   6  600.63   23.08
  -1   2  -6  677.18   39.31
  -1   2  -6  643.41   28.02
   1  -2   6  680.10   36.78
   1  -2   6  629.89   31.90
  -1  -2  -6  635.18   29.59
  -1  -2  -6  594.93   23.68
   1  -2   6  649.54   28.87
  -1  -2  -6  629.06   25.43
  -1  -2  -6  508.33   29.65
  -1   2  -7 5083.24  106.56
  -1   2  -7 4625.32   95.56
   1   2   7 4936.10  101.19
  -1   2  -7 5263.00  108.33
   1   2   7 5302.86  108.10
   1  -2   7 4880.48  101.19
   1  -2   7 5268.48  107.18
  -1  -2  -7 5066.96  103.71
   1  -2   7 5136.02  104.68
  -1  -2  -7 5174.30  107.82
  -1  -2  -7 5059.05  107.55
  -1   2  -8 1441.90   41.61
   1   2   8 1191.99   44.60
  -1   2  -8 1492.79   41.25
   1   2   8 1340.58   47.76
  -1   2  -8 1405.94   43.08
   1  -2   8 1456.03   47.53
   1  -2   8 1415.10   43.86
  -1  -2  -8 1460.11   46.57
  -1  -2  -8 1561.65   53.10
  -1  -2  -8 1428.87   43.02
   1  -2   8 1414.27   39.98
  -1  -2  -8 1354.51   51.51
  -1   2  -9  714.84   27.69
   1   2   9  824.95   32.10
  -1   2  -9  891.19   39.27
  -1   2  -9  857.36   34.06
  -1  -2  -9  887.72   36.99
   1  -2   9  855.18   35.19
  -1  -2  -9  828.38   35.54
  -1  -2  -9  697.15   38.49
  -1  -2  -9  760.73   32.92
   1  -2   9  902.10   35.00
   1  -2   9  894.83   35.45
   1   2  1018746.55  208.50
  -1   2 -1017679.08  196.51
  -1   2 -1018281.61  212.58
  -1  -2 -1018827.94  210.54
  -1  -2 -1018589.70  209.69
   1  -2  1018677.79  213.82
  -1  -2 -1018163.20  209.32
  -1  -2 -1018876.48  211.46
   1  -2  1018641.22  205.92
   1  -2  1019290.80  215.75
  -1   2 -11 4627.66  102.13
   1   2  11 4632.12  111.47
   1   2  11 4603.63  102.36
  -1   2 -11 4450.32  102.25
  -1   2 -11 4234.64   95.03
  -1  -2 -11 4682.13  104.13
  -1  -2 -11 4703.46  114.95
   1  -2  11 4717.43  106.83
  -1  -2 -11 4788.22  107.16
   1  -2  11 4799.37  106.15
  -1  -2 -11 4679.25  104.89
   1  -2  11 5076.57  117.84
  -1   2 -12 2217.02   67.39
   1   2  12 2482.60   84.65
  -1   2 -12 2417.23   74.02
   1   2  12 2376.80   74.09
  -1   2 -12 2228.70   71.46
   1  -2  12 2315.85   71.40
  -1  -2 -12 2395.18   78.83
  -1  -2 -12 2407.14   77.52
  -1  -2 -12 2349.92   73.10
  -1  -2 -12 2460.19   78.52
   1  -2  12 2480.65   75.15
   1  -2  12 2412.10   77.44
  -1   2 -13 1872.02   67.17
  -1   2 -13 1940.99   65.96
   1   2  13 2047.29   69.59
   1   2  13 2024.76   67.90
  -1   2 -13 1930.45   76.19
   1  -2  13 1841.22   64.95
  -1  -2 -13 1944.29   72.08
  -1  -2 -13 2059.85   70.09
  -1  -2 -13 1984.13   68.58
  -1  -2 -13 2024.27   81.57
   1  -2  13 2029.76   67.73
   1  -2  13 1861.20   65.98
  -1   2 -14   19.44    7.23
  -1   2 -14   54.19   12.59
   1   2  14   32.06    9.18
  -1   2 -14   88.79   18.81
   1   2  14   57.36   12.04
  -1  -2 -14   33.89    8.56
   1  -2  14   57.36   13.00
   1  -2  14   73.81   11.42
  -1  -2 -14   52.87   11.42
  -1  -2 -14   65.09   14.38
  -1  -2 -14   88.11   17.97
   1  -2  14   83.59   11.00
   1   2  15 1552.32   60.58
   1   2  15 1689.68   66.64
  -1   2 -15 1584.30   27.45
  -1   2 -15 1629.37   71.10
   1  -2  15 1707.45   77.18
   1  -2  15 1476.19   60.87
  -1  -2 -15 1484.75   59.86
  -1  -2 -15 1599.77   57.17
  -1  -2 -15 1578.05   63.28
   1  -2  15 1546.19   60.34
  -1   2 -16 3184.33  105.72
   1   2  16 3317.80  111.30
  -1   2 -16 3035.94  102.72
   1   2  16 3060.78   98.10
   1  -2  16 3217.75  103.01
  -1  -2 -16 3099.99  100.59
   1  -2  16 3015.72  102.18
  -1  -2 -16 3319.95  112.21
  -1   2 -17  384.39   34.54
   1   2  17  433.30   45.42
  -1   2 -17  480.46   60.30
   1   2  17  299.25   46.37
  -1  -2 -17  413.61   75.76
   1  -2  17  516.19   69.63
   1  -2  17  349.78   36.64
  -1  -2 -17  471.02   51.50
  -1   2 -18  480.35   69.74
   1   2  18  364.39   43.87
  -1   2 -18  502.07   57.87
   1   2  18  302.50   51.15
   1  -2  18  408.96   45.59
  -1  -2 -18  463.89   53.94
   1  -2  18  305.10   46.54
  -1  -2 -18  423.63   69.81
  -1   2 -19   -2.91   11.46
   1   2  19  -12.57   13.00
  -1   2 -19    2.72    7.79
  -1  -2 -19   28.48   17.36
   1  -2  19   24.52   13.84
  -1  -2 -19   22.27   11.40
   1  -2  19   16.21   10.29
  -1   2 -20 9217.71  299.32
   1   2  20 9018.70  294.58
  -1   2 -20 9449.40  318.01
  -1  -2 -20 7888.12  271.61
   1  -2  20 8806.48  287.06
  -1  -2 -20 9174.26  299.46
  -1   2 -21  130.78   28.92
   1   2  22  811.84   86.34
  -1   2 -22  725.78   65.62
  -1   2 -22  684.26   66.97
   1  -2  22  734.03   84.83
  -1  -2 -22  714.68  101.56
  -1  -2 -22  740.33   56.19
  -1   2 -23  767.68   55.56
   1   2  23  824.32   93.80
  -1   2 -23  741.40  117.79
  -1  -2 -23  714.59  118.80
   1  -2  23  777.40   91.37
  -1  -2 -23  798.30   54.82
  -1   2 -24  994.15   55.97
   1   2  24  986.58   42.93
  -1   2 -24  864.34   95.85
   1  -2  24  956.48   65.07
  -1  -2 -24  881.47   90.74
  -1  -2 -24 1086.21  138.54
  -1   2 -25  486.79   94.96
   1   2  25  628.99   87.90
  -1   2 -25  592.58   83.71
  -1  -2 -25  663.75   93.14
   1  -2  25  559.93   53.07
  -1   2 -26  107.19   23.58
   1   2  26  130.36   25.20
  -1   2 -26  155.76   29.65
  -1  -2 -26  153.74   41.89
   1  -2  26  145.76   25.60
  -1  -2 -26   96.09   28.65
   1   2  27  151.32   27.26
  -1   2 -27  123.98   33.28
  -1   2 -27   58.40   23.49
   1  -2  27  147.69   25.19
  -1  -2 -27  189.93   31.85
  -1  -2 -27  101.97   25.23
   1   2  28   20.28   11.22
  -1   2 -28   21.20   14.40
  -1   2 -28   54.60   12.15
  -1  -2 -28   27.52   17.49
  -1  -2 -28    4.23    5.80
   1  -2  28   24.76    7.55
   1   2  29   22.23   11.48
  -1   2 -29   -3.28   21.08
   1  -2  29   18.33   12.19
  -1  -2 -29  -28.97   23.88
   1   3 -29  140.75   31.29
  -1   3  29  102.76   28.65
  -1  -3  29  106.31   30.05
   1  -3 -29   39.23   20.60
   1   3 -28  186.38   71.45
  -1   3  28  353.12   57.41
  -1  -3  28  324.61   54.24
   1  -3 -28  371.07   56.68
  -1   3  27 1458.45   75.98
   1   3 -27 1017.81  190.20
  -1  -3  27 1407.33  144.28
   1  -3 -27 1490.92   84.54
   1  -3 -27 1331.74   90.94
  -1   3  26  120.51   25.17
   1   3 -26   57.88   26.11
  -1  -3  26  104.52   20.53
   1  -3 -26  102.50   21.54
   1  -3 -26   80.86   20.18
  -1   3  25  143.94   21.88
   1   3 -25  157.27   44.73
   1   3 -25   66.71   21.75
  -1  -3  25  148.98   24.99
   1  -3 -25  149.74   34.11
   1  -3 -25  116.23   19.77
  -1   3  24  161.23   34.48
   1   3 -24  171.41   46.69
   1   3 -24  168.65   29.25
  -1  -3  24  187.06   31.91
   1  -3 -24  245.38   38.18
   1  -3 -24  138.99   34.73
  -1   3  23 2033.12   89.37
   1   3 -23 2068.24   96.41
   1   3 -23 1946.66   82.75
  -1  -3  23 2032.66   90.89
   1  -3 -23 1669.82  143.31
   1  -3 -23 1777.06   89.80
  -1   3  22 1469.33   82.04
   1   3 -22 1578.15  194.80
   1   3 -22 1439.05   80.40
  -1  -3  22 1549.40   87.02
   1  -3 -22 1520.83   94.55
   1  -3 -22 1514.81   83.73
  -1  -3  22 1263.56   62.91
  -1   3  21  157.32   40.66
  -1  -3  21  137.54   38.87
   1  -3 -21  276.07   38.96
   1   3 -2013249.24 1313.05
  -1   3  2011718.78  381.21
   1   3 -2012403.74  406.09
   1  -3 -2012361.82  406.62
  -1  -3  2012907.33 1282.44
   1  -3 -2013556.96 1344.05
  -1  -3  2012398.70  397.71
   1   3 -19    4.44    2.74
  -1   3  19   -0.28   11.50
   1   3 -19   15.44   11.32
   1  -3 -19   60.23   29.66
  -1  -3  19   -0.28   10.87
   1  -3 -19   13.61    7.53
  -1  -3  19    6.29    4.27
  -1   3  18  109.59   21.63
  -1   3  18  125.68   20.08
   1   3 -18  144.00   29.83
   1   3 -18  122.73   21.88
  -1  -3  18  176.45   30.13
   1  -3 -18  124.80   18.41
  -1  -3  18  110.42   20.39
   1  -3 -18  200.43   36.03
  -1   3  17  469.32   48.71
  -1   3  17  416.37   42.52
   1   3 -17  448.77   47.98
   1   3 -17  430.79   46.02
  -1  -3  17  500.58   62.32
   1  -3 -17  483.99   57.88
  -1  -3  17  432.38   34.19
   1  -3 -17  483.41   58.93
   1   3 -16  747.26   48.40
  -1   3  16  927.02   69.68
   1   3 -16  696.66   72.98
  -1   3  16  760.62   47.00
  -1  -3  16  851.96   59.38
   1  -3 -16  837.15   52.05
  -1  -3  16  842.30   51.17
   1  -3 -16  661.72   51.10
   1   3 -1510083.88  210.44
  -1   3  15 9296.14  197.59
   1   3 -15 8569.05  190.00
  -1   3  15 9856.62  206.73
  -1  -3  15 9453.48  199.44
   1  -3 -1510103.24  211.54
  -1  -3  15 9456.51  197.59
   1  -3 -15 8497.65  198.51
   1   3 -14  633.00   33.77
  -1   3  14  620.32   37.92
  -1   3  14  678.92   37.47
   1   3 -14  604.34   61.17
   1   3 -14  669.53   52.15
  -1  -3  14  658.00   37.13
   1  -3 -14  834.70   95.57
  -1  -3  14  629.21   37.98
   1  -3 -14  588.91   62.74
  -1  -3  14  674.27   37.03
   1  -3 -14  784.64   60.28
   1  -3 -14  690.93   54.80
  -1   3  13 1519.10   52.70
  -1   3  13 1492.19   49.07
   1   3 -13 1771.21   60.67
   1   3 -13 1609.92   53.06
   1   3 -13 1714.27   96.34
  -1  -3  13 1501.62   59.02
   1  -3 -13 1612.72   70.19
   1  -3 -13 1538.73  261.10
   1  -3 -13 1581.86   54.96
  -1  -3  13 1560.48  264.26
  -1  -3  13 1474.41   49.96
  -1   3  1220884.58  251.90
  -1   3  1221383.73  256.97
   1   3 -1221250.21  255.85
   1   3 -1221821.18  256.47
   1   3 -1221937.45  270.31
  -1  -3  1221118.74  275.23
   1  -3 -1221204.46  265.88
   1  -3 -1220324.73  246.95
   1  -3 -1221779.76  266.25
  -1  -3  1221608.53  258.09
  -1  -3  1220276.34  249.09
   1   3 -11 1907.47   58.52
  -1   3  11 1685.06   54.64
  -1   3  11 1871.44   65.04
   1   3 -11 1734.98   53.91
   1   3 -11 1847.71   61.62
  -1  -3  11 1795.47   59.49
   1  -3 -11 1880.22   72.23
  -1  -3  11 1998.52   73.51
   1  -3 -11 1926.68   97.36
  -1  -3  11 1824.11   56.80
   1  -3 -11 1839.89   60.30
   1  -3 -11 1762.21   57.26
   1   3 -10    8.54    5.28
  -1   3  10    9.96    5.88
  -1   3  10   -0.17    4.85
   1   3 -10   11.39    8.76
   1   3 -10   19.33    7.25
   1  -3 -10   16.09   11.21
   1  -3 -10    3.19    8.20
  -1  -3  10   15.73    8.23
   1  -3 -10   15.97    6.43
  -1  -3  10   -3.24    4.81
   1  -3 -10    7.28    5.06
  -1  -3  10   17.10    5.86
  -1   3   9  473.72   22.31
   1   3  -9  484.69   22.59
  -1   3   9  479.89   22.65
   1   3  -9  506.26   52.48
   1   3  -9  510.92   22.03
   1  -3  -9  532.73   35.27
  -1  -3   9  480.19   27.74
   1  -3  -9  475.02   28.36
   1  -3  -9  554.17   59.88
  -1  -3   9  528.27   26.26
   1  -3  -9  524.27   34.07
  -1  -3   9  521.41   27.00
   1   3  -8 8501.73  136.46
  -1   3   8 8613.44  138.48
   1   3  -8 8793.59  146.15
   1   3  -8 8594.94  136.50
   1  -3  -8 8972.91  144.49
  -1  -3   8 8319.69  137.93
   1  -3  -8 8498.02  147.45
   1  -3  -8 8928.67  146.31
  -1  -3   8 8793.22  138.86
   1  -3  -8 8580.28  137.36
  -1  -3   8 8878.24  143.42
   1   3  -7  134.76   11.63
  -1   3   7  186.12   28.13
   1   3  -7  164.60   22.52
  -1   3   7  177.23   25.04
   1   3  -7  182.99   29.63
  -1  -3   7  151.47   27.35
  -1  -3   7  137.07   13.17
   1  -3  -7  155.27   23.31
   1  -3  -7  158.76   26.20
  -1  -3   7  109.28    7.02
   1  -3  -7  138.18   11.31
   1  -3  -7  134.22   25.38
   1   3  -6   72.42    9.77
  -1   3   6   70.63   10.71
   1   3  -6   51.04    7.21
  -1   3   6   74.22   13.80
   1   3  -6   78.56   14.61
  -1  -3   6   80.40   13.99
  -1  -3   6   85.37   12.19
   1  -3  -6   69.88   11.03
   1  -3  -6   52.42    7.22
  -1  -3   6   64.25    9.03
   1  -3  -6   60.24   11.84
   1  -3  -6   70.48   15.11
  -1   3   5  199.19   14.40
  -1   3   5  248.53   14.29
   1   3  -5  233.44   21.02
  -1   3   5  271.41   24.73
   1   3  -5  231.94   11.67
   1   3  -5  226.43   15.36
   1  -3  -5  207.59   13.31
   1  -3  -5  232.80   13.11
  -1  -3   5  219.52   13.35
  -1  -3   5  212.22   10.72
   1  -3  -5  228.81   25.34
  -1  -3   5  214.35   14.10
   1   3  -4 7372.88  117.19
  -1   3   4 7400.50  118.57
  -1   3   4 7311.93  115.46
  -1   3   4 7425.49  122.35
   1   3  -4 7428.43  121.07
   1   3  -4 7364.19  114.56
  -1  -3   4 7321.67  116.79
   1  -3  -4 7364.58  118.18
   1  -3  -4 7570.01  119.44
  -1  -3   4 7555.46  117.66
   1  -3  -4 7568.38  121.25
  -1  -3   4 7330.09  119.88
   1   3  -310092.81  158.11
  -1   3   310145.17  159.83
  -1   3   3 9964.15  155.66
   1   3  -310117.98  161.43
  -1   3   3 9393.78  148.44
   1  -3  -310194.48  160.84
  -1  -3   3 9707.32  153.79
   1  -3  -310400.12  161.95
  -1  -3   3 9969.85  154.71
  -1  -3   310036.57  156.45
  -1  -3   3 9805.42  154.22
   1  -3  -310250.56  162.63
  -1   3   2  322.86   16.50
   1   3  -2  340.38   19.12
   1   3  -2  352.14   19.65
  -1   3   2  317.79   17.66
   1   3  -2  283.38   15.80
  -1  -3   2  330.64   23.71
   1  -3  -2  313.29   23.64
  -1  -3   2  319.93   19.50
   1  -3  -2  372.92   26.56
  -1  -3   2  342.41   20.84
   1  -3  -2  301.46   14.34
  -1   3   134042.88  285.47
   1   3  -134000.56  291.15
   1   3  -135148.27  298.35
  -1   3   133505.03  285.94
   1   3  -133528.54  286.84
  -1   3   133256.30  283.09
  -1  -3   134565.56  295.00
   1  -3  -134284.73  291.89
  -1  -3   133813.07  287.96
   1   3   1 8903.18  141.61
   1   3   1 8205.70  129.53
   1   3   1 8711.03  136.85
  -1   3  -1 8642.74  135.82
  -1   3  -1 8352.80  131.20
   1  -3   1 8575.19  132.09
  -1  -3  -1 8557.17  135.69
  -1  -3  -1 8891.44  141.52
   1  -3   1 8578.72  135.23
  -1  -3  -1 8988.15  141.69
   1  -3   1 8895.21  139.61
  -1   3  -2 1136.02   40.05
  -1   3  -2 1194.27   40.61
   1   3   2 1134.88   41.23
   1   3   2 1183.22   42.16
  -1   3  -2 1117.84   39.83
   1   3   2 1124.16   39.73
   1  -3   2 1147.17   38.91
  -1  -3  -2 1132.38   40.38
  -1  -3  -2 1103.36   39.35
   1  -3   2 1091.18   38.30
  -1  -3  -2 1129.51   42.49
   1  -3   2 1152.61   40.65
  -1   3  -3 1469.14   38.40
  -1   3  -3 1620.21   44.13
   1   3   3 1469.73   40.04
  -1   3  -3 1572.70   48.31
   1   3   3 1578.08   44.86
   1   3   3 1634.90   46.18
   1  -3   3 1596.23   43.52
   1  -3   3 1585.11   41.71
   1  -3   3 1550.78   42.16
  -1  -3  -3 1503.05   40.92
  -1  -3  -3 1465.73   40.47
  -1  -3  -3 1573.12   42.93
  -1   3  -4 4350.83   88.34
  -1   3  -4 4309.00   87.44
   1   3   4 4385.37   89.60
   1   3   4 4473.10   90.96
  -1   3  -4 4275.44   87.51
   1   3   4 4348.54   88.69
  -1  -3  -4 4602.83   94.57
   1  -3   4 4380.79   90.26
   1  -3   4 4599.30   91.92
   1  -3   4 4479.78   90.64
  -1  -3  -4 4422.76   89.51
  -1  -3  -4 4481.28   91.90
  -1   3  -5 9051.42  143.13
   1   3   5 9398.36  149.73
   1   3   5 9366.21  149.49
   1   3   5 9633.78  153.67
  -1   3  -5 9389.06  148.86
  -1   3  -5 8985.85  145.01
   1  -3   5 9735.91  154.19
   1  -3   5 9566.32  153.05
  -1  -3  -5 9181.78  147.01
   1  -3   5 9351.40  148.42
  -1  -3  -5 9252.84  148.29
  -1  -3  -5 9221.22  146.93
   1   3   6 9459.91  151.62
  -1   3  -6 8999.61  142.55
   1   3   610012.34  159.95
  -1   3  -6 9999.22  159.86
  -1   3  -6 9232.55  150.97
  -1  -3  -6 9466.54  151.32
   1  -3   6 9484.45  152.50
  -1  -3  -6 9311.80  149.07
   1  -3   6 9236.41  147.10
   1  -3   6 9800.08  154.78
  -1  -3  -6 9842.03  158.49
   1   3   7  840.90   32.02
   1   3   7  830.88   31.10
  -1   3  -7  808.73   34.04
  -1   3  -7  988.58   48.72
  -1   3  -7  940.67   45.73
   1  -3   7  983.15   40.22
   1  -3   7  927.70   36.16
  -1  -3  -7  897.40   34.33
  -1  -3  -7  916.25   34.46
   1  -3   7  910.22   33.56
  -1  -3  -7  922.78   35.34
  -1  -3  -7  889.45   43.35
   1   3   811164.68  178.98
  -1   3  -811186.37  177.61
   1   3   811520.50  184.16
  -1   3  -811919.46   55.89
   1  -3   811194.10  182.66
   1  -3   811786.18   51.94
  -1  -3  -811786.11   56.38
  -1  -3  -811904.69   66.75
  -1   3  -9 3872.79   86.93
   1   3   9 3550.06  101.10
  -1   3  -9 3451.94   91.77
  -1   3  -9 3714.04  106.98
   1   3   9 3443.08   91.92
  -1  -3  -9 3733.99   84.26
   1  -3   9 3516.86   96.30
  -1  -3  -9 3531.79   99.04
   1  -3   9 3531.41   94.21
   1  -3   9 3643.44   81.07
  -1  -3  -9 3162.12   86.81
  -1  -3  -9 3781.17   86.35
  -1   3 -10 6784.04  142.42
   1   3  10 7432.40  152.27
  -1   3 -10 7224.59  147.51
   1   3  10 7330.40  149.32
  -1   3 -10 7606.94  160.11
   1  -3  10 7287.53  147.25
   1  -3  10 7754.70  161.11
  -1  -3 -10 7705.23  158.87
  -1  -3 -10 7700.69  166.67
  -1  -3 -10 7455.90  163.46
   1  -3  10 7542.28  152.80
  -1  -3 -10 7463.75  155.65
  -1   3 -1114553.84  176.88
  -1   3 -1113971.74  171.85
   1   3  1114670.06  183.02
  -1   3 -1114165.51  179.73
   1  -3  1114009.40  171.70
  -1  -3 -1114623.43  182.08
   1  -3  1114375.21  183.59
  -1  -3 -1114307.77  183.33
  -1  -3 -1114714.63  183.54
   1  -3  1114748.12  180.20
  -1  -3 -1114810.35  184.76
  -1   3 -12 5164.32  122.77
  -1   3 -12 5246.19  124.57
   1   3  12 5443.59  113.40
   1   3  12 5289.14  818.28
  -1   3 -12 5468.46  116.33
   1  -3  12 5286.94  817.90
   1  -3  12 5456.52  117.66
  -1  -3 -12 5459.92  112.83
  -1  -3 -12 5460.97  114.18
  -1  -3 -12 5357.66  828.96
   1  -3  12 5466.94  113.18
  -1  -3 -12 5543.30  121.76
  -1   3 -13  855.39   40.98
   1   3  13 1049.33   46.20
  -1   3 -13 1009.00   59.14
   1   3  13  925.40   34.84
  -1   3 -13  938.60   46.12
   1  -3  13  918.34   37.74
  -1  -3 -13  961.44   45.03
  -1  -3 -13  959.40   50.10
  -1  -3 -13  934.15   37.76
  -1  -3 -13 1021.14   68.97
   1  -3  13  891.84   43.85
   1  -3  13  962.78   46.90
  -1   3 -14 1924.68   67.32
  -1   3 -14 1912.07   66.18
   1   3  14 2000.12   73.13
   1   3  14 1936.28   72.31
  -1   3 -14 1907.83   78.16
   1  -3  14 1944.42   72.93
  -1  -3 -14 2037.89   75.40
  -1  -3 -14 1834.60   65.46
  -1  -3 -14 1803.46   69.67
  -1  -3 -14 1880.34   75.03
   1  -3  14 1976.13   67.20
   1  -3  14 2025.54   72.75
  -1   3 -15   34.53   10.75
   1   3  15   12.78    8.27
  -1   3 -15   19.57    8.98
  -1   3 -15   37.33    6.83
   1   3  15    5.92    5.08
  -1  -3 -15   20.54   10.16
   1  -3  15   38.31    9.86
  -1  -3 -15   23.53   13.15
  -1  -3 -15   39.68   11.39
   1  -3  15   34.93    8.04
   1  -3  15   17.65    9.43
  -1   3 -16   38.07    9.36
   1   3  16   26.28    8.91
  -1   3 -16   29.11   13.79
   1   3  16   41.57   10.73
  -1  -3 -16   19.13   11.84
  -1  -3 -16   27.31   12.05
   1  -3  16   53.75    9.85
   1  -3  16   47.43    8.60
  -1   3 -17  874.40   67.41
   1   3  17 1112.23   96.35
  -1   3 -17  988.54  114.15
   1   3  17  884.91   62.85
   1  -3  17  977.17   79.18
  -1  -3 -17 1059.91   91.43
   1  -3  17  872.17   57.01
  -1  -3 -17 1115.32  123.71
  -1   3 -18 1346.29   61.26
   1   3  18 1271.94  167.06
  -1   3 -18 1509.73  120.71
   1   3  18 1313.29   61.25
   1  -3  18 1368.16   62.30
  -1  -3 -18 1295.16   65.52
   1  -3  18 1320.11   59.65
  -1  -3 -18 1411.27   70.53
  -1   3 -19 2911.66  107.78
  -1   3 -19 2915.59  108.77
   1  -3  19 2691.23   96.25
  -1  -3 -19 2795.25  107.70
  -1  -3 -19 2854.19  101.70
   1  -3  19 2599.44  100.23
  -1   3 -20 3209.59  122.47
   1   3  20 2928.22  115.01
  -1   3 -20 3386.32  134.99
  -1  -3 -20 2901.13  293.69
   1  -3  20 3242.19  124.93
  -1  -3 -20 3169.63  130.83
   1  -3  20 2782.46  111.92
   1   3  21 1166.22   67.16
  -1   3 -21 1285.93  142.83
  -1   3 -21 1168.33   89.10
   1  -3  21 1245.33   86.16
  -1  -3 -21 1139.81  142.89
  -1  -3 -21 1232.19   88.69
  -1   3 -22  632.03   47.68
   1   3  22  755.43   79.17
  -1   3 -22  679.12   87.57
  -1  -3 -22  676.07   77.51
   1  -3  22  649.74  251.04
  -1  -3 -22  663.07  246.82
   1   3  23  999.32   74.70
  -1   3 -23 1002.71  117.59
  -1   3 -23 1042.23   30.82
   1  -3  23 1020.19   75.37
  -1  -3 -23 1056.58  247.59
  -1  -3 -23 1018.76   45.27
   1   3  24  468.45  150.24
  -1   3 -24  444.99   52.59
  -1   3 -24  300.08   59.93
   1  -3  24  421.01   55.19
  -1  -3 -24  524.93   74.88
  -1  -3 -24  408.84   60.15
  -1   3 -25   41.39   15.92
   1   3  25   17.29   12.27
  -1   3 -25    6.24   16.22
  -1  -3 -25   11.32   13.86
   1  -3  25    9.39   10.64
   1   3  26 1231.47   56.50
  -1   3 -26  922.65  167.41
   1  -3  26 1132.29   74.70
  -1  -3 -26 1102.17  141.53
  -1  -3 -26 1145.91   38.15
   1   3  27   22.24   10.25
  -1   3 -27   34.94   15.31
   1  -3  27   10.99    7.53
  -1  -3 -27   24.57   15.36
  -1  -3 -27   15.66    7.59
   1   3  28  447.88   90.10
  -1   3 -28  386.60   59.63
  -1   3 -28  246.00   67.07
   1  -3  28  306.00  157.83
  -1  -3 -28  426.21   96.64
   1   3  29   18.15    8.00
  -1   3 -29   11.18   14.51
   1  -3  29   10.42   14.24
  -1  -3 -29   33.01   12.79
  -1  -3 -29   23.31    9.35
   1   4 -29   72.03   20.67
  -1   4  29   59.36   21.96
  -1  -4  29   59.54   12.23
   1  -4 -29   50.06   19.91
   1   4 -28  -19.24   22.61
  -1   4  28   11.48   10.91
  -1  -4  28   12.59   10.74
   1  -4 -28   27.50   10.26
   1   4 -27   28.41   10.26
  -1   4  27   27.27   10.42
  -1  -4  27   19.27    9.05
   1  -4 -27   41.95   23.54
   1  -4 -27   22.34   11.12
  -1   4  26  679.82  271.73
   1   4 -26  659.89   87.72
  -1  -4  26  665.12   85.30
   1  -4 -26  583.03   93.91
   1  -4 -26  433.93   77.94
   1   4 -25 3951.16  166.12
  -1   4  25 4123.36  177.05
   1   4 -25 4114.78  186.65
   1  -4 -25 4150.20  186.77
  -1  -4  25 3602.86  155.19
   1  -4 -25 4065.43  178.76
   1   4 -24  640.73   51.13
  -1   4  24  620.50   63.02
   1   4 -24  628.38   84.60
   1  -4 -24  591.48  127.81
  -1  -4  24  725.00   67.63
   1  -4 -24  545.14   47.83
   1   4 -23   12.27   10.82
  -1   4  23   -1.37   14.16
   1   4 -23   15.66   10.90
   1  -4 -23   -8.28   14.80
  -1  -4  23   18.00   10.32
   1  -4 -23    5.88    9.51
  -1   4  22 1737.14   95.68
   1   4 -22 1806.22  152.99
   1   4 -22 1682.89   89.96
  -1  -4  22 1832.71  104.23
   1  -4 -22 1661.11  189.62
   1  -4 -22 1691.30   93.61
   1   4 -21  503.22   41.06
  -1   4  21  649.74   91.15
   1   4 -21  578.62   93.86
   1  -4 -21  618.94   90.86
  -1  -4  21  570.62   61.00
   1  -4 -21  480.06   55.10
  -1  -4  21  414.00   27.92
  -1   4  20  200.55   39.77
  -1   4  20  106.94   26.90
   1   4 -20  233.69   53.03
   1   4 -20  182.59   36.22
  -1  -4  20  231.60   44.34
   1  -4 -20  212.19   39.27
  -1  -4  20  107.62   30.53
   1  -4 -20  219.50   43.43
   1   4 -19 1177.24   63.52
  -1   4  19 1123.01   35.25
   1   4 -19 1173.43   99.01
  -1   4  19 1137.49   62.86
  -1  -4  19 1208.70   88.05
   1  -4 -19 1117.82   58.98
  -1  -4  19 1129.59   21.07
   1  -4 -19 1190.87   87.96
   1   4 -18  613.13   47.02
  -1   4  18  806.39  123.77
   1   4 -18  789.54  108.46
  -1   4  18  549.14   46.96
  -1  -4  18  612.15   50.41
   1  -4 -18  658.87   57.78
  -1  -4  18  616.06   49.12
   1  -4 -18  822.14   95.65
   1   4 -17 2308.45   90.65
  -1   4  17 2352.41   97.65
   1   4 -17 2350.14   95.68
  -1   4  17 2309.83   94.69
  -1  -4  17 2390.79   93.78
   1  -4 -17 2345.56  101.71
  -1  -4  17 2316.47   87.69
   1  -4 -17 1918.45   93.22
   1   4 -16   24.81    5.70
  -1   4  16   14.66    9.02
   1   4 -16   17.87   10.01
  -1   4  16   25.46    5.48
  -1  -4  16   27.38    6.97
   1  -4 -16   48.22    8.49
  -1  -4  16   38.73    8.80
   1  -4 -16   52.58   13.93
   1   4 -15  209.95   14.79
  -1   4  15  271.71   40.89
   1   4 -15  255.08   34.74
  -1   4  15  216.28   33.87
  -1  -4  15  347.47   42.75
  -1  -4  15  283.47   22.60
   1  -4 -15  289.22   31.30
   1  -4 -15  325.81   61.37
   1   4 -14  506.54   31.81
  -1   4  14  498.24   30.84
  -1   4  14  548.90   41.87
   1   4 -14  519.52   57.93
   1   4 -14  547.84   48.56
  -1  -4  14  456.60   23.40
   1  -4 -14  519.38   37.29
  -1  -4  14  531.08   34.28
   1  -4 -14  491.14   61.50
  -1  -4  14  525.70   30.60
   1  -4 -14  661.79   63.63
   1  -4 -14  513.67   61.52
  -1   4  13 3029.00  102.00
  -1   4  13 3094.88  524.28
   1   4 -13 3081.07  100.62
   1   4 -13 2987.09   95.04
   1   4 -13 3092.17  524.16
  -1  -4  13 2909.69  101.71
   1  -4 -13 3116.39  104.31
   1  -4 -13 2957.95  102.04
  -1  -4  13 3045.06   96.77
   1  -4 -13 2948.81  100.98
  -1  -4  13 3162.64   78.64
   1   4 -12 1614.64   48.88
  -1   4  12 1524.87   50.74
  -1   4  12 1570.59   50.51
   1   4 -12 1754.95   85.03
   1   4 -12 1719.93   59.26
  -1  -4  12 1651.69   56.05
  -1  -4  12 1735.55   60.33
   1  -4 -12 1562.61   59.30
   1  -4 -12 1389.95  219.09
  -1  -4  12 1547.45   48.67
   1  -4 -12 1606.66   51.38
   1  -4 -12 1535.05   50.43
   1   4 -1110178.05  201.12
  -1   4  1110339.38 1598.58
  -1   4  1110581.95 1636.01
   1   4 -1110685.30 1651.51
   1   4 -1111090.26  147.06
   1  -4 -1110389.27 1606.16
  -1  -4  11 9994.84  202.25
   1  -4 -1110884.10  147.56
   1  -4 -1110972.33  142.15
  -1  -4  1111022.26  133.35
   1  -4 -1110701.93 1654.76
  -1  -4  1110769.53 1665.00
   1   4 -1012149.19  240.76
  -1   4  1011564.30  231.40
   1   4 -1011518.16  231.12
  -1   4  1011852.14  241.50
   1   4 -1012642.15  255.56
  -1  -4  1012252.42  243.61
  -1  -4  1011632.74  235.40
   1  -4 -1011523.78  230.21
   1  -4 -1011999.72  240.82
  -1  -4  1012213.57  240.39
   1  -4 -1011743.01  235.55
   1  -4 -1011866.99  242.16
   1   4  -9  147.21   18.14
  -1   4   9  172.15   24.72
   1   4  -9  193.83   23.13
  -1   4   9  182.87   23.89
   1   4  -9  190.46   29.15
  -1  -4   9  173.65   24.31
  -1  -4   9  187.97   29.86
   1  -4  -9  156.38   22.97
   1  -4  -9  132.05   15.74
  -1  -4   9  148.65   13.16
   1  -4  -9  145.42   22.34
   1  -4  -9  199.97   29.15
   1   4  -8 1652.96   58.20
   1   4  -8 1644.55   45.25
  -1   4   8 1811.18   54.08
   1   4  -8 1717.73   46.43
  -1  -4   8 1735.00   50.25
  -1  -4   8 1711.38   52.17
   1  -4  -8 1672.58   46.85
   1  -4  -8 1797.30   58.90
  -1  -4   8 1731.39   45.65
   1  -4  -8 1725.14   51.02
   1  -4  -8 1793.51   57.44
  -1   4   7  615.00   25.41
  -1   4   7  672.60   26.87
   1   4  -7  702.42   26.59
  -1   4   7  736.86   29.68
   1   4  -7  679.72   24.62
   1   4  -7  641.90   31.64
   1  -4  -7  722.23   28.88
   1  -4  -7  659.71   25.39
  -1  -4   7  773.63   30.93
  -1  -4   7  722.67   26.12
   1  -4  -7  732.79   29.38
  -1  -4   7  713.03   32.10
   1   4  -6  148.71   13.72
   1   4  -6  120.57   15.18
  -1   4   6  100.55   13.86
  -1   4   6  132.97   18.40
   1   4  -6  141.74   29.88
  -1   4   6  107.59   19.85
  -1  -4   6  119.55   19.61
   1  -4  -6   70.98   14.91
   1  -4  -6  147.19   18.58
  -1  -4   6  116.27   13.49
   1  -4  -6  149.03   26.62
  -1  -4   6  155.34   29.87
  -1   4   5 9523.94  156.54
   1   4  -5 9095.29  144.12
  -1   4   5 9092.79  145.26
   1   4  -5 9369.71  146.19
   1   4  -5 9166.04  149.27
  -1  -4   5 9255.90  146.78
   1  -4  -5 8913.86  141.46
   1  -4  -5 9222.36  148.09
  -1  -4   5 9347.06  145.97
   1  -4  -5 9169.70  146.63
  -1  -4   5 9342.35  151.13
   1   4  -4 4245.53   87.09
  -1   4   4 4183.92   86.33
   1   4  -4 4317.31   90.16
  -1   4   4 4457.31   89.68
  -1   4   4 4144.64   86.18
  -1  -4   4 4206.78   86.06
   1  -4  -4 4097.43   82.27
  -1  -4   4 3985.40   85.97
  -1  -4   4 4183.45   83.16
   1  -4  -4 4280.29   88.13
   1  -4  -4 4373.80   92.79
  -1  -4   4 4311.25   87.07
   1   4  -315417.05  135.47
  -1   4   316137.79  139.79
  -1   4   315492.75  139.21
   1   4  -315777.10  144.48
   1   4  -316281.25  150.16
  -1   4   315488.22  139.83
   1  -4  -315611.85  140.77
  -1  -4   315569.62  141.26
  -1  -4   315669.52  135.19
   1  -4  -315367.03  138.51
  -1  -4   315566.62  135.91
   1  -4  -315252.16  132.26
  -1   4   212524.11  108.45
   1   4  -212027.13   43.61
  -1   4   212128.90   45.81
   1   4  -212018.89   36.86
   1   4  -212158.11   49.14
  -1   4   212314.81  112.15
  -1  -4   212206.21  112.09
  -1  -4   212503.98  113.04
   1  -4  -212186.66  112.37
   1  -4  -212097.49   43.91
  -1   4   1 4715.68   92.37
   1   4  -1 5008.19  101.41
   1   4  -1 4791.12   97.89
   1   4  -1 5017.86  101.92
  -1   4   1 4595.83   93.30
   1  -4  -1 4813.64   97.70
  -1  -4   1 4646.83   94.12
  -1  -4   1 4822.58   97.21
   1  -4  -1 4699.41   94.53
  -1  -4   1 4564.71   92.04
   1  -4  -1 4897.93   96.08
   1  -4  -1 5072.95  105.23
   1   4   011330.03  178.12
  -1   4   011292.36  177.60
  -1   4   010949.17  171.83
   1   4   011467.65  180.32
   1   4   010933.06  171.69
   1  -4   011464.03  179.99
  -1  -4   011359.64  178.16
  -1  -4   011315.63  179.10
   1   4   116948.83  148.92
   1   4   117048.57  152.89
   1   4   117821.82  156.51
  -1   4  -117294.44  152.06
  -1   4  -117378.79  154.31
  -1  -4  -117404.07  153.36
   1  -4   117099.23  149.35
  -1  -4  -118001.71  157.88
  -1  -4  -117628.18  155.21
   1  -4   117848.10  158.25
   1   4   2  649.24   25.17
  -1   4  -2  659.07   23.89
   1   4   2  668.95   26.64
  -1   4  -2  680.20   25.78
  -1   4  -2  649.09   25.69
   1   4   2  724.89   29.01
  -1  -4  -2  673.56   25.49
  -1  -4  -2  666.31   26.04
   1  -4   2  658.72   26.19
   1  -4   2  654.55   24.65
   1  -4   2  686.69   24.33
  -1  -4  -2  694.11   27.37
  -1   4  -3  481.23   26.94
  -1   4  -3  475.27   17.55
   1   4   3  509.05   30.58
   1   4   3  441.19   18.96
   1   4   3  518.26   33.07
  -1   4  -3  446.39   21.81
  -1  -4  -3  426.53   20.72
  -1  -4  -3  482.74   25.99
   1  -4   3  467.96   18.62
   1  -4   3  473.42   19.39
  -1  -4  -3  459.89   25.26
   1  -4   3  480.87   24.74
   1   4   4   97.91   17.11
  -1   4  -4   78.47   14.67
   1   4   4   89.11   17.30
  -1   4  -4   94.96   16.79
  -1   4  -4   88.66   18.62
   1   4   4  103.33   19.07
   1  -4   4   85.50   16.26
  -1  -4  -4   74.39   12.74
   1  -4   4   91.81   14.23
   1  -4   4   74.82    6.67
  -1  -4  -4   99.17   23.86
  -1  -4  -4   86.81   14.51
   1   4   5 8506.27  136.98
  -1   4  -5 8316.07  131.59
   1   4   5 8665.24  145.97
   1   4   5 8562.07  137.81
  -1   4  -5 8420.43  137.60
  -1   4  -5 8280.71  136.96
  -1  -4  -5 8225.10  132.09
   1  -4   5 8023.75  129.50
   1  -4   5 8411.34  132.45
   1  -4   5 7671.88  122.78
  -1  -4  -5 8437.55  136.25
  -1  -4  -5 8096.17  129.88
   1   4   6  280.71   17.42
  -1   4  -6  236.79   13.30
   1   4   6  300.12   26.59
   1   4   6  282.63   16.95
  -1   4  -6  311.96   26.28
  -1   4  -6  255.66   22.46
  -1  -4  -6  284.26   18.53
  -1  -4  -6  250.42   21.29
   1  -4   6  242.72   13.85
   1  -4   6  255.51   15.82
  -1  -4  -6  283.01   18.37
   1  -4   6  281.04   16.65
   1   4   7 1101.62   41.55
  -1   4  -7 1090.09   39.69
   1   4   7  981.55   39.73
   1   4   7 1121.78   41.52
  -1   4  -7 1157.43   42.92
  -1   4  -7 1091.29   42.73
  -1  -4  -7 1105.52   41.57
  -1  -4  -7 1072.71   39.92
   1  -4   7 1111.24   41.17
   1  -4   7 1071.86   39.39
  -1  -4  -7 1045.52   41.30
   1  -4   7 1176.44   46.78
  -1   4  -8  171.80   24.06
   1   4   8  182.11   30.85
  -1   4  -8  174.55   24.08
   1   4   8  153.38   28.54
  -1   4  -8  162.02   27.91
   1  -4   8  112.25   25.68
   1  -4   8  136.83   11.41
  -1  -4  -8  187.00   25.39
  -1  -4  -8  179.67   26.82
   1  -4   8  134.69    7.64
  -1  -4  -8  128.74   23.15
  -1  -4  -8  152.83   22.91
  -1   4  -929308.96  316.41
   1   4   929153.74  316.89
  -1   4  -928646.68  310.36
   1   4   930573.77  333.01
  -1   4  -928771.16  322.48
   1  -4   929355.09  318.15
   1  -4   929090.29  322.04
  -1  -4  -929819.92  328.72
  -1  -4  -928668.41  317.87
   1  -4   929024.78  314.16
  -1  -4  -930277.61  338.48
  -1  -4  -929498.43  334.60
  -1   4 -1014406.30  162.27
  -1   4 -1013192.70  261.58
   1   4  1013687.61  435.56
   1   4  1013748.79  437.84
  -1   4 -1014300.10  170.16
   1  -4  1013279.85  262.67
   1  -4  1013623.88  435.09
  -1  -4 -1013948.25  166.51
  -1  -4 -1014105.09  165.80
   1  -4  1013921.85  156.85
  -1  -4 -1013913.38  160.11
  -1  -4 -1013665.03  438.03
  -1   4 -11 3667.46   88.82
   1   4  11 3605.40   89.61
  -1   4 -11 3402.92   83.45
   1   4  11 3364.02   85.43
  -1   4 -11 3727.93  117.35
   1  -4  11 3340.86   98.62
   1  -4  11 3504.73   94.94
  -1  -4 -11 3614.26   88.84
  -1  -4 -11 3562.69  104.87
   1  -4  11 3547.84   85.92
  -1  -4 -11 3663.88   90.70
  -1  -4 -11 3592.63   94.44
  -1   4 -12   43.98   10.75
   1   4  12   55.86    8.23
  -1   4 -12   67.66    8.23
   1   4  12   42.46   11.23
  -1   4 -12   60.40   13.69
   1  -4  12   45.46   10.37
  -1  -4 -12   46.13   11.63
  -1  -4 -12   35.51    6.91
  -1  -4 -12   39.73    7.47
   1  -4  12   53.03    8.55
  -1  -4 -12   46.70    7.05
   1  -4  12   59.99    9.78
  -1   4 -13 2549.46   84.33
  -1   4 -13 2379.74   82.31
   1   4  13 2316.22   79.28
   1   4  13 2573.42   89.76
  -1   4 -13 2353.01   82.17
   1  -4  13 2293.39   82.03
   1  -4  13 2526.11   86.59
  -1  -4 -13 2444.00   81.97
  -1  -4 -13 2602.81   88.42
  -1  -4 -13 2440.53   87.92
   1  -4  13 2570.65   85.03
  -1  -4 -13 2396.33   93.97
  -1   4 -14 1792.12   65.97
  -1   4 -14 1722.71   60.06
   1   4  14 1749.40   62.20
  -1   4 -14 1765.95   62.59
   1   4  14 1791.08   64.89
   1  -4  14 1741.04   75.02
   1  -4  14 1788.85   62.07
  -1  -4 -14 1776.82   71.48
   1  -4  14 1794.94   63.48
  -1  -4 -14 1816.65   67.12
  -1  -4 -14 1870.54   82.51
   1   4  15  192.36   22.10
  -1   4 -15  186.32   41.30
   1   4  15  233.90   49.90
  -1   4 -15  213.73   36.74
  -1   4 -15  268.26   36.43
   1  -4  15  238.80   27.31
  -1  -4 -15  190.62   24.21
   1  -4  15  190.60   24.86
  -1  -4 -15  248.73   28.24
  -1   4 -16  855.79   55.24
   1   4  16  941.54   43.55
  -1   4 -16  875.41   63.88
   1   4  16  873.09   54.76
   1  -4  16  986.38   68.53
   1  -4  16  864.21   53.44
  -1  -4 -16  913.57   66.64
  -1  -4 -16  869.70   71.74
  -1   4 -17  338.59   35.61
   1   4  17  406.25   50.28
  -1   4 -17  430.57   70.99
  -1  -4 -17  477.57   77.39
   1  -4  17  433.81   43.03
   1  -4  17  367.56   48.18
  -1  -4 -17  502.67   69.04
  -1   4 -18 2395.06   92.78
   1   4  18 2461.29   97.92
  -1   4 -18 2428.31   99.92
  -1  -4 -18 2338.66   97.49
   1  -4  18 2358.83   93.95
  -1  -4 -18 2325.10   99.44
   1  -4  18 2315.30  100.59
  -1   4 -19  431.82   59.05
   1   4  19  484.54   72.68
  -1   4 -19  440.98   53.02
  -1  -4 -19  521.10   59.91
   1  -4  19  498.62   69.90
  -1  -4 -19  435.27   59.17
   1  -4  19  321.39   57.60
  -1   4 -20  491.36   69.33
   1   4  20  550.29   71.34
  -1   4 -20  455.03   75.16
  -1  -4 -20  594.70   68.76
   1  -4  20  545.95   68.65
  -1  -4 -20  497.93   58.54
   1  -4  20  410.68   57.68
   1   4  21 8218.90  299.17
  -1   4 -21 8876.84  320.63
  -1  -4 -21 8202.11  304.97
   1  -4  21 8068.75  292.19
  -1  -4 -21 8746.59  329.71
  -1   4 -22  877.24   92.72
  -1   4 -22  784.38   97.90
   1  -4  22  544.47   20.24
  -1   4 -23  120.61   22.84
   1   4  23  170.12   19.88
  -1   4 -23  169.26   33.60
  -1  -4 -23  164.57   29.35
   1  -4  23  141.74   41.76
  -1  -4 -23  154.74   21.55
  -1   4 -24  237.12   35.40
   1   4  24  231.46   32.65
  -1   4 -24  218.14   37.41
  -1  -4 -24  154.97   36.55
   1  -4  24  228.55   40.05
  -1  -4 -24  177.24   46.86
  -1   4 -25   27.80   11.78
   1   4  25   45.93   17.02
  -1   4 -25   29.02   16.45
  -1  -4 -25   67.06   25.85
   1  -4  25   11.19    8.59
  -1  -4 -25   25.99   15.26
   1   4  26  962.72  106.02
  -1   4 -26  850.01   82.00
   1  -4  26  934.09   66.90
  -1  -4 -26  714.75  151.30
  -1  -4 -26  741.11   84.28
   1   4  27  183.46   33.41
  -1   4 -27  174.93   33.22
  -1   4 -27   88.52   19.97
   1  -4  27  135.61   35.21
  -1  -4 -27  165.55   24.52
  -1  -4 -27  155.62   25.74
   1   4  28   74.51   25.86
  -1   4 -28   28.55   27.15
  -1  -4 -28   59.08   25.04
  -1  -4 -28   71.46   13.91
   1   4  29 1449.48   89.52
  -1   4 -29 1235.63  193.10
   1  -4  29 1632.83  108.05
  -1  -4 -29 1817.24  117.32
   1   5 -29   89.47   37.10
  -1   5  29   44.37   23.50
  -1  -5  29   34.46   21.64
   1  -5 -29   19.38   12.61
   1   5 -28  391.61   77.89
  -1   5  28  542.72   80.06
  -1  -5  28  435.53  100.63
   1  -5 -28  465.24  131.64
   1   5 -27 1047.21  168.75
  -1   5  27 1192.07  137.93
  -1  -5  27 1377.51  542.47
   1  -5 -27 1334.37  152.50
   1   5 -26  318.60   31.62
  -1   5  26  276.93   50.26
  -1  -5  26  336.12   57.18
   1  -5 -26  289.85   58.97
   1   5 -25   14.68    7.91
  -1   5  25   -3.09   14.60
   1   5 -25   30.28   12.82
   1  -5 -25   -1.54   23.25
  -1  -5  25   18.63   10.60
   1  -5 -25    1.14   10.53
   1   5 -24  604.54   29.36
  -1   5  24  687.13   68.09
   1   5 -24  694.80   88.91
   1  -5 -24  733.07   95.81
  -1  -5  24  757.72   88.98
   1  -5 -24  514.07   86.57
   1   5 -23   56.02   10.12
  -1   5  23   59.70   20.02
   1   5 -23   78.18   15.92
   1  -5 -23  112.98   20.85
  -1  -5  23   50.32   16.16
   1  -5 -23   55.56   17.29
   1   5 -22 1463.58   80.50
  -1   5  22 1464.62   81.17
   1   5 -22 1477.91  107.18
   1  -5 -22 1669.22  143.51
  -1  -5  22 1519.79  104.63
   1  -5 -22 1456.77   81.62
   1   5 -21  485.17   39.46
  -1   5  21  421.31   65.59
   1   5 -21  445.14   63.98
   1  -5 -21  562.89   83.12
  -1  -5  21  512.69   47.24
   1  -5 -21  479.50   43.09
  -1  -5  21  321.65   53.20
   1   5 -20   18.91    8.48
  -1   5  20   37.68   12.33
   1   5 -20   55.87   23.20
  -1   5  20   12.17    4.59
  -1  -5  20   28.36   12.64
   1  -5 -20   38.71   12.36
  -1  -5  20   20.24    8.66
   1  -5 -20   45.40   19.28
  -1   5  19  648.04   61.47
  -1   5  19  447.08   64.56
   1   5 -19  614.75   73.66
   1   5 -19  529.20   49.25
  -1  -5  19  609.13   61.76
   1  -5 -19  587.54   73.96
  -1  -5  19  484.85   42.25
   1  -5 -19  588.10   81.68
   1   5 -18 1151.03   74.12
  -1   5  18 1175.11   75.99
   1   5 -18 1442.49  102.87
  -1   5  18 1138.02   73.89
  -1  -5  18 1272.25  170.56
   1  -5 -18 1231.52   77.73
  -1  -5  18 1235.38   75.82
   1  -5 -18 1380.45  105.75
   1   5 -17  101.58   18.12
  -1   5  17  148.66   23.76
   1   5 -17   65.28   18.87
  -1   5  17   69.50   14.35
  -1  -5  17  113.75   19.10
  -1  -5  17   97.05   19.74
   1  -5 -17  127.82   22.35
   1  -5 -17  114.12   21.13
   1   5 -16 1424.55   55.68
  -1   5  16 1366.79   56.68
   1   5 -16 1098.72   67.40
  -1   5  16 1422.61   58.17
  -1  -5  16 1425.02   62.96
  -1  -5  16 1415.80   55.86
   1  -5 -16 1423.29   62.11
   1  -5 -16 1316.38   91.42
  -1   5  15 8958.71  179.52
   1   5 -15 8958.24  175.30
  -1   5  15 8929.69  180.22
  -1  -5  15 9044.82  180.40
  -1  -5  15 9029.08  177.07
   1  -5 -15 9193.73  186.54
   1  -5 -15 9063.83  189.80
  -1   5  14 3482.89   96.03
  -1   5  14 3496.32   98.11
   1   5 -14 3335.64  108.62
   1   5 -14 3502.72   94.53
   1  -5 -14 3296.27   92.26
  -1  -5  14 3543.37  103.19
  -1  -5  14 3560.84   96.90
   1  -5 -14 3470.81  101.41
   1  -5 -14 3504.44  143.18
   1   5 -13 1746.50   65.08
  -1   5  13 1601.85   56.26
   1   5 -13 1742.41   73.22
   1   5 -13 1711.59   59.19
  -1   5  13 1717.13   59.27
  -1  -5  13 1622.39   58.69
  -1  -5  13 1604.03   60.66
   1  -5 -13 1618.18   57.40
  -1  -5  13 1628.47   55.06
   1  -5 -13 1635.08   59.78
   1  -5 -13 1650.67   74.34
   1   5 -12  831.52   29.35
  -1   5  12  743.33   31.49
   1   5 -12  793.73   57.44
  -1   5  12  842.22   41.56
   1   5 -12  824.32   35.06
  -1  -5  12  853.01   38.05
  -1  -5  12  755.46   41.89
   1  -5 -12  780.78   29.84
   1  -5 -12  790.44   51.61
  -1  -5  12  782.25   28.82
   1  -5 -12  825.31   40.88
   1  -5 -12  785.38   36.04
   1   5 -11  508.18   18.85
   1   5 -11  537.87   41.85
  -1   5  11  521.86   82.33
  -1   5  11  565.66   29.94
   1   5 -11  551.94   60.13
  -1  -5  11  588.61   36.91
  -1  -5  11  481.44   22.92
   1  -5 -11  541.07   39.64
   1  -5 -11  548.06   37.50
  -1  -5  11  499.45   18.51
   1  -5 -11  500.60   22.67
   1  -5 -11  584.31   73.19
   1   5 -10  954.71   34.70
  -1   5  10  886.02   36.05
   1   5 -10  954.57   37.37
  -1   5  10 1063.30   61.29
   1   5 -10  871.88   42.86
  -1  -5  10  972.56   37.92
  -1  -5  10  845.10   35.94
   1  -5 -10  820.06   31.60
   1  -5 -10 1079.22   86.90
  -1  -5  10  969.97   35.44
   1  -5 -10  928.59   37.10
   1  -5 -10  995.21   45.03
   1   5  -913264.97  260.34
   1   5  -912830.27  253.69
  -1   5   914022.58  167.12
  -1   5   913665.83  434.95
   1   5  -912902.34  260.06
  -1  -5   913668.58  434.87
  -1  -5   913335.33  268.92
   1  -5  -912971.43  257.49
   1  -5  -913540.18  432.45
  -1  -5   913414.31  263.60
   1  -5  -912897.23  258.30
   1  -5  -913613.16  436.71
  -1   5   8   91.30   12.83
   1   5  -8   83.01   11.80
  -1   5   8   90.43   21.26
  -1   5   8   86.00   13.95
   1   5  -8   85.02   14.78
   1   5  -8   85.11   15.54
   1  -5  -8   66.64   11.92
  -1  -5   8   93.45   22.26
  -1  -5   8  108.26   17.57
  -1  -5   8   93.20   14.52
   1  -5  -8  102.99   17.96
   1  -5  -8   81.76   14.57
   1   5  -7  249.27   14.79
   1   5  -7  228.64   13.23
  -1   5   7  261.95   28.25
  -1   5   7  253.04   15.90
   1   5  -7  337.14   54.05
  -1   5   7  255.35   18.80
  -1  -5   7  308.58   31.37
  -1  -5   7  273.76   31.65
   1  -5  -7  270.00   39.99
  -1  -5   7  265.40   17.37
   1  -5  -7  228.80   25.93
   1  -5  -7  227.85   20.92
  -1   5   6  952.24   36.06
   1   5  -6  904.20   33.14
  -1   5   6  976.16   35.80
  -1   5   6  904.71   34.41
   1   5  -6  972.56   34.82
   1   5  -6  947.97   37.80
   1  -5  -6  946.69   36.96
   1  -5  -6  914.65   33.19
  -1  -5   6 1019.48   40.16
  -1  -5   6  956.01   33.88
   1  -5  -6  924.03   36.35
  -1  -5   6  928.37   36.56
  -1   5   5 4392.00   91.78
   1   5  -5 4428.26   90.88
   1   5  -5 4644.75   98.09
  -1   5   5 4562.71   92.42
  -1   5   5 4783.58   98.51
   1  -5  -5 4653.36   96.13
  -1  -5   5 4364.40   89.23
  -1  -5   5 4370.97   91.31
  -1  -5   5 4482.89   89.89
   1  -5  -5 4275.91   89.35
   1  -5  -5 4338.27   87.82
   1   5  -424608.80  213.46
  -1   5   424349.76  215.08
  -1   5   425272.52  217.71
   1   5  -424794.97  220.17
  -1   5   423677.47  211.99
   1  -5  -424678.60  219.22
  -1  -5   424143.45  215.37
  -1  -5   424524.34  211.16
  -1  -5   424535.97  212.72
   1  -5  -425353.14  225.13
   1  -5  -423575.31  206.39
   1   5  -3 6168.21  123.12
  -1   5   3 5727.90  113.45
   1   5  -3 5836.76  118.77
   1   5  -3 5651.37  114.41
  -1   5   3 5547.89  113.36
  -1   5   3 5645.18  117.02
   1  -5  -3 5778.29  117.00
  -1  -5   3 5770.20  117.46
  -1  -5   3 5575.60  112.29
  -1  -5   3 5726.72  115.77
   1  -5  -3 5941.01  117.67
   1  -5  -3 5713.24  116.35
  -1   5   2  182.76    9.73
   1   5  -2  190.06   12.16
   1   5  -2  199.72   12.74
  -1   5   2  169.91   12.67
  -1   5   2  188.96   13.36
   1   5  -2  191.83   13.30
   1  -5  -2  196.15   10.16
  -1  -5   2  222.12   23.08
  -1  -5   2  172.35   26.89
   1  -5  -2  193.62   13.06
   1  -5  -2  188.93   13.82
  -1  -5   2  186.09   12.29
  -1   5   144698.14  374.99
   1   5  -142948.92  367.08
   1   5  -144324.78  379.04
  -1   5   143182.57  369.71
   1   5  -144441.28  381.88
  -1  -5   144112.25  376.11
  -1  -5   144983.79  384.83
   1  -5  -143710.82  373.46
   1  -5  -142550.98  364.33
   1  -5  -144991.20  387.39
   1   5   0 3298.69   85.60
   1   5   0 3368.82   87.79
  -1   5   0 3172.29   82.51
   1   5   0 3244.64   85.41
  -1   5   0 3171.12   82.79
   1  -5   0 3242.59   84.05
   1  -5   0 3390.64   89.47
  -1  -5   0 3240.91   84.23
  -1  -5   0 3206.37   84.63
  -1  -5   0 3251.41   84.00
   1   5   1 2430.71   64.60
  -1   5  -1 2537.55   67.13
   1   5   1 2686.24   71.31
   1   5   1 2452.72   64.94
  -1   5  -1 2753.92   72.44
  -1  -5  -1 2636.24   69.39
   1  -5   1 2645.11   69.80
   1  -5   1 2496.67   65.47
  -1  -5  -1 2557.77   67.58
  -1  -5  -1 2633.20   74.08
   1   5   2 1987.37   54.27
  -1   5  -2 2107.62   53.54
   1   5   2 1939.99   57.85
   1   5   2 2034.69   54.37
  -1   5  -2 2071.35   55.32
  -1   5  -2 2010.32   54.61
  -1  -5  -2 1990.71   53.22
  -1  -5  -2 1992.70   53.61
   1  -5   2 2030.71   51.78
   1  -5   2 2046.95   58.29
   1  -5   2 2057.24   58.29
  -1  -5  -2 1947.29   53.41
  -1   5  -3 5737.04  116.00
  -1   5  -3 5742.60  113.14
   1   5   3 5843.57  118.03
   1   5   3 5711.82  115.89
  -1   5  -3 5601.59  114.16
   1   5   3 5776.76  117.72
  -1  -5  -3 5676.55  114.99
   1  -5   3 5596.79  113.88
   1  -5   3 5625.65  111.37
   1  -5   3 5755.41  116.24
  -1  -5  -3 5733.17  115.93
  -1  -5  -3 5816.71  119.98
  -1   5  -4 3350.01   87.48
  -1   5  -4 3193.65   81.54
   1   5   4 3102.60   81.42
   1   5   4 3152.84   85.86
  -1   5  -4 3087.56   89.37
   1   5   4 3305.14   86.81
  -1  -5  -4 3270.98   85.59
   1  -5   4 3145.11   84.74
  -1  -5  -4 3058.24   80.04
   1  -5   4 3266.77   83.10
   1  -5   4 3115.33   81.76
  -1  -5  -4 3399.34   92.59
  -1   5  -5  540.00   23.15
  -1   5  -5  487.99   20.67
   1   5   5  475.61   20.55
  -1   5  -5  524.53   26.01
   1   5   5  504.73   21.74
   1   5   5  498.30   23.94
   1  -5   5  510.49   33.56
  -1  -5  -5  462.08   19.55
   1  -5   5  457.81   19.10
   1  -5   5  513.30   21.80
  -1  -5  -5  516.96   22.87
  -1  -5  -5  517.24   23.02
   1   5   6 3086.09   81.88
  -1   5  -6 3201.64   82.88
   1   5   6 3176.24   84.87
   1   5   6 3297.17   87.46
  -1   5  -6 3220.59   86.07
  -1   5  -6 3122.57   84.35
  -1  -5  -6 3110.65   82.28
   1  -5   6 3013.51   80.71
   1  -5   6 3161.74   86.88
   1  -5   6 3218.14   84.46
  -1  -5  -6 3129.36   83.62
  -1  -5  -6 2973.84   78.51
  -1   5  -7  475.19   21.12
  -1   5  -7  560.01   29.05
   1   5   7  503.47   22.41
   1   5   7  513.67   23.21
  -1   5  -7  482.14   23.81
   1   5   7  498.70   28.14
   1  -5   7  494.84   20.04
   1  -5   7  563.73   27.31
  -1  -5  -7  492.07   21.52
   1  -5   7  529.88   22.19
  -1  -5  -7  465.76   22.64
  -1  -5  -7  471.30   20.61
  -1   5  -8 9509.48  192.76
  -1   5  -8 9493.85  189.20
   1   5   8 9963.36  202.25
   1   5   8 9296.25  188.19
  -1   5  -8 9459.32  192.72
  -1  -5  -8 9190.76  185.12
   1  -5   8 9609.44  194.19
   1  -5   8 9405.73  190.67
  -1  -5  -810042.83  201.39
   1  -5   8 9169.85  183.76
  -1  -5  -8 9454.33  192.38
  -1   5  -9   34.78   13.96
   1   5   9   11.78    6.87
  -1   5  -9    1.55    4.82
   1   5   9    3.60    5.22
  -1   5  -9    2.28    8.74
   1  -5   9   -3.08    7.41
   1  -5   9   -8.42   12.58
  -1  -5  -9   15.88    9.10
  -1  -5  -9    9.34    7.88
   1  -5   9   11.63    9.03
  -1  -5  -9   24.36   10.55
  -1  -5  -9   24.53   13.49
  -1   5 -10 1256.41   51.15
   1   5  10 1192.26   45.96
  -1   5 -10 1223.21   46.18
   1   5  10 1161.68   48.07
  -1   5 -10 1265.73   57.03
   1  -5  10 1237.95   48.23
   1  -5  10 1345.44   52.88
  -1  -5 -10 1373.11   53.13
  -1  -5 -10 1352.07   52.84
   1  -5  10 1292.49   48.08
  -1  -5 -10 1278.50   49.48
  -1  -5 -10 1457.63   61.30
  -1   5 -1137252.82  437.04
   1   5  1135750.89  426.47
  -1   5 -1135121.82  412.72
   1   5  1137193.63  442.61
  -1   5 -1135507.14  425.06
   1  -5  1136728.65  434.08
   1  -5  1134591.70  417.76
  -1  -5 -1136285.46  430.41
  -1  -5 -1137496.94  446.39
   1  -5  1136774.84  434.21
  -1  -5 -1136003.78  428.80
  -1  -5 -1136257.27  440.52
  -1   5 -12  388.47   48.24
  -1   5 -12  407.87   20.52
   1   5  12  443.92   44.92
  -1   5 -12  374.60   22.25
   1  -5  12  448.62   23.24
  -1  -5 -12  421.11   53.67
   1  -5  12  405.93   22.98
  -1  -5 -12  374.08   54.27
  -1  -5 -12  405.85   47.87
   1  -5  12  421.04   20.71
  -1  -5 -12  426.76   40.49
  -1   5 -13   61.94   14.83
  -1   5 -13   49.98   13.14
   1   5  13   63.13   15.28
   1   5  13   70.13    8.75
  -1   5 -13   29.91   11.08
   1  -5  13   67.34   10.44
   1  -5  13   63.20   16.54
  -1  -5 -13   46.95    8.93
  -1  -5 -13   36.04    8.11
   1  -5  13   49.92   11.17
  -1  -5 -13   89.02   13.58
  -1  -5 -13   59.71   14.48
  -1   5 -14   28.84    9.32
  -1   5 -14   42.28    7.00
   1   5  14   33.17   10.93
   1   5  14   33.23   12.34
  -1   5 -14   61.01   15.81
   1  -5  14   40.60    8.35
  -1  -5 -14   39.20   10.62
  -1  -5 -14   40.40   12.44
  -1  -5 -14   17.85    7.94
   1  -5  14   51.64    9.82
  -1  -5 -14   25.69    9.13
   1  -5  14   22.00   13.48
   1   5  15  179.54   30.20
  -1   5 -15  181.13   19.09
   1   5  15  201.06   33.31
  -1   5 -15  211.42   29.50
  -1   5 -15  207.05   31.16
   1  -5  15  236.86   31.03
   1  -5  15  196.53   26.46
  -1  -5 -15  241.18   33.77
  -1  -5 -15  202.54   35.79
  -1   5 -16 2501.52   97.07
   1   5  16 2662.61  103.44
  -1   5 -16 2428.90   96.58
   1   5  16 2353.60   90.47
   1  -5  16 2650.10  101.38
  -1  -5 -16 2648.19  102.27
   1  -5  16 2510.69   95.56
  -1  -5 -16 2573.19  140.02
  -1   5 -17  709.99   54.86
   1   5  17  911.89   88.17
  -1   5 -17  696.49   56.98
  -1  -5 -17  847.23   66.18
   1  -5  17  859.88   58.22
  -1  -5 -17  835.79   68.04
  -1   5 -18   54.10   15.78
   1   5  18   33.25    9.93
  -1   5 -18  104.67   23.20
  -1  -5 -18   49.06   24.83
   1  -5  18   29.37    7.43
   1  -5  18   37.20   10.41
  -1  -5 -18   66.70   14.05
  -1   5 -1912761.42  353.75
   1   5  1913232.49  370.67
  -1   5 -1912960.20  368.00
  -1  -5 -1913558.11  388.13
   1  -5  1912676.24  356.73
  -1  -5 -1913873.05  385.98
   1  -5  1912027.69  333.42
   1   5  20 1737.69  110.60
  -1   5 -20 1466.49  110.66
  -1   5 -20 1539.52   88.03
   1  -5  20 1441.27   74.86
   1   5  21  658.76   85.36
  -1   5 -21  626.96   85.89
  -1   5 -21  609.24   62.33
   1  -5  21  649.39   59.38
  -1  -5 -21  681.98   89.12
  -1  -5 -21  549.26   92.34
   1   5  22  412.09   64.91
  -1   5 -22  434.39   45.90
  -1   5 -22  364.62   65.74
   1  -5  22  400.42   61.94
  -1  -5 -22  475.13   50.76
  -1  -5 -22  353.31   57.59
   1   5  23 1509.71   61.72
  -1   5 -23 1400.87  124.59
  -1   5 -23 1488.67   48.52
   1  -5  23 1654.20   55.49
  -1  -5 -23 1465.65  134.75
  -1  -5 -23 1536.06   59.19
  -1   5 -24   80.20   18.20
   1   5  24   89.01   15.89
  -1   5 -24   82.56   21.34
  -1  -5 -24   85.04   19.50
   1  -5  24   66.45   18.20
  -1  -5 -24  121.57   18.17
   1   5  25  885.76   31.65
  -1   5 -25  800.41   94.74
  -1   5 -25  851.43   28.63
   1  -5  25  808.77   67.21
  -1  -5 -25  946.89  105.77
  -1  -5 -25  848.43   64.42
   1   5  26   73.65   18.36
  -1   5 -26   44.33   21.93
  -1   5 -26   18.10   13.05
   1  -5  26   97.01   18.07
  -1  -5 -26   54.17   28.45
  -1  -5 -26   43.08   19.70
  -1   5 -27  258.57   75.25
   1   5  27  523.08  101.17
  -1   5 -27  391.42   90.56
  -1  -5 -27  429.77   82.87
   1  -5  27  477.58   91.46
  -1  -5 -27  391.11   55.57
   1   5  28  585.51   91.05
  -1   5 -28  303.35  171.37
   1  -5  28  642.25   68.74
  -1  -5 -28  463.03  109.59
  -1  -5 -28  394.23   94.52
  -1   5 -29   31.74   21.47
   1   5  29   -9.13   13.03
   1  -5  29   -3.95   11.86
  -1  -5 -29   34.76   17.31
   1   6 -29  140.40   30.65
  -1   6  29  117.94   25.87
  -1  -6  29  123.80   34.39
   1  -6 -29   97.84   23.85
   1   6 -28   14.91   15.07
  -1   6  28   29.52   13.61
  -1  -6  28   29.18   18.32
   1  -6 -28   17.84   12.32
   1  -6 -28   23.65   11.13
   1   6 -27  235.34   41.05
  -1   6  27  258.87   43.25
  -1  -6  27  224.79   48.37
   1  -6 -27  233.77   66.15
   1  -6 -27   88.51   30.62
   1   6 -26 1992.18  104.44
  -1   6  26 2013.78  117.51
  -1  -6  26 2003.27  107.23
   1  -6 -26 1825.31  124.05
   1  -6 -26 1939.58  102.53
   1   6 -25  771.09  129.86
  -1   6  25  983.32   37.12
  -1  -6  25  993.83   92.33
   1  -6 -25 1047.25   54.10
   1  -6 -25  884.38   70.39
   1   6 -24 1028.51  167.34
  -1   6  24 1131.72   38.12
  -1  -6  24 1142.34   74.60
   1  -6 -24 1334.45   62.54
   1  -6 -24 1081.28   32.42
   1   6 -23  401.75   41.87
  -1   6  23  549.37   68.39
   1   6 -23  411.91   80.56
   1  -6 -23  457.03   84.19
  -1  -6  23  566.01   75.90
   1  -6 -23  416.56   65.34
   1   6 -22   14.28    6.89
  -1   6  22   26.20   17.71
   1   6 -22   57.41   15.92
   1  -6 -22   32.81   28.38
  -1  -6  22   23.10   10.68
   1  -6 -22   19.57   10.14
   1   6 -21  360.14   26.44
  -1   6  21  355.70   73.04
   1   6 -21  380.28   62.68
   1  -6 -21  403.22   59.28
  -1  -6  21  394.02   67.50
   1  -6 -21  394.51   37.72
   1   6 -20  293.92   39.55
  -1   6  20  408.55   66.87
   1   6 -20  327.26   58.55
   1  -6 -20  391.81   74.15
  -1  -6  20  418.83   61.14
   1  -6 -20  393.93   56.34
  -1  -6  20  174.95   44.22
   1   6 -19 3714.03  131.26
  -1   6  19 3595.51  131.59
   1   6 -19 3443.59  146.49
   1  -6 -19 3822.01  148.23
  -1  -6  19 3809.65  145.16
   1  -6 -19 3741.07  142.85
  -1  -6  19 3439.28  119.67
   1   6 -18   26.04   10.46
  -1   6  18   97.46   19.48
   1   6 -18   48.55   14.14
  -1   6  18   44.94   12.96
  -1  -6  18   69.86   13.99
  -1  -6  18   45.25   12.37
   1  -6 -18   83.04   15.41
   1  -6 -18  102.76   21.46
   1   6 -17  937.40   58.66
  -1   6  17  900.34   58.81
   1   6 -17  957.84   75.70
  -1   6  17  887.31   57.39
  -1  -6  17 1057.41   86.35
  -1  -6  17  862.44   55.20
   1  -6 -17  926.06   65.70
   1  -6 -17  772.13   73.85
   1   6 -16  221.02   32.24
  -1   6  16  218.09   29.53
   1   6 -16  159.91   26.36
  -1   6  16  157.82   26.02
  -1  -6  16  269.68   43.19
  -1  -6  16  190.89   26.60
   1  -6 -16  193.54   30.33
   1  -6 -16  209.30   38.28
   1   6 -15   33.63    6.08
  -1   6  15   37.66   11.02
   1   6 -15   63.56   13.96
  -1   6  15   36.39    8.46
  -1  -6  15   20.41    9.07
  -1  -6  15   42.62    6.57
   1  -6 -15   23.13    9.86
   1  -6 -15   46.79   11.92
  -1   6  14 6088.70   71.97
   1   6 -14 5867.85  177.39
  -1   6  14 6254.66  135.87
   1  -6 -14 6387.87  140.79
   1  -6 -14 6505.54  160.61
   1   6 -13   25.96    6.69
   1   6 -13   26.73    7.66
  -1   6  13   18.53    5.60
  -1   6  13   29.81    8.15
   1   6 -13    6.34    9.35
  -1  -6  13   21.69    8.29
  -1  -6  13   12.45    9.98
   1  -6 -13   16.93    6.03
   1  -6 -13   25.48   13.85
  -1  -6  13   34.33    8.39
   1  -6 -13   44.81    8.40
   1  -6 -13   36.31   12.52
   1   6 -12 4057.27   95.92
   1   6 -12 3720.80   89.03
  -1   6  12 3842.89   92.47
  -1   6  12 4145.67   99.94
   1   6 -12 3912.75   99.18
  -1  -6  12 4148.32  100.34
  -1  -6  12 3802.59   95.25
   1  -6 -12 4069.24  101.85
   1  -6 -12 3844.56   95.64
  -1  -6  12 3994.74   93.56
   1  -6 -12 3928.15   94.99
   1  -6 -12 3913.96  100.98
   1   6 -11 2717.92   64.93
   1   6 -11 2635.21   65.79
  -1   6  11 2587.95   79.04
  -1   6  11 2827.32   71.71
   1   6 -11 2630.25  410.56
  -1  -6  11 2576.02   78.92
  -1  -6  11 2661.23   77.14
   1  -6 -11 2750.46   73.24
   1  -6 -11 2696.15   70.01
  -1  -6  11 2671.31   64.92
   1  -6 -11 2674.29   72.85
   1  -6 -11 2893.91   95.91
   1   6 -10 3386.36   79.65
   1   6 -10 3249.67   78.77
  -1   6  10 3273.87   87.84
  -1   6  10 3398.35   88.54
   1   6 -10 3361.27   97.59
  -1  -6  10 3364.04   85.58
  -1  -6  10 3417.51   86.54
   1  -6 -10 3385.71   83.94
   1  -6 -10 3280.80   83.74
  -1  -6  10 3312.26   78.15
   1  -6 -10 3321.62   82.81
   1  -6 -10 3485.02  105.01
  -1   6   9  255.27   17.67
   1   6  -9  299.30   34.16
  -1   6   9  255.06   28.75
  -1   6   9  240.48   18.53
   1   6  -9  250.63   12.44
   1   6  -9  341.14   49.06
   1  -6  -9  247.18   29.17
   1  -6  -9  296.00   39.08
  -1  -6   9  285.57   24.64
  -1  -6   9  269.30   16.69
   1  -6  -9  274.71   20.92
  -1  -6   9  226.95   15.51
   1   6  -8  148.26   20.23
   1   6  -8  156.45   18.88
  -1   6   8  197.57   31.79
  -1   6   8  178.04   27.49
   1   6  -8  175.96   33.03
  -1   6   8  127.59   22.33
  -1  -6   8  124.48   15.73
   1  -6  -8  217.02   26.38
   1  -6  -8  145.83   17.02
  -1  -6   8  135.28   12.97
   1  -6  -8  181.52   26.32
  -1  -6   8  188.12   33.57
  -1   6   7 1452.15   59.36
   1   6  -7 1374.11   49.48
  -1   6   7 1502.82   55.80
  -1   6   7 1371.72   51.65
   1   6  -7 1517.52   54.97
   1   6  -7 1405.44   55.26
   1  -6  -7 1428.11   53.01
   1  -6  -7 1475.63   53.42
  -1  -6   7 1284.88   52.94
  -1  -6   7 1449.86   51.72
   1  -6  -7 1296.07   49.34
  -1  -6   7 1481.20   55.94
  -1   6   6 2624.67   71.19
   1   6  -6 2642.38   69.91
  -1   6   6 2813.54   74.78
  -1   6   6 2781.19   86.58
   1   6  -6 2666.21   69.25
   1   6  -6 2794.37   85.98
   1  -6  -6 2799.96   75.17
   1  -6  -6 2806.86   74.02
  -1  -6   6 2666.98   70.88
  -1  -6   6 2793.04   72.41
   1  -6  -6 2663.28   74.62
  -1  -6   6 2692.14   74.00
  -1   6   5 4944.54  102.44
   1   6  -5 4443.86   90.55
  -1   6   5 4419.84   89.78
  -1   6   5 4241.81   89.26
   1   6  -5 4526.55  104.06
   1  -6  -5 4541.84   92.27
   1  -6  -5 4554.93   94.86
  -1  -6   5 4454.09   94.29
  -1  -6   5 4378.78   88.57
  -1  -6   5 4356.28   92.22
   1  -6  -5 4635.63   97.61
  -1  -6   5 4646.39   96.95
   1   6  -4 1946.95   51.98
  -1   6   4 2009.36   53.01
  -1   6   4 1910.85   52.90
   1   6  -4 2000.82   57.58
   1   6  -4 1906.17   53.56
  -1   6   4 1938.73   54.05
   1  -6  -4 2014.74   55.76
  -1  -6   4 1908.21   53.25
  -1  -6   4 1932.96   50.99
   1  -6  -4 1996.61   55.60
  -1  -6   4 1909.83   52.13
   1  -6  -4 1993.71   53.07
   1   6  -3 9442.06  149.01
  -1   6   3 9814.35  153.40
  -1   6   3 9642.51  155.42
   1   6  -3 9720.57  155.42
  -1   6   3 9543.78  154.39
   1   6  -3 9978.66  161.70
   1  -6  -3 9976.19  160.55
  -1  -6   310114.31  166.79
  -1  -6   3 9608.20  151.45
   1  -6  -3 9967.87  161.20
  -1  -6   3 9679.34  155.23
   1  -6  -3 9866.33  154.78
  -1   6   2   90.71    6.25
   1   6  -2   99.03   14.52
   1   6  -2  118.01   18.43
  -1   6   2  144.25   26.67
  -1   6   2  129.07   19.69
   1   6  -2  115.27   22.19
   1  -6  -2  128.05   22.08
  -1  -6   2  110.38   15.81
   1  -6  -2  106.62   18.49
  -1  -6   2  119.59   18.53
   1  -6  -2  100.56    9.51
  -1  -6   2  103.29   10.65
  -1   6   1 3002.04   75.73
   1   6  -1 3069.19   82.02
   1   6  -1 2930.28   79.12
   1   6  -1 3098.88   81.21
  -1   6   1 3052.77   81.02
   1  -6  -1 3070.66   77.68
   1  -6  -1 3109.50   82.10
  -1  -6   1 2918.31   75.88
   1  -6  -1 2746.53   71.96
   1  -6  -1 3048.33   83.66
  -1  -6   1 3079.65   81.25
  -1  -6   1 2960.94   78.60
   1   6   0 5414.39  110.52
   1   6   0 5548.60  113.64
   1   6   0 5595.50  114.97
  -1   6   0 5551.10  115.42
   1  -6   0 5395.01  105.66
   1  -6   0 5525.70  112.52
  -1  -6   0 5475.03  111.37
   1  -6   0 5472.21  110.66
  -1  -6   0 5341.48  109.30
  -1  -6   0 5440.31  111.13
   1  -6   0 5464.82  112.51
  -1   6  -144580.79  372.94
   1   6   142764.29  365.56
  -1   6  -143636.56  375.64
  -1   6  -145211.48  388.29
   1   6   144847.09  386.94
  -1  -6  -144197.78  380.45
   1  -6   143602.89  374.84
  -1  -6  -142855.02  368.40
  -1  -6  -142722.81  368.77
   1  -6   143620.46  378.29
  -1   6  -2 3098.37   78.06
   1   6   2 3479.72   72.06
   1   6   2 3053.86   80.64
  -1   6  -2 3081.23   78.74
   1   6   2 3197.38   90.02
  -1   6  -2 3225.80   94.21
  -1   6  -2 3281.51   86.80
  -1  -6  -2 3071.56   80.87
  -1  -6  -2 3221.12   84.02
   1  -6   2 3039.96   79.23
   1  -6   2 3159.82   83.01
  -1  -6  -2 3144.12   84.03
   1   6   3 1608.71   49.17
  -1   6  -3 1569.87   41.83
   1   6   3 1642.62   46.83
  -1   6  -3 1613.99   46.41
  -1   6  -3 1670.07   46.01
   1  -6   3 1638.22   42.41
  -1  -6  -3 1718.72   48.35
  -1  -6  -3 1601.53   44.14
   1  -6   3 1700.83   46.40
  -1  -6  -3 1703.06   52.00
   1  -6   3 1604.80   45.08
   1   6   4 1732.27   51.71
  -1   6  -4 1662.20   45.73
   1   6   4 1597.96   45.62
  -1   6  -4 1688.16   46.85
  -1   6  -4 1643.60   48.85
   1  -6   4 1656.10   44.30
  -1  -6  -4 1637.17   45.65
  -1  -6  -4 1555.65   43.50
   1  -6   4 1708.99   46.83
  -1  -6  -4 1375.94   40.39
   1  -6   4 1657.16   47.28
   1   6   5  292.03   27.30
  -1   6  -5  236.02   13.13
   1   6   5  311.75   36.72
  -1   6  -5  227.03   14.21
  -1   6  -5  277.22   34.87
   1   6   5  235.16   15.17
  -1  -6  -5  249.86   22.36
  -1  -6  -5  222.84   14.56
   1  -6   5  232.92   14.92
   1  -6   5  231.63   20.25
   1  -6   5  247.34   13.30
  -1  -6  -5  203.90   16.46
  -1   6  -6 4640.33   99.93
  -1   6  -6 4635.60   95.38
   1   6   6 4373.56   91.99
  -1   6  -6 4373.64   97.54
   1   6   6 4395.55   93.33
   1   6   6 4300.14   91.06
   1  -6   6 4299.31   91.48
  -1  -6  -6 4452.83   93.24
   1  -6   6 4283.85   88.36
   1  -6   6 4652.31   95.25
  -1  -6  -6 4310.98   94.09
  -1  -6  -6 4623.02   96.55
   1   6   7  833.01   34.86
  -1   6  -7  857.71   33.01
   1   6   7  909.41   46.09
   1   6   7  858.65   35.31
  -1   6  -7  914.43   36.29
  -1   6  -7  918.30   37.72
  -1  -6  -7  831.18   32.80
   1  -6   7  853.66   34.59
   1  -6   7  878.33   33.01
   1  -6   7  852.69   32.93
  -1  -6  -7  842.67   39.17
  -1  -6  -7  787.14   40.70
   1   6   8 2236.84   67.58
  -1   6  -8 2199.62   60.43
   1   6   8 2350.91   66.44
   1   6   8 2325.43   65.81
  -1   6  -8 2181.32   67.01
  -1   6  -8 2222.92   66.30
  -1  -6  -8 2082.82   59.63
  -1  -6  -8 2139.35   61.32
   1  -6   8 2282.59   69.94
   1  -6   8 2244.38   61.80
  -1  -6  -8 2152.75   62.13
   1  -6   8 2218.39   64.11
   1   6   927751.56  305.91
   1   6   927244.91  297.36
  -1   6  -927733.41  301.85
  -1   6  -928257.73  314.50
   1   6   928131.94  310.07
  -1   6  -927317.16  308.40
   1  -6   928726.44  311.95
  -1  -6  -926919.48  300.58
   1  -6   927639.23  300.48
  -1  -6  -927636.07  304.89
   1  -6   927972.71  319.63
   1   6  10 1968.10   65.85
  -1   6 -10 2048.99   64.08
   1   6  10 2181.63   68.22
  -1   6 -10 2092.83   65.49
  -1   6 -10 2109.36   77.50
   1  -6  10 2000.86   63.83
  -1  -6 -10 2083.78   66.02
  -1  -6 -10 2034.65   63.56
   1  -6  10 2098.89   66.19
  -1  -6 -10 2143.10   75.07
   1  -6  10 2110.81   71.72
  -1   6 -11  281.00   22.21
   1   6  11  262.42   36.45
  -1   6 -11  310.18   31.79
   1   6  11  334.05   41.16
  -1   6 -11  289.31   48.25
   1  -6  11  272.73   24.95
   1  -6  11  277.09   42.57
  -1  -6 -11  304.37   28.48
  -1  -6 -11  231.33   31.52
   1  -6  11  242.79   13.44
  -1  -6 -11  210.32   33.73
  -1  -6 -11  337.11   43.57
  -1   6 -12 4982.07  144.92
  -1   6 -12 5210.16  121.89
   1   6  12 5394.00  127.61
  -1   6 -12 5367.31  125.52
   1   6  12 5393.00  128.56
   1  -6  12 5229.01  126.70
   1  -6  12 5461.68  128.79
  -1  -6 -12 5421.05  130.48
   1  -6  12 5321.44  124.08
  -1  -6 -12 5376.28  134.16
  -1  -6 -12 5169.98  141.36
   1   6  13 2773.91   93.61
   1   6  13 2809.83   98.71
  -1   6 -13 2665.89   89.24
  -1   6 -13 2556.64  108.27
  -1   6 -13 2576.26   85.37
  -1  -6 -13 2701.72  134.88
   1  -6  13 2513.29   96.01
   1  -6  13 2728.20   90.23
  -1  -6 -13 2685.85  108.49
   1  -6  13 2758.07   91.07
   1   6  14 2565.06   87.76
  -1   6 -14 2287.85   78.48
   1   6  14 2374.25   81.51
  -1   6 -14 2366.04   99.90
  -1   6 -14 2544.60   86.27
   1  -6  14 2425.45   88.53
   1  -6  14 2502.71   83.59
  -1  -6 -14 2497.51   86.56
  -1  -6 -14 2509.97  109.78
   1   6  15  352.86   49.56
   1   6  15  400.76   37.60
  -1   6 -15  356.69   49.23
  -1   6 -15  470.05   65.51
  -1   6 -15  429.84   86.55
   1  -6  15  489.91   48.36
   1  -6  15  416.38   23.85
  -1  -6 -15  428.54   48.44
  -1  -6 -15  520.27   73.14
  -1   6 -16 3151.05  100.16
   1   6  16 3247.12   99.29
  -1   6 -16 2919.86   99.80
  -1  -6 -16 3395.06  108.93
   1  -6  16 3098.43   93.47
   1  -6  16 3241.94   96.82
  -1  -6 -16 3048.50  105.67
  -1   6 -17 6228.21  172.37
   1   6  17 6489.67  187.03
  -1   6 -17 6014.60  171.89
  -1  -6 -17 6317.09  187.48
   1  -6  17 6142.71  182.95
  -1  -6 -17 6119.46  175.38
  -1   6 -18  177.21   21.59
   1   6  18  204.17   36.07
  -1   6 -18  125.53   27.84
  -1  -6 -18  169.84   24.03
   1  -6  18  159.10   27.64
  -1  -6 -18  156.89   31.14
   1  -6  18  112.54   21.22
  -1   6 -19  629.63   67.38
   1   6  19  508.76   82.30
  -1   6 -19  559.84   65.57
  -1  -6 -19  541.44   73.05
   1  -6  19  501.55   60.95
  -1  -6 -19  511.37   63.49
   1  -6  19  359.90   67.77
   1   6  20 4380.89  163.54
  -1   6 -20 3916.55  180.99
  -1   6 -20 4029.22  147.86
  -1  -6 -20 4396.65  170.40
  -1  -6 -20 4057.80  167.65
   1   6  21 5963.93  233.85
  -1   6 -21 5741.38  234.22
  -1   6 -21 6628.72  259.63
   1  -6  21 6628.06  260.84
  -1  -6 -21 6317.98  276.59
  -1  -6 -21 6909.95  284.65
  -1   6 -22  180.31   36.93
  -1   6 -22  108.30   30.66
   1  -6  22  165.91   27.90
  -1  -6 -22  228.32   31.03
  -1  -6 -22  186.15   28.00
  -1   6 -23   20.13   11.58
   1   6  23   13.61    8.09
  -1   6 -23   17.33   15.07
  -1  -6 -23   21.45   17.66
   1  -6  23   22.31    9.14
  -1  -6 -23   16.55    9.18
   1   6  24  203.77   48.92
  -1   6 -24   72.76   36.28
  -1   6 -24  144.50   33.09
   1  -6  24  212.74   28.84
  -1  -6 -24  234.85   41.73
  -1  -6 -24  157.01   35.83
  -1   6 -25  211.94   41.29
   1   6  25  284.82   40.47
  -1   6 -25  217.06   64.79
  -1  -6 -25  261.21   42.33
   1  -6  25  298.45   43.73
  -1  -6 -25  254.62   48.78
  -1   6 -26  187.58   47.42
   1   6  26  304.39   42.01
  -1   6 -26  227.93   53.34
  -1  -6 -26  284.17   43.44
   1  -6  26  266.48   44.82
  -1  -6 -26  193.01   31.93
  -1   6 -27 1241.50  100.63
   1   6  27 1395.36   79.32
  -1   6 -27 1365.92  119.18
  -1  -6 -27 1266.07  166.52
   1  -6  27 1454.76   80.62
  -1  -6 -27 1512.73   86.68
   1   6  28   -0.65   10.66
  -1   6 -28  -15.18   22.85
   1  -6  28    7.55    9.08
  -1  -6 -28   26.39   14.74
  -1  -6 -28   14.13   13.44
   1   7 -28   28.09   25.53
  -1   7  28   25.83    8.47
  -1  -7  28   35.57   12.20
   1  -7 -28   21.22   15.35
   1  -7 -28   12.75    9.03
   1   7 -27   21.89   20.19
  -1   7  27   11.98    9.46
  -1  -7  27   35.48   11.34
   1  -7 -27   60.46   29.43
   1   7 -26  581.78  132.43
  -1   7  26  709.10   86.63
  -1  -7  26  872.00   47.48
   1  -7 -26  803.99  115.82
   1   7 -25   19.41   17.49
  -1   7  25   10.48    9.33
  -1  -7  25   48.32   14.20
   1  -7 -25  -17.30   23.45
   1  -7 -25   -0.67   13.12
   1   7 -24  845.25   27.64
  -1   7  24  944.37   33.66
   1   7 -24  888.01   62.48
   1  -7 -24  900.21  133.53
  -1  -7  24  908.92   92.42
   1   7 -23   13.19    7.67
  -1   7  23    4.60   12.00
   1   7 -23   13.53   15.72
   1  -7 -23   34.19   16.70
  -1  -7  23   23.36   10.02
   1  -7 -23   13.17    9.65
   1   7 -22    2.76    4.62
  -1   7  22   18.36   11.60
   1   7 -22   39.95   23.90
   1  -7 -22   35.12   19.23
  -1  -7  22   11.85    8.21
   1  -7 -22    6.91    8.07
   1   7 -21  327.63   28.93
  -1   7  21  425.83   58.99
   1   7 -21  365.53   67.35
   1  -7 -21  449.12   61.88
  -1  -7  21  402.12   39.78
   1  -7 -21  410.28   44.55
   1   7 -20 2129.58  101.21
  -1   7  20 2073.17  101.48
   1   7 -20 2164.35  114.62
   1  -7 -20 2149.26  202.80
  -1  -7  20 2114.03  106.78
   1  -7 -20 2007.07  120.35
  -1  -7  20 1849.21   87.66
   1   7 -19  458.00   50.87
  -1   7  19  504.14   67.65
   1   7 -19  466.49   68.72
   1  -7 -19  494.83   75.51
  -1  -7  19  574.60   64.64
   1  -7 -19  571.82   62.85
  -1  -7  19  390.90   57.40
   1   7 -18   23.39   10.51
  -1   7  18   25.90    7.43
   1   7 -18   61.35   19.63
  -1   7  18    8.50    6.53
  -1  -7  18   17.99    9.43
  -1  -7  18   19.31    7.59
   1  -7 -18   17.76    7.08
   1  -7 -18   56.19   21.14
   1   7 -17 2859.39  120.71
  -1   7  17 3095.99  106.20
  -1   7  17 2956.68  114.24
   1   7 -17 3196.20  103.58
  -1  -7  17 3183.77  105.37
   1  -7 -17 3108.32  116.75
  -1  -7  17 3006.63  113.47
   1   7 -16 2021.42   76.97
  -1   7  16 1952.22   79.89
   1   7 -16 1764.45   85.97
  -1   7  16 2011.36   79.27
  -1  -7  16 1907.94   74.87
  -1  -7  16 1934.96   73.54
   1  -7 -16 2069.61   82.22
   1  -7 -16 1813.65  275.70
   1   7 -15  157.79   23.16
  -1   7  15  184.61   32.88
   1   7 -15  175.83   23.36
  -1   7  15  145.00   24.97
  -1  -7  15  250.39   31.66
  -1  -7  15  211.35   25.10
   1  -7 -15  180.30   28.82
   1  -7 -15  217.22   32.68
  -1   7  14   13.68    3.85
  -1   7  14   21.98    7.69
   1   7 -14   11.34    5.52
   1   7 -14   10.82   10.49
   1   7 -14   12.69    4.00
   1  -7 -14    9.61    6.27
   1  -7 -14    8.69   11.09
  -1  -7  14    2.65    3.24
   1  -7 -14   11.24    5.66
  -1  -7  14   25.95    8.63
   1   7 -13  152.31   23.75
  -1   7  13  159.29   27.54
   1   7 -13  147.71   20.94
  -1   7  13  171.81   28.54
   1   7 -13  201.91   26.32
  -1  -7  13  187.40   22.47
  -1  -7  13  176.54   30.41
   1  -7 -13  143.65   25.46
   1  -7 -13   83.42   18.16
  -1  -7  13  170.60   22.87
   1  -7 -13  158.52   24.17
   1  -7 -13  200.86   26.67
   1   7 -12  188.20   26.10
   1   7 -12  161.21   18.19
  -1   7  12  202.07   31.07
  -1   7  12  187.65   21.77
   1   7 -12  150.24   21.45
  -1  -7  12  235.61   28.71
  -1  -7  12  188.17   33.40
   1  -7 -12  176.85   24.58
   1  -7 -12  112.24   19.56
  -1  -7  12  170.03   13.83
   1  -7 -12  206.69   29.05
   1  -7 -12  250.39   41.28
  -1   7  11   72.06   12.61
   1   7 -11   63.18   13.47
  -1   7  11   70.96   13.52
   1   7 -11   74.39    9.76
   1   7 -11   73.40   12.02
  -1  -7  11   77.42   13.99
   1  -7 -11   40.98   11.74
   1  -7 -11   66.46   15.13
  -1  -7  11   64.71   14.92
   1  -7 -11   73.52   14.13
  -1  -7  11   68.90   12.79
  -1   7  10  674.78   31.08
   1   7 -10  702.32   40.84
  -1   7  10  710.47   28.53
  -1   7  10  839.23   56.40
   1   7 -10  691.97   30.17
   1   7 -10  757.87   35.13
   1  -7 -10  698.11   31.49
   1  -7 -10  726.99   39.90
  -1  -7  10  673.90   27.94
  -1  -7  10  746.90   34.91
   1  -7 -10  737.83   37.89
  -1  -7  10  760.77   61.13
  -1   7   9 5466.40  125.16
   1   7  -9 5652.14  113.66
  -1   7   9 5954.38  120.23
  -1   7   9 5817.97  120.34
   1   7  -9 5789.74  116.43
   1   7  -9 5717.69  120.48
   1  -7  -9 6046.94  126.68
   1  -7  -9 5857.14  118.59
  -1  -7   9 5796.43  118.00
  -1  -7   9 5403.86  107.42
   1  -7  -9 5852.99  123.41
  -1  -7   9 5886.70  123.07
  -1   7   8 3927.37  105.97
   1   7  -8 3924.94   86.68
  -1   7   8 4116.58   90.83
  -1   7   8 3845.02   87.81
   1   7  -8 4095.58   89.79
   1   7  -8 4248.55  100.71
   1  -7  -8 4071.51   92.26
   1  -7  -8 4130.06   91.79
  -1  -7   8 4030.69   94.16
  -1  -7   8 3931.22   86.53
   1  -7  -8 4093.96   92.21
  -1  -7   8 3997.62   92.31
  -1   7   7 2477.70   70.24
   1   7  -7 2434.53   66.92
  -1   7   7 2580.04   70.44
  -1   7   7 2450.51   78.77
   1   7  -7 2559.25   68.10
   1   7  -7 2516.53   75.53
   1  -7  -7 2570.77   71.40
   1  -7  -7 2555.05   69.22
  -1  -7   7 2516.77   70.27
  -1  -7   7 2493.53   66.51
   1  -7  -7 2614.44   84.02
  -1  -7   7 2512.50   74.04
   1   7  -6   23.03    8.73
  -1   7   6   22.94   10.64
  -1   7   6   14.76    7.31
   1   7  -6   16.91   10.56
  -1   7   6   -3.91   10.72
   1  -7  -6    9.65    9.82
  -1  -7   6   -5.54   11.18
   1  -7  -6   12.58    5.88
  -1  -7   6    2.43    6.70
   1  -7  -6   15.40    8.50
  -1  -7   6   10.08    6.08
  -1  -7   6   21.72    7.18
   1   7  -5 2779.70   73.02
  -1   7   5 2781.72   75.44
   1   7  -5 2794.39   80.35
   1   7  -5 2894.24   79.35
  -1   7   5 2798.42   87.63
  -1   7   5 2761.15   74.93
   1  -7  -5 2768.80   74.91
  -1  -7   5 2865.12   78.29
  -1  -7   5 2705.91   70.62
   1  -7  -5 2793.13   75.26
  -1  -7   5 2758.18   73.76
   1  -7  -5 2920.55   81.22
   1   7  -4 7101.90   34.99
  -1   7   4 7407.92  117.58
   1   7  -4 7381.26  125.81
   1   7  -4 7441.24  121.94
  -1   7   4 6953.94   46.06
  -1   7   4 7306.04  120.99
   1  -7  -4 7600.44  124.71
  -1  -7   4 7262.41  120.92
  -1  -7   4 7285.64  118.62
  -1  -7   4 7234.71  119.43
   1  -7  -4 7339.01  117.37
   1  -7  -4 6716.99  139.24
   1   7  -3 3894.37   79.98
  -1   7   3 3943.97   79.83
  -1   7   3 4013.36   85.87
   1   7  -3 3988.39   84.66
  -1   7   3 4189.37   90.47
   1   7  -3 4119.37   89.41
   1  -7  -3 4098.54   86.13
  -1  -7   3 3885.78   82.47
  -1  -7   3 3879.76   79.22
   1  -7  -3 4056.91   86.12
  -1  -7   3 4028.78   83.89
   1  -7  -3 3892.45   78.43
  -1   7   2  944.05   32.75
   1   7  -2  920.54   35.17
  -1   7   2 1006.28   47.01
   1   7  -2  964.86   41.22
  -1   7   2  955.78   39.29
   1   7  -2  998.41   43.00
   1  -7  -2  987.86   34.59
  -1  -7   2  868.03   33.21
  -1  -7   2 1003.74   43.48
   1  -7  -2  981.87   37.87
   1  -7  -2 1050.36   46.93
  -1  -7   2  980.04   36.53
  -1   7   1 3289.48   83.22
   1   7  -1 3157.65   86.46
   1   7  -1 3243.95   85.86
  -1   7   1 3334.21   88.44
   1   7  -1 3222.06   85.21
   1  -7  -1 3148.91   83.17
   1  -7  -1 3317.93   84.26
  -1  -7   1 3112.79   81.39
   1  -7  -1 3171.01   83.14
  -1  -7   1 3084.55   81.76
  -1  -7   1 3471.82   74.36
  -1   7   010365.72  160.53
   1   7   010892.88  175.00
  -1   7   010957.83  177.94
   1   7   011014.64  176.19
   1   7   010780.51  173.26
  -1  -7   010796.59  171.71
   1  -7   010445.74  167.88
  -1  -7   010674.79  170.59
   1  -7   010547.74  167.42
  -1  -7   010473.74  168.56
   1  -7   010688.02  165.62
   1  -7   011232.37  181.86
  -1   7  -1 1544.42   39.41
   1   7   1 1459.82   42.32
  -1   7  -1 1549.29   40.24
   1   7   1 1575.77   45.15
  -1   7  -1 1602.40   46.13
   1   7   1 1490.71   42.76
  -1   7  -1 1540.36   45.51
  -1  -7  -1 1476.80   45.77
  -1  -7  -1 1443.77   40.81
   1  -7   1 1497.77   41.58
  -1  -7  -1 1548.37   47.58
   1  -7   1 1510.26   43.63
  -1   7  -2 5795.68  113.72
   1   7   2 5624.02  114.12
   1   7   2 5714.95  117.80
  -1   7  -2 5756.63  114.45
   1   7   2 5673.97  117.07
  -1   7  -2 5886.45  120.10
  -1   7  -2 5580.61  119.79
   1  -7   2 5639.01  115.68
   1  -7   2 5529.05  112.37
  -1  -7  -2 5498.46  112.50
  -1  -7  -2 5576.52  122.13
  -1  -7  -2 5868.53  118.84
   1   7   318159.28  166.49
  -1   7  -317321.57  149.18
   1   7   318406.01  172.17
   1   7   318157.73  168.36
  -1   7  -318326.59  169.06
  -1   7  -317799.45  167.00
  -1  -7  -317824.29  163.02
   1  -7   317233.51  158.62
   1  -7   317480.16  150.94
   1  -7   318116.21  163.08
  -1  -7  -317416.29  160.36
  -1  -7  -317195.21  155.77
  -1   7  -4  343.90   20.74
  -1   7  -4  330.94   19.16
   1   7   4  308.21   17.94
   1   7   4  311.15   18.25
  -1   7  -4  315.96   19.55
   1   7   4  276.92   21.81
   1  -7   4  336.44   18.11
  -1  -7  -4  308.51   17.04
  -1  -7  -4  290.05   23.15
   1  -7   4  328.91   18.88
  -1  -7  -4  327.86   20.09
   1  -7   4  354.98   20.22
   1   7   5  257.81   29.94
  -1   7  -5  216.39   13.43
   1   7   5  184.88   14.09
  -1   7  -5  231.02   17.67
  -1   7  -5  218.50   15.92
   1   7   5  205.61   17.78
  -1  -7  -5  231.64   30.59
  -1  -7  -5  254.02   34.44
   1  -7   5  227.63   17.04
   1  -7   5  214.35   13.03
   1  -7   5  211.14   12.22
  -1  -7  -5  222.66   18.30
   1   7   6 5957.14  129.85
  -1   7  -6 6103.23  128.89
   1   7   6 5984.03  129.28
   1   7   6 5938.35  130.00
  -1   7  -6 5387.70  116.93
  -1   7  -6 5763.52  139.37
  -1  -7  -6 5760.68  125.16
  -1  -7  -6 5940.84  128.82
   1  -7   6 6138.60  131.39
   1  -7   6 5858.80  127.77
  -1  -7  -6 6230.40  137.98
   1  -7   6 6088.97  132.72
   1   7   712541.87  250.51
  -1   7  -712698.60  251.65
   1   7   712823.16  255.16
  -1   7  -712702.95  256.60
  -1   7  -712268.15  243.14
   1   7   712365.53  247.79
   1  -7   711970.36  243.00
  -1  -7  -712719.83  253.85
   1  -7   712924.81  254.04
   1  -7   711842.21  235.07
  -1  -7  -712125.38  243.58
  -1  -7  -712562.77  252.35
   1   7   8 1736.93   71.17
  -1   7  -8 1760.51   62.74
   1   7   8 1697.77   62.85
   1   7   8 1858.91   64.20
  -1   7  -8 1771.26   67.03
  -1   7  -8 1796.05   67.99
  -1  -7  -8 1598.48   67.08
   1  -7   8 1791.76   69.73
   1  -7   8 1820.30   68.14
   1  -7   8 1743.57   65.66
  -1  -7  -8 1704.85   71.82
  -1  -7  -8 1647.82   62.09
   1   7   9 1044.26   39.52
  -1   7  -9 1056.50   37.90
   1   7   9 1069.96   41.03
   1   7   9 1062.60   40.26
  -1   7  -9 1140.76   52.88
  -1   7  -9 1063.95   45.67
  -1  -7  -9 1167.87   63.99
  -1  -7  -9 1015.95   37.66
   1  -7   9 1084.98   46.79
   1  -7   9 1089.52   39.59
  -1  -7  -9  998.67   38.29
   1  -7   9 1146.60   65.45
   1   7  1011542.85  148.35
  -1   7 -1011734.99  145.25
   1   7  1011301.06  142.88
   1   7  1011695.69  150.27
  -1   7 -1012030.09  151.30
  -1   7 -1011872.31  158.16
  -1  -7 -1012006.14  154.08
  -1  -7 -1011470.77  144.53
   1  -7  1012269.98  151.39
   1  -7  1011480.62  145.27
  -1  -7 -1011765.13  151.62
   1  -7  1011564.64  150.36
   1   7  11 5430.98  130.06
  -1   7 -11 5504.00  127.94
   1   7  11 5267.55  133.72
   1   7  11 5648.65  135.08
  -1   7 -11 5692.17  142.19
  -1   7 -11 5694.17  137.27
  -1  -7 -11 5514.89  133.83
  -1  -7 -11 5495.95  130.26
   1  -7  11 5493.19  128.33
   1  -7  11 5329.65  124.40
  -1  -7 -11 5319.09  127.03
   1  -7  11 5313.03  128.06
  -1   7 -12  184.90   22.52
  -1   7 -12  186.92   20.96
   1   7  12  199.65   29.21
   1   7  12  169.18   28.69
  -1   7 -12  188.96   27.70
   1  -7  12  242.12   27.43
   1  -7  12  208.20   30.74
  -1  -7 -12  163.95   16.43
  -1  -7 -12  149.85   17.91
   1  -7  12  167.02    8.71
  -1  -7 -12  176.41   27.14
  -1  -7 -12  248.05   30.53
  -1   7 -13   59.69   10.37
   1   7  13   60.83   14.42
  -1   7 -13   67.17   10.74
   1   7  13   43.69    7.95
  -1   7 -13  104.76   20.64
   1  -7  13   41.43    7.00
   1  -7  13   43.58   17.07
  -1  -7 -13   18.42    7.95
  -1  -7 -13   25.85    8.84
   1  -7  13   48.22    7.12
  -1  -7 -13   45.83    9.25
  -1  -7 -13   51.24   17.77
   1   7  14 1027.18   48.44
   1   7  14 1122.47   50.44
  -1   7 -14  934.42   41.43
  -1   7 -14  966.46   53.91
  -1   7 -14 1085.87   51.96
   1  -7  14 1068.04   55.65
   1  -7  14  998.38   46.94
  -1  -7 -14 1021.51   47.61
  -1  -7 -14 1039.21   52.55
  -1   7 -15 3473.88  105.01
   1   7  15 3549.48  106.37
  -1   7 -15 3557.74  109.28
  -1  -7 -15 3482.41  130.31
   1  -7  15 3488.15  103.29
   1  -7  15 3322.87  104.64
  -1  -7 -15 3540.39  120.84
  -1   7 -16   -0.21   10.80
   1   7  16   26.82   10.47
  -1   7 -16   16.63   11.54
  -1  -7 -16   35.08   15.71
   1  -7  16    2.59    6.13
   1  -7  16   23.87   13.43
  -1  -7 -16   31.34   12.55
  -1   7 -17 2993.45  113.73
   1   7  17 2953.81  114.55
  -1   7 -17 2857.11  147.85
  -1  -7 -17 2926.63  136.85
   1  -7  17 2992.87  122.74
   1  -7  17 2735.44  110.24
  -1  -7 -17 2911.11  113.82
  -1   7 -18   39.30   13.05
   1   7  18   40.06   12.76
  -1   7 -18   28.65   14.60
  -1  -7 -18   62.90   20.62
   1  -7  18   13.21    8.09
  -1  -7 -18   52.30   19.24
   1  -7  18   36.20    9.46
  -1   7 -19 6161.41  205.83
   1   7  19 6543.18  216.85
  -1   7 -19 6189.57  212.29
  -1  -7 -19 6129.13  256.93
   1  -7  19 6243.72  208.00
  -1  -7 -19 6337.83  212.41
   1  -7  19 5203.56  171.03
  -1   7 -20   81.91   28.84
  -1   7 -20   93.72   24.27
   1  -7  20  140.46   23.40
  -1  -7 -20  110.65   52.43
  -1  -7 -20  139.08   29.59
  -1   7 -21  357.19   57.41
   1   7  21  400.79   65.34
  -1   7 -21  323.68   54.86
  -1  -7 -21  436.81   61.86
   1  -7  21  405.21   43.01
  -1  -7 -21  361.53   65.64
  -1   7 -22 1304.87   42.14
   1   7  22 1284.45   53.95
  -1   7 -22 1484.28  131.18
  -1  -7 -22 1291.69  121.28
   1  -7  22 1308.69   74.00
  -1  -7 -22 1233.41  104.27
   1   7  23 1084.68   65.37
  -1   7 -23 1133.34  106.90
  -1   7 -23 1090.04   46.28
   1  -7  23 1208.52   87.20
  -1  -7 -23 1203.08   84.70
  -1  -7 -23 1168.22   37.20
  -1   7 -24  202.16   53.52
   1   7  24  302.65   45.65
  -1   7 -24  370.06  149.70
  -1  -7 -24  303.11   54.51
   1  -7  24  263.09   57.06
  -1  -7 -24  302.70   53.36
   1   7  25  540.65   88.22
  -1   7 -25  460.09  125.43
  -1   7 -25  419.79   76.10
   1  -7  25  598.34   48.27
  -1  -7 -25  552.80  107.76
  -1  -7 -25  443.30   73.79
   1   7  26 1085.44  128.66
  -1   7 -26 1125.64  100.09
  -1   7 -26 1071.38   77.06
   1  -7  26 1168.16   88.75
  -1  -7 -26  940.47  171.77
  -1  -7 -26 1258.92   89.65
   1   7  27 3245.88  137.61
  -1   7 -27 3106.79  157.62
   1  -7  27 3044.01  131.67
  -1  -7 -27 3228.22  147.01
  -1  -7 -27 3114.97  135.70
  -1   7 -28   11.39   17.26
   1   7  28   65.08   26.23
   1  -7  28    9.58   16.36
  -1  -7 -28   62.83   31.26
   1   8 -28   86.34   26.30
  -1   8  28   62.08   19.43
  -1  -8  28   58.80   18.85
   1  -8 -28   89.60   25.10
   1   8 -27  679.36  128.48
  -1   8  27  887.46   82.92
  -1  -8  27  927.33   88.93
   1  -8 -27  768.29  115.81
   1  -8 -27  651.36  102.04
   1   8 -26  334.10   79.85
  -1   8  26  329.92   81.64
  -1  -8  26  367.04   71.49
   1  -8 -26  443.82   80.43
   1  -8 -26  194.92   71.04
   1   8 -25  259.71   48.55
  -1   8  25  322.86   56.18
  -1  -8  25  315.33  132.18
   1  -8 -25  403.71   69.77
   1  -8 -25  260.16   50.00
   1   8 -24   10.80    8.70
  -1   8  24    1.57   11.05
   1   8 -24   31.81   19.00
   1  -8 -24   -3.25   24.17
  -1  -8  24   36.09   16.29
   1   8 -23  459.86   15.32
  -1   8  23  604.46   72.46
   1   8 -23  462.14   82.36
   1  -8 -23  524.87   59.62
  -1  -8  23  519.14   83.20
   1  -8 -23  293.61   72.18
   1   8 -22    4.44    3.07
  -1   8  22   -2.45   12.23
   1   8 -22   23.89   18.72
   1  -8 -22   13.67   15.46
  -1  -8  22   -3.52   10.46
   1  -8 -22   10.44   14.00
   1   8 -21 1464.65   78.29
  -1   8  21 1491.87   84.14
   1   8 -21 1362.45  145.27
   1  -8 -21 1577.66  161.83
  -1  -8  21 1731.15   94.87
   1  -8 -21 1523.08  130.97
   1   8 -20  163.46   34.34
  -1   8  20  265.62   43.99
   1   8 -20  227.64   35.52
   1  -8 -20  224.59   43.15
  -1  -8  20  270.18   39.22
   1  -8 -20  212.89   33.91
  -1  -8  20  123.18   28.93
   1   8 -19   56.70   12.79
  -1   8  19   81.87   16.62
   1   8 -19   70.25   24.73
   1  -8 -19   53.79   24.15
  -1  -8  19   16.37    9.04
  -1  -8  19   42.26    9.07
   1  -8 -19   82.71   21.56
   1   8 -18 2546.53   86.73
  -1   8  18 2641.81   94.62
   1   8 -18 2556.94  124.25
   1  -8 -18 2687.43  103.31
  -1  -8  18 2723.50  106.43
  -1  -8  18 2435.71  101.29
   1  -8 -18 2750.05  100.23
   1   8 -17   23.75    7.53
  -1   8  17   21.09    8.10
   1   8 -17   24.68   11.59
   1  -8 -17   67.16   22.29
  -1  -8  17   18.16    7.83
  -1  -8  17   17.65    8.40
   1  -8 -17   52.46   11.72
   1   8 -16  232.42   36.16
  -1   8  16  299.89   44.10
   1   8 -16  283.49   44.36
  -1   8  16  171.87   40.06
  -1  -8  16  346.11   50.29
  -1  -8  16  249.70   36.94
   1  -8 -16  296.49   50.60
   1  -8 -16  235.72   59.45
   1   8 -15 2846.03  419.25
  -1   8  15 2651.42  103.24
   1   8 -15 2298.33  109.08
  -1   8  15 2854.13  422.13
  -1  -8  15 2793.14  413.02
  -1  -8  15 2778.06  409.31
   1  -8 -15 2876.12   89.98
   1  -8 -15 2878.80  101.14
  -1   8  14 1701.38   63.33
  -1   8  14 1577.08   66.66
   1   8 -14 1531.46   63.61
   1   8 -14 1541.00   72.74
   1   8 -14 1613.47  304.76
  -1  -8  14 1871.46   90.88
  -1  -8  14 1617.20  305.53
   1  -8 -14 1592.39   69.64
   1  -8 -14 1665.37   74.65
  -1   8  13  231.86   33.68
   1   8 -13  208.73   21.55
  -1   8  13  235.87   31.66
   1   8 -13  207.25   28.10
   1   8 -13  231.90   18.82
   1  -8 -13  185.94   28.76
   1  -8 -13  251.12   29.36
  -1  -8  13  254.97   30.44
   1  -8 -13  240.44   37.72
  -1  -8  13  232.91   35.06
  -1   8  12 1193.84   48.60
   1   8 -12 1122.49   47.57
  -1   8  12 1139.08   47.99
   1   8 -12 1159.82   44.93
   1   8 -12 1146.36   50.50
  -1  -8  12 1162.75   50.52
   1  -8 -12 1107.86   46.41
   1  -8 -12 1124.71   46.09
  -1  -8  12 1122.35   46.44
   1  -8 -12 1121.95   47.11
  -1  -8  12 1118.04   49.78
  -1   8  11  284.06   48.44
   1   8 -11  241.95   28.47
  -1   8  11  328.60   39.30
  -1   8  11  261.56   41.87
   1   8 -11  286.94   19.01
   1   8 -11  315.76   48.73
   1  -8 -11  251.69   29.91
   1  -8 -11  262.16   35.16
  -1  -8  11  289.65   30.67
  -1  -8  11  301.94   27.50
   1  -8 -11  317.49   42.32
  -1  -8  11  262.98   16.85
  -1   8  10 4628.28  114.09
   1   8 -10 4595.15  113.39
  -1   8  10 4924.64  117.21
  -1   8  10 4750.97  117.03
   1   8 -10 4776.16  112.32
   1   8 -10 4617.26  116.93
   1  -8 -10 4790.41  117.64
   1  -8 -10 4778.67  115.10
  -1  -8  10 4734.47  125.09
  -1  -8  10 4684.31  110.22
   1  -8 -10 4666.46  113.95
  -1  -8  10 4833.11  119.13
  -1   8   9 3556.60   88.99
   1   8  -9 3471.36   85.48
  -1   8   9 3519.73   85.34
  -1   8   9 3574.82   89.31
   1   8  -9 3655.31   90.29
   1   8  -9 3616.71   93.02
   1  -8  -9 3496.89   97.50
   1  -8  -9 3639.56   88.27
  -1  -8   9 3497.87   86.66
  -1  -8   9 3458.45   83.00
   1  -8  -9 3534.50   97.49
  -1  -8   9 3501.84   89.86
  -1   8   8  809.83   32.94
   1   8  -8  828.83   30.48
  -1   8   8  808.97   32.98
   1   8  -8  874.19   36.60
   1   8  -8  869.84   31.33
  -1   8   8  780.77   33.15
  -1  -8   8  776.07   31.72
   1  -8  -8  873.58   35.21
  -1  -8   8  799.97   30.55
  -1  -8   8  820.99   30.98
   1  -8  -8  856.20   34.60
   1  -8  -8  879.71   33.01
  -1   8   7 6299.83  140.07
   1   8  -7 6427.43  208.11
  -1   8   7 6735.05  138.73
   1   8  -7 6742.89  145.79
  -1   8   7 6492.58  210.12
   1  -8  -7 6803.92  137.54
   1  -8  -7 6830.57  141.24
  -1  -8   7 6494.86  210.64
  -1  -8   7 6665.84  135.34
   1  -8  -7 6407.66  141.35
  -1  -8   7 6781.48  136.90
  -1  -8   7 6706.71  142.24
   1   8  -6  984.77   36.98
  -1   8   6 1037.86   41.50
   1   8  -6 1023.62   42.29
   1   8  -6 1070.25   42.75
  -1   8   6 1021.83   43.15
  -1   8   6 1042.28   55.40
   1  -8  -6 1070.98   47.98
  -1  -8   6 1015.88   40.74
  -1  -8   6  949.15   34.98
   1  -8  -6 1023.92   41.21
   1  -8  -6 1038.75   40.74
  -1  -8   6 1038.70   39.65
   1   8  -5 1973.76   54.15
  -1   8   5 1977.34   53.77
  -1   8   5 1830.62   76.42
   1   8  -5 1940.85   57.65
  -1   8   5 1899.58   55.52
   1   8  -5 1902.57   56.79
   1  -8  -5 1944.81   69.65
  -1  -8   5 1973.25   58.42
  -1  -8   5 1887.63   51.93
  -1  -8   5 1962.64   56.35
   1  -8  -5 1862.15   65.69
   1  -8  -5 1970.23   53.44
   1   8  -4 2373.85   63.79
  -1   8   4 2331.85   62.65
  -1   8   4 2196.52   69.60
   1   8  -4 2414.25   67.72
  -1   8   4 2405.61   67.71
   1   8  -4 2511.06   79.10
   1  -8  -4 2532.87   80.82
  -1  -8   4 2362.27   68.53
  -1  -8   4 2365.77   63.56
  -1  -8   4 2457.99   75.06
   1  -8  -4 2481.68   70.42
   1  -8  -4 2338.61   62.12
   1   8  -3 3363.24   87.14
  -1   8   3 3365.69   88.16
  -1   8   3 3436.47   79.51
   1   8  -3 3410.57   31.02
  -1   8   3 3330.46   89.03
   1   8  -3 3452.36   80.00
   1  -8  -3 3593.28   76.61
  -1  -8   3 3384.67   94.86
  -1  -8   3 3450.40   71.81
  -1  -8   3 3440.70   73.90
   1  -8  -3 3484.82   77.20
   1  -8  -3 3674.21   74.70
  -1   8   2 2735.84   70.12
   1   8  -2 2648.92   71.71
   1   8  -2 2554.84   68.34
   1   8  -2 2728.70   78.23
  -1   8   2 2546.27   69.54
   1  -8  -2 2680.74   72.35
  -1  -8   2 2559.58   69.70
  -1  -8   2 2580.54   70.60
  -1  -8   2 2577.48   69.84
   1  -8  -2 2564.48   71.39
   1  -8  -2 2569.35   67.49
  -1   8   1 2592.85   66.86
   1   8  -1 2543.26   67.98
  -1   8   1 2438.51   77.54
   1   8  -1 2501.72   68.69
   1   8  -1 2595.70   71.03
  -1  -8   1 2645.47   71.02
   1  -8  -1 2445.51   66.34
  -1  -8   1 2451.67   67.46
   1  -8  -1 2489.35   72.76
  -1  -8   1 2771.77   75.91
   1  -8  -1 2574.77   66.08
   1  -8  -1 2472.39   69.41
  -1   8   0  378.07    6.67
   1   8   0  421.61   28.85
   1   8   0  383.83   23.50
  -1   8   0  326.85   19.34
   1   8   0  440.51   30.04
  -1  -8   0  425.55   19.90
   1  -8   0  385.65   19.50
  -1  -8   0  403.49   20.74
   1  -8   0  397.11   19.08
  -1  -8   0  325.83   19.39
   1  -8   0  389.24   16.28
   1  -8   0  396.18   20.06
  -1   8  -1  256.08   13.29
   1   8   1  259.70   16.04
  -1   8  -1  252.20   14.15
   1   8   1  251.08   17.51
  -1   8  -1  247.61   15.51
   1   8   1  294.62   17.86
  -1  -8  -1  258.99   15.56
  -1  -8  -1  281.87   18.50
   1  -8   1  264.47   16.46
  -1  -8  -1  268.70   21.29
   1  -8   1  273.11   16.00
   1  -8   1  285.53   17.36
  -1   8  -2 2305.16   58.83
   1   8   2 2310.26   66.92
   1   8   2 2353.22   64.79
  -1   8  -2 2275.66   59.46
   1   8   2 2257.90   63.73
  -1   8  -2 2220.59   71.18
  -1   8  -2 2330.63   63.88
  -1  -8  -2 2293.81   63.91
   1  -8   2 2261.28   63.66
   1  -8   2 2259.31   61.10
  -1  -8  -2 2120.42   59.44
  -1  -8  -2 2325.94   63.49
  -1   8  -3  122.65   12.69
   1   8   3  142.81   25.70
   1   8   3  138.71   24.52
  -1   8  -3  161.27   19.38
   1   8   3  150.80   23.28
  -1   8  -3  167.64   23.29
  -1   8  -3  131.11   19.55
  -1  -8  -3  154.69   27.51
   1  -8   3  168.58   26.81
   1  -8   3  145.24   17.91
  -1  -8  -3  175.35   26.37
  -1  -8  -3  151.02   24.85
   1   8   4 1332.86   50.77
  -1   8  -4 1368.12   47.69
   1   8   4 1378.77   61.28
   1   8   4 1402.89   52.67
  -1   8  -4 1458.36   55.45
  -1   8  -4 1391.37   52.48
  -1  -8  -4 1439.07   53.41
  -1  -8  -4 1332.64   49.57
   1  -8   4 1372.78   50.35
   1  -8   4 1415.69   51.50
  -1  -8  -4 1390.77   63.58
   1  -8   4 1413.71   54.65
   1   8   512010.75  244.81
  -1   8  -511722.38  229.76
   1   8   511600.46  233.54
  -1   8  -512110.26  241.06
  -1   8  -511772.14  236.72
   1   8   511432.49  238.37
  -1  -8  -511784.23  236.65
  -1  -8  -511711.23  235.56
   1  -8   511895.20  238.41
   1  -8   511895.20  236.39
   1  -8   512092.05  237.67
  -1  -8  -512120.16  244.12
   1   8   6 2972.61   98.35
  -1   8  -6 3013.98   80.50
   1   8   6 3052.66   85.06
   1   8   6 2719.35   79.46
  -1   8  -6 2965.37   81.01
  -1   8  -6 2889.91   80.47
  -1  -8  -6 2901.29   93.35
  -1  -8  -6 2995.55   82.17
   1  -8   6 3076.41   82.09
   1  -8   6 2942.59   79.50
  -1  -8  -6 2955.76   82.80
   1  -8   6 2947.48   81.48
   1   8   7 1854.33   68.08
  -1   8  -7 1885.45   52.24
   1   8   7 1904.12   62.46
   1   8   7 1837.52   64.94
  -1   8  -7 1900.39   53.76
  -1   8  -7 1869.31   71.80
  -1  -8  -7 1900.53   56.66
  -1  -8  -7 1930.42   56.44
   1  -8   7 1921.39   52.37
   1  -8   7 1857.26   63.25
  -1  -8  -7 1895.46   57.01
   1  -8   7 1853.73   64.81
   1   8   8 1513.27   55.27
  -1   8  -8 1555.50   50.57
   1   8   8 1521.56   49.77
   1   8   8 1531.51   53.58
  -1   8  -8 1592.21   50.69
  -1   8  -8 1597.89   54.77
  -1  -8  -8 1368.07  215.33
  -1  -8  -8 1537.66   49.72
   1  -8   8 1581.33   58.27
   1  -8   8 1459.11   58.47
  -1  -8  -8 1467.47   56.88
   1  -8   8 1440.49   48.07
   1   8   9 2400.29   85.14
  -1   8  -9 2399.94   72.51
   1   8   9 2578.68   79.71
   1   8   9 2362.22   77.00
  -1   8  -9 2348.12   76.21
  -1   8  -9 2328.57   76.04
  -1  -8  -9 2385.75   74.60
  -1  -8  -9 2593.09   79.65
   1  -8   9 2357.12   70.83
   1  -8   9 2432.24   74.29
  -1  -8  -9 2297.22   73.09
   1  -8   9 2535.40   81.27
   1   8  10 2580.83   87.47
  -1   8 -10 2621.87   85.02
   1   8  10 2637.32   87.61
   1   8  10 2644.27   89.34
  -1   8 -10 2747.33   94.22
  -1   8 -10 2671.86   99.63
  -1  -8 -10 2557.72   85.21
  -1  -8 -10 2470.82   84.11
   1  -8  10 2626.44   88.46
   1  -8  10 2783.28   92.25
  -1  -8 -10 2529.62   85.50
   1  -8  10 2606.34   88.15
   1   8  11  181.86   25.85
   1   8  11  244.60   34.95
  -1   8 -11  203.25   19.96
   1   8  11  187.24   21.16
  -1   8 -11  224.03   32.12
  -1   8 -11  233.63   29.92
  -1  -8 -11  148.32   23.97
  -1  -8 -11  178.18   23.86
   1  -8  11  221.86   25.63
   1  -8  11  187.58   16.30
  -1  -8 -11  205.58   29.55
   1  -8  11  203.45   28.10
   1   8  12 5934.71  164.04
  -1   8 -12 5909.58  157.23
   1   8  12 5856.37  158.22
  -1   8 -12 5989.79  168.44
  -1   8 -12 6221.35  133.52
  -1  -8 -12 5803.13  156.82
  -1  -8 -12 5358.12  145.09
   1  -8  12 5838.21  155.64
  -1  -8 -12 5958.05  163.31
   1  -8  12 6227.31  132.68
   1   8  13 2542.25   87.14
   1   8  13 2542.30   87.74
  -1   8 -13 2397.83   87.78
  -1   8 -13 2453.42   87.39
  -1   8 -13 2493.17   87.73
   1  -8  13 2492.64   83.43
   1  -8  13 2508.12   85.58
  -1  -8 -13 2444.47   97.09
  -1  -8 -13 2672.88  106.87
  -1   8 -14 1976.52   68.89
   1   8  14 2027.13   71.61
  -1   8 -14 2102.26   77.75
  -1   8 -14 2141.34   79.96
   1  -8  14 2085.76   73.80
  -1  -8 -14 2037.92   78.19
   1  -8  14 2029.15   70.10
  -1  -8 -14 2111.95   75.21
  -1   8 -15  252.65   32.92
   1   8  15  366.89   53.84
  -1   8 -15  381.04   59.08
  -1   8 -15  407.94   57.54
   1  -8  15  366.09   36.50
  -1  -8 -15  349.60   49.38
   1  -8  15  328.01   43.34
  -1  -8 -15  345.89   38.51
  -1   8 -16 4631.98  147.80
   1   8  16 4538.19  147.38
  -1   8 -16 4422.25  165.11
  -1  -8 -16 4706.41  160.71
   1  -8  16 4521.30  155.44
   1  -8  16 4391.05  141.95
  -1  -8 -16 4696.83  154.06
  -1   8 -1711381.93  317.78
   1   8  1710580.12  301.76
  -1   8 -1711149.04  316.59
  -1  -8 -1711617.27  331.30
   1  -8  1711438.16  318.70
   1  -8  1711044.98  307.17
  -1  -8 -1711455.68  325.19
  -1   8 -18 3135.29  113.12
   1   8  18 3354.72  126.79
  -1   8 -18 3070.69  126.28
  -1  -8 -18 3215.92  154.28
   1  -8  18 2929.56  105.62
  -1  -8 -18 3136.52  115.34
   1  -8  18 2903.67  101.81
  -1   8 -19 4082.17  162.32
   1   8  19 4446.04  173.22
  -1   8 -19 4398.55  170.59
  -1  -8 -19 4530.51  179.24
   1  -8  19 4362.79  173.57
  -1  -8 -19 4382.16  171.77
   1  -8  19 3762.26  141.58
  -1   8 -20 1020.20   56.42
   1   8  20  991.16   58.32
  -1   8 -20 1171.67  136.66
  -1  -8 -20  856.26   62.79
   1  -8  20 1083.70   82.68
  -1  -8 -20 1014.47   81.66
  -1   8 -21  254.54   42.82
   1   8  21  287.39   56.79
  -1   8 -21  320.70   45.03
  -1  -8 -21  315.36   39.42
   1  -8  21  315.41   33.33
  -1  -8 -21  209.39   46.54
  -1   8 -22   30.04   16.35
   1   8  22   39.95    9.70
  -1   8 -22    2.57   12.68
  -1  -8 -22   40.36   28.49
   1  -8  22   13.71    7.46
  -1  -8 -22   11.99   11.08
   1   8  23   91.23   19.29
  -1   8 -23  126.92   28.83
  -1   8 -23   48.13   13.10
   1  -8  23   66.34   16.16
  -1  -8 -23   60.85   25.61
  -1  -8 -23   59.91   27.25
   1   8  24   52.90   24.77
  -1   8 -24   40.06   18.56
  -1   8 -24   23.23   10.23
   1  -8  24   -3.54    8.38
  -1  -8 -24   46.98   29.04
  -1  -8 -24    9.65   10.57
  -1   8 -25 4173.35  173.46
   1   8  25 4123.25  169.62
   1  -8  25 3740.36  151.21
  -1  -8 -25 4001.23  173.79
  -1  -8 -25 4067.52  167.94
  -1   8 -26  577.41   77.36
  -1   8 -26  383.78   69.35
   1  -8  26  581.54   52.95
  -1  -8 -26  692.01   91.52
  -1  -8 -26  561.14   66.44
  -1   8 -27  165.50   63.23
   1   8  27  188.87   48.42
   1  -8  27  219.80   41.10
  -1  -8 -27  194.23   40.32
  -1  -8 -27  174.08   47.69
  -1   8 -28   42.55   21.33
   1   8  28   14.82   10.67
   1  -8  28   31.65   11.78
  -1  -8 -28   20.98   15.26
   1   9 -28 1025.72  105.04
  -1   9  28 1211.67  104.11
  -1  -9  28  990.01  129.63
   1  -9 -28  843.27  204.61
   1   9 -27   19.48   25.34
  -1   9  27   46.31   15.40
  -1  -9  27   32.77   15.90
   1  -9 -27   39.76   15.69
   1  -9 -27   37.57   10.92
   1   9 -26  179.06   36.58
  -1   9  26  106.53   34.97
  -1  -9  26  129.49   35.32
   1  -9 -26  187.82   45.74
   1   9 -25  276.31   42.51
  -1   9  25  290.94   38.94
  -1  -9  25  263.58   64.96
   1  -9 -25  353.88   48.59
   1  -9 -25  227.85   54.91
   1   9 -24  241.48   49.99
  -1   9  24  227.96   48.13
  -1  -9  24  256.16   45.48
   1  -9 -24  174.29   81.49
   1  -9 -24  249.85   44.40
   1   9 -23   27.56    7.12
  -1   9  23   23.20    8.58
   1   9 -23   33.28   15.50
   1  -9 -23   33.10   22.06
  -1  -9  23   33.34    8.28
   1  -9 -23   36.99   15.55
   1   9 -22  563.32   16.45
  -1   9  22  631.87   68.49
   1   9 -22  586.35   49.10
   1  -9 -22  551.89   83.76
  -1  -9  22  619.94   49.51
   1  -9 -22  528.08   69.68
   1   9 -21  199.57   42.82
  -1   9  21  309.87   46.92
   1   9 -21  296.24   54.20
   1  -9 -21  292.09   58.83
  -1  -9  21  322.84   48.25
   1  -9 -21  295.74   30.87
   1   9 -20  316.47   34.64
  -1   9  20  386.44   61.35
   1   9 -20  390.23   42.33
   1  -9 -20  380.21   68.11
  -1  -9  20  353.65   29.61
  -1  -9  20  202.45   48.88
   1  -9 -20  377.60   38.75
   1   9 -19 1092.63   54.25
  -1   9  19 1170.20   83.10
   1   9 -19 1249.70   84.56
   1  -9 -19 1382.64  143.97
  -1  -9  19 1306.97   90.59
  -1  -9  19 1098.18   56.48
   1  -9 -19 1148.48  449.57
   1   9 -18 1072.04   59.51
  -1   9  18 1113.91   64.18
   1   9 -18 1102.25   76.73
   1  -9 -18 1265.59  150.38
  -1  -9  18 1146.10   64.90
  -1  -9  18 1054.61   62.93
   1  -9 -18 1256.92   67.47
   1   9 -17 1042.69   58.22
  -1   9  17 1007.42   59.70
   1   9 -17  948.69  119.49
   1  -9 -17  815.08   89.29
  -1  -9  17 1167.27   87.37
  -1  -9  17  990.02   56.60
   1  -9 -17  957.76   67.94
   1   9 -16  936.08   61.45
  -1   9  16 1009.31   72.83
   1   9 -16  961.24   77.14
   1  -9 -16  941.64   68.39
  -1  -9  16  919.57   80.12
  -1  -9  16  935.43   58.21
   1  -9 -16 1038.69   98.83
   1   9 -15   71.32   12.34
  -1   9  15   84.74   16.36
   1   9 -15   58.11   21.37
  -1   9  15   57.71   11.94
  -1  -9  15   76.14   14.95
  -1  -9  15   74.49   13.20
   1  -9 -15   79.36   13.87
   1  -9 -15  109.78   21.75
  -1   9  14 1946.40   78.49
   1   9 -14 1726.74   72.42
  -1   9  14 1869.78   77.41
   1   9 -14 1915.51   82.38
   1   9 -14 2054.30   78.68
  -1  -9  14 1987.78   88.99
  -1  -9  14 1857.70   74.22
   1  -9 -14 1852.13   93.81
   1  -9 -14 2072.42   95.30
  -1   9  13 1174.07   53.13
   1   9 -13 1111.42   47.57
  -1   9  13 1228.36   56.32
   1   9 -13 1253.07   79.87
   1   9 -13 1214.84   50.23
   1  -9 -13 1156.15   49.89
   1  -9 -13 1269.39   90.45
  -1  -9  13 1208.12   49.91
   1  -9 -13 1200.17   59.03
  -1  -9  13 1252.59   58.92
  -1   9  12   20.98    9.85
   1   9 -12    4.38    2.96
  -1   9  12    6.51    5.59
   1   9 -12   -7.78   13.93
  -1   9  12   12.42    7.71
   1   9 -12    2.14    4.37
   1  -9 -12    7.02    5.56
  -1  -9  12   -4.05    5.19
   1  -9 -12    4.75    6.71
  -1  -9  12    7.36    3.94
  -1   9  11  333.79   24.64
   1   9 -11  357.79   25.74
  -1   9  11  348.62   18.74
  -1   9  11  356.46   44.41
   1   9 -11  351.98   17.21
   1   9 -11  487.39   58.67
   1  -9 -11  314.39   51.36
   1  -9 -11  343.94   26.22
  -1  -9  11  407.74   47.61
  -1  -9  11  329.34   15.55
   1  -9 -11  420.94   54.97
  -1  -9  11  351.83   59.78
  -1   9  10  271.64   48.27
   1   9 -10  288.68   31.80
  -1   9  10  322.73   37.43
  -1   9  10  271.45   58.71
   1   9 -10  263.31   12.18
   1   9 -10  388.05   57.50
   1  -9 -10  273.45   59.26
   1  -9 -10  325.80   41.09
  -1  -9  10  360.14   45.55
  -1  -9  10  264.07   11.10
   1  -9 -10  281.22   20.89
  -1  -9  10  316.43   58.23
  -1   9   9 2812.13   87.73
   1   9  -9 2770.76   67.68
  -1   9   9 2969.01   76.13
  -1   9   9 2807.24   73.49
   1   9  -9 2860.07   74.96
   1   9  -9 3128.43  112.19
   1  -9  -9 2890.70   81.38
   1  -9  -9 2844.66   73.32
  -1  -9   9 2928.83   89.54
  -1  -9   9 2768.46   70.45
   1  -9  -9 2981.12   91.92
  -1  -9   9 2688.98   71.26
  -1   9   8 1201.15   55.73
   1   9  -8 1217.18   42.56
  -1   9   8 1156.40   49.59
   1   9  -8 1188.93   46.18
  -1   9   8 1227.31   46.38
   1  -9  -8 1172.51   41.23
   1  -9  -8 1285.77   83.23
  -1  -9   8 1135.92   44.12
  -1  -9   8 1078.74   38.74
   1  -9  -8 1187.05   45.63
  -1  -9   8 1183.91   44.26
  -1  -9   8 1153.10   41.91
   1   9  -7  514.90   28.38
  -1   9   7  479.02   33.89
   1   9  -7  493.15   57.66
   1   9  -7  520.20   82.23
  -1   9   7  471.66   22.51
  -1   9   7  496.50   28.88
   1  -9  -7  529.82   89.25
  -1  -9   7  483.63   22.21
  -1  -9   7  526.77   83.48
   1  -9  -7  537.38   36.02
   1  -9  -7  519.81   85.09
  -1  -9   7  496.84   23.04
   1   9  -6  135.26   22.08
  -1   9   6  150.99   22.73
   1   9  -6  138.60   21.71
   1   9  -6  127.52   29.19
  -1   9   6  163.90   27.88
  -1   9   6  121.18   14.57
   1  -9  -6  122.03   13.94
  -1  -9   6  135.71   19.94
  -1  -9   6  134.75   19.38
   1  -9  -6  100.84   26.57
   1  -9  -6  144.07   15.91
  -1  -9   6  143.31   23.41
   1   9  -517208.34  189.48
  -1   9   517311.61  193.05
   1   9  -517843.61  203.79
   1   9  -517424.15  196.56
  -1   9   517079.73  197.37
  -1   9   517417.20  207.52
   1  -9  -516886.39  193.53
  -1  -9   517342.32  208.47
  -1  -9   516754.56  185.85
   1  -9  -517866.63  206.29
   1  -9  -516559.49  186.05
  -1  -9   517854.26  201.31
   1   9  -4 6040.42  129.02
  -1   9   4 5801.94  122.81
   1   9  -4 5990.68  143.49
   1   9  -4 6146.30  133.20
  -1   9   4 5898.47  134.97
  -1   9   4 6030.06  133.74
   1  -9  -4 6218.03  132.65
  -1  -9   4 6054.56  133.86
  -1  -9   4 5928.09  126.76
   1  -9  -4 6238.62  135.59
  -1  -9   4 5923.37  129.05
   1  -9  -4 6115.63  138.63
  -1   9   3   26.56    4.28
  -1   9   3   34.35   14.59
   1   9  -3   16.71   10.44
  -1   9   3   30.45   14.07
   1   9  -3   44.54   12.56
  -1  -9   3   20.25   11.01
   1  -9  -3   16.00    8.89
  -1  -9   3   15.28    5.40
   1  -9  -3   23.83   13.64
  -1  -9   3   20.31    9.89
   1  -9  -3   22.44    3.94
  -1   9   2 5701.80  119.59
   1   9  -2 5439.81  120.42
   1   9  -2 5307.85  114.57
   1   9  -2 5450.46  125.76
  -1   9   2 5462.75  124.61
  -1  -9   2 5547.08  119.68
   1  -9  -2 5519.91  120.37
  -1  -9   2 5429.28  119.64
   1  -9  -2 5337.04  137.03
   1  -9  -2 5335.18  113.06
  -1   9   1  516.66   21.69
   1   9  -1  529.25   24.26
  -1   9   1  506.28   24.75
   1   9  -1  544.25   31.85
   1   9  -1  513.24   28.46
   1  -9  -1  560.07   23.40
   1  -9  -1  523.65   26.84
  -1  -9   1  543.38   25.32
   1  -9  -1  550.65   38.68
  -1  -9   1  581.87   38.09
  -1  -9   1  509.14   24.47
   1  -9  -1  525.30   28.03
  -1   9   0  454.72   18.88
   1   9   0  436.45   25.79
   1   9   0  447.51   36.62
   1   9   0  470.44   33.04
  -1   9   0  464.90   24.31
  -1  -9   0  443.27   21.23
   1  -9   0  483.82   26.72
  -1  -9   0  537.11   42.17
   1  -9   0  443.12   25.53
  -1  -9   0  439.09   34.56
   1  -9   0  482.72   26.19
   1  -9   0  419.37   19.54
  -1   9  -1   16.03    2.23
  -1   9  -1   11.56    3.53
   1   9   1   17.34    5.83
   1   9   1   19.01   15.39
  -1   9  -1   25.92   10.79
   1   9   1   10.07    5.62
  -1  -9  -1   28.83    7.97
   1  -9   1   20.65    5.73
  -1  -9  -1   19.29    5.17
  -1  -9  -1   17.58    9.85
   1  -9   1   17.87    6.53
   1  -9   1   28.16    9.50
  -1   9  -2 3957.36   83.59
   1   9   2 3872.91   85.49
  -1   9  -2 3898.03   82.57
   1   9   2 3909.86   92.12
  -1   9  -2 3803.00   86.42
   1   9   2 3947.06   89.09
  -1  -9  -2 3864.81   86.58
  -1  -9  -2 3786.88   85.12
   1  -9   2 3931.49   94.34
  -1  -9  -2 3774.77   87.04
   1  -9   2 3792.40   84.28
   1  -9   2 3808.52   91.08
  -1   9  -3 5617.32  117.45
   1   9   3 5792.43  125.61
   1   9   3 5584.04  123.14
  -1   9  -3 5536.20  116.50
   1   9   3 5431.90  123.29
  -1   9  -3 5617.22  122.82
  -1   9  -3 5685.04  125.88
   1  -9   3 5558.77  122.31
   1  -9   3 5412.73  116.74
  -1  -9  -3 5401.74  119.13
  -1  -9  -3 5529.46  126.24
  -1  -9  -3 5696.53  124.37
  -1   9  -4  118.37   10.26
   1   9   4  177.97   27.63
   1   9   4  121.16   22.34
  -1   9  -4  156.82   19.92
   1   9   4  147.24   32.19
  -1   9  -4  136.91   27.53
  -1   9  -4  108.35   14.94
  -1  -9  -4  108.56   15.01
   1  -9   4  168.94   27.00
   1  -9   4  135.75   20.78
  -1  -9  -4  152.91   28.90
  -1  -9  -4  145.99   20.86
   1   9   5  161.14   12.93
  -1   9  -5  179.93   15.68
   1   9   5  152.71   20.28
   1   9   5  214.55   29.54
  -1   9  -5  180.63   35.33
  -1   9  -5  176.54   30.28
  -1  -9  -5  231.56   30.25
  -1  -9  -5  179.15   28.89
   1  -9   5  180.14   15.33
   1  -9   5  205.10   31.48
  -1  -9  -5  195.13   38.75
   1  -9   5  215.12   36.79
   1   9   6 5561.94  123.82
  -1   9  -6 5539.86  117.38
   1   9   6 5828.66  126.36
   1   9   6 6182.68  138.97
  -1   9  -6 5918.63  128.23
  -1   9  -6 5893.06  132.22
  -1  -9  -6 5719.94  125.67
  -1  -9  -6 5843.91  131.34
   1  -9   6 5798.87  123.20
   1  -9   6 5706.15  123.45
  -1  -9  -6 5767.62  133.78
   1  -9   6 5740.83  127.42
   1   9   711120.35  144.53
  -1   9  -711266.69  136.98
   1   9   710788.20  135.45
   1   9   710275.57 1589.07
  -1   9  -711128.24  141.23
  -1   9  -711189.32  145.00
  -1  -9  -711193.44  144.75
  -1  -9  -710973.15  139.60
   1  -9   711010.13  133.21
   1  -9   710681.13 1651.34
  -1  -9  -711027.33  145.75
   1  -9   710932.98  142.71
   1   9   815894.05  201.20
  -1   9  -816160.69  194.01
   1   9   816856.29  208.36
   1   9   815366.38  199.95
  -1   9  -816102.74  200.63
  -1   9  -815580.05  199.09
  -1  -9  -815913.68  198.52
  -1  -9  -815839.16  206.71
   1  -9   816790.80  203.12
   1  -9   815425.44  196.40
  -1  -9  -815528.12  195.99
   1  -9   815077.85  193.78
   1   9   9  728.94   72.30
  -1   9  -9  759.46   36.64
   1   9   9  738.41   29.53
   1   9   9  550.11   54.49
  -1   9  -9  725.01   39.07
  -1   9  -9  730.43   40.27
  -1  -9  -9  705.06   64.20
  -1  -9  -9  697.56  119.28
   1  -9   9  750.19   28.92
   1  -9   9  669.26  114.12
  -1  -9  -9  705.37   31.99
   1  -9   9  657.72  117.62
   1   9  10  597.78   31.60
  -1   9 -10  584.50   27.71
   1   9  10  545.69   26.86
   1   9  10  630.73   67.73
  -1   9 -10  618.10   42.71
  -1   9 -10  600.42   84.86
  -1  -9 -10  606.83   35.50
  -1  -9 -10  584.84   28.22
   1  -9  10  586.52   27.27
   1  -9  10  544.97   29.79
  -1  -9 -10  591.18   30.07
   1  -9  10  527.06   33.66
   1   9  11   62.50   14.05
  -1   9 -11   53.18    7.57
   1   9  11   39.61    7.04
   1   9  11   37.69    8.78
  -1   9 -11   37.27    7.34
  -1   9 -11   60.75   23.85
  -1  -9 -11   40.16    9.10
  -1  -9 -11   33.12    9.44
   1  -9  11   46.99   10.08
   1  -9  11   53.22    9.06
  -1  -9 -11   72.20   15.74
   1  -9  11   50.90   14.44
   1   9  12 1496.71   60.95
  -1   9 -12 1477.68   56.86
   1   9  12 1423.40   56.72
  -1   9 -12 1449.32   58.26
   1   9  12 1463.03  113.00
  -1   9 -12 1573.17   49.76
   1  -9  12 1581.67   32.13
  -1  -9 -12 1426.35   56.73
   1  -9  12 1514.77   59.24
  -1  -9 -12 1537.47   62.05
   1  -9  12 1408.64   62.16
  -1   9 -13   16.06    6.08
   1   9  13   30.78   11.65
  -1   9 -13    3.77    3.03
  -1   9 -13    6.35    9.86
   1  -9  13   22.10    6.59
  -1  -9 -13   12.57    5.98
   1  -9  13   15.57    4.38
  -1  -9 -13   21.20   15.28
   1   9  14   21.64   11.55
  -1   9 -14    9.61    6.40
  -1   9 -14   -1.30   12.09
  -1   9 -14   -3.22   10.63
   1  -9  14  -12.60   10.01
  -1  -9 -14    7.66   17.27
   1  -9  14   20.84    8.19
  -1  -9 -14   21.12   12.93
  -1   9 -1512725.73  256.76
   1   9  1512605.02  257.65
  -1   9 -1512396.60  262.42
  -1  -9 -1512013.25  253.97
   1  -9  1512806.42  261.83
   1  -9  1511532.00  237.70
  -1  -9 -1512414.79  257.62
  -1   9 -16 3793.22  123.19
   1   9  16 3937.85  130.00
  -1   9 -16 3782.25  131.48
  -1  -9 -16 3869.78  137.82
   1  -9  16 3749.00  126.40
   1  -9  16 3706.99  120.98
  -1  -9 -16 3733.65  126.98
  -1   9 -17   66.83   16.27
   1   9  17   45.52   14.11
  -1   9 -17  107.82   24.34
  -1  -9 -17   81.20   27.43
   1  -9  17   90.90   17.87
   1  -9  17   47.68   12.79
  -1  -9 -17   88.17   19.86
  -1   9 -18  429.47   63.85
   1   9  18  482.27   69.23
  -1   9 -18  438.90   68.82
  -1  -9 -18  482.04   63.81
   1  -9  18  468.33   67.21
   1  -9  18  322.24   53.81
  -1  -9 -18  515.74   64.44
  -1   9 -19 1212.79   59.51
   1   9  19 1372.44   69.20
  -1   9 -19 1214.05  114.92
  -1  -9 -19 1352.98  159.90
   1  -9  19 1382.04   79.00
  -1  -9 -19 1232.78   85.55
  -1   9 -20 3300.17  133.21
   1   9  20 3307.59  137.28
  -1   9 -20 2985.31  127.55
  -1  -9 -20 3128.19  152.10
   1  -9  20 3221.19  129.80
  -1  -9 -20 3088.76  127.10
  -1   9 -21  654.98   48.37
   1   9  21  682.33   28.93
  -1   9 -21  598.46  109.90
  -1  -9 -21  665.31   59.60
   1  -9  21  720.55   52.60
  -1  -9 -21  716.00   97.11
  -1   9 -22  270.21   56.30
   1   9  22  273.57   53.84
  -1   9 -22  286.54   40.87
  -1  -9 -22  344.15   50.48
   1  -9  22  320.20   32.52
  -1  -9 -22  223.14   63.59
  -1   9 -23 3162.53  134.87
   1   9  23 2977.97  137.73
  -1   9 -23 2973.87  154.46
  -1  -9 -23 3379.72  158.33
   1  -9  23 3095.96  145.20
  -1  -9 -23 3054.54  136.72
  -1   9 -24    6.96    6.43
   1   9  24   20.28   10.77
  -1   9 -24   15.21   12.22
  -1  -9 -24   39.84   24.52
   1  -9  24   -1.13   11.01
  -1  -9 -24   29.05   13.25
  -1   9 -25    7.63    8.99
   1   9  25   12.21   13.54
  -1   9 -25   22.64   10.12
  -1  -9 -25   36.05   14.09
   1  -9  25   12.47    8.27
  -1  -9 -25   26.37   14.41
  -1   9 -26   10.35    9.35
   1   9  26    9.72    9.29
  -1   9 -26   56.35   19.42
  -1  -9 -26   16.40   20.55
   1  -9  26   -5.08   11.66
  -1  -9 -26   43.48   15.87
  -1   9 -27 1518.41   95.44
   1   9  27 1543.62  107.35
   1  -9  27 1483.70   86.02
  -1  -9 -27 1156.35  211.09
  -1  -9 -27 1248.15   87.10
  -1   9 -28 2116.18  147.96
   1   9  28 2119.11  129.42
   1  -9  28 2053.46  123.20
  -1  -9 -28 1973.16  147.47
  -1  -9 -28 1893.40  121.71
   1  10 -27   74.13   26.58
  -1  10  27   21.97    9.58
  -1 -10  27   49.66   16.35
   1 -10 -27  100.87   29.26
   1 -10 -27   14.57   13.01
   1  10 -26  622.13   99.25
  -1  10  26  531.38   93.10
  -1 -10  26  674.42   76.26
   1 -10 -26  661.39   95.78
   1 -10 -26  602.99   40.17
   1  10 -25  211.54   47.02
  -1  10  25  224.06   41.54
  -1 -10  25  249.92   39.43
   1 -10 -25  187.33   59.07
   1 -10 -25  216.07   39.37
   1  10 -24  409.50   81.97
  -1  10  24  481.95   73.98
  -1 -10  24  478.99   71.85
   1 -10 -24  509.11   75.56
   1 -10 -24  476.60   80.60
   1  10 -23  116.59   35.60
  -1  10  23  269.66   47.37
   1  10 -23  244.59   43.22
   1 -10 -23  234.19   60.70
  -1 -10  23  240.59   49.61
   1 -10 -23  222.06   36.68
   1  10 -22   61.81   18.97
  -1  10  22   98.59   22.67
   1  10 -22   81.24   26.61
   1 -10 -22  126.60   25.86
  -1 -10  22   85.66   19.99
   1 -10 -22  132.35   18.47
   1  10 -21 2492.73  539.62
  -1  10  21 2672.79   96.56
   1  10 -21 2672.56  181.60
   1 -10 -21 2636.63  119.15
  -1 -10  21 2866.61  101.24
   1 -10 -21 2615.30   94.87
   1  10 -20    7.61    5.53
  -1  10  20   26.60   11.66
   1  10 -20    9.04   22.37
   1 -10 -20   22.19   18.72
  -1 -10  20   15.72    8.72
   1 -10 -20    3.67    9.19
   1  10 -19  986.86   51.37
  -1  10  19  893.76   55.87
   1  10 -19  968.43  104.82
   1 -10 -19 1034.94   65.79
  -1 -10  19  981.93   77.08
  -1 -10  19  907.66   47.02
   1 -10 -19  980.10   76.92
   1  10 -18 1567.14   80.40
  -1  10  18 1613.51   84.56
   1  10 -18 1702.70  171.87
   1 -10 -18 1474.37  176.53
  -1 -10  18 1526.14  129.39
  -1 -10  18 1395.66   76.92
   1 -10 -18 1462.64   76.80
   1  10 -17    9.74    4.23
  -1  10  17   16.32    7.42
   1  10 -17   30.62   14.39
   1 -10 -17   27.38   12.75
  -1 -10  17   17.39   13.65
  -1 -10  17   16.34    5.06
   1 -10 -17   11.20   13.57
   1  10 -16  603.78   50.04
  -1  10  16  556.54   48.64
   1  10 -16  570.55   77.60
   1 -10 -16  636.38   94.96
  -1 -10  16  631.32   60.51
  -1 -10  16  569.84   57.06
   1 -10 -16  594.22   69.05
  -1  10  15 5631.29  157.41
   1  10 -15 5942.99  163.74
  -1 -10  15 6082.06  170.11
   1 -10 -15 6033.31  187.84
  -1 -10  15 5414.95  150.35
   1 -10 -15 5832.80  166.98
   1  10 -14 2098.04   82.16
  -1  10  14 2104.09   84.22
   1  10 -14 1917.77   81.17
   1 -10 -14 2265.79   98.06
  -1 -10  14 2082.82   88.87
  -1 -10  14 1960.98   79.24
   1 -10 -14 2102.72   84.68
   1  10 -13 2069.21  108.73
   1  10 -13 1770.27   61.52
  -1  10  13 1960.99   69.47
  -1  10  13 1859.66   79.60
  -1  10  13 1759.49   63.96
   1  10 -13 2002.29   75.15
  -1 -10  13 1898.60   64.02
   1 -10 -13 1994.62   74.30
  -1 -10  13 1875.55   78.40
  -1  10  12 2392.48   84.25
   1  10 -12 2305.01   78.64
  -1  10  12 2486.21   88.62
   1  10 -12 2636.50  132.29
  -1  10  12 2446.91  110.91
   1  10 -12 2548.41   88.49
   1 -10 -12 2404.82   82.45
  -1 -10  12 2279.09   77.06
   1 -10 -12 2480.30   89.04
  -1 -10  12 2415.89   86.66
  -1  10  11   46.32    8.85
   1  10 -11   56.80    8.88
  -1  10  11   22.58    8.33
   1  10 -11   67.15   14.66
  -1  10  11   58.67   11.60
   1  10 -11   55.84    9.43
   1 -10 -11   32.21    7.72
  -1 -10  11   36.14    8.48
   1 -10 -11   69.01   12.58
  -1 -10  11   53.99    8.30
  -1  10  10  374.06   36.08
   1  10 -10  417.20   47.50
  -1  10  10  432.74   22.42
   1  10 -10  446.99   48.45
  -1  10  10  394.54   55.81
   1 -10 -10  421.67   38.89
   1 -10 -10  384.80   52.66
  -1 -10  10  444.29   63.63
  -1 -10  10  384.97   25.33
   1 -10 -10  503.09   63.67
  -1 -10  10  391.56   28.49
  -1  10   9  902.41   56.78
   1  10  -9  871.46   38.17
  -1  10   9  971.36   39.81
   1  10  -9  876.95   37.16
  -1  10   9  814.43   40.58
   1 -10  -9  902.35   32.69
   1 -10  -9  873.83   33.69
  -1 -10   9  776.34   35.98
  -1 -10   9  830.79   30.28
   1 -10  -9  867.60   37.43
  -1 -10   9  886.27   30.54
  -1 -10   9  833.52   40.87
   1  10  -8 4260.58   99.53
  -1  10   8 4500.38  107.05
  -1  10   8 4249.96  118.94
   1  10  -8 4359.36  117.06
  -1  10   8 4230.07  110.80
   1  10  -8 4146.94  122.49
   1 -10  -8 4473.85  108.20
  -1 -10   8 4287.47  104.88
  -1 -10   8 4286.41  102.13
   1 -10  -8 4388.39  108.96
  -1 -10   8 4325.01  109.60
   1 -10  -8 4283.04  100.98
   1  10  -7 1187.06   41.99
  -1  10   7 1158.69   43.68
  -1  10   7 1186.81   46.79
   1  10  -7 1187.51   47.30
  -1  10   7 1168.21   44.80
   1  10  -7 1170.32   48.11
   1 -10  -7 1107.41   44.86
  -1 -10   7 1183.50   44.95
  -1 -10   7 1177.81   41.36
   1 -10  -7 1108.50   43.53
  -1 -10   7 1194.27   44.90
   1 -10  -7 1095.44   39.20
   1  10  -611755.19  145.95
  -1  10   611589.37  142.06
   1  10  -611998.12  156.90
   1  10  -611472.99  152.67
  -1  10   611536.94  149.63
  -1  10   612121.41  158.21
   1 -10  -611289.77  145.55
  -1 -10   611509.21  152.39
  -1 -10   611434.89  142.20
   1 -10  -611376.41  147.66
   1 -10  -610987.57  135.57
  -1 -10   611395.96  153.94
   1  10  -5 3061.70   73.23
  -1  10   5 2974.74   71.31
   1  10  -5 3208.26   82.06
   1  10  -5 3050.24   75.57
  -1  10   5 3168.89   83.05
  -1  10   5 3049.99   79.71
   1 -10  -5 3224.96   82.81
  -1 -10   5 3316.78   83.50
  -1 -10   5 3168.60   76.45
  -1 -10   5 3199.91   87.53
   1 -10  -5 3296.77   79.24
   1 -10  -5 2997.73   76.07
   1  10  -4  891.31   36.10
  -1  10   4  862.68   32.42
  -1  10   4  899.19   48.02
   1  10  -4  894.16   39.16
  -1  10   4  862.20   42.26
   1  10  -4  966.37   43.55
   1 -10  -4  897.28   43.67
  -1 -10   4  929.10   51.63
  -1 -10   4  865.09   34.07
   1 -10  -4  900.85   38.05
  -1 -10   4  895.14   39.12
   1 -10  -4  903.15   37.43
  -1  10   310164.01  201.21
  -1  10   310527.88  216.55
   1  10  -310540.04  212.51
  -1  10   310216.81  206.40
   1  10  -310902.79  225.05
   1 -10  -310228.46  219.24
  -1 -10   310225.28  207.33
  -1 -10   310366.68  207.15
  -1 -10   310944.37  220.41
   1 -10  -310966.97  224.77
   1 -10  -310460.05  208.06
  -1  10   2 3353.22   87.58
   1  10  -2 3294.98   90.68
   1  10  -2 3262.28   92.25
  -1  10   2 3253.67   90.59
   1  10  -2 3262.58   98.62
  -1 -10   2 3265.38   89.34
   1 -10  -2 3284.65   92.11
  -1 -10   2 3187.20   92.39
   1 -10  -2 3209.88   86.58
  -1 -10   2 3336.50   91.20
   1 -10  -2 3424.61   90.34
  -1  10   1 3163.16   82.12
  -1  10   1 3335.75   92.24
   1  10  -1 3316.98   89.46
   1  10  -1 3273.56   89.45
   1  10  -1 3170.65   87.96
  -1 -10   1 3153.04   88.26
   1 -10  -1 3141.45   86.03
  -1 -10   1 3134.79   86.88
   1 -10  -1 3174.97   86.05
   1 -10  -1 3174.62   84.05
   1 -10  -1 3217.75   97.02
  -1 -10   1 3238.48   98.14
  -1  10   0  307.25   14.48
   1  10   0  314.83   25.80
   1  10   0  406.10   56.92
  -1  10   0  339.31   38.01
   1  10   0  334.61   26.26
  -1 -10   0  271.55   14.56
   1 -10   0  279.97   13.68
   1 -10   0  286.46   24.10
   1 -10   0  276.28   20.64
  -1 -10   0  301.69   33.96
  -1 -10   0  273.83   21.07
   1 -10   0  359.76   54.25
  -1  10  -1  258.34   12.13
   1  10   1  294.27   17.09
  -1  10  -1  285.87   14.22
  -1  10  -1  279.42   41.99
   1  10   1  287.23   25.66
   1  10   1  252.28   21.84
  -1 -10  -1  284.41   19.07
   1 -10   1  328.85   44.84
   1 -10   1  261.31   17.61
  -1 -10  -1  337.70   49.54
  -1 -10  -1  340.31   49.02
   1 -10   1  333.61   55.00
  -1  10  -2  119.39    4.37
   1  10   2  148.72   26.64
  -1  10  -2  146.29   28.85
  -1  10  -2  119.05    6.29
   1  10   2  154.84   25.83
   1  10   2  158.16   33.29
  -1 -10  -2  161.06   27.39
   1 -10   2  163.54   25.92
   1 -10   2  173.80   23.31
  -1 -10  -2  154.08   26.62
  -1 -10  -2  133.45   19.75
   1 -10   2  174.31   27.50
  -1  10  -3  926.10   34.62
   1  10   3  950.75   36.60
  -1  10  -3  945.67   40.62
  -1  10  -3  936.43   36.07
   1  10   3 1016.92   52.74
   1  10   3  911.56   40.54
  -1 -10  -3  900.17   37.86
   1 -10   3  939.47   37.66
   1 -10   3  941.78   36.30
  -1 -10  -3  874.93   45.44
  -1 -10  -3  964.82   37.93
   1 -10   3  933.99   39.38
  -1  10  -4 1876.54   50.27
   1  10   4 1710.80   63.64
   1  10   4 1828.98   73.84
  -1  10  -4 1838.52   61.43
   1  10   4 1841.47   70.00
  -1  10  -4 1822.79   68.64
  -1  10  -4 1847.78   70.37
  -1 -10  -4 1849.16   65.65
   1 -10   4 1842.73   65.20
   1 -10   4 1743.59   72.01
  -1 -10  -4 1889.10   57.64
  -1 -10  -4 1977.68   57.23
  -1  10  -515776.09  185.77
   1  10   515978.98  197.11
  -1  10  -515894.57  201.06
  -1  10  -516234.34  194.28
   1  10   515976.92  198.55
  -1  10  -516257.04  202.37
  -1 -10  -515923.36  206.51
   1 -10   516388.39  205.07
  -1 -10  -515665.68  192.82
   1 -10   516004.93  196.61
  -1 -10  -515976.71  204.41
   1  10   622630.47  280.61
  -1  10  -622269.93  261.61
   1  10   623056.79  279.60
   1  10   623188.76  283.32
  -1  10  -623318.49  282.99
  -1  10  -622654.25  288.64
  -1 -10  -622735.18  280.97
  -1 -10  -622461.51  272.58
   1 -10   622407.89  262.98
   1 -10   622775.92  274.36
  -1 -10  -623092.53  283.65
   1 -10   622514.47  284.01
   1  10   7 5549.18  118.23
  -1  10  -7 5747.94  114.71
   1  10   7 5540.83  113.81
   1  10   7 5641.55  118.78
  -1  10  -7 5766.83  127.77
  -1  10  -7 5681.78  124.89
  -1 -10  -7 5091.78  123.85
  -1 -10  -7 5589.80  114.91
   1 -10   7 5822.04  118.97
   1 -10   7 5491.69  113.25
  -1 -10  -7 5825.25  125.83
   1 -10   7 5702.43  120.25
   1  10   8 1756.35   69.73
  -1  10  -8 1772.45   58.23
   1  10   8 1809.77   63.61
   1  10   8 1895.84   68.82
  -1  10  -8 1889.08   68.66
  -1  10  -8 1718.45   61.29
  -1 -10  -8 1861.37   75.17
  -1 -10  -8 1806.98   64.37
   1 -10   8 1777.00   59.38
   1 -10   8 1757.05   64.44
  -1 -10  -8 1866.97  101.59
   1 -10   8 1690.63   60.17
   1  10   9 3485.20  104.02
  -1  10  -9 3624.22   87.15
   1  10   9 3658.94   89.85
   1  10   9 3398.77   85.01
  -1  10  -9 3572.16   93.26
  -1  10  -9 3402.39  103.68
  -1 -10  -9 3545.35   87.62
  -1 -10  -9 3592.83   87.72
   1 -10   9 3615.33   85.99
   1 -10   9 3440.02   85.91
  -1 -10  -9 3538.17   89.20
   1 -10   9 3434.60   86.91
   1  10  10 1220.44   73.30
   1  10  10 1218.65   53.12
  -1  10 -10 1283.85   50.55
   1  10  10 1225.72   50.39
  -1  10 -10 1242.08   51.32
  -1  10 -10 1294.67   69.49
  -1 -10 -10 1210.60   49.63
  -1 -10 -10 1323.49   53.50
   1 -10  10 1317.14   56.96
   1 -10  10 1212.21   60.29
  -1 -10 -10 1257.35   65.01
   1 -10  10 1294.66   56.80
   1  10  11 1029.47   58.67
   1  10  11 1107.62   45.68
  -1  10 -11 1077.75   42.86
  -1  10 -11 1102.04   45.34
   1  10  11  947.74   55.56
  -1  10 -11 1146.49   51.69
   1 -10  11 1134.16   51.78
  -1 -10 -11 1071.25   44.54
   1 -10  11 1083.08   43.85
  -1 -10 -11 1039.65   48.04
   1 -10  11 1092.67   49.18
   1  10  12  673.20   68.83
   1  10  12  545.52   36.43
  -1  10 -12  590.65   48.72
  -1  10 -12  649.68   55.73
  -1  10 -12  653.96   44.65
  -1 -10 -12  515.66   77.73
   1 -10  12  778.91   64.88
   1 -10  12  583.15   37.63
  -1 -10 -12  584.26   42.74
  -1  10 -13 2938.86  110.03
  -1  10 -13 2925.50   86.36
   1  10  13 2765.37  106.76
   1  10  13 3014.59  101.91
  -1  10 -13 3087.08   91.65
   1 -10  13 3073.13  101.59
   1 -10  13 2891.86   86.03
  -1 -10 -13 3035.39   93.52
  -1  10 -14 1394.53   56.88
   1  10  14 1415.71   61.28
  -1  10 -14 1390.56   63.56
  -1  10 -14 1442.99   62.57
   1 -10  14 1514.34   61.51
  -1 -10 -14 1549.26   71.97
   1 -10  14 1260.87   52.10
  -1 -10 -14 1418.02   67.75
   1  10  15  679.63   90.15
  -1  10 -15  512.14   55.63
  -1  10 -15  793.52  104.85
  -1  10 -15  700.83   74.29
   1 -10  15  784.19   73.33
  -1 -10 -15  758.25  109.16
   1 -10  15  528.84   43.79
  -1 -10 -15  678.26   94.24
  -1  10 -16    8.20   12.44
   1  10  16   -4.09   12.91
  -1  10 -16   20.76   14.10
  -1 -10 -16   29.87   23.70
   1 -10  16   31.01    9.41
   1 -10  16   13.15    5.51
  -1 -10 -16   24.11   11.32
  -1  10 -17 3622.15  137.91
   1  10  17 3577.35  139.71
  -1  10 -17 3598.64  142.38
  -1 -10 -17 3540.32  144.17
   1 -10  17 3636.29  145.86
   1 -10  17 3287.53  123.99
  -1 -10 -17 3261.40  155.38
  -1  10 -18 6027.33  198.09
   1  10  18 6381.31  211.81
  -1  10 -18 5846.61  201.26
  -1 -10 -18 5878.70  207.52
   1 -10  18 5961.09  200.40
  -1 -10 -18 5661.84  233.90
  -1  10 -19  139.15   24.70
   1  10  19  129.11   26.79
  -1  10 -19  156.56   33.32
  -1 -10 -19  122.46   27.18
   1 -10  19  134.42   25.87
  -1 -10 -19  172.20   27.16
  -1  10 -20  505.86   53.84
   1  10  20  506.39   54.41
  -1  10 -20  554.23   92.86
  -1 -10 -20  616.30   62.64
   1 -10  20  651.23  246.99
  -1 -10 -20  542.04   68.91
  -1  10 -21  274.10   57.10
   1  10  21  249.20   61.46
  -1  10 -21  312.14   56.99
  -1 -10 -21  419.89   48.77
   1 -10  21  321.52   50.31
  -1 -10 -21  282.03   63.29
  -1  10 -22  230.99   65.85
   1  10  22  328.48   69.18
  -1  10 -22  380.14   70.89
  -1 -10 -22  328.72   51.36
   1 -10  22  430.34   38.46
  -1 -10 -22  304.92   62.64
  -1  10 -23  786.41   32.48
   1  10  23  742.43   97.87
  -1  10 -23  848.94  106.13
  -1 -10 -23  881.59  139.21
   1 -10  23  781.30   55.04
  -1 -10 -23  827.06  126.95
  -1  10 -24  471.39  182.28
   1  10  24  454.38  100.91
  -1  10 -24  555.58   68.14
  -1 -10 -24  514.69  101.16
   1 -10  24  520.16   82.29
  -1 -10 -24  336.77  105.83
  -1  10 -25 2598.26  109.69
   1  10  25 2933.70  125.07
  -1  10 -25 2924.54  127.75
  -1 -10 -25 3121.40  142.53
   1 -10  25 3131.72  128.42
  -1 -10 -25 3081.83  131.76
  -1  10 -26 1306.58   83.34
   1  10  26 1243.03   76.94
   1 -10  26 1326.06   86.27
  -1 -10 -26 1065.75  213.61
  -1 -10 -26 1082.78  118.01
  -1  10 -27   69.52   30.36
   1  10  27  143.62   37.93
   1 -10  27  107.45   26.89
  -1 -10 -27  222.47   36.10
  -1 -10 -27  135.14   19.33
   1  11 -27  314.65   85.63
  -1  11  27  408.60  108.77
  -1 -11  27  551.88   92.93
   1 -11 -27  398.59   95.66
   1  11 -26   25.51   21.76
  -1  11  26    8.48   11.33
  -1 -11  26   53.37   11.45
   1 -11 -26   24.41   18.83
   1 -11 -26   34.25   11.78
   1  11 -25  225.66   46.91
  -1  11  25  220.90   48.51
  -1 -11  25  334.58   38.59
   1 -11 -25  272.67  119.78
   1 -11 -25  196.86   46.65
   1  11 -24  658.41   71.69
  -1  11  24  595.79   70.36
  -1 -11  24  760.73   76.40
   1 -11 -24  604.58  128.97
   1 -11 -24  575.95   68.48
   1  11 -23  555.62   82.96
  -1  11  23  528.79   77.70
  -1 -11  23  533.96   47.20
   1 -11 -23  462.67   95.39
   1 -11 -23  459.72   65.99
   1  11 -22  211.49   36.67
  -1  11  22  205.01   35.93
  -1 -11  22  286.81   29.78
   1 -11 -22  153.40   39.43
   1 -11 -22  234.94   28.09
   1  11 -21    1.26    4.42
  -1  11  21   19.12    8.05
   1  11 -21    9.93    9.04
   1 -11 -21   17.62   15.40
  -1 -11  21   18.65    8.44
   1 -11 -21   31.41   12.67
   1  11 -20   37.20   12.95
  -1  11  20   56.06   12.04
   1  11 -20   58.07   18.74
   1 -11 -20   70.04   25.53
  -1 -11  20   46.97    9.64
   1 -11 -20   72.20   14.28
   1  11 -19  889.77   43.95
  -1  11  19  905.04  334.60
   1  11 -19  923.62   96.08
   1 -11 -19  872.61   73.33
  -1 -11  19 1015.25  111.99
  -1 -11  19  761.52   40.47
   1 -11 -19  799.40  103.56
   1  11 -18   -3.31    6.43
  -1  11  18   12.07    8.38
   1  11 -18   32.52   16.08
   1 -11 -18   12.57   14.72
  -1 -11  18    8.64    6.43
  -1 -11  18    3.74    4.15
   1 -11 -18    7.46   11.93
   1  11 -17 1092.62   60.69
  -1  11  17 1066.82   60.58
   1  11 -17 1108.17   81.36
   1 -11 -17  942.75  104.19
  -1 -11  17 1112.50   90.60
  -1 -11  17 1061.08   58.34
   1 -11 -17 1168.39  118.42
   1  11 -16 5021.27   49.44
  -1  11  16 4686.37  166.16
   1  11 -16 4695.56  171.85
   1 -11 -16 5243.15  177.06
  -1 -11  16 4962.49  182.82
  -1 -11  16 4853.39  172.12
   1 -11 -16 5069.97   73.08
   1  11 -15 3038.69  113.75
  -1  11  15 3257.58  107.06
   1  11 -15 2452.29  102.82
   1 -11 -15 3283.30  118.76
  -1 -11  15 3062.55  394.96
  -1 -11  15 2968.49  111.54
   1 -11 -15 3028.23  122.51
   1  11 -14  228.31   40.42
  -1  11  14  222.56   39.75
  -1  11  14  221.06   36.42
   1  11 -14  229.72   33.99
  -1 -11  14  260.61   37.14
  -1 -11  14  225.94   36.46
   1 -11 -14  271.83   39.00
   1  11 -13 5599.52  125.66
  -1  11  13 5837.63  123.08
  -1  11  13 5184.98  764.14
   1  11 -13 5573.81  116.76
   1 -11 -13 5289.91  112.16
  -1 -11  13 5777.25  123.56
  -1 -11  13 5353.03  115.21
   1 -11 -13 5735.37  138.06
  -1  11  12  229.79   34.41
   1  11 -12  216.30   23.06
  -1  11  12  253.10   40.19
   1  11 -12  283.66   34.15
   1  11 -12  272.42   40.92
   1 -11 -12  189.34   47.00
  -1 -11  12  296.50   38.04
  -1 -11  12  248.35   31.60
   1 -11 -12  272.61   40.43
  -1  11  11 2310.66  100.93
   1  11 -11 2227.13   75.06
  -1  11  11 2353.24   80.33
   1  11 -11 2272.83   81.51
  -1  11  11 2262.26   80.01
   1 -11 -11 2188.58   75.30
  -1 -11  11 2109.88   70.29
   1 -11 -11 2259.29   79.41
  -1 -11  11 2243.87   80.72
  -1 -11  11 2262.64   77.73
   1  11 -10    6.29    4.34
  -1  11  10   -9.77    8.81
   1  11 -10    6.88   12.21
  -1  11  10    9.09    6.75
  -1  11  10   -0.48   10.24
   1 -11 -10   10.05    5.02
   1 -11 -10   -0.97   10.80
  -1 -11  10   12.61    6.27
  -1 -11  10    8.02    8.72
   1  11  -9  233.29   29.54
  -1  11   9  238.21   14.75
  -1  11   9  272.57   39.82
   1  11  -9  299.73   41.66
  -1  11   9  312.63   48.07
   1  11  -9  260.92   47.56
   1 -11  -9  222.60   29.58
  -1 -11   9  228.74   42.53
  -1 -11   9  243.27   15.94
   1 -11  -9  306.19   53.23
  -1 -11   9  284.91   42.41
   1 -11  -9  236.95   35.32
   1  11  -8    6.57    4.95
  -1  11   8   13.64    4.23
   1  11  -8    9.76   13.03
   1  11  -8   -8.30   10.12
  -1  11   8   11.23    9.10
  -1  11   8   -8.90   10.99
   1 -11  -8   13.69    8.63
  -1 -11   8   24.64    7.40
  -1 -11   8    3.94    4.64
   1 -11  -8   -3.76   13.14
   1 -11  -8   10.50    7.79
  -1 -11   8    8.35    5.49
   1  11  -7  135.02   17.71
  -1  11   7  146.30   20.22
  -1  11   7  135.87   21.32
   1  11  -7  167.25   20.89
  -1  11   7  146.44   22.24
   1  11  -7  145.61   22.65
   1 -11  -7  124.79   17.96
  -1 -11   7  121.16   26.69
  -1 -11   7  143.23   18.78
   1 -11  -7  164.51   25.46
  -1 -11   7  147.38   24.24
   1 -11  -7  115.71   27.02
   1  11  -6  196.86   24.13
  -1  11   6  164.82   13.70
   1  11  -6  244.40   36.13
   1  11  -6  204.53   37.22
  -1  11   6  258.64   26.80
  -1  11   6  188.91   24.71
   1 -11  -6  217.69   28.88
  -1 -11   6  186.31   32.89
  -1 -11   6  164.84   16.25
   1 -11  -6  105.22   20.32
   1 -11  -6  193.67   24.03
  -1 -11   6  192.88   34.17
   1  11  -5 8130.68  160.46
  -1  11   5 8272.61  161.94
   1  11  -5 8611.24  177.11
   1  11  -5 8406.69  169.99
  -1  11   5 8234.77  170.98
  -1  11   5 8423.12  173.11
   1 -11  -5 8468.52  171.85
  -1 -11   5 8359.34  187.79
  -1 -11   5 8020.17  164.74
  -1 -11   5 8373.84  170.01
   1 -11  -5 8556.45  170.45
   1 -11  -5 8405.64  171.02
   1  11  -410833.15  134.51
  -1  11   410695.79 1653.14
  -1  11   410937.37  145.48
   1  11  -410906.79  138.34
  -1  11   410962.93  142.60
   1  11  -411138.10  150.12
  -1 -11   410114.37  204.03
   1 -11  -410984.67  145.49
  -1 -11   410444.21 1614.79
  -1 -11   410845.90  154.16
   1 -11  -411075.11  147.92
   1 -11  -410741.45 1660.54
  -1  11   317139.93  204.43
   1  11  -316480.94  200.97
  -1  11   316233.74  204.41
  -1  11   316082.29  211.00
   1  11  -315696.27  196.61
   1 -11  -316287.90  208.47
  -1 -11   315922.40  199.84
  -1 -11   317217.14  213.44
   1 -11  -316365.37  203.62
  -1 -11   315669.87  197.41
  -1  11   2 1964.18   60.31
   1  11  -2 2013.72   63.95
   1  11  -2 2023.17   65.58
  -1  11   2 1952.94   74.51
   1  11  -2 1988.65   74.19
   1 -11  -2 1926.28   61.70
   1 -11  -2 2014.24   69.48
  -1 -11   2 1953.38   61.45
   1 -11  -2 1916.50   63.78
  -1 -11   2 1982.69   67.90
   1 -11  -2 1990.91   65.52
  -1 -11   2 1927.43   62.29
  -1  11   1 2280.44   66.49
   1  11  -1 2328.64   75.06
   1  11  -1 2406.81   75.02
   1  11  -1 2385.64   74.95
  -1  11   1 2362.97   81.16
   1 -11  -1 2315.26   68.72
   1 -11  -1 2341.34   73.15
  -1 -11   1 2302.96   71.36
   1 -11  -1 2211.98   74.40
  -1 -11   1 2179.59   68.35
   1 -11  -1 2374.59   77.05
  -1 -11   1 2389.52   72.55
  -1  11   0  244.19   12.96
   1  11   0  261.85   20.50
   1  11   0  257.10   32.93
  -1  11   0  287.24   20.11
   1  11   0  248.26   17.58
  -1 -11   0  268.13   19.80
   1 -11   0  327.62   49.07
  -1 -11   0  243.29   18.13
   1 -11   0  246.42   13.48
  -1 -11   0  254.23   27.65
   1 -11   0  299.34   32.34
   1 -11   0  241.15   13.69
  -1  11  -1   62.26    7.56
   1  11   1   55.24   10.19
  -1  11  -1   66.07    8.84
   1  11   1   63.11   10.59
   1  11   1   64.61    9.98
  -1  11  -1   66.00   14.34
   1 -11   1   63.57   13.16
  -1 -11  -1   77.85   11.25
   1 -11   1   61.92   10.12
  -1 -11  -1   74.99   12.02
   1 -11   1   82.86   16.25
  -1 -11  -1   70.32   10.70
  -1  11  -2   53.43    6.66
   1  11   2   95.69   15.40
  -1  11  -2   79.62   11.40
   1  11   2   83.12   10.68
   1  11   2   55.01   19.03
  -1  11  -2   82.72   12.31
  -1 -11  -2   70.14    8.92
  -1 -11  -2   85.42   16.05
   1 -11   2   72.45   11.89
  -1 -11  -2  132.16   20.95
   1 -11   2  124.03   22.65
   1 -11   2   71.22   12.37
  -1  11  -3 2744.22   63.90
   1  11   3 2533.04   81.62
  -1  11  -3 2652.01   63.07
  -1  11  -3 2644.33   68.94
   1  11   3 2784.14   71.79
   1  11   3 2800.09   92.91
  -1 -11  -3 2798.24   70.24
   1 -11   3 2755.43   70.17
   1 -11   3 2709.58   71.21
  -1 -11  -3 2742.72   71.74
  -1 -11  -3 2718.12   69.63
   1 -11   3 2703.28   91.47
  -1  11  -411272.75  133.56
   1  11   410864.79  138.59
  -1  11  -411244.99  147.52
  -1  11  -411187.75  136.89
   1  11   411217.67  149.05
   1  11   410999.85  146.03
  -1 -11  -411243.76  149.19
   1 -11   411103.29  144.45
   1 -11   410497.32 1624.04
  -1 -11  -411344.29  146.71
  -1 -11  -411373.73  149.75
  -1  11  -5 3966.87   91.99
   1  11   5 3813.08   92.78
   1  11   5 4212.15  105.22
  -1  11  -5 4183.28  100.19
   1  11   5 4027.18  104.14
  -1  11  -5 4151.41  105.79
  -1  11  -5 4104.29  101.92
  -1 -11  -5 4021.61  100.44
   1 -11   5 4073.35  110.68
   1 -11   5 4115.95  106.10
  -1 -11  -5 3896.13  121.56
  -1 -11  -5 4071.94   98.71
  -1  11  -6  133.85   17.29
   1  11   6  129.10   21.30
   1  11   6  110.28   23.87
  -1  11  -6  159.40   21.17
   1  11   6  112.67   16.41
  -1  11  -6  142.56   23.92
  -1  11  -6  137.15   20.41
  -1 -11  -6   93.81   13.60
   1 -11   6  127.69   22.23
   1 -11   6  135.93   30.88
  -1 -11  -6  131.88   20.82
  -1 -11  -6  112.50   15.82
   1  11   7 4438.04  111.77
  -1  11  -7 4207.33   96.79
   1  11   7 4490.93  109.60
   1  11   7 4587.17  113.28
  -1  11  -7 4550.78  121.24
  -1  11  -7 4468.10  110.25
  -1 -11  -7 4262.11  104.28
  -1 -11  -7 4397.34  105.91
   1 -11   7 4457.24  102.31
   1 -11   7 4386.70  104.98
  -1 -11  -7 4480.66  111.05
   1 -11   7 4506.85  110.31
   1  11   8 9510.30  181.86
  -1  11  -810015.31  181.55
   1  11   810245.59  189.09
  -1  11  -8 9666.12  189.20
  -1  11  -8 9717.34  185.87
  -1 -11  -8 9788.95  181.82
  -1 -11  -8 9541.53  179.07
   1 -11   8 9491.14  192.92
   1 -11   8 9778.72  177.78
   1 -11   8 9417.81  177.06
  -1 -11  -8 9783.17  188.37
   1  11   9 6677.31  152.93
  -1  11  -9 6911.22  145.07
   1  11   9 7004.12  156.16
  -1  11  -9 6873.91  152.44
  -1  11  -9 6598.09  166.25
  -1 -11  -9 6785.23  145.61
  -1 -11  -9 5677.07  158.24
   1 -11   9 6455.51  142.39
   1 -11   9 6987.35  146.70
   1 -11   9 6736.95  144.99
  -1 -11  -9 7043.31  154.44
   1  11  10 1354.07   79.95
  -1  11 -10 1293.37   51.89
   1  11  10 1240.68   51.04
  -1  11 -10 1334.07   54.13
  -1  11 -10 1236.84   56.38
   1 -11  10 1274.89   49.01
   1 -11  10 1215.43   53.54
  -1 -11 -10 1236.61   54.57
   1 -11  10 1178.72   49.39
  -1 -11 -10 1329.25   64.73
   1  11  11 3906.25  148.48
   1  11  11 3666.83  114.58
  -1  11 -11 3976.07  123.40
  -1  11 -11 3727.14  125.13
  -1  11 -11 3903.95  125.50
  -1 -11 -11 3244.65  108.51
   1 -11  11 4047.82  124.39
   1 -11  11 3795.51  124.92
  -1 -11 -11 3695.06  131.38
   1  11  12   70.24   19.31
  -1  11 -12   14.53    5.29
   1  11  12   48.28    8.97
  -1  11 -12   56.11   16.68
  -1  11 -12   68.24   12.71
  -1 -11 -12   47.67   10.32
   1 -11  12   51.88    9.71
   1 -11  12   37.67    8.94
  -1 -11 -12   38.23   17.32
  -1  11 -13  602.95   80.14
   1  11  13  494.11   40.85
  -1  11 -13  421.55   37.60
   1  11  13  541.18   62.10
  -1  11 -13  601.48   71.84
   1 -11  13  565.02   56.20
   1 -11  13  487.85   56.65
  -1 -11 -13  637.97   84.00
  -1  11 -14 1228.14   86.27
   1  11  14 1341.23   63.06
  -1  11 -14 1234.79   76.58
   1  11  14 1301.29   81.18
  -1  11 -14 1360.67   63.36
   1 -11  14 1458.78   66.10
   1 -11  14 1199.59   77.24
  -1 -11 -14 1293.53  100.16
   1  11  15 1887.15   93.22
  -1  11 -15 1667.17   76.09
  -1  11 -15 1844.76  140.12
  -1  11 -15 1918.78   83.46
   1 -11  15 1986.22  106.73
  -1 -11 -15 1922.82  115.66
   1 -11  15 1758.94   77.05
  -1 -11 -15 1826.72   84.10
  -1  11 -16 4196.34  153.98
   1  11  16 4409.03  169.61
  -1  11 -16 4636.78  175.08
  -1 -11 -16 4297.78  192.62
   1 -11  16 4572.87  162.22
   1 -11  16 3790.89  135.68
  -1 -11 -16 4155.82  178.38
  -1  11 -17 2924.20  111.44
   1  11  17 2868.30  116.94
  -1  11 -17 2872.00  122.67
  -1 -11 -17 2735.15  121.02
   1 -11  17 3088.67  123.53
  -1 -11 -17 2983.90  118.11
  -1  11 -18  334.28   40.75
   1  11  18  357.28   58.61
  -1  11 -18  370.02   45.99
  -1 -11 -18  339.06   57.78
   1 -11  18  371.79   52.27
  -1 -11 -18  341.86   61.37
  -1  11 -19   58.69   23.68
   1  11  19  113.62   25.34
  -1  11 -19   70.21   19.06
  -1 -11 -19   64.19   17.82
   1 -11  19   84.86   20.23
  -1 -11 -19   14.67   13.05
  -1  11 -20 1800.52   86.34
   1  11  20 1894.30   86.10
  -1  11 -20 1833.89   97.05
  -1 -11 -20 1954.95   96.52
   1 -11  20 1925.57  122.26
  -1 -11 -20 1833.49  143.17
  -1  11 -21   16.84   11.79
   1  11  21   25.18   11.29
  -1  11 -21   55.96   24.48
  -1 -11 -21   32.40   16.74
   1 -11  21   42.13   15.52
  -1 -11 -21   17.74    9.05
  -1  11 -22    2.99    5.56
   1  11  22   22.11    9.27
  -1  11 -22   25.37   19.73
  -1 -11 -22   25.36   15.52
   1 -11  22   13.99   11.23
  -1 -11 -22   30.27   11.29
  -1  11 -23 2614.74  108.37
   1  11  23 2487.57  105.78
  -1  11 -23 2767.81  126.24
  -1 -11 -23 2913.97  130.97
   1 -11  23 2886.08  121.23
  -1 -11 -23 2786.03  120.69
  -1  11 -24  875.21   42.94
   1  11  24  891.76   61.36
  -1  11 -24  808.98   78.63
  -1 -11 -24  913.57  160.12
   1 -11  24  890.84   85.84
  -1 -11 -24  882.22   92.24
  -1  11 -25    4.99    7.80
   1  11  25    3.16    8.46
  -1  11 -25   16.60   15.25
  -1 -11 -25   49.36   17.56
   1 -11  25   -0.64   14.67
  -1 -11 -25   23.09   11.52
  -1  11 -26  404.40   87.42
   1  11  26  425.83   72.94
   1 -11  26  452.06   66.89
  -1 -11 -26  366.02   84.66
  -1 -11 -26  259.83   69.52
   1  11  27    7.15   12.12
  -1  11 -27   30.34   16.35
  -1 -11 -27    1.22   17.81
  -1 -11 -27   15.00   10.62
   1  12 -26  949.57   96.97
  -1  12  26  903.84   85.58
  -1 -12  26  961.94  116.45
   1 -12 -26  698.67  164.97
   1 -12 -26  768.81  119.06
  -1  12  25  798.32   85.94
  -1 -12  25  934.45  102.21
   1 -12 -25  959.35  112.79
   1 -12 -25  793.01  115.76
   1  12 -24   57.93   15.52
  -1  12  24   20.68   12.10
  -1 -12  24   19.49   10.13
   1 -12 -24   13.71   14.95
   1 -12 -24   40.88   14.28
   1  12 -23  698.05  127.34
  -1  12  23  656.81   76.46
  -1 -12  23  729.08   69.73
   1 -12 -23  733.14  100.12
   1 -12 -23  545.30   97.80
   1  12 -22   50.19   13.76
  -1  12  22   79.10   18.58
   1  12 -22  104.79   20.28
   1 -12 -22  143.76   28.96
  -1 -12  22  109.97   15.60
   1 -12 -22   65.37   16.61
   1  12 -21 1309.32   40.89
  -1  12  21 1516.69   44.17
   1  12 -21 1563.40   57.43
   1 -12 -21 1631.53  173.08
  -1 -12  21 1558.95  102.72
   1 -12 -21 1288.85  138.52
   1  12 -20  143.44   43.48
  -1  12  20  191.57   33.69
   1  12 -20  247.24   37.69
   1 -12 -20  212.78   32.81
  -1 -12  20  279.35   34.20
   1 -12 -20  171.56   37.59
   1  12 -19 1118.05   60.11
  -1  12  19 1197.37   72.56
   1  12 -19 1291.47  158.06
   1 -12 -19 1159.41  157.58
  -1 -12  19 1179.86  100.06
   1 -12 -19 1216.29  101.06
   1  12 -18   69.24   14.69
  -1  12  18   73.42   14.79
   1  12 -18   31.71   14.61
   1 -12 -18   33.60   20.97
  -1 -12  18   38.63   12.66
   1 -12 -18   57.62   27.07
   1  12 -17 1610.69   75.10
  -1  12  17 1533.99   76.63
   1  12 -17 1860.92  167.57
   1 -12 -17 1349.41   99.22
  -1 -12  17 1633.18   94.08
   1 -12 -17 1510.26   96.00
   1  12 -16  111.30   25.49
  -1  12  16  117.19   28.61
   1  12 -16  147.77   30.26
   1 -12 -16   97.02   30.11
  -1 -12  16  123.01   24.81
  -1 -12  16   99.83   24.59
   1 -12 -16  143.02   31.28
   1  12 -15  162.20   30.30
  -1  12  15  161.74   32.02
   1  12 -15  143.81   29.07
  -1 -12  15  177.29   19.10
   1 -12 -15  138.73   33.46
  -1  12  14 7795.69  218.16
  -1  12  14 8149.42  224.57
   1  12 -14 7376.76  212.12
  -1 -12  14 8417.82  230.50
   1 -12 -14 8584.34  245.70
   1  12 -13 5905.85  208.48
   1  12 -13 5452.92  156.83
  -1  12  13 6326.47  175.72
  -1  12  13 6168.22  179.42
  -1 -12  13 6087.47  167.57
   1 -12 -13 6111.57  186.15
  -1 -12  13 6043.39  167.25
  -1  12  12   29.08   10.82
   1  12 -12    5.74    6.53
  -1  12  12   27.35   10.19
   1  12 -12   30.43   10.91
  -1 -12  12   26.82    8.04
   1 -12 -12   25.87   10.30
  -1 -12  12   27.25    5.55
   1 -12 -12   25.26   12.50
  -1 -12  12   11.67    7.13
   1  12 -11  955.89   52.04
  -1  12  11  916.75   50.02
  -1  12  11 1027.72   70.72
   1  12 -11  969.36   46.37
   1  12 -11  931.04   50.42
   1 -12 -11  926.35   40.67
  -1 -12  11 1017.58   43.65
   1 -12 -11  939.72   67.86
  -1 -12  11  996.10   52.31
   1  12 -10 2478.61   87.12
  -1  12  10 2568.99   93.75
  -1  12  10 2510.15  105.41
   1  12 -10 2543.96  102.02
   1  12 -10 2574.43  104.25
   1 -12 -10 2459.10   83.69
  -1 -12  10 2539.38   89.82
   1 -12 -10 2548.38  104.85
  -1 -12  10 2584.21   90.28
   1  12  -9    9.66    2.97
  -1  12   9   14.44    7.06
  -1  12   9   16.88    9.47
   1  12  -9   31.55   15.89
  -1  12   9   18.46    9.16
   1  12  -9   15.11    9.63
   1 -12  -9    6.79    6.30
   1 -12  -9   30.18   10.48
  -1 -12   9    9.49    5.83
  -1 -12   9   16.95    9.47
   1  12  -8 2649.44   90.54
  -1  12   8 2732.81   93.77
   1  12  -8 2845.21   53.32
   1  12  -8 2683.79   99.54
  -1  12   8 2675.51  105.60
  -1  12   8 2480.09   86.84
   1 -12  -8 2477.49   86.08
  -1 -12   8 2704.54   88.99
   1 -12  -8 2790.52   95.99
  -1 -12   8 2695.08   98.42
   1 -12  -8 2728.55   99.67
   1  12  -7  394.29   35.04
  -1  12   7  326.44   26.59
   1  12  -7  444.18   65.64
   1  12  -7  401.44   55.37
  -1  12   7  322.93   59.46
  -1  12   7  324.69   51.07
   1 -12  -7  327.27   40.14
  -1 -12   7  357.08   46.84
  -1 -12   7  354.12   34.90
   1 -12  -7  508.71   64.92
   1 -12  -7  342.31   31.93
  -1 -12   7  457.00   59.91
   1  12  -614520.72  263.63
  -1  12   614272.32  255.49
   1  12  -614870.62  275.10
   1  12  -614690.59  268.49
  -1  12   614426.60  278.80
  -1  12   613707.18  258.38
   1 -12  -614533.58  270.22
  -1 -12   614089.94  262.42
  -1 -12   614021.40  254.02
   1 -12  -614015.59  277.08
   1 -12  -614919.68  270.73
  -1 -12   614644.35  268.65
   1  12  -512999.18  236.44
  -1  12   512580.71  228.15
  -1  12   513256.65  246.06
   1  12  -513288.57  245.28
  -1  12   512972.97  244.73
   1  12  -513589.38  254.41
   1 -12  -513131.62  243.47
  -1 -12   512772.18  243.40
  -1 -12   512768.79  232.82
  -1 -12   513116.55  240.90
   1 -12  -513509.76  254.90
   1 -12  -513294.27  240.06
   1  12  -4 1410.86   45.64
  -1  12   4 1330.13   42.70
  -1  12   4 1401.19   55.48
   1  12  -4 1402.57   49.57
  -1  12   4 1429.63   52.09
   1  12  -4 1586.45   66.17
   1 -12  -4 1409.68   51.85
  -1 -12   4 1314.00   47.53
  -1 -12   4 1504.03   67.35
  -1 -12   4 1340.47   49.87
   1 -12  -4 1440.03   52.36
   1 -12  -4 1418.03   46.23
   1  12  -3 3723.04   88.31
  -1  12   3 3855.42   89.95
   1  12  -3 3764.06   91.75
  -1  12   3 3669.97   93.85
   1  12  -3 3834.23  120.97
   1 -12  -3 3843.78   90.67
   1 -12  -3 3615.15   98.44
  -1 -12   3 3692.61   92.28
  -1 -12   3 3756.67   90.46
  -1 -12   3 3858.97   96.08
   1 -12  -3 3874.89   97.72
  -1  12   2 1540.08   45.81
   1  12  -2 1620.50   53.72
  -1  12   2 1603.67   61.05
   1  12  -2 1626.83   55.75
   1 -12  -2 1631.05   56.22
  -1 -12   2 1702.56   53.29
   1 -12  -2 1595.08   52.57
  -1 -12   2 1660.54   54.57
  -1 -12   2 1586.30   55.80
   1 -12  -2 1635.71   52.22
   1 -12  -2 1713.29   58.06
  -1 -12   2 1732.41   59.24
  -1  12   1 8361.04  161.98
   1  12  -1 8441.44  169.81
   1  12  -1 8211.50  167.85
  -1  12   1 8286.27  170.62
   1  12  -1 8326.80  171.17
  -1 -12   1 8102.65  163.20
   1 -12  -1 7972.32  162.13
  -1 -12   1 8047.31  163.99
   1 -12  -1 8059.65  162.17
   1 -12  -1 8373.89  172.30
  -1 -12   1 8133.93  165.34
   1 -12  -1 8238.36  160.84
  -1  12   0 1835.40   54.52
   1  12   0 1820.27   62.91
   1  12   0 1820.94   58.99
  -1  12   0 1882.62   61.65
   1  12   0 1862.05   61.35
   1 -12   0 1836.70   54.60
  -1 -12   0 1873.38   60.64
  -1 -12   0 1788.23   58.94
   1 -12   0 1880.78   59.57
  -1 -12   0 1780.13   60.60
   1 -12   0 1930.96   62.47
   1 -12   0 1782.63   59.72
  -1  12  -1 1116.15   36.34
  -1  12  -1 1160.48   38.81
   1  12   1 1128.58   41.73
   1  12   1 1097.96   43.35
   1  12   1 1179.02   45.47
  -1  12  -1 1125.26   43.14
  -1 -12  -1 1111.67   41.81
  -1 -12  -1 1095.01   39.66
   1 -12   1 1205.14   47.36
  -1 -12  -1 1077.03   47.78
   1 -12   1 1055.36   46.10
   1 -12   1 1162.59   43.77
  -1  12  -2  716.91   24.98
   1  12   2  694.39   35.64
  -1  12  -2  716.67   28.26
   1  12   2  635.22   33.55
  -1  12  -2  718.59   42.28
   1  12   2  817.76   38.94
  -1 -12  -2  727.47   28.24
  -1 -12  -2  756.08   46.45
   1 -12   2  732.49   31.27
  -1 -12  -2  749.15   51.55
   1 -12   2  735.01   29.29
   1 -12   2  824.82   53.11
  -1  12  -3  266.37   11.17
   1  12   3  299.23   30.24
   1  12   3  320.18   35.16
  -1  12  -3  333.39   22.44
   1  12   3  308.58   19.88
  -1  12  -3  263.14   19.80
  -1 -12  -3  270.81   40.37
   1 -12   3  289.64   21.00
   1 -12   3  269.26   16.29
  -1 -12  -3  361.07   57.80
  -1 -12  -3  273.32   39.97
   1 -12   3  311.95   57.43
  -1  12  -4   18.01    4.13
   1  12   4    9.22    8.05
   1  12   4   12.36   11.51
  -1  12  -4   32.11    7.51
   1  12   4   39.81   15.16
  -1  12  -4   24.83    7.44
  -1 -12  -4   13.04    7.61
   1 -12   4   20.70    6.84
   1 -12   4   30.48    7.46
  -1 -12  -4    8.22    8.82
  -1 -12  -4   16.99    7.88
   1 -12   4   45.84   12.63
  -1  12  -5  226.49   13.12
   1  12   5  223.43   15.18
  -1  12  -5  292.47   41.76
  -1  12  -5  279.86   24.40
   1  12   5  280.87   42.22
   1  12   5  263.20   40.04
  -1 -12  -5  275.73   65.50
   1 -12   5  266.04   39.84
   1 -12   5  259.11   35.75
  -1 -12  -5  303.52   47.24
  -1 -12  -5  250.79   15.44
   1 -12   5  279.44   48.24
  -1  12  -6 5471.60  125.39
   1  12   6 5649.86  132.69
  -1  12  -6 5790.92  981.04
  -1  12  -6 5661.03  131.35
   1  12   6 5524.25  132.84
   1  12   6 5604.96  134.72
  -1  12  -6 5648.12  133.52
  -1 -12  -6 5645.94  134.99
   1 -12   6 5627.45  137.96
   1 -12   6 5581.11  132.61
  -1 -12  -6 5447.76  133.24
  -1  12  -716988.12  345.87
   1 -12   717080.66  354.77
   1  12   8  581.39   49.38
  -1  12  -8  553.12   30.18
   1  12   8  502.99   16.35
   1  12   8  543.38   45.27
  -1  12  -8  566.50   37.27
  -1  12  -8  576.77   54.95
  -1 -12  -8  560.40   39.80
  -1 -12  -8  528.56   34.41
   1 -12   8  478.94   26.22
   1 -12   8  566.69   38.47
  -1 -12  -8  619.37   43.54
   1 -12   8  572.09   36.67
   1  12   9 1223.82   53.25
  -1  12  -9 1342.18   50.97
   1  12   9 1226.11   50.18
  -1  12  -9 1298.22   60.05
  -1  12  -9 1300.14   51.84
  -1 -12  -9 1226.77   51.06
   1 -12   9 1232.39   48.71
   1 -12   9 1240.32   49.75
  -1 -12  -9 1281.76   56.32
  -1  12 -10  305.59   47.85
   1  12  10  320.81   45.24
  -1  12 -10  255.41   30.88
   1  12  10  318.46   38.93
  -1  12 -10  321.49   43.49
   1 -12  10  251.14   22.78
   1 -12  10  256.75   39.40
  -1 -12 -10  304.48   33.07
   1  12  11    9.27    7.68
  -1  12 -11    8.85    5.51
   1  12  11   17.15    7.56
  -1  12 -11   11.79    8.77
  -1  12 -11   48.51   11.38
  -1 -12 -11   11.60    6.61
   1 -12  11   23.95    5.44
   1 -12  11   42.05   10.14
  -1 -12 -11   21.79    7.72
  -1  12 -12  205.91   36.29
  -1  12 -12  161.27   31.83
   1  12  12  277.17   42.10
   1  12  12  236.61   32.74
  -1  12 -12  243.40   34.88
   1 -12  12  222.06   22.65
   1 -12  12  210.18   26.89
  -1 -12 -12  220.04   26.14
  -1  12 -13 1196.00   75.53
   1  12  13 1171.44   75.42
   1  12  13 1173.62   88.50
  -1  12 -13 1105.88   81.67
   1 -12  13 1163.39   83.99
   1 -12  13 1117.84   70.40
  -1 -12 -13 1262.12  168.54
  -1  12 -14 3995.58  160.19
  -1  12 -14 4065.49  130.43
   1  12  14 4370.44  141.90
   1  12  14 4173.91  141.19
  -1  12 -14 4276.95  139.44
   1 -12  14 4529.41  145.94
   1 -12  14 3815.03  122.72
  -1 -12 -14 4407.96  145.89
  -1  12 -15 1646.92   93.08
   1  12  15 1683.76   91.84
  -1  12 -15 1379.95   73.97
   1  12  15 1618.39   93.47
  -1  12 -15 1642.49   89.86
   1 -12  15 1767.33   97.69
   1 -12  15 1438.65   79.41
  -1 -12 -15 1551.82   89.18
  -1  12 -16 1033.75   92.94
   1  12  16  850.35   76.56
  -1  12 -16 1009.30   91.90
  -1 -12 -16 1005.06  145.67
   1 -12  16  976.85   57.78
  -1 -12 -16  909.70   56.51
  -1  12 -17    8.46    7.50
   1  12  17  -18.49   12.99
  -1  12 -17   10.50   13.49
  -1 -12 -17   21.39   17.18
   1 -12  17    7.27    5.03
  -1 -12 -17   23.92   12.48
  -1  12 -18   29.88    9.12
   1  12  18   26.83   11.82
  -1  12 -18   23.43   11.46
  -1 -12 -18   50.17   20.80
   1 -12  18   45.47   16.30
  -1 -12 -18   44.18   13.07
  -1  12 -19 4076.48  163.21
   1  12  19 4297.61  171.52
  -1  12 -19 4047.75  168.06
  -1 -12 -19 3885.66  167.23
   1 -12  19 4281.43  169.53
  -1 -12 -19 4012.24  162.41
  -1  12 -20  138.71   26.05
   1  12  20  178.46   25.74
  -1  12 -20  138.79   27.50
  -1 -12 -20  135.85   27.97
   1 -12  20  180.06   22.48
  -1 -12 -20  135.07   20.95
  -1  12 -21  921.88   34.42
   1  12  21  836.58   84.21
  -1  12 -21  949.89  117.31
  -1 -12 -21  953.41  113.38
   1 -12  21  966.47   83.14
  -1 -12 -21  975.33   96.67
  -1  12 -22 2604.64  112.12
   1  12  22 3005.00  140.08
  -1  12 -22 2628.66  238.17
  -1 -12 -22 2917.06  259.99
   1 -12  22 2983.82  130.48
  -1 -12 -22 2829.19  126.28
  -1  12 -23  114.74   30.70
   1  12  23  193.23   41.34
  -1  12 -23  192.32   47.38
  -1 -12 -23  211.77   46.27
   1 -12  23  201.95   45.27
  -1 -12 -23  221.06   40.97
  -1  12 -24  561.11   27.62
   1  12  24  416.16   98.73
  -1  12 -24  487.05  135.53
  -1 -12 -24  356.08  102.74
   1 -12  24  585.59   68.99
  -1 -12 -24  469.45   96.59
  -1  12 -25  140.04   35.47
   1  12  25  146.05   35.52
   1 -12  25  111.95   32.12
  -1 -12 -25  131.48   35.93
  -1 -12 -25  129.86   31.21
  -1  12 -26   68.25   23.39
   1  12  26   66.38   21.13
   1 -12  26   52.55   18.86
  -1 -12 -26   68.64   30.31
   1  13 -26   34.33   20.34
  -1  13  26   32.90   18.24
  -1 -13  26   32.90   14.71
   1 -13 -26   61.39   24.99
   1 -13 -26   24.09    8.11
   1  13 -25   29.56   24.19
  -1  13  25   15.36    6.98
  -1 -13  25   32.41    8.32
   1 -13 -25   10.49   25.37
   1 -13 -25   21.66   13.92
   1  13 -24 1079.75  107.29
  -1  13  24 1085.17   90.72
  -1 -13  24 1060.00  115.07
   1 -13 -24  625.19  168.17
   1 -13 -24  786.30  124.11
   1  13 -23 1532.54  129.33
  -1  13  23 1603.17   81.82
  -1 -13  23 1721.16  108.87
   1 -13 -23 1408.31  178.96
   1 -13 -23 1642.08   85.15
   1  13 -22  104.85   28.26
  -1  13  22  160.02   28.51
   1  13 -22  229.42   35.90
   1 -13 -22  217.10   39.91
  -1 -13  22  223.91   25.70
   1 -13 -22  157.94   30.59
   1  13 -21   35.34   10.48
  -1  13  21   53.59   17.01
   1  13 -21   73.76   27.83
   1 -13 -21   84.30   31.27
  -1 -13  21   78.07   14.06
   1 -13 -21   45.66   16.90
   1  13 -20   40.73   12.65
  -1  13  20   54.55   15.40
   1  13 -20   81.24   19.42
   1 -13 -20   52.56   22.98
  -1 -13  20   74.15   14.40
   1 -13 -20   70.08   15.17
   1  13 -19 1847.22   77.45
  -1  13  19 1975.87   88.67
   1  13 -19 1863.01  145.23
   1 -13 -19 1904.31  165.60
  -1 -13  19 1909.71   82.78
   1 -13 -19 1848.68   82.74
   1  13 -18 1275.20   62.62
  -1  13  18 1251.05   72.69
   1  13 -18 1484.21  167.43
   1 -13 -18  955.19   72.58
  -1 -13  18 1466.85  109.34
   1 -13 -18 1289.82   68.48
   1  13 -17  927.98   78.12
  -1  13  17  736.34   54.30
  -1 -13  17  856.24   97.83
   1 -13 -17  778.03  313.66
  -1 -13  17  738.08   52.39
   1 -13 -17  823.31   87.89
   1  13 -16  970.55   97.49
  -1  13  16  945.06   59.65
  -1 -13  16 1094.33  105.05
   1 -13 -16 1192.36  210.08
  -1 -13  16  880.06   50.13
   1 -13 -16 1068.71  117.58
  -1 -13  16 1020.38   66.72
   1  13 -15 4274.81  167.95
  -1  13  15 5437.42  181.28
  -1 -13  15 5402.48  185.10
  -1 -13  15 5066.76  166.75
   1 -13 -15 5388.00  182.01
  -1 -13  15 5305.84  175.91
  -1  13  14 1679.57  136.37
  -1  13  14 1723.76   75.03
   1  13 -14 1472.35  101.01
  -1 -13  14 1692.72   30.91
  -1 -13  14 1593.24   87.99
   1 -13 -14 1849.18   84.88
  -1 -13  14 1666.43  101.28
   1  13 -13   73.20   16.54
  -1  13  13  105.27   23.51
   1  13 -13  116.74   21.95
  -1  13  13   89.86   24.42
   1 -13 -13   58.82   15.43
  -1 -13  13   81.88   16.79
   1 -13 -13  165.71   25.81
  -1 -13  13  108.87   24.17
   1  13 -12 1130.36   74.35
  -1  13  12 1286.24  168.04
  -1  13  12 1298.24   88.37
   1  13 -12 1248.94   95.46
   1  13 -12 1264.14  177.59
   1 -13 -12 1120.36   70.99
  -1 -13  12 1181.12   73.63
   1 -13 -12 1208.51   82.26
  -1 -13  12 1305.88   59.58
   1  13 -11 1898.55   79.91
  -1  13  11 2040.23   78.63
  -1  13  11 1925.91   99.18
   1  13 -11 1995.64   83.34
   1  13 -11 1949.72   83.37
   1 -13 -11 1886.65   73.17
  -1 -13  11 1862.35   78.10
   1 -13 -11 2014.29   81.80
  -1 -13  11 1918.68   75.69
   1  13 -10   10.59    7.49
  -1  13  10   38.96    7.46
  -1  13  10   17.90    8.60
   1  13 -10   25.22   10.75
   1  13 -10   17.56   13.22
   1 -13 -10   19.05   11.39
  -1 -13  10   31.54    5.46
   1 -13 -10   33.32   11.73
  -1 -13  10   57.46   12.55
   1  13  -9  142.69   24.74
  -1  13   9  172.59   32.78
  -1  13   9  173.60   32.44
   1  13  -9  211.23   25.49
   1  13  -9  189.32   43.47
   1 -13  -9  142.05   26.22
  -1 -13   9  178.59   25.26
   1 -13  -9  198.72   26.56
  -1 -13   9  174.50   23.36
   1  13  -8 1657.26   57.06
  -1  13   8 1568.16   64.87
  -1  13   8 1669.55   63.37
   1  13  -8 1648.85   65.15
   1  13  -8 1659.89   62.58
   1 -13  -8 1654.42   60.11
  -1 -13   8 1716.94   60.15
   1 -13  -8 1575.16   74.29
  -1 -13   8 1605.62   78.76
   1  13  -7 9873.19  209.28
  -1  13   710197.92  211.81
  -1  13   710203.87  225.22
   1  13  -7 9868.57  209.24
   1  13  -710586.39  234.51
   1 -13  -7 9636.82  201.30
  -1 -13   7 9599.63  201.88
   1 -13  -7 9949.75  215.03
  -1 -13   710098.51  215.78
   1  13  -6  424.59   31.53
  -1  13   6  308.62   16.57
  -1  13   6  366.87   49.04
   1  13  -6  435.78   23.60
  -1  13   6  373.28   47.93
   1  13  -6  401.94   28.83
   1 -13  -6  393.55   43.64
  -1 -13   6  377.16   33.69
  -1 -13   6  356.71   29.14
   1 -13  -6  466.73   75.71
  -1 -13   6  409.72   32.51
   1 -13  -6  356.52   17.24
   1  13  -5  401.51   22.81
  -1  13   5  388.27   17.36
  -1  13   5  423.70   24.79
   1  13  -5  400.15   32.35
  -1  13   5  423.47   28.37
   1  13  -5  483.56   59.84
   1 -13  -5  409.31   53.33
  -1 -13   5  470.02   41.97
  -1 -13   5  486.42   43.17
   1 -13  -5  450.02   46.39
  -1 -13   5  482.16   60.27
   1 -13  -5  417.46   20.90
   1  13  -4 4386.66  102.32
  -1  13   4 4163.51   96.95
   1  13  -4 4377.45  105.28
   1  13  -4 4307.37  107.43
  -1  13   4 4232.14  115.40
   1 -13  -4 4504.57  105.74
  -1 -13   4 4182.01  104.24
  -1 -13   4 4165.27  106.07
  -1 -13   4 4419.63  110.50
   1 -13  -4 4497.64  118.15
   1  13  -316230.51  289.37
   1  13  -316999.45  308.11
   1  13  -316852.88  310.84
  -1  13   316294.44  303.67
   1 -13  -317188.94  309.10
   1 -13  -316896.44  309.01
  -1 -13   316281.42  300.86
   1 -13  -315182.60  274.79
  -1 -13   315946.19  294.91
  -1 -13   317310.65  317.12
  -1  13   2 6994.66  127.74
   1  13  -2 6881.19  129.28
  -1  13   2 6988.38  140.06
   1  13  -2 6822.32  151.78
   1 -13  -2 6615.07  121.70
  -1 -13   2 6956.33  131.20
   1 -13  -2 6718.95  131.10
  -1 -13   2 6539.02  134.81
   1 -13  -2 6346.48  125.17
  -1 -13   2 6634.50  125.33
   1 -13  -2 6935.92  136.97
  -1 -13   2 6973.63  136.43
  -1  13   1 1277.41   41.79
   1  13  -1 1273.63   46.74
   1  13  -1 1226.47   51.39
  -1  13   1 1326.69   48.97
   1  13  -1 1248.16   59.86
   1 -13  -1 1340.43   42.75
  -1 -13   1 1079.94   50.76
   1 -13  -1 1294.03   46.83
   1 -13  -1 1290.39   44.47
  -1 -13   1 1307.33   47.62
  -1 -13   1 1293.18   45.79
  -1  13   0  464.73   21.65
   1  13   0  434.82   23.69
   1  13   0  460.26   26.19
  -1  13   0  473.75   30.92
   1  13   0  501.29   28.26
  -1 -13   0  477.29   23.92
   1 -13   0  424.52   37.75
  -1 -13   0  493.16   29.63
   1 -13   0  479.05   48.36
  -1 -13   0  568.44   62.30
   1 -13   0  445.29   39.83
   1 -13   0  499.68   24.79
  -1  13  -1 1399.70   44.47
  -1  13  -1 1479.18   48.19
   1  13   1 1474.64   50.13
   1  13   1 1404.40   55.32
  -1  13  -1 1408.99   58.49
   1  13   1 1533.77  264.26
  -1 -13  -1 1429.99   51.65
  -1 -13  -1 1492.48   54.09
   1 -13   1 1441.56   57.69
  -1 -13  -1 1393.19   49.51
   1 -13   1 1432.90   51.76
   1 -13   1 1410.61   50.13
  -1  13  -2 2164.82   68.24
   1  13   2 2120.24   77.00
  -1  13  -2 2105.42   67.81
   1  13   2 2119.18   73.95
   1  13   2 2100.92   72.48
  -1  13  -2 2117.33   75.52
  -1 -13  -2 2114.61   72.29
  -1 -13  -2 1965.38   68.05
   1 -13   2 2092.26   70.72
  -1 -13  -2 2020.77   71.49
   1 -13   2 2105.02   74.80
   1 -13   2 2293.37   78.75
  -1  13  -3   54.82   12.09
   1  13   3   86.27   12.88
  -1  13  -3   76.03    9.49
   1  13   3   59.42   14.83
   1  13   3   85.82   20.58
  -1  13  -3   93.80   17.66
  -1 -13  -3   57.85   14.02
  -1 -13  -3   62.96   19.27
   1 -13   3   76.82   12.04
  -1 -13  -3   69.43   17.27
   1 -13   3   80.73   14.62
   1 -13   3   83.47   13.39
  -1  13  -4 3419.80   78.59
   1  13   4 3386.67   82.75
  -1  13  -4 3377.77   79.99
  -1  13  -4 3462.29   88.40
   1  13   4 3443.19   89.75
   1  13   4 3271.02   83.06
  -1 -13  -4 3355.99   81.54
   1 -13   4 3354.17   84.58
   1 -13   4 3105.07   92.34
  -1 -13  -4 3252.07  109.52
  -1 -13  -4 3286.02   82.98
   1 -13   4 3244.34   82.99
  -1  13  -5 4263.30  111.99
   1  13   5 4216.06  115.00
   1  13   5 4485.15  129.07
  -1  13  -5 4319.52  116.97
  -1  13  -5 4238.67  120.02
   1  13   5 4394.61  122.83
  -1 -13  -5 4471.91  121.67
   1 -13   5 4283.36  123.14
  -1 -13  -5 4369.14  122.93
   1 -13   5 4302.87  117.19
   1 -13   5 4444.81  137.65
  -1  13  -6 5954.34  156.87
   1  13   6 6186.86  132.49
   1  13   6 6205.19  138.01
  -1  13  -6 6112.56   47.62
  -1  13  -6 6276.16  150.46
  -1 -13  -6 6352.40  140.04
   1 -13   6 5592.09  154.02
   1 -13   6 6070.64   55.35
  -1 -13  -6 6341.68  141.83
   1 -13   6 6210.62  140.95
  -1  13  -7   14.28    4.15
   1  13   7   -9.57    8.25
  -1  13  -7    8.67    6.22
  -1  13  -7    2.06    3.55
   1  13   7  -16.83   15.75
  -1  13  -7   -7.36    9.74
  -1 -13  -7    4.49   10.38
   1 -13   7    9.72    6.11
  -1 -13  -7    5.26   10.95
   1 -13   7    4.52    5.41
  -1 -13  -7   11.95   10.82
  -1  13  -8  245.26   23.61
   1  13   8  312.71   38.61
  -1  13  -8  270.15   33.82
  -1  13  -8  225.53   19.78
   1  13   8  322.03   49.54
  -1  13  -8  308.70   39.21
  -1 -13  -8  193.73   33.13
   1 -13   8  228.23   16.18
  -1 -13  -8  325.13   42.74
  -1  13  -9 6474.64  128.17
   1  13   9 6716.95  139.98
  -1  13  -9 6475.68  134.08
  -1  13  -9 5923.28  125.95
  -1 -13  -9 6102.65  131.96
   1 -13   9 5990.79  124.25
  -1 -13  -9 6587.32  142.17
   1  13  10  109.72   21.27
  -1  13 -10   81.46   13.10
   1  13  10  117.20   20.63
  -1  13 -10  139.89   24.28
  -1  13 -10  122.92   20.51
  -1 -13 -10   61.87   16.55
   1 -13  10  118.75   21.22
   1 -13  10   96.44   18.05
  -1 -13 -10   91.15   18.71
   1  13  11 2802.26  414.11
  -1  13 -11 2824.04  416.22
   1  13  11 2758.94  109.84
  -1  13 -11 2720.28  115.54
  -1  13 -11 2908.20   93.72
  -1 -13 -11 2726.59  106.97
   1 -13  11 2861.08  422.32
   1 -13  11 2553.32   97.69
  -1 -13 -11 2808.46  417.10
  -1  13 -12 5666.54  163.95
  -1  13 -12 5597.42  155.09
   1  13  12 5504.70  165.80
   1  13  12 5627.98  159.93
  -1  13 -12 5765.70  160.97
   1 -13  12 5830.71  160.83
   1 -13  12 5173.93  143.71
  -1 -13 -12 5952.51  170.23
  -1  13 -13  259.13   51.15
  -1  13 -13  169.01   30.57
   1  13  13  275.29   47.28
   1  13  13  234.38   36.15
  -1  13 -13  262.06   47.56
   1 -13  13  288.21   45.81
   1 -13  13  197.32   39.46
  -1 -13 -13  247.27   44.70
  -1  13 -14   15.06   10.79
   1  13  14   -0.54   12.38
  -1  13 -14    8.14    5.96
   1  13  14   10.79    7.64
  -1  13 -14    6.35    6.47
   1 -13  14   17.28   10.04
  -1 -13 -14    3.10   13.36
  -1  13 -15  663.26   63.85
   1  13  15  625.58   43.56
   1  13  15  565.22   76.36
  -1  13 -15  625.14   83.42
   1 -13  15  589.28   52.80
  -1 -13 -15  657.60   78.50
  -1  13 -16  156.08   32.77
   1  13  16  135.71   28.17
  -1  13 -16  137.47   27.92
   1 -13  16  144.63   27.39
  -1 -13 -16  149.23   35.90
  -1  13 -17 3152.41  132.03
   1  13  17 3116.43  141.69
  -1  13 -17 3004.70  147.82
  -1 -13 -17 3163.98  159.40
   1 -13  17 3190.90  134.40
  -1 -13 -17 3067.98  130.91
  -1  13 -18  762.37   76.06
   1  13  18  780.92   43.54
  -1  13 -18  985.15  133.33
  -1 -13 -18  775.52  104.29
   1 -13  18  898.63  336.32
  -1 -13 -18  810.70   82.66
  -1  13 -19  383.36   59.71
   1  13  19  458.46   77.77
  -1  13 -19  478.97  114.44
  -1 -13 -19  450.77   77.53
   1 -13  19  440.45   45.37
  -1 -13 -19  443.84   69.73
  -1  13 -20  193.16   42.40
   1  13  20  251.99   37.18
  -1  13 -20  222.98   42.09
  -1 -13 -20  217.01   53.29
   1 -13  20  200.44   35.24
  -1 -13 -20  208.90   36.52
  -1  13 -21  660.15   32.12
   1  13  21  713.63   60.77
  -1  13 -21  611.29   90.41
  -1 -13 -21  765.84  103.54
   1 -13  21  707.78   57.91
  -1 -13 -21  648.59   74.90
  -1  13 -22   56.64   21.33
   1  13  22   51.85   19.02
   1 -13  22   32.59   12.95
  -1 -13 -22   37.64   16.45
  -1 -13 -22   42.62   17.03
  -1  13 -23  211.44   58.44
   1  13  23  287.85   62.53
  -1  13 -23  463.10   83.25
  -1 -13 -23  302.88   53.47
   1 -13  23  290.81   67.84
  -1 -13 -23  372.50   70.38
  -1  13 -24 1554.45   83.71
   1  13  24 1822.54   99.44
  -1  13 -24 1603.86  103.88
  -1 -13 -24 1580.30  117.54
   1 -13  24 1865.32   99.64
  -1 -13 -24 1685.83   93.44
  -1  13 -25   38.28   22.72
   1  13  25   83.24   43.57
   1 -13  25   23.26   14.61
  -1 -13 -25   73.10   31.45
  -1 -13 -25   69.60   23.37
  -1  13 -26   33.89   20.29
   1  13  26   14.31    9.03
   1 -13  26   19.81   12.04
  -1 -13 -26   11.71   21.14
   1  14 -25 2530.47  130.15
  -1  14  25 2522.02  120.01
  -1 -14  25 2707.42  128.94
   1 -14 -25 2568.17  131.38
   1 -14 -25 2355.82  119.81
   1  14 -24  682.11  158.95
  -1  14  24  731.76   71.13
  -1 -14  24  815.61  101.40
   1 -14 -24  700.89  153.75
   1 -14 -24  775.07  101.19
   1  14 -23  317.06   56.07
  -1  14  23  223.28   55.37
  -1 -14  23  373.42   50.46
   1 -14 -23  299.06   53.46
   1 -14 -23  232.86   45.52
   1  14 -22  171.28   38.71
  -1  14  22  178.34   39.55
  -1 -14  22  266.47   29.22
   1 -14 -22  262.96   48.80
   1 -14 -22  219.83   33.99
   1  14 -21 2018.57   85.46
  -1  14  21 2034.18   77.67
  -1 -14  21 2153.54   85.99
   1 -14 -21 2086.64   89.81
   1 -14 -21 2125.81   84.07
  -1 -14  21 1949.00   73.18
   1  14 -20  365.58  154.52
  -1  14  20  308.04   49.90
  -1 -14  20  443.91   50.08
   1 -14 -20  330.71   60.50
   1 -14 -20  300.73   36.58
  -1 -14  20  226.03   54.54
   1  14 -19    6.63   10.01
  -1  14  19   -7.06   11.57
  -1 -14  19   26.10    9.74
   1 -14 -19   36.17   15.29
   1 -14 -19   -4.40   15.16
  -1 -14  19   14.66   13.52
   1  14 -18  326.52   45.92
  -1  14  18  330.98   54.73
  -1 -14  18  377.13   40.74
   1 -14 -18  287.28   62.55
   1 -14 -18  283.32   52.92
  -1 -14  18  272.27   25.13
   1  14 -17 8859.07  346.42
  -1  14  17 9379.51  361.75
  -1 -14  17 9918.41  385.27
   1 -14 -17 9239.15  367.77
   1 -14 -17 9770.55  380.67
  -1 -14  17 9425.88  364.48
  -1  14  16    8.00   12.46
  -1  14  16    7.17    8.31
   1  14 -16   16.77   11.78
  -1 -14  16    8.60    4.96
  -1 -14  16    4.98    6.08
   1 -14 -16   23.83   14.48
  -1 -14  16   17.31   10.60
  -1  14  15  885.93   57.70
  -1  14  15  665.92   66.87
   1  14 -15  727.37  120.77
  -1 -14  15  809.23   50.90
   1 -14 -15  968.32   79.78
  -1 -14  15  894.40   68.73
  -1  14  14  968.32   56.39
   1  14 -14  964.01   73.98
  -1  14  14  935.04   57.29
   1  14 -14  859.86   70.02
  -1 -14  14  918.49   51.95
   1 -14 -14 1126.88  111.69
  -1 -14  14  890.80   66.44
  -1  14  13 3851.48  145.81
   1  14 -13 3724.75  137.77
  -1  14  13 3457.75  114.39
   1  14 -13 3846.30  145.49
  -1 -14  13 3443.90   38.86
   1 -14 -13 4069.82  155.74
  -1 -14  13 3608.71  137.25
   1  14 -12 4434.59  140.67
  -1  14  12 5658.08  158.52
   1  14 -12 5312.28  170.46
  -1  14  12 5417.73  158.61
   1  14 -12 4959.62  178.81
  -1 -14  12 4735.66  152.23
   1 -14 -12 5376.26  158.61
  -1 -14  12 5240.03  148.70
   1  14 -11  101.51   23.02
  -1  14  11  169.01   33.76
  -1  14  11  178.79   35.29
   1  14 -11  175.25   25.78
   1  14 -11  189.71   31.62
   1 -14 -11  103.27   26.85
   1 -14 -11  170.31   30.04
  -1 -14  11  141.04   25.78
   1  14 -10    5.43    4.64
  -1  14  10    9.17    6.32
  -1  14  10   26.83   12.11
   1  14 -10   28.23   11.16
   1  14 -10   30.37   10.85
   1 -14 -10    5.73    8.03
  -1 -14  10   12.20    7.85
   1 -14 -10   15.46   16.30
  -1 -14  10   11.44    7.01
   1  14  -9 7089.67  151.43
  -1  14   9 7476.52  154.44
  -1  14   9 7123.92  167.54
   1  14  -9 7319.15  154.96
   1  14  -9 7551.84  167.19
   1 -14  -9 6501.55  134.93
  -1 -14   9 7205.41  154.82
   1 -14  -9 7415.01  166.09
  -1 -14   9 7203.58  158.65
   1  14  -8 2854.37   94.08
  -1  14   8 2812.05   93.14
  -1  14   8 2855.39  100.10
   1  14  -8 2651.12   99.33
   1  14  -8 2881.35  115.80
   1 -14  -8 2823.98   94.40
  -1 -14   8 2656.10   95.07
   1 -14  -8 2613.68  112.71
  -1 -14   8 2742.04  114.99
   1  14  -7    3.07    7.27
  -1  14   7   -1.10    7.77
  -1  14   7   -4.91   14.73
   1  14  -7   -0.43    6.35
   1  14  -7  -21.48   16.13
   1 -14  -7    7.30    7.49
  -1 -14   7    1.77    6.23
   1 -14  -7   -7.20   15.00
  -1 -14   7   14.26    7.19
   1  14  -6  260.78   36.98
  -1  14   6  274.83   22.57
  -1  14   6  336.51   53.73
   1  14  -6  295.54   40.93
   1  14  -6  370.18   46.67
   1 -14  -6  264.25   35.34
  -1 -14   6  271.32   23.25
   1 -14  -6  378.81   45.93
  -1 -14   6  347.36   58.18
   1  14  -511068.51  229.20
  -1  14   510909.44  225.31
  -1  14   510564.23  227.11
   1  14  -511048.60  231.33
   1  14  -511124.54  243.93
   1 -14  -510724.52  224.62
  -1 -14   5 9982.18  209.36
  -1 -14   510628.62  228.85
   1 -14  -511602.31  254.58
   1  14  -4 7294.76  153.19
  -1  14   4 7229.69  152.72
  -1  14   4 7349.68  164.11
   1  14  -4 7316.11  159.74
   1  14  -4 7549.37  181.12
   1 -14  -4 7633.38  161.98
  -1 -14   4 7337.78  156.53
  -1 -14   4 7584.55  184.01
   1 -14  -4 8129.56  178.03
   1  14  -3  980.49   38.42
  -1  14   3  981.09   37.24
   1  14  -3  985.59   40.56
  -1  14   3  916.45   51.35
   1  14  -3  993.63   47.05
   1 -14  -3  977.61   38.28
   1 -14  -3  956.35   52.68
  -1 -14   3  939.97   51.86
   1 -14  -3  951.87   53.10
  -1 -14   3  945.86   58.68
   1 -14  -3 1053.07   58.31
  -1 -14   3  953.29   62.18
  -1  14   2   59.31   13.28
   1  14  -2   93.25   14.69
   1  14  -2  108.29   17.36
  -1  14   2   64.76   18.02
  -1 -14   2   73.64   13.36
   1 -14  -2   77.74   15.85
   1 -14  -2   84.18   13.73
  -1 -14   2   57.54   10.94
  -1 -14   2   56.25   10.69
   1 -14  -2   61.36   13.68
   1 -14  -2   77.00   14.33
  -1 -14   2   73.92   15.63
  -1  14   1 2606.73   84.06
   1  14  -1 2481.96   87.60
   1  14  -1 2650.30   91.44
  -1  14   1 2551.95   88.88
   1 -14  -1 2494.71   82.93
  -1 -14   1 2540.40   90.46
   1 -14  -1 2542.66   85.24
   1 -14  -1 2602.59   91.21
  -1 -14   1 2617.83   90.06
  -1  14   0  302.36   13.44
   1  14   0  367.73   31.28
   1  14   0  331.83   47.96
   1  14   0  440.12   55.67
  -1  14   0  345.24   24.67
   1 -14   0  315.40   15.24
  -1 -14   0  340.09   41.35
   1 -14   0  401.61   59.64
   1 -14   0  370.21   41.73
  -1 -14   0  351.40   35.63
   1 -14   0  353.06   35.71
  -1 -14   0  350.77   31.26
  -1  14  -1  877.16   45.34
  -1  14  -1  920.03   47.26
   1  14   1  953.90   54.28
  -1  14  -1  955.26   65.18
   1  14   1  953.49   64.88
   1  14   1  861.50   48.30
   1 -14   1  842.87   64.27
  -1 -14  -1  832.76   58.24
  -1 -14  -1  756.96   49.04
   1 -14   1  918.99   50.22
   1 -14   1  822.24   48.75
  -1  14  -2 1422.57   53.17
   1  14   2 1617.17   56.19
  -1  14  -2 1520.88   57.48
   1  14   2 1499.62   62.23
   1  14   2 1554.74   87.04
  -1  14  -2 1439.19   62.11
  -1 -14  -2 1518.88   60.62
  -1 -14  -2 1535.92   59.72
   1 -14   2 1476.57   58.80
  -1 -14  -2 1365.49   56.38
   1 -14   2 1500.91   68.24
   1 -14   2 1411.65   57.17
  -1  14  -310260.63  209.68
  -1  14  -3 9983.63  213.59
   1  14   310238.87  225.23
   1  14   3 9162.91  196.05
   1 -14   3 9197.83  194.25
  -1 -14  -3 9251.52  195.12
   1 -14   310003.24  217.70
  -1 -14  -310211.10  218.30
  -1  14  -4  249.48   11.76
   1  14   4  295.03   22.15
  -1  14  -4  299.80   21.08
   1  14   4  315.04   43.41
   1  14   4  346.98   50.02
  -1  14  -4  366.04   53.53
  -1 -14  -4  241.88   28.58
  -1 -14  -4  301.87   22.94
   1 -14   4  289.11   34.83
  -1 -14  -4  385.13   57.58
   1 -14   4  309.97   22.96
   1 -14   4  264.36   43.96
  -1  14  -5  791.01   41.50
   1  14   5  776.64   41.99
  -1  14  -5  788.47   42.87
  -1  14  -5  834.71   58.10
   1  14   5  744.10   50.93
  -1 -14  -5  761.81   56.50
   1 -14   5  827.36   46.50
  -1 -14  -5  783.73   49.10
   1 -14   5  795.76   46.52
  -1  14  -6  138.59   19.56
   1  14   6  139.81   23.81
   1  14   6  150.26   24.21
  -1  14  -6  133.50   14.23
  -1  14  -6  151.98   20.99
  -1 -14  -6  134.41   21.57
   1 -14   6  136.90   27.19
  -1 -14  -6  155.19   28.00
   1 -14   6  131.69   23.75
  -1  14  -7 1866.61   63.25
   1  14   7 2096.13   72.59
   1  14   7 2002.20   77.57
  -1  14  -7 2034.51   71.42
  -1  14  -7 1853.12   69.44
  -1 -14  -7 1828.88   65.17
   1 -14   7 1950.59   67.49
  -1 -14  -7 1992.08   81.28
   1 -14   7 1883.22   77.90
  -1  14  -8 5551.82 1046.87
   1  14   8 5727.89  136.26
   1  14   8 5595.76  146.15
  -1  14  -8 5108.68  156.61
  -1  14  -8 5634.82  125.52
  -1 -14  -8 5160.03  158.82
   1 -14   8 5207.75  160.77
  -1 -14  -8 5772.01  129.60
  -1  14  -9  508.43   36.75
   1  14   9  599.14   45.05
  -1  14  -9  599.51   66.53
  -1  14  -9  592.88   61.36
   1  14   9  704.90   97.48
  -1  14  -9  568.60   55.86
  -1 -14  -9  515.99   45.01
   1 -14   9  561.87   42.65
  -1 -14  -9  638.26   82.07
  -1  14 -10  253.33   35.14
   1  14  10  330.20   48.40
  -1  14 -10  303.03   30.55
  -1  14 -10  293.87   40.93
   1  14  10  343.12   48.43
  -1  14 -10  301.05   47.55
  -1 -14 -10  186.16   43.00
   1 -14  10  233.40   38.29
  -1 -14 -10  374.68   45.82
  -1  14 -11 1936.93   86.74
   1  14  11 1684.65   74.84
   1  14  11 1742.50   78.89
  -1  14 -11 1754.43   81.38
   1 -14  11 1785.53   83.42
  -1 -14 -11 1759.42   95.13
  -1  14 -12   35.73   17.26
  -1  14 -12    1.84    6.56
   1  14  12    5.48    5.85
   1  14  12   -2.15    6.16
  -1  14 -12   10.86    5.11
   1 -14  12   -7.03    6.70
  -1 -14 -12   -8.72   17.11
  -1  14 -13  492.46   86.72
   1  14  13  438.01   66.10
  -1  14 -13  310.17   49.85
   1  14  13  378.13   68.94
  -1  14 -13  410.93   53.59
   1 -14  13  435.03   45.75
  -1 -14 -13  460.62   57.35
  -1  14 -14 1407.16  125.69
  -1  14 -14 1254.41   63.70
   1  14  14 1394.10   73.41
   1  14  14 1456.96   79.61
  -1  14 -14 1423.24  106.32
   1 -14  14 1441.67   80.39
  -1 -14 -14 1379.39  132.71
  -1  14 -15  648.31   80.99
   1  14  15  701.58   52.85
   1  14  15  768.62   97.86
  -1  14 -15  614.86   87.97
   1 -14  15  682.31   62.92
  -1 -14 -15  735.55   92.53
  -1  14 -16  261.10   45.03
   1  14  16  272.99   61.37
   1  14  16  293.36   44.29
  -1  14 -16  310.54   64.78
   1 -14  16  306.18   53.41
  -1 -14 -16  272.35   45.90
  -1  14 -17    7.59    7.64
   1  14  17    8.07    9.91
  -1  14 -17   66.89   19.61
  -1 -14 -17   75.43   24.75
   1 -14  17   26.09   13.90
  -1 -14 -17    6.75    8.37
  -1  14 -18 1607.89   62.18
   1  14  18 1720.43   56.88
  -1  14 -18 1620.50  124.84
  -1 -14 -18 1595.84  137.64
   1 -14  18 1725.77   90.31
  -1 -14 -18 1559.24   73.69
  -1  14 -19  677.55   54.48
   1  14  19  704.73   58.88
  -1  14 -19  686.02   66.95
  -1 -14 -19  561.46  103.75
   1 -14  19  677.07   50.91
  -1 -14 -19  685.11   92.33
  -1  14 -20  423.44   51.11
   1  14  20  408.07   67.42
  -1  14 -20  462.98   50.63
  -1 -14 -20  380.60   79.69
   1 -14  20  458.65   46.04
  -1 -14 -20  394.85   43.23
  -1  14 -21  201.28   34.45
   1  14  21  171.97   46.07
  -1  14 -21  181.51   33.46
  -1 -14 -21  213.57   47.69
   1 -14  21  214.36   34.24
  -1 -14 -21  216.17   39.97
  -1  14 -22 2382.48  126.69
   1  14  22 2770.83  122.53
   1 -14  22 2796.62  119.65
  -1 -14 -22 2564.61  119.94
  -1 -14 -22 2345.46  116.32
  -1  14 -23  127.58   28.99
   1  14  23   85.61   28.95
   1 -14  23  136.74   18.90
  -1 -14 -23  159.35   33.80
  -1 -14 -23   85.56   23.05
  -1  14 -24    7.64    7.47
   1  14  24    9.39    7.27
  -1  14 -24   14.13    9.33
  -1 -14 -24   -7.22   22.54
   1 -14  24   14.76    7.56
  -1 -14 -24   25.98   10.27
  -1  14 -25   61.19   25.08
   1  14  25   47.69   17.29
   1 -14  25   70.81   19.63
  -1 -14 -25   83.79   20.73
  -1 -14 -25   84.07   24.80
   1  15 -25  225.74   55.83
  -1  15  25  270.38   54.55
  -1 -15  25  244.98   38.23
   1 -15 -25  208.55   38.04
   1 -15 -25  231.03   56.66
   1  15 -24   50.75   15.07
  -1  15  24   32.70    9.38
  -1 -15  24   40.06   10.23
   1 -15 -24   39.03   20.36
   1 -15 -24   36.21   11.90
   1  15 -23 1047.75  162.64
  -1  15  23 1221.54  103.06
  -1 -15  23 1301.22  132.27
   1 -15 -23 1077.21  126.03
   1 -15 -23 1048.61  130.10
   1  15 -22  256.94   41.81
  -1  15  22  274.26   41.16
  -1 -15  22  360.22   34.09
   1 -15 -22  247.74   54.92
   1 -15 -22  284.90   65.74
   1  15 -21  137.23   27.74
  -1  15  21   92.23   16.05
  -1 -15  21  147.87   17.01
   1 -15 -21  107.59   30.82
   1 -15 -21   55.97   26.64
   1  15 -20   61.43   18.48
  -1  15  20   39.06   12.32
  -1 -15  20   77.29   17.01
   1 -15 -20   50.03   18.59
   1 -15 -20   53.85   14.39
  -1 -15  20   19.19    8.17
   1  15 -19 5622.00  213.95
  -1  15  19 5635.09  205.86
  -1 -15  19 5700.51  207.65
   1 -15 -19 6017.36  233.79
   1 -15 -19 5853.68  221.73
  -1 -15  19 5327.05  193.10
   1  15 -18  107.15   14.01
  -1  15  18   79.84   19.63
  -1 -15  18   63.97   13.73
   1 -15 -18   58.27   28.68
   1 -15 -18   55.84   14.71
  -1 -15  18   76.83   19.53
  -1  15  17    4.19    8.03
   1  15 -17   25.00   16.29
   1  15 -17   34.19   17.74
   1 -15 -17   25.63    9.79
  -1 -15  17    4.19    7.92
  -1  15  16  671.83   58.64
   1  15 -16  766.82  112.51
  -1  15  16  702.10   50.68
   1  15 -16  802.77  101.55
  -1 -15  16  626.91   20.04
   1 -15 -16  804.39   61.04
  -1 -15  16  664.31   50.23
  -1  15  15 6216.02  225.14
   1  15 -15 6116.52  224.92
  -1  15  15 4593.63  176.29
   1  15 -15 4647.30  176.25
  -1 -15  15 4911.87  177.76
   1 -15 -15 6161.50  229.30
  -1 -15  15 5899.69  214.42
  -1  15  14 1442.74   76.46
   1  15 -14 1383.41   74.82
  -1  15  14 1482.98   83.99
   1  15 -14 1193.94  133.55
  -1 -15  14 1311.61   66.51
   1 -15 -14 1582.17   84.59
  -1 -15  14 1408.59   81.14
  -1  15  13 2833.27  114.10
   1  15 -13 2871.48  129.92
  -1  15  13 2814.13  117.19
   1  15 -13 2911.20  297.33
  -1 -15  13 2607.76  103.80
   1 -15 -13 2897.58  292.37
  -1 -15  13 2761.86  115.18
   1  15 -12  393.52   32.78
  -1  15  12  548.44   61.82
  -1  15  12  488.90   75.77
   1  15 -12  520.92   86.40
   1  15 -12  536.07   56.41
   1 -15 -12  399.25   59.88
  -1 -15  12  467.96   39.42
   1 -15 -12  534.64   76.68
  -1 -15  12  503.45   83.54
   1  15 -11 1622.66   86.08
  -1  15  11 1709.70   30.06
  -1  15  11 1756.76   78.66
   1  15 -11 1823.73   84.93
   1  15 -11 1690.67   50.76
   1 -15 -11 1476.20   96.28
  -1 -15  11 1556.47   86.50
   1 -15 -11 1764.53   86.99
  -1 -15  11 1758.98   84.72
   1  15 -10  134.31   29.68
  -1  15  10  189.70   36.41
  -1  15  10  203.64   38.28
   1  15 -10  188.76   34.24
   1  15 -10  258.86   39.49
   1 -15 -10  110.71   30.76
  -1 -15  10  159.15   26.11
   1 -15 -10  213.93   40.06
  -1 -15  10  210.08   37.49
   1  15  -9 1437.95   65.13
  -1  15   9 1725.71   74.04
  -1  15   9 1625.85   86.67
   1  15  -9 1689.61   85.23
   1  15  -9 1801.23  107.01
   1 -15  -9 1701.75   84.04
  -1 -15   9 1600.67   76.42
   1 -15  -9 1553.95   85.20
  -1 -15   9 1649.57   79.11
   1  15  -8  364.56   61.66
  -1  15   8  395.91   41.67
  -1  15   8  487.71   74.97
   1  15  -8  433.31   63.55
   1  15  -8  539.35   79.32
   1 -15  -8  377.01   41.64
  -1 -15   8  378.65   41.52
   1 -15  -8  518.51   75.35
  -1 -15   8  424.40   56.27
   1  15  -718948.85  375.60
  -1  15   718648.30  370.96
  -1  15   719361.21 2848.53
   1  15  -719132.96 2814.33
   1  15  -720228.53 2975.42
   1 -15  -718946.64  377.35
  -1 -15   717372.74  344.41
   1 -15  -718756.63  391.56
  -1 -15   719062.25 2804.12
   1  15  -6  136.60   19.18
  -1  15   6  139.30   19.47
  -1  15   6  139.26   26.05
   1  15  -6  149.65   25.44
   1  15  -6  133.62   22.53
   1 -15  -6   97.14   16.04
  -1 -15   6  112.77   19.21
   1 -15  -6  165.74   25.90
  -1 -15   6  132.60   22.45
   1  15  -5 1466.65   63.80
  -1  15   5 1532.72   62.14
  -1  15   5 1640.62   78.44
   1  15  -5 1600.18   67.70
   1  15  -5 1742.79   94.19
   1 -15  -5 1615.84  306.65
  -1 -15   5 1555.95   65.13
   1 -15  -5 1491.62   65.14
  -1 -15   5 1708.11   64.67
   1  15  -4 1142.81   50.71
  -1  15   4 1136.57   51.86
   1  15  -4 1184.69   54.09
   1  15  -4 1453.05  111.91
  -1  15   4 1180.76   56.41
   1 -15  -4 1165.44   53.69
  -1 -15   4 1143.85   49.54
   1 -15  -4 1358.18  107.77
  -1 -15   4 1170.67   73.67
   1  15  -3  190.51   24.60
  -1  15   3  188.60   36.94
  -1  15   3  207.60   35.39
   1  15  -3  255.00   29.48
   1  15  -3  231.44   36.02
   1 -15  -3  190.82   20.33
  -1 -15   3  167.66   28.12
  -1 -15   3  247.05   34.68
   1 -15  -3  230.83   32.73
  -1  15   2 6093.46  131.29
   1  15  -2 5866.14  124.83
   1 -15  -2 5905.29  117.80
  -1 -15   2 5739.83  117.60
  -1 -15   2 5125.98  168.88
   1 -15  -2 5935.22  128.49
  -1  15   1  198.97   10.51
   1  15  -1  204.93   25.44
  -1  15   1  258.11   41.81
   1  15  -1  288.97   48.25
  -1 -15   1  217.84   31.61
   1 -15  -1  201.81   19.27
  -1 -15   1  200.13   34.81
   1 -15  -1  291.34   50.36
  -1 -15   1  255.13   46.24
  -1  15   0   13.41    3.47
   1  15   0    4.67    6.90
   1  15   0   23.49   10.20
  -1  15   0   29.28   11.53
   1  15   0    8.52    9.54
   1 -15   0   10.92    4.48
  -1 -15   0   15.46    6.20
   1 -15   0   -4.50   14.86
  -1 -15   0   19.11    9.51
  -1  15  -1 9843.23  188.99
   1  15   110430.76  206.09
  -1  15  -110842.64  208.72
  -1  15  -110284.82  211.05
   1  15   110228.51  209.62
  -1 -15  -1 9512.00  188.70
  -1 -15  -1 9727.30  201.84
   1 -15   110151.59  208.31
  -1  15  -2  869.55   51.96
   1  15   2  950.51   44.88
  -1  15  -2  891.52   56.43
  -1  15  -2  928.62   84.90
   1  15   2  967.90   65.36
  -1 -15  -2  873.90   54.16
  -1 -15  -2  881.84   67.61
   1 -15   2  966.30   47.93
  -1  15  -3  124.88    9.01
   1  15   3  181.03   29.58
  -1  15  -3  120.20   16.04
  -1  15  -3  180.25   28.10
   1  15   3   94.27   71.59
  -1 -15  -3  153.45   26.98
  -1 -15  -3  178.54   31.13
   1 -15   3  198.87   33.55
  -1  15  -4  801.65   47.42
   1  15   4  817.73   52.07
   1  15   4  838.26   56.23
  -1  15  -4  749.90   46.09
  -1  15  -4  894.38   60.61
  -1 -15  -4  764.09   72.57
  -1 -15  -4  835.68   70.47
   1 -15   4  718.51   51.81
   1  15   5 4274.87  132.34
   1  15   5 4365.19  138.98
  -1  15  -5 4219.17  129.46
  -1  15  -5 4175.23  134.43
  -1 -15  -5 4209.89  130.72
  -1 -15  -5 4215.96  134.55
   1 -15   5 4170.39  137.84
  -1  15  -6 1312.63   54.63
   1  15   6 1360.76   56.52
   1  15   6 1309.00   56.73
  -1  15  -6 1382.95   54.43
  -1  15  -6 1259.81   63.66
  -1 -15  -6 1385.15   59.35
  -1 -15  -6 1318.10   61.21
   1 -15   6 1280.14   56.33
  -1  15  -7   36.27    7.40
   1  15   7   60.20   12.22
   1  15   7   29.74   12.47
  -1  15  -7   47.10    8.94
  -1  15  -7   39.06   16.53
  -1 -15  -7   29.70    9.49
  -1 -15  -7   54.28   11.76
   1 -15   7   42.48   21.44
  -1  15  -8  203.70   19.62
   1  15   8  270.14   42.88
   1  15   8  270.45   39.83
  -1  15  -8  226.01   31.18
  -1  15  -8  278.24   52.97
  -1 -15  -8  166.00   32.80
  -1 -15  -8  242.29   39.58
   1 -15   8  247.98   50.61
  -1  15  -9  619.31   51.12
   1  15   9  682.59   56.31
   1  15   9  637.06   56.92
  -1  15  -9  604.19   48.05
  -1  15  -9  669.27   72.87
  -1 -15  -9  507.00   47.07
  -1 -15  -9  664.49   77.34
   1 -15   9  692.63   57.55
  -1  15 -10  752.39   56.53
   1  15  10  792.62   61.80
  -1  15 -10  772.18   67.03
  -1  15 -10  773.57   61.42
   1  15  10  889.76   87.66
  -1  15 -10  881.86  111.57
  -1 -15 -10  707.34   55.74
  -1 -15 -10 1056.24  100.22
   1  15  11   67.92   17.57
  -1  15 -11   69.00   16.10
  -1  15 -11   98.44   21.17
   1  15  11   86.79   22.65
  -1  15 -11   70.15   15.74
  -1  15 -11   84.94   17.98
  -1 -15 -11   80.44   18.55
   1  15  12 1619.96   89.03
  -1  15 -12 1612.75   85.07
[truncated: 4,459,415 more chars]
