# Supplementary material
Source: MDPI journal article supplement (https://www.mdpi.com/2304-6740/5/4/84)
Supplement: s1 [file s1 › inorganics-244705-supplementary/inorganics-244705-supplementary.pdf]

## Supporting information for

# Construction of a Planar Tetrapalladium Cluster by the Reaction of Palladium(0) Bis(isocyanide) with Cyclic Tetrasilane

Yusuke Sunada\*, Nobuhiro Taniyama, Kento Shimamoto, Soichiro Kyushin and Hideo Nagashima

### Contents

|                                                                                                                         |        |
|-------------------------------------------------------------------------------------------------------------------------|--------|
| 1. $^1\text{H}$ , $^{13}\text{C}\{^1\text{H}\}$ NMR spectra of <b>4</b>                                                 | p. S-2 |
| 2. $^1\text{H}$ NMR spectra of <b>4</b> in toluene- $d_8$ at various temperatures                                       | p. S-3 |
| 3. $^1\text{H}$ , $^{13}\text{C}\{^1\text{H}\}$ , $^{29}\text{Si}\{^1\text{H}\}$ NMR spectra of <b>5</b>                | p. S-4 |
| 4. $^1\text{H}$ , $^{13}\text{C}\{^1\text{H}\}$ , $^{31}\text{P}\{^1\text{H}\}$ NMR spectra of <b>6</b>                 | p. S-6 |
| 5. $^1\text{H}$ , $^{31}\text{P}\{^1\text{H}\}$ NMR spectra of <i>in situ</i> generated Pd(trimethylolpropane)phosphite | p. S-7 |
| 6. IR spectrum of <b>4</b>                                                                                              | p. S-8 |
| 7. X-ray diffraction analysis                                                                                           | p. S-9 |

**Figure S1-1.**  $^1\text{H}$  NMR spectrum of solution of **4** in  $\text{C}_6\text{D}_6$  at room temperature.

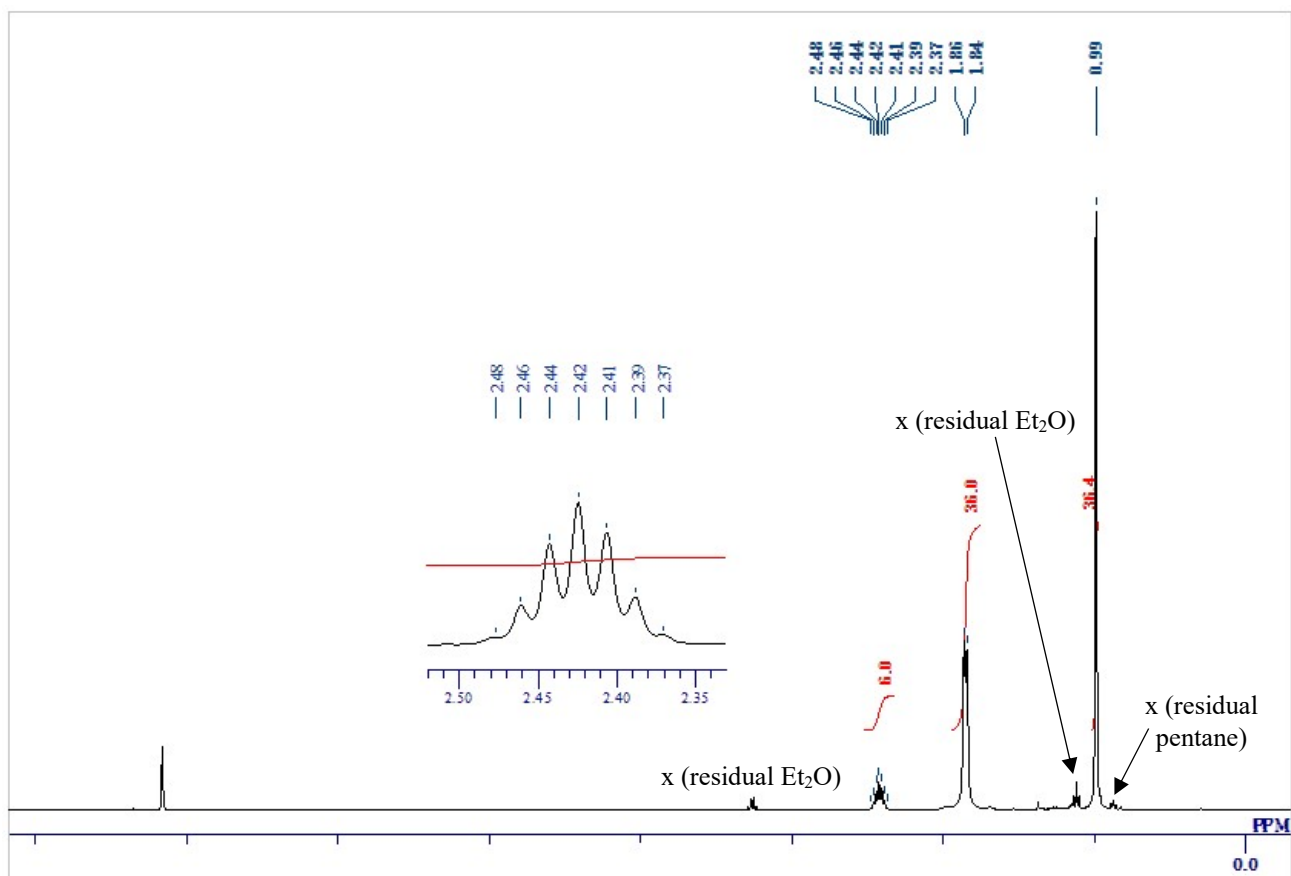

**Figure S1-2.**  $^{13}\text{C}\{^1\text{H}\}$  NMR spectrum of solution of **4** in  $\text{C}_6\text{D}_6$  at room temperature.

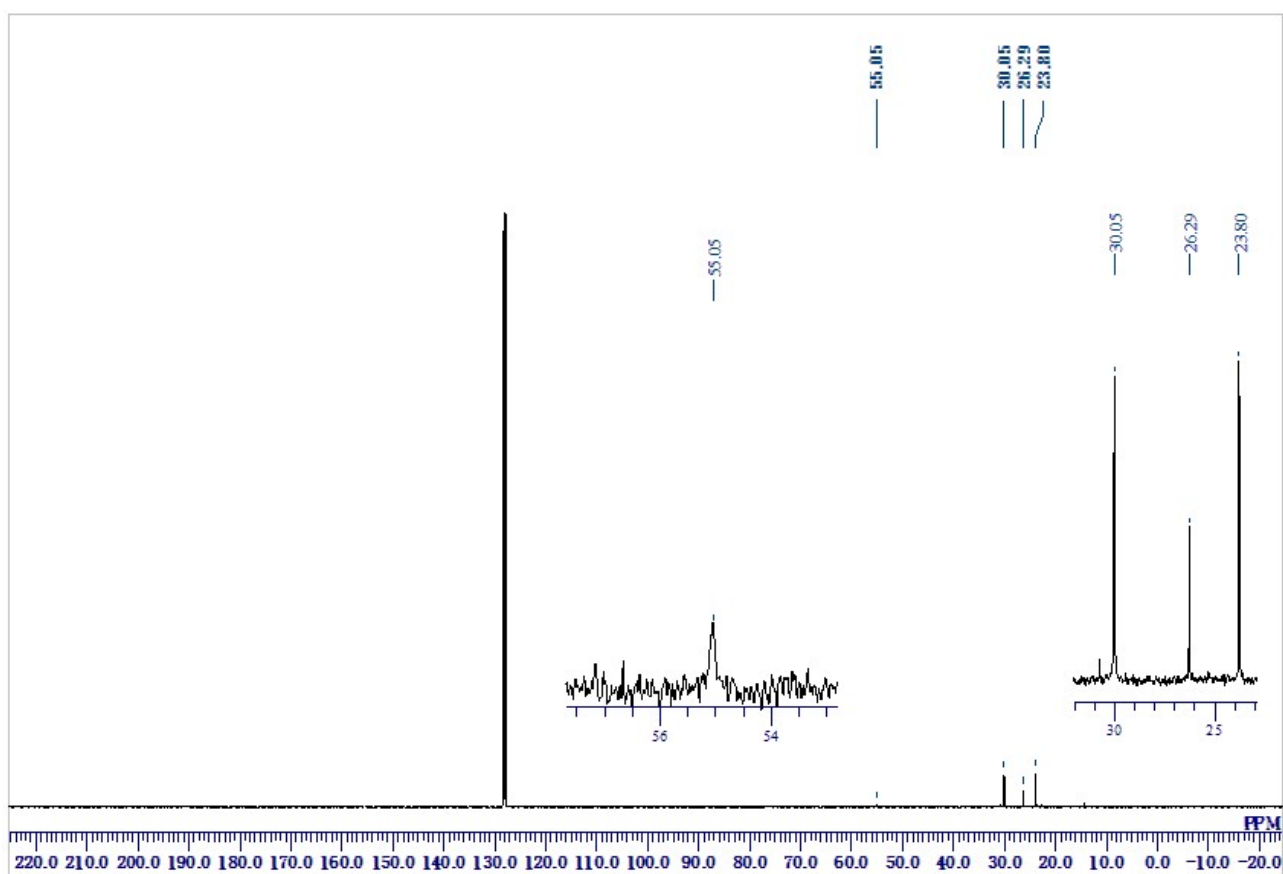

**Figure S2-1.**  $^1\text{H}$  NMR spectrum of solution of **4** in toluene- $\text{d}_8$  at various temperatures.

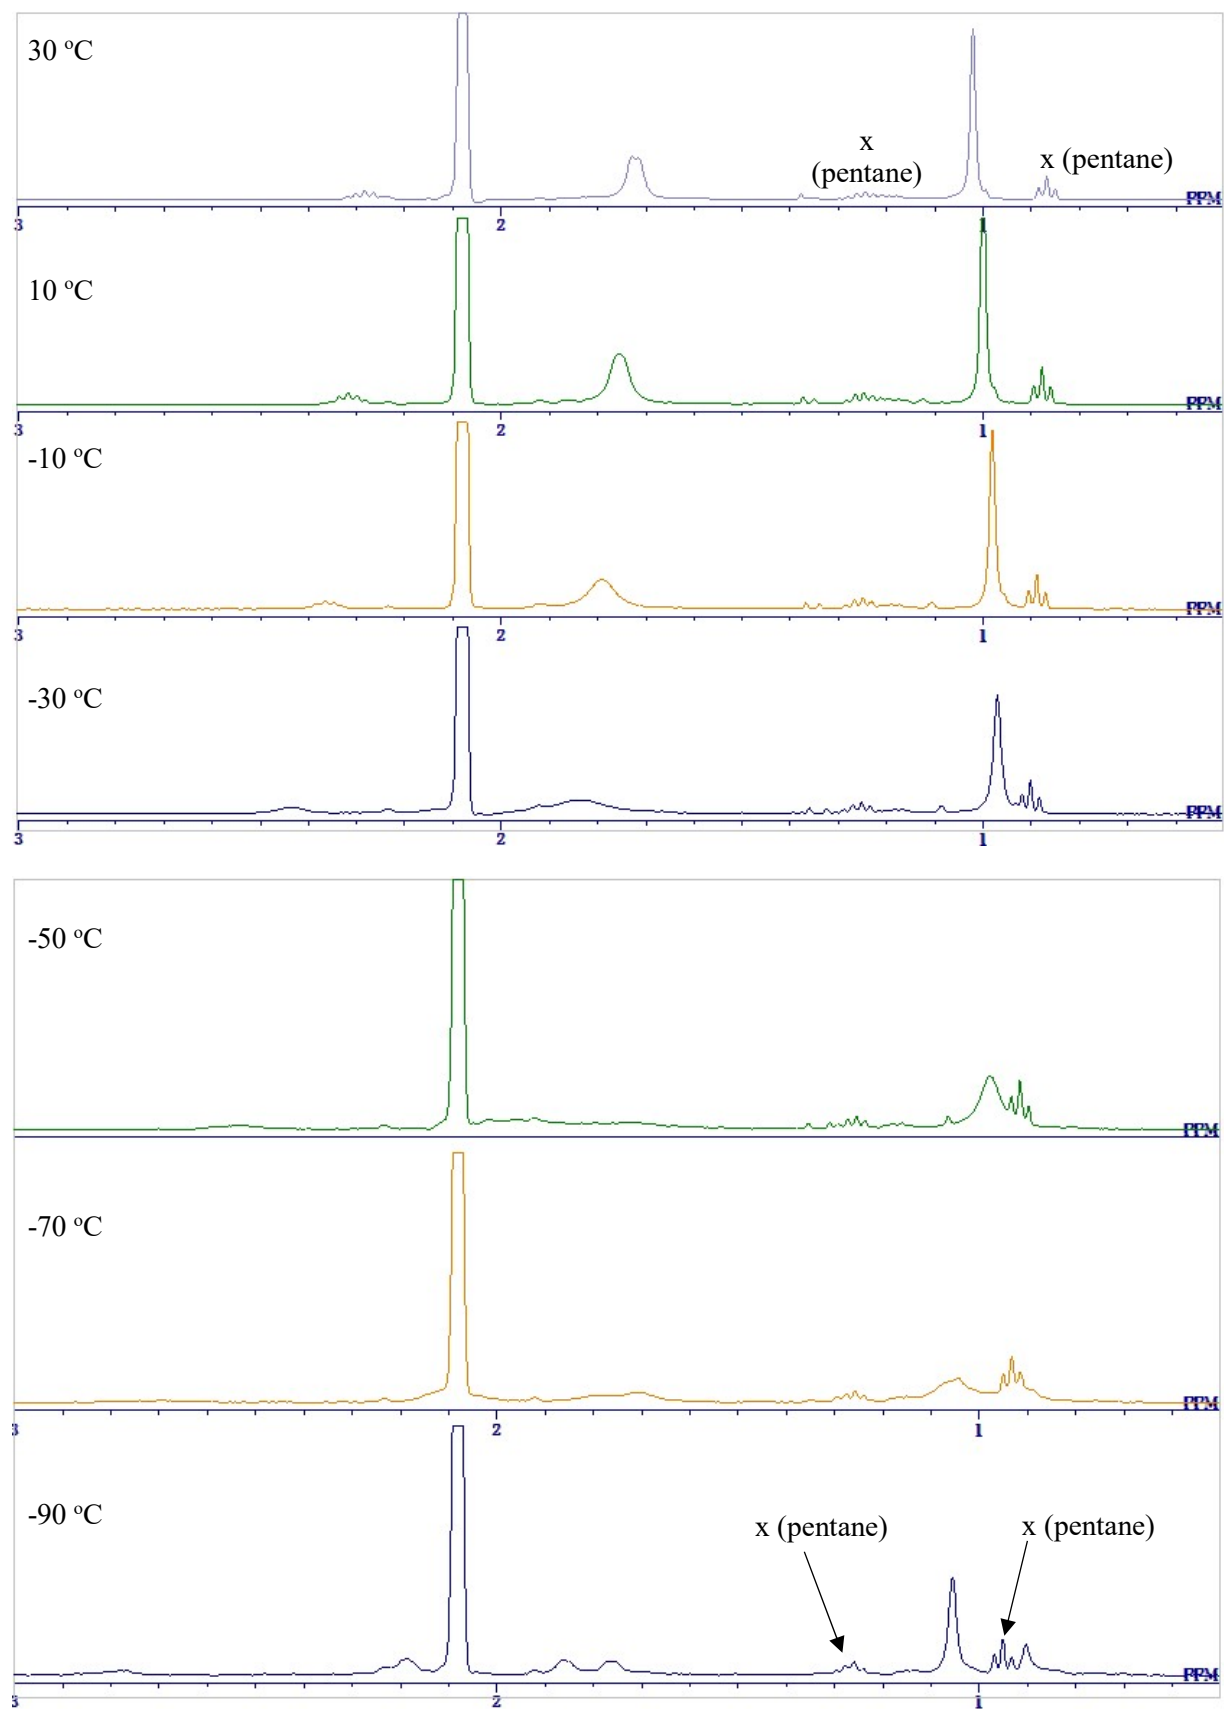

1H NMR spectrum of pentane in CDCl<sub>3</sub>. The spectrum shows peaks for pentane and solvent. Two insets provide expanded views of the 1.7-2.3 ppm and 0.8-1.3 ppm regions. The top inset shows peaks at 2.78, 2.19, 1.86, and 1.76 ppm, with labels "x (spinning side band)" pointing to peaks at 2.25 and 2.00 ppm. The bottom inset shows peaks at 1.05 and 0.90 ppm, with labels "x (pentane)" pointing to peaks at 1.25 and 0.95 ppm. The main spectrum has a chemical shift scale from 0 to 8 ppm.

**Figure S3-2.**  $^{13}\text{C}\{^1\text{H}\}$  NMR spectrum of solution of **5** in  $\text{C}_6\text{D}_6$  at room temperature.

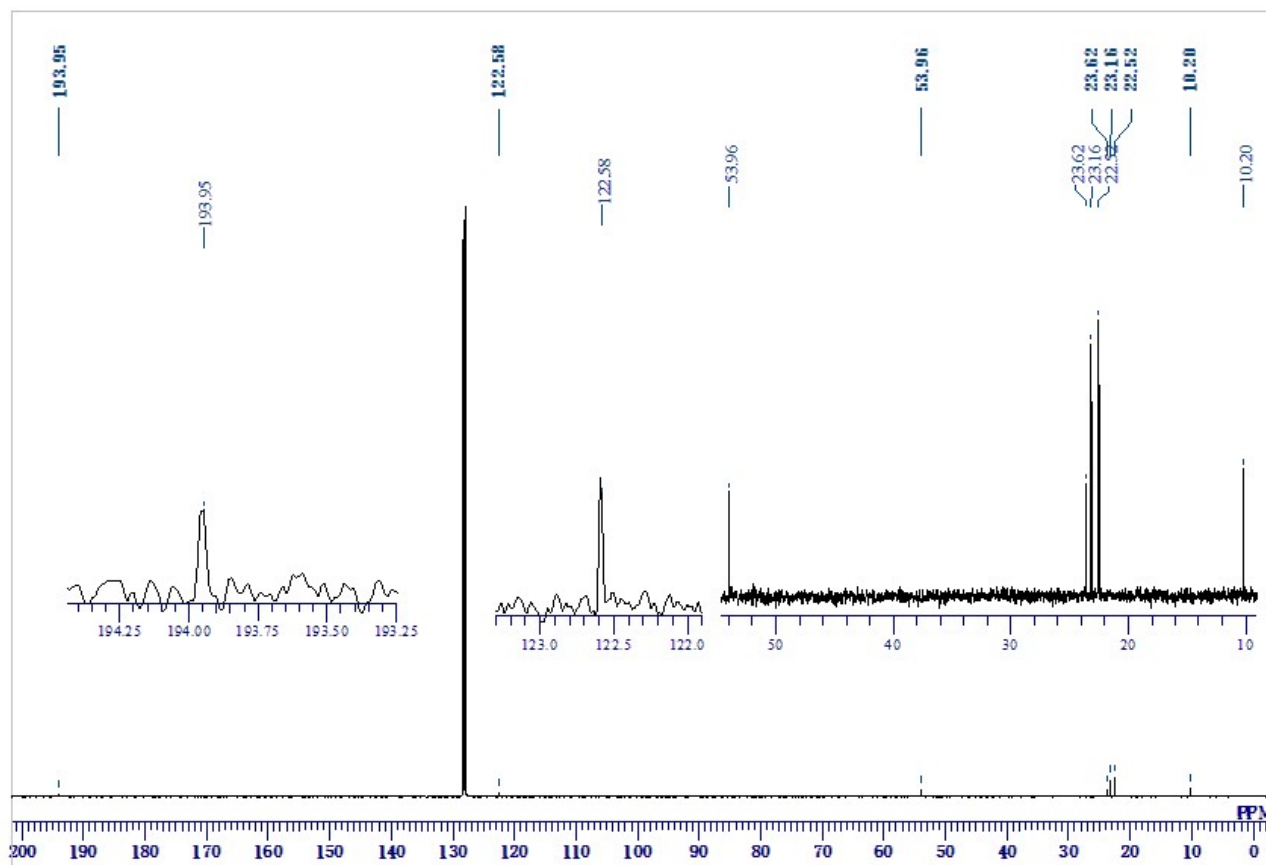

**Figure S3-3.**  $^{29}\text{Si}\{^1\text{H}\}$  NMR spectrum of solution of **5** in  $\text{C}_6\text{D}_6$  at room temperature.

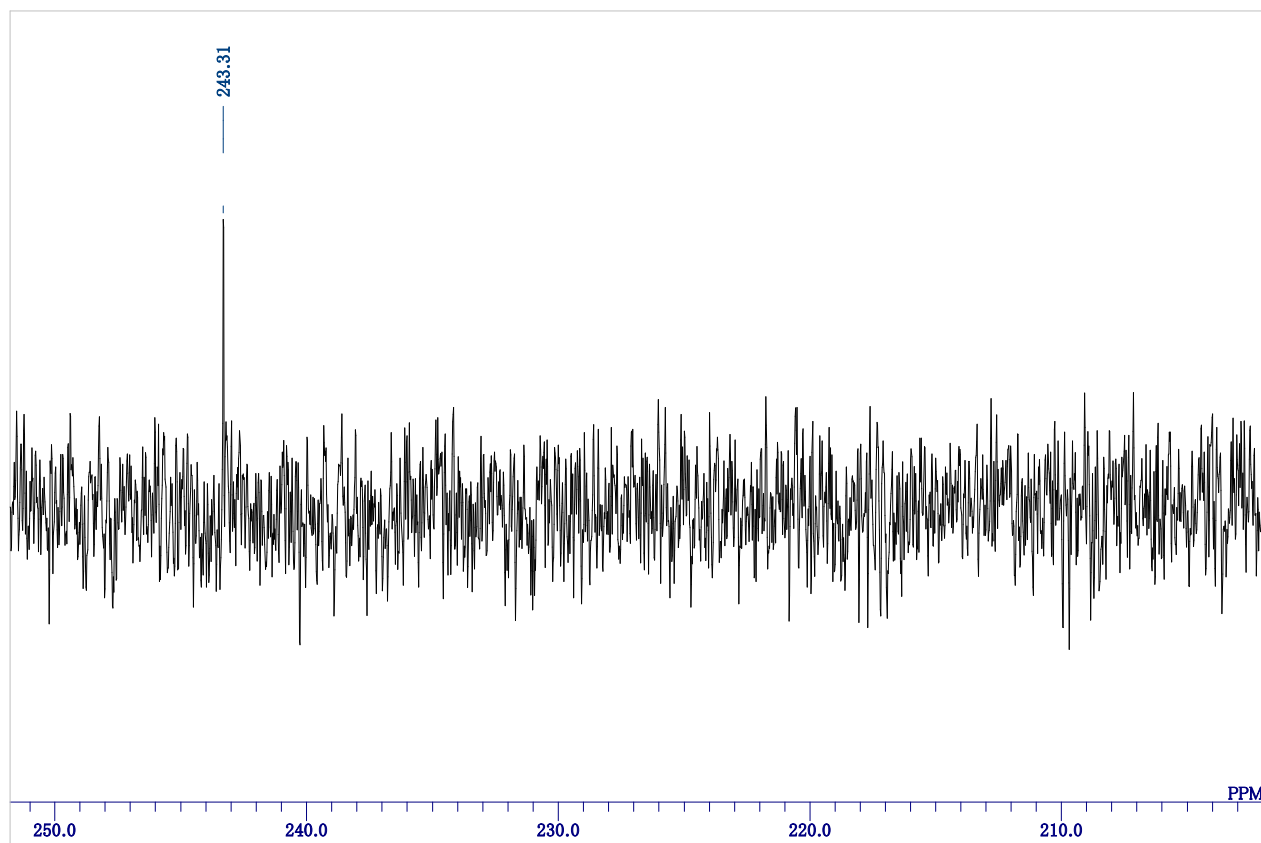

**Figure S4-1.**  $^1\text{H}$  NMR spectrum of solution of **6** in  $\text{C}_6\text{D}_6$  at room temperature.

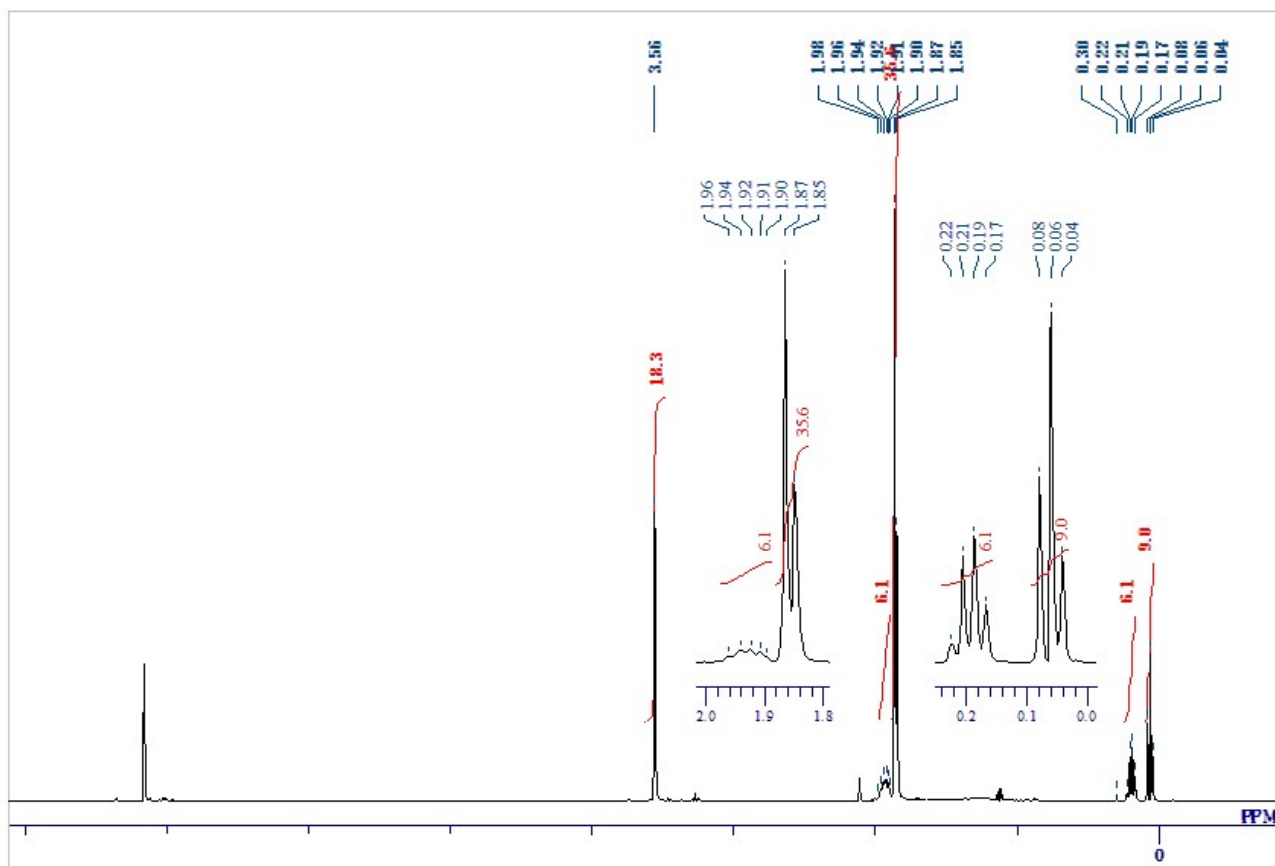

**Figure S4-2.**  $^{13}\text{C}\{^1\text{H}\}$  NMR spectrum of solution of **6** in  $\text{C}_6\text{D}_6$  at room temperature.

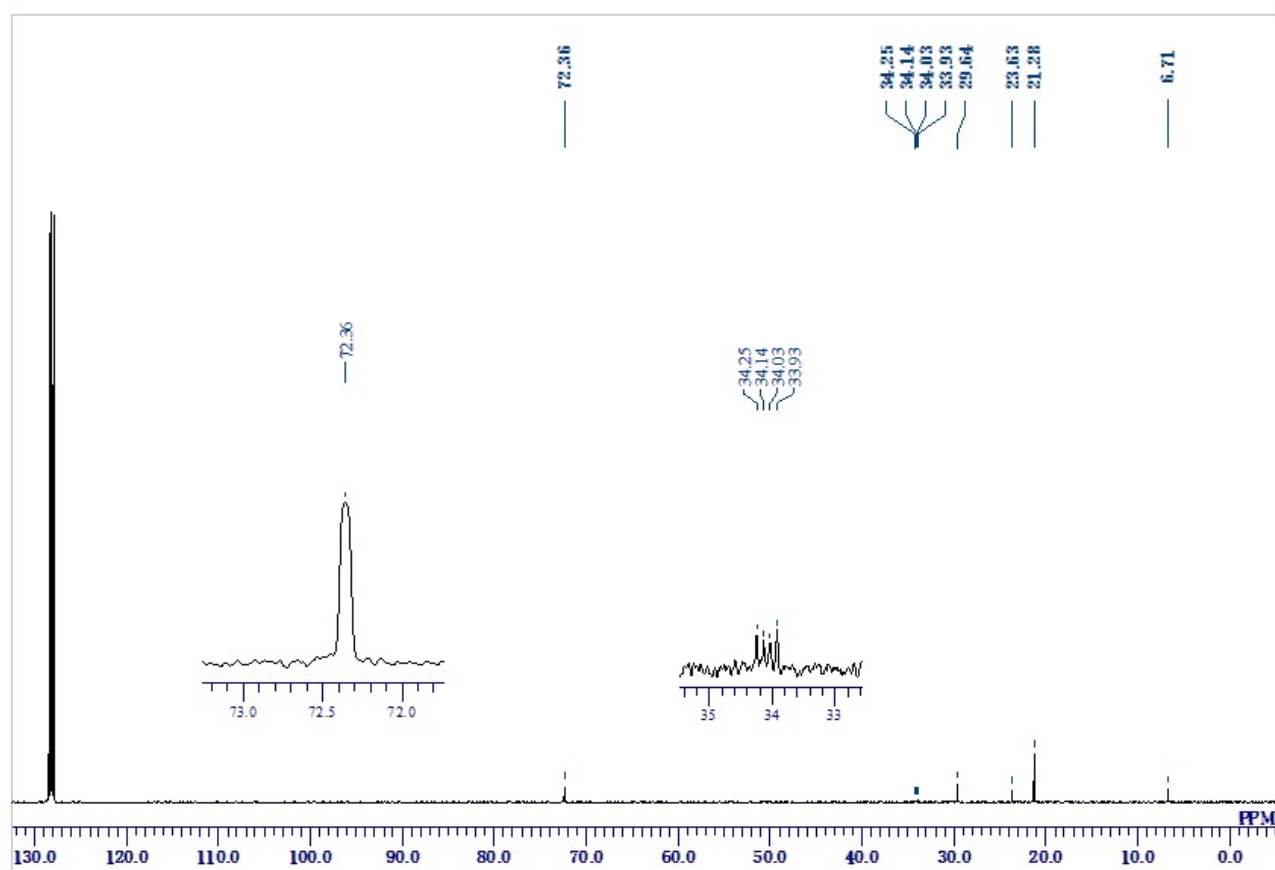

**Figure S4-3.**  $^{31}\text{P}\{^1\text{H}\}$  NMR spectrum of solution of **6** in  $\text{C}_6\text{D}_6$  at room temperature.

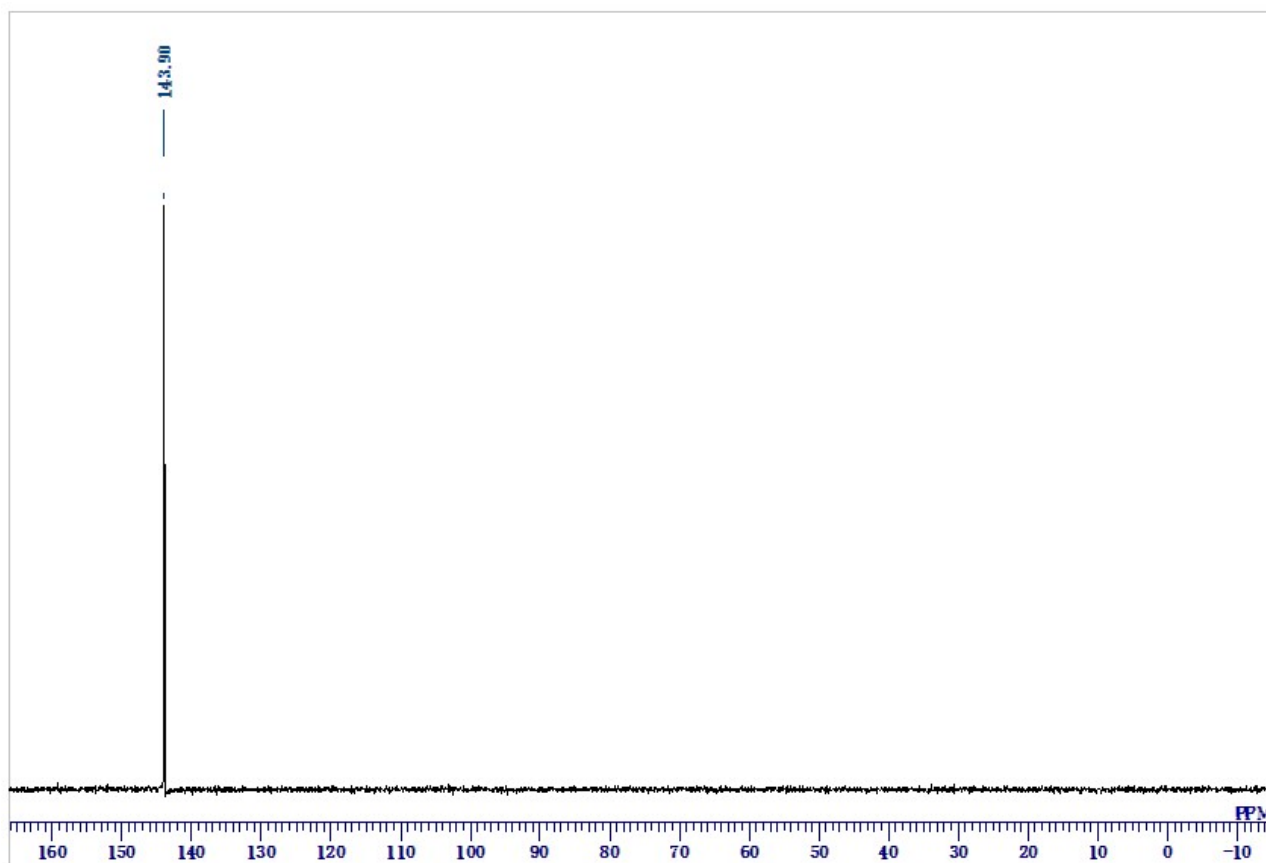

**Figure S5-1.**  $^1\text{H}$  NMR spectrum of *in situ* generated  $\text{Pd}(\text{trimethylolpropanephosphite})_4$  in  $\text{C}_6\text{D}_6$  at room temperature.

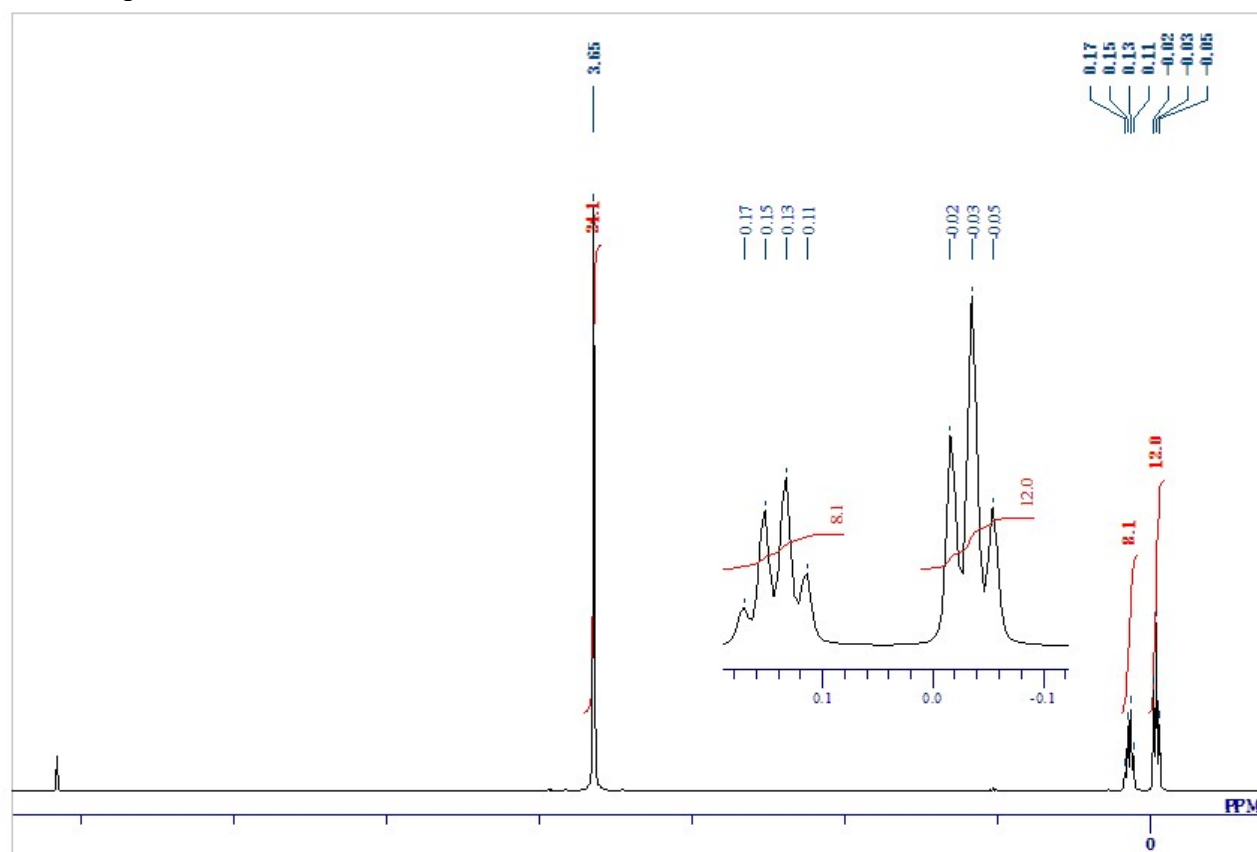

**Figure S5-2.**  $^{31}\text{P}\{^1\text{H}\}$  NMR spectrum of *in situ* generated  $\text{Pd}(\text{trimethylolpropanephosphite})_4$  in  $\text{C}_6\text{D}_6$  at room temperature.

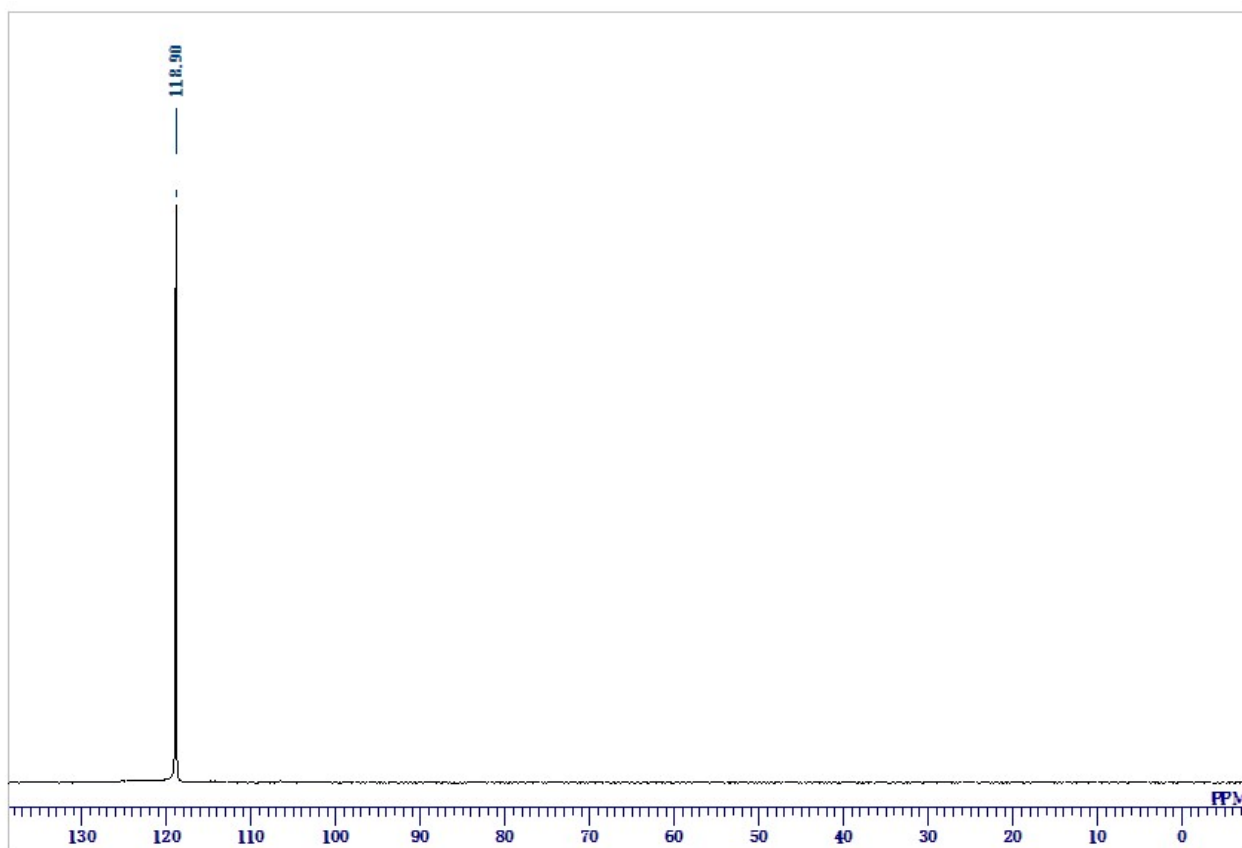

**Figure S6.** ATR-IR spectrum of **4** in the solid state.

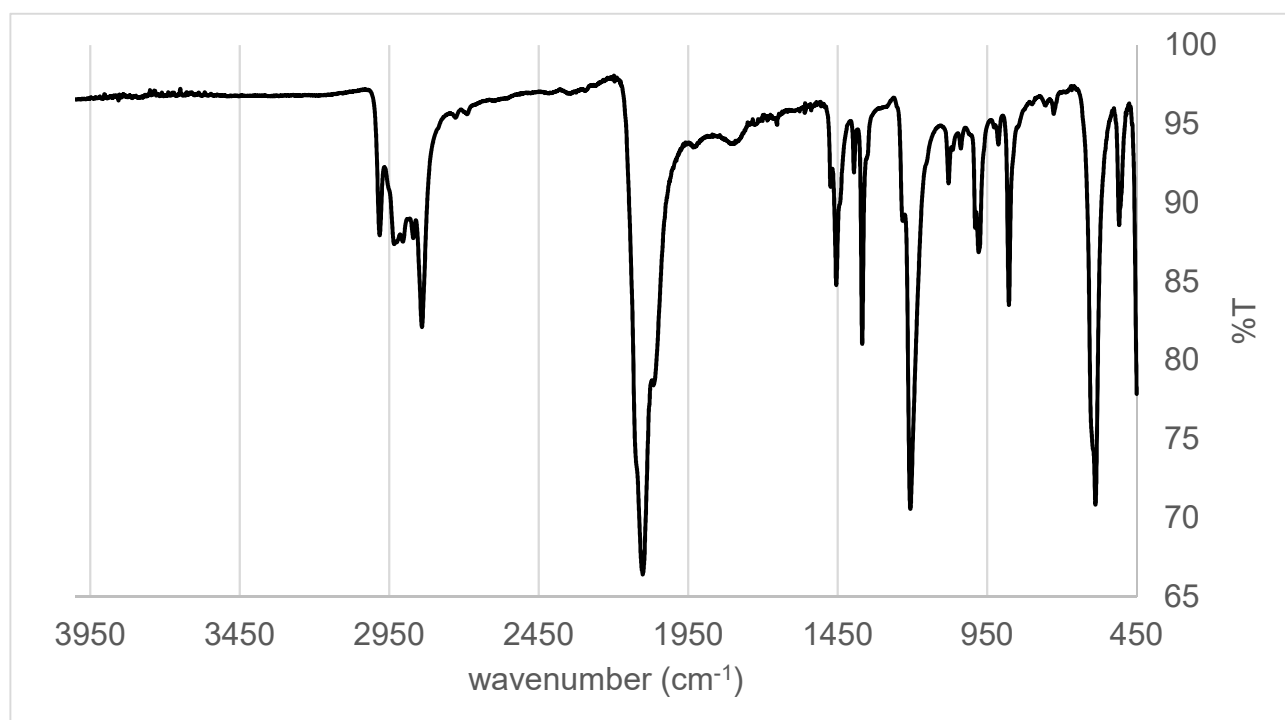

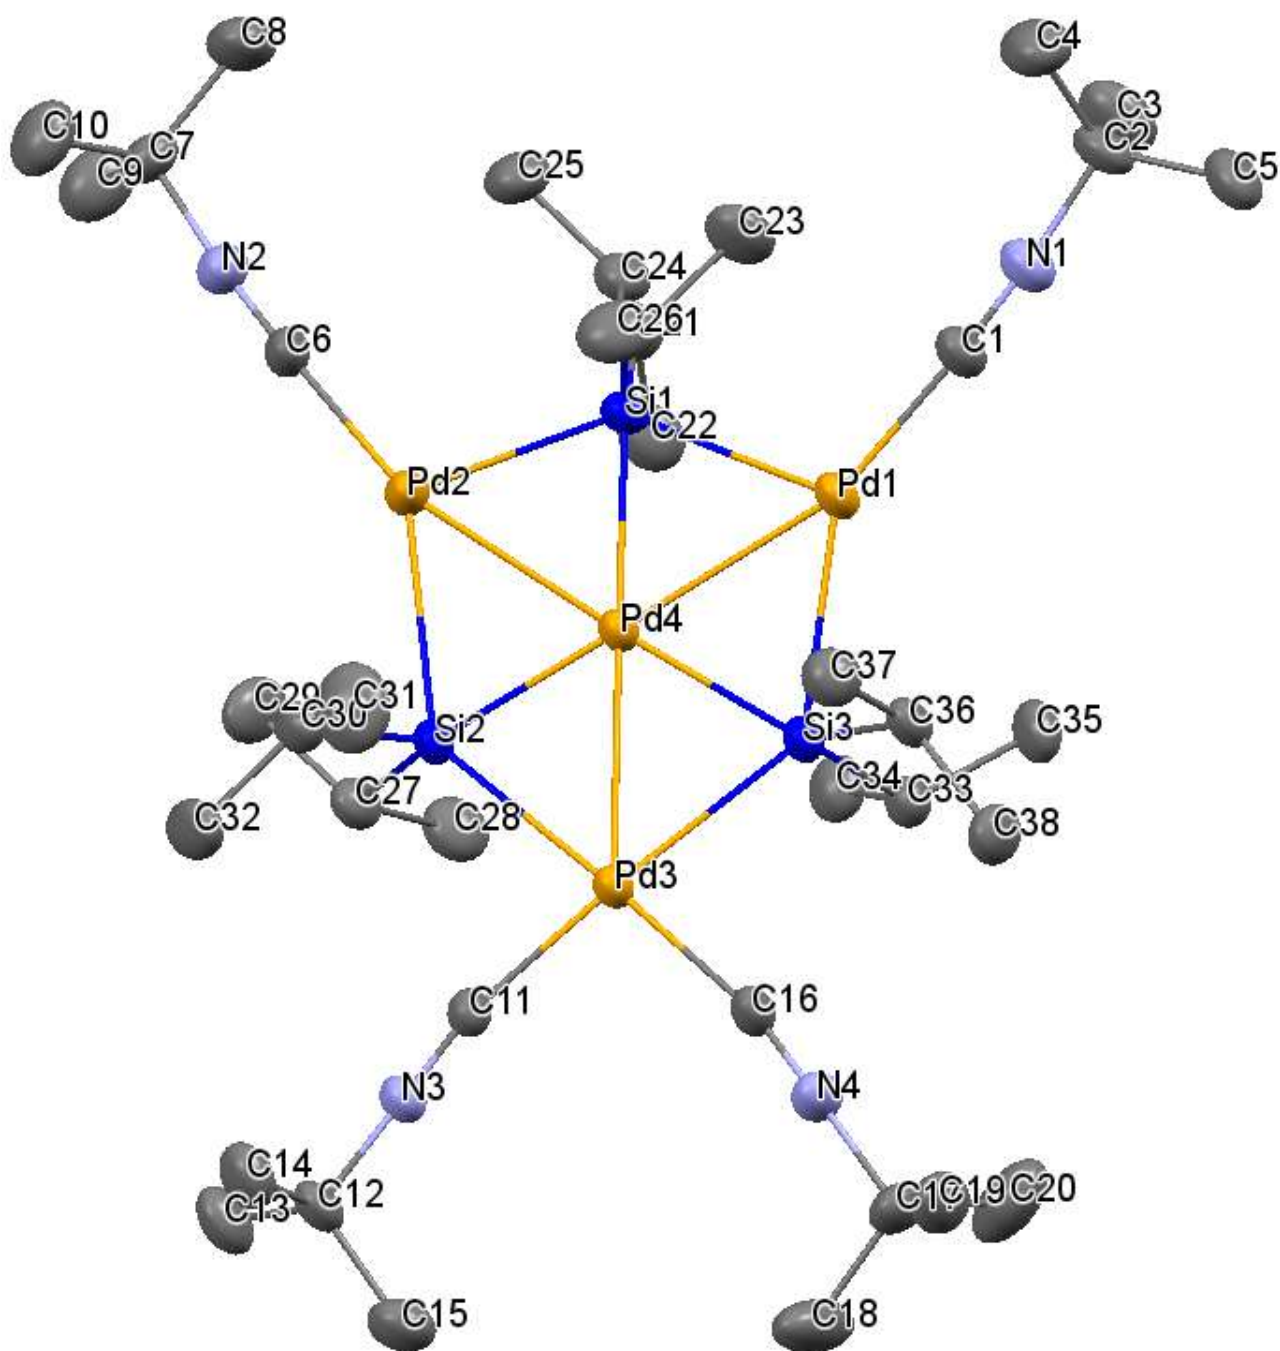

**Figure S7.** ORTEP drawing of **4** (50% probability of the thermal ellipsoids)

**Table S1-1.** Crystal data and structure refinement for **4**

|                                       |                                                                                                                                                                                             |
|---------------------------------------|---------------------------------------------------------------------------------------------------------------------------------------------------------------------------------------------|
| Empirical Formula                     | C <sub>38</sub> H <sub>78</sub> N <sub>4</sub> Pd <sub>4</sub> Si <sub>3</sub>                                                                                                              |
| Formula Weight                        | 1100.92                                                                                                                                                                                     |
| Crystal Color, Habit                  | yellow, block                                                                                                                                                                               |
| Crystal Dimensions                    | 0.150 X 0.100 X 0.080 mm                                                                                                                                                                    |
| Crystal System                        | monoclinic                                                                                                                                                                                  |
| Lattice Type                          | Primitive                                                                                                                                                                                   |
| Lattice Parameters                    | a = 10.8179(6) Å<br>b = 22.0783(12) Å<br>c = 22.8654(12) Å<br>β = 92.1391(12) °<br>V = 5457.4(5) Å <sup>3</sup>                                                                             |
| Space Group                           | P2 <sub>1</sub> /n (#14)                                                                                                                                                                    |
| Z value                               | 4                                                                                                                                                                                           |
| D <sub>calc</sub>                     | 1.340 g/cm <sup>3</sup>                                                                                                                                                                     |
| F <sub>000</sub>                      | 2240.00                                                                                                                                                                                     |
| μ(MoKα)                               | 13.888 cm <sup>-1</sup>                                                                                                                                                                     |
| Diffractometer                        | Saturn724                                                                                                                                                                                   |
| Radiation                             | MoKα (λ = 0.71075 Å)<br>multi-layer mirror monochromated                                                                                                                                    |
| Voltage, Current                      | 50kV, 40mA                                                                                                                                                                                  |
| Temperature                           | -80.0°C                                                                                                                                                                                     |
| Detector Aperture                     | 72.8 x 72.8 mm                                                                                                                                                                              |
| Data Images                           | 1080 exposures                                                                                                                                                                              |
| ω oscillation Range (χ=45.0, φ=270.0) | -105.0 - 75.0°                                                                                                                                                                              |
| Exposure Rate                         | 20.0 sec./°                                                                                                                                                                                 |
| Detector Swing Angle                  | -14.65°                                                                                                                                                                                     |
| ω oscillation Range (χ=45.0, φ=0.0)   | -105.0 - 75.0°                                                                                                                                                                              |
| Exposure Rate                         | 20.0 sec./°                                                                                                                                                                                 |
| Detector Swing Angle                  | -14.65°                                                                                                                                                                                     |
| ω oscillation Range (χ=45.0, φ=90.0)  | -105.0 - 75.0°                                                                                                                                                                              |
| Exposure Rate                         | 20.0 sec./°                                                                                                                                                                                 |
| Detector Swing Angle                  | -14.65°                                                                                                                                                                                     |
| Detector Position                     | 39.95 mm                                                                                                                                                                                    |
| Pixel Size                            | 0.070 mm                                                                                                                                                                                    |
| 2θ <sub>max</sub>                     | 55.0°                                                                                                                                                                                       |
| No. of Reflections Measured           | Total: 77678<br>Unique: 12489 (R <sub>int</sub> = 0.0336)                                                                                                                                   |
| Corrections                           | Lorentz-polarization<br>Absorption<br>(trans. factors: 0.784 - 0.895)                                                                                                                       |
| Structure Solution                    | Direct Methods (SIR2011)                                                                                                                                                                    |
| Refinement                            | Full-matrix least-squares on F <sup>2</sup>                                                                                                                                                 |
| Function Minimized                    | Σ w (F <sub>o</sub> <sup>2</sup> - F <sub>c</sub> <sup>2</sup> ) <sup>2</sup>                                                                                                               |
| Least Squares Weights                 | w = 1/ [ σ <sup>2</sup> (F <sub>o</sub> <sup>2</sup> ) + (0.0898 · P) <sup>2</sup><br>+ 12.9959 · P ]<br>where P = (Max(F <sub>o</sub> <sup>2</sup> , 0) + 2F <sub>c</sub> <sup>2</sup> )/3 |
| 2θ <sub>max</sub> cutoff              | 55.0°                                                                                                                                                                                       |
| Anomalous Dispersion                  | All non-hydrogen atoms                                                                                                                                                                      |
| No. Observations (All reflections)    | 12489                                                                                                                                                                                       |
| No. Variables                         | 470                                                                                                                                                                                         |
| Reflection/Parameter Ratio            | 26.57                                                                                                                                                                                       |
| Residuals: R1 (I>2.00σ(I))            | 0.0516                                                                                                                                                                                      |
| Residuals: R (All reflections)        | 0.0537                                                                                                                                                                                      |
| Residuals: wR2 (All reflections)      | 0.1518                                                                                                                                                                                      |
| Goodness of Fit Indicator             | 1.101                                                                                                                                                                                       |
| Max Shift/Error in Final Cycle        | 0.001                                                                                                                                                                                       |
| Maximum peak in Final Diff. Map       | 2.30 e <sup>-</sup> /Å <sup>3</sup>                                                                                                                                                         |
| Minimum peak in Final Diff. Map       | -0.81 e <sup>-</sup> /Å <sup>3</sup>                                                                                                                                                        |

**Table S1-2.** Atomic coordinates and B<sub>iso</sub>/B<sub>eq</sub>

| atom | x           | y           | z           | B <sub>eq</sub> | occ |
|------|-------------|-------------|-------------|-----------------|-----|
| Pd1  | 1.08441(3)  | 0.34714(2)  | 0.48005(2)  | 2.517(8)        | 1   |
| Pd2  | 1.07048(3)  | 0.37266(2)  | 0.28340(2)  | 3.175(9)        | 1   |
| Pd3  | 0.75754(3)  | 0.25373(2)  | 0.36938(2)  | 1.971(7)        | 1   |
| Pd4  | 0.97266(3)  | 0.32031(2)  | 0.37665(2)  | 1.969(7)        | 1   |
| Si1  | 1.14663(10) | 0.38090(5)  | 0.38460(5)  | 2.210(18)       | 1   |
| Si2  | 0.87993(10) | 0.29843(5)  | 0.28888(4)  | 1.982(17)       | 1   |
| Si3  | 0.89677(10) | 0.27737(5)  | 0.45803(5)  | 2.054(17)       | 1   |
| N1   | 1.2643(4)   | 0.40595(18) | 0.57413(17) | 2.90(6)         | 1   |
| N2   | 1.2513(4)   | 0.4418(2)   | 0.20325(17) | 3.24(7)         | 1   |
| N3   | 0.5613(3)   | 0.21551(17) | 0.27061(15) | 2.47(6)         | 1   |
| N4   | 0.5904(4)   | 0.1868(2)   | 0.45846(17) | 3.06(7)         | 1   |
| C1   | 1.1964(4)   | 0.3839(2)   | 0.54121(19) | 2.93(8)         | 1   |
| C2   | 1.3567(4)   | 0.4352(2)   | 0.6120(2)   | 2.99(8)         | 1   |
| C3   | 1.4753(5)   | 0.4003(3)   | 0.6076(3)   | 4.77(12)        | 1   |
| C4   | 1.3670(6)   | 0.5002(3)   | 0.5925(3)   | 4.80(12)        | 1   |
| C5   | 1.3108(5)   | 0.4322(3)   | 0.6742(2)   | 3.77(9)         | 1   |
| C6   | 1.1821(5)   | 0.4173(3)   | 0.2315(2)   | 3.57(10)        | 1   |
| C7   | 1.3455(4)   | 0.4732(2)   | 0.1715(2)   | 2.96(8)         | 1   |
| C8   | 1.4327(6)   | 0.5030(3)   | 0.2170(3)   | 5.12(14)        | 1   |
| C9   | 1.4126(6)   | 0.4268(3)   | 0.1353(3)   | 4.79(12)        | 1   |
| C10  | 1.2828(6)   | 0.5201(3)   | 0.1327(3)   | 4.53(11)        | 1   |
| C11  | 0.6409(4)   | 0.23184(19) | 0.30199(17) | 2.23(6)         | 1   |
| C12  | 0.4588(4)   | 0.1966(2)   | 0.23119(19) | 2.69(7)         | 1   |
| C13  | 0.5142(5)   | 0.1652(3)   | 0.1790(2)   | 3.83(10)        | 1   |
| C14  | 0.3880(5)   | 0.2531(3)   | 0.2112(2)   | 3.68(9)         | 1   |
| C15  | 0.3769(5)   | 0.1541(3)   | 0.2650(3)   | 3.86(10)        | 1   |
| C16  | 0.6572(4)   | 0.2139(2)   | 0.43111(18) | 2.61(7)         | 1   |
| C17  | 0.5060(5)   | 0.1500(3)   | 0.4923(2)   | 3.54(9)         | 1   |
| C18  | 0.4323(7)   | 0.1109(4)   | 0.4480(3)   | 6.22(19)        | 1   |
| C19  | 0.4202(5)   | 0.1927(3)   | 0.5240(2)   | 4.14(11)        | 1   |
| C20  | 0.5843(7)   | 0.1134(4)   | 0.5353(4)   | 6.10(18)        | 1   |
| C21  | 1.3134(4)   | 0.3531(2)   | 0.3779(2)   | 2.83(7)         | 1   |
| C22  | 1.3147(5)   | 0.2841(2)   | 0.3721(3)   | 3.66(9)         | 1   |
| C23  | 1.4036(5)   | 0.3724(3)   | 0.4273(3)   | 4.04(10)        | 1   |
| C24  | 1.1519(4)   | 0.4673(2)   | 0.3996(2)   | 2.93(7)         | 1   |
| C25  | 1.2219(5)   | 0.5038(2)   | 0.3549(3)   | 3.82(10)        | 1   |
| C26  | 1.0224(5)   | 0.4930(2)   | 0.4070(3)   | 4.31(11)        | 1   |
| C27  | 0.9335(4)   | 0.2356(2)   | 0.23814(19) | 2.66(7)         | 1   |
| C28  | 0.9978(5)   | 0.1844(2)   | 0.2728(2)   | 3.53(9)         | 1   |
| C29  | 1.0200(6)   | 0.2602(3)   | 0.1919(2)   | 4.12(11)        | 1   |
| C30  | 0.7910(4)   | 0.3554(2)   | 0.2407(2)   | 2.90(8)         | 1   |
| C31  | 0.7205(7)   | 0.3989(3)   | 0.2763(3)   | 5.36(14)        | 1   |
| C32  | 0.7120(6)   | 0.3297(3)   | 0.1892(3)   | 4.67(13)        | 1   |
| C33  | 0.9588(4)   | 0.2028(2)   | 0.49051(18) | 2.59(7)         | 1   |
| C34  | 1.0469(5)   | 0.1728(2)   | 0.4481(2)   | 3.44(9)         | 1   |
| C35  | 1.0273(5)   | 0.2115(2)   | 0.5501(2)   | 3.40(9)         | 1   |
| C36  | 0.8187(4)   | 0.3210(2)   | 0.51913(18) | 2.50(7)         | 1   |
| C37  | 0.7628(4)   | 0.3800(2)   | 0.4959(2)   | 3.10(8)         | 1   |
| C38  | 0.7269(5)   | 0.2874(3)   | 0.5561(2)   | 3.33(8)         | 1   |
| C39  | 0.7199(10)  | 0.5209(5)   | 0.0845(5)   | 3.72(18)        | 1/2 |
| C40  | 0.7284(10)  | 0.5698(5)   | 0.1230(5)   | 3.73(18)        | 1/2 |
| C41  | 0.8062(11)  | 0.5670(5)   | 0.1715(5)   | 3.98(19)        | 1/2 |
| C42  | 0.8842(12)  | 0.5173(6)   | 0.1833(6)   | 4.4(2)          | 1/2 |
| C43  | 0.8749(13)  | 0.4710(7)   | 0.1412(6)   | 5.2(3)          | 1/2 |
| C44  | 0.8008(9)   | 0.4701(4)   | 0.1045(4)   | 3.04(15)        | 1/2 |
| C45  | 0.6436(13)  | 0.5247(7)   | 0.0382(6)   | 5.1(3)          | 1/2 |

$$B_{eq} = 8/3 \pi^2 (U_{11}(aa^*)^2 + U_{22}(bb^*)^2 + U_{33}(cc^*)^2 + 2U_{12}(aa^*bb^*)\cos \gamma + 2U_{13}(aa^*cc^*)\cos \beta + 2U_{23}(bb^*cc^*)\cos \alpha)$$

**Table S1-3.** Anisotropic displacement parameters

| atom | U <sub>11</sub> | U <sub>22</sub> | U <sub>33</sub> | U <sub>12</sub> | U <sub>13</sub> | U <sub>23</sub> |
|------|-----------------|-----------------|-----------------|-----------------|-----------------|-----------------|
| Pd1  | 0.02821(18)     | 0.0446(2)       | 0.02250(16)     | -0.01021(13)    | -0.00339(12)    | -0.00255(12)    |
| Pd2  | 0.0398(2)       | 0.0565(2)       | 0.02411(17)     | -0.02397(16)    | -0.00301(14)    | 0.00626(14)     |
| Pd3  | 0.02163(16)     | 0.03306(17)     | 0.02005(15)     | -0.00557(11)    | -0.00122(11)    | -0.00019(10)    |
| Pd4  | 0.02231(16)     | 0.03282(17)     | 0.01951(15)     | -0.00602(11)    | -0.00139(11)    | -0.00014(10)    |
| Si1  | 0.0223(5)       | 0.0329(6)       | 0.0286(5)       | -0.0056(4)      | -0.0013(4)      | -0.0007(4)      |
| Si2  | 0.0239(5)       | 0.0316(5)       | 0.0196(5)       | -0.0030(4)      | -0.0017(4)      | 0.0001(4)       |
| Si3  | 0.0239(5)       | 0.0348(6)       | 0.0193(5)       | -0.0026(4)      | -0.0011(4)      | 0.0005(4)       |
| N1   | 0.0303(18)      | 0.043(2)        | 0.036(2)        | -0.0028(16)     | -0.0073(15)     | -0.0041(16)     |
| N2   | 0.039(2)        | 0.050(2)        | 0.0336(19)      | -0.0159(18)     | 0.0002(16)      | 0.0070(17)      |
| N3   | 0.0290(17)      | 0.0389(19)      | 0.0256(16)      | -0.0068(14)     | -0.0032(14)     | -0.0007(14)     |
| N4   | 0.0321(19)      | 0.055(2)        | 0.0292(19)      | -0.0143(17)     | 0.0041(15)      | 0.0011(17)      |
| C1   | 0.033(2)        | 0.050(3)        | 0.028(2)        | -0.0095(19)     | -0.0033(17)     | -0.0049(18)     |
| C2   | 0.032(2)        | 0.036(2)        | 0.044(3)        | -0.0033(18)     | -0.0133(19)     | -0.0079(19)     |
| C3   | 0.034(3)        | 0.080(4)        | 0.066(4)        | 0.008(3)        | -0.011(2)       | -0.016(3)       |
| C4   | 0.067(4)        | 0.048(3)        | 0.067(4)        | -0.018(3)       | -0.007(3)       | 0.009(3)        |
| C5   | 0.056(3)        | 0.048(3)        | 0.039(3)        | -0.006(2)       | -0.014(2)       | -0.006(2)       |
| C6   | 0.048(3)        | 0.063(3)        | 0.025(2)        | -0.026(2)       | -0.0035(19)     | 0.007(2)        |
| C7   | 0.033(2)        | 0.039(2)        | 0.040(2)        | -0.0065(18)     | 0.0076(18)      | 0.0093(19)      |
| C8   | 0.052(3)        | 0.081(4)        | 0.061(4)        | -0.033(3)       | -0.005(3)       | 0.008(3)        |
| C9   | 0.059(4)        | 0.056(3)        | 0.069(4)        | 0.009(3)        | 0.021(3)        | 0.006(3)        |
| C10  | 0.062(4)        | 0.055(3)        | 0.056(3)        | 0.007(3)        | 0.007(3)        | 0.020(3)        |
| C11  | 0.0280(19)      | 0.033(2)        | 0.0236(18)      | -0.0029(16)     | 0.0003(15)      | 0.0017(15)      |
| C12  | 0.027(2)        | 0.046(2)        | 0.028(2)        | -0.0048(18)     | -0.0069(16)     | -0.0065(18)     |
| C13  | 0.045(3)        | 0.067(3)        | 0.033(2)        | 0.001(2)        | -0.004(2)       | -0.015(2)       |
| C14  | 0.039(3)        | 0.062(3)        | 0.038(3)        | 0.003(2)        | -0.010(2)       | 0.001(2)        |
| C15  | 0.035(3)        | 0.056(3)        | 0.055(3)        | -0.012(2)       | -0.005(2)       | -0.004(2)       |
| C16  | 0.027(2)        | 0.048(2)        | 0.0230(18)      | -0.0075(18)     | -0.0019(15)     | 0.0005(17)      |
| C17  | 0.041(3)        | 0.057(3)        | 0.037(2)        | -0.019(2)       | 0.011(2)        | 0.005(2)        |
| C18  | 0.080(5)        | 0.094(5)        | 0.065(4)        | -0.054(4)       | 0.030(4)        | -0.022(4)       |
| C19  | 0.044(3)        | 0.077(4)        | 0.037(3)        | -0.016(3)       | 0.012(2)        | 0.001(2)        |
| C20  | 0.059(4)        | 0.092(5)        | 0.082(5)        | 0.002(4)        | 0.018(4)        | 0.046(4)        |
| C21  | 0.024(2)        | 0.047(2)        | 0.036(2)        | -0.0037(17)     | 0.0027(17)      | 0.0022(18)      |
| C22  | 0.036(2)        | 0.053(3)        | 0.051(3)        | 0.009(2)        | 0.004(2)        | -0.008(2)       |
| C23  | 0.025(2)        | 0.071(4)        | 0.056(3)        | -0.005(2)       | -0.006(2)       | -0.005(3)       |
| C24  | 0.038(2)        | 0.035(2)        | 0.038(2)        | -0.0070(18)     | -0.0035(18)     | -0.0026(18)     |
| C25  | 0.049(3)        | 0.043(3)        | 0.054(3)        | -0.015(2)       | 0.005(2)        | 0.006(2)        |
| C26  | 0.050(3)        | 0.037(3)        | 0.077(4)        | 0.002(2)        | 0.011(3)        | -0.001(3)       |
| C27  | 0.034(2)        | 0.041(2)        | 0.027(2)        | -0.0056(18)     | 0.0033(16)      | -0.0089(17)     |
| C28  | 0.045(3)        | 0.043(3)        | 0.047(3)        | 0.006(2)        | 0.002(2)        | -0.013(2)       |
| C29  | 0.062(3)        | 0.058(3)        | 0.039(3)        | -0.009(3)       | 0.027(3)        | -0.012(2)       |
| C30  | 0.033(2)        | 0.041(2)        | 0.036(2)        | -0.0053(18)     | -0.0077(18)     | 0.0086(18)      |
| C31  | 0.066(4)        | 0.064(4)        | 0.074(4)        | 0.032(3)        | -0.004(3)       | 0.011(3)        |
| C32  | 0.055(3)        | 0.068(4)        | 0.052(3)        | -0.018(3)       | -0.026(3)       | 0.024(3)        |
| C33  | 0.030(2)        | 0.041(2)        | 0.027(2)        | -0.0043(17)     | -0.0020(16)     | 0.0048(17)      |
| C34  | 0.046(3)        | 0.042(3)        | 0.042(3)        | 0.009(2)        | -0.001(2)       | 0.008(2)        |
| C35  | 0.048(3)        | 0.049(3)        | 0.032(2)        | 0.000(2)        | -0.011(2)       | 0.0070(19)      |
| C36  | 0.026(2)        | 0.046(2)        | 0.0221(18)      | -0.0063(17)     | -0.0012(15)     | -0.0044(16)     |
| C37  | 0.034(2)        | 0.042(2)        | 0.042(3)        | 0.0039(19)      | 0.0027(19)      | -0.0027(19)     |
| C38  | 0.042(3)        | 0.056(3)        | 0.030(2)        | -0.005(2)       | 0.0110(19)      | -0.002(2)       |

The general temperature factor expression:  $\exp(-2p^2(a^2U_{11}h^2 + b^2U_{22}k^2 + c^2U_{33}l^2 + 2a*b*U_{12}hk + 2a*c*U_{13}hl + 2b*c*U_{23}kl))$

**Table S1-4.** Bond lengths (Å)

| atom | atom | distance  | atom | atom | distance   |
|------|------|-----------|------|------|------------|
| Pd1  | Pd4  | 2.6812(6) | Pd1  | Si1  | 2.4252(12) |

|     |     |            |     |     |            |
|-----|-----|------------|-----|-----|------------|
| Pd1 | Si3 | 2.5827(12) | Pd1 | C1  | 1.988(4)   |
| Pd2 | Pd4 | 2.6778(6)  | Pd2 | Si1 | 2.4339(12) |
| Pd2 | Si2 | 2.6401(12) | Pd2 | C6  | 1.986(5)   |
| Pd3 | Pd4 | 2.7523(5)  | Pd3 | Si2 | 2.5094(11) |
| Pd3 | Si3 | 2.5341(12) | Pd3 | C11 | 2.014(4)   |
| Pd3 | C16 | 2.015(4)   | Pd4 | Si1 | 2.3106(12) |
| Pd4 | Si2 | 2.2621(10) | Pd4 | Si3 | 2.2692(12) |
| Si1 | C21 | 1.917(4)   | Si1 | C24 | 1.938(5)   |
| Si2 | C27 | 1.913(5)   | Si2 | C30 | 1.910(5)   |
| Si3 | C33 | 1.916(5)   | Si3 | C36 | 1.919(4)   |
| N1  | C1  | 1.142(6)   | N1  | C2  | 1.449(6)   |
| N2  | C6  | 1.143(7)   | N2  | C7  | 1.449(6)   |
| N3  | C11 | 1.158(5)   | N3  | C12 | 1.464(5)   |
| N4  | C16 | 1.141(6)   | N4  | C17 | 1.465(7)   |
| C2  | C3  | 1.503(8)   | C2  | C4  | 1.509(8)   |
| C2  | C5  | 1.525(7)   | C7  | C8  | 1.527(8)   |
| C7  | C9  | 1.520(8)   | C7  | C10 | 1.507(8)   |
| C12 | C13 | 1.523(7)   | C12 | C14 | 1.525(7)   |
| C12 | C15 | 1.520(7)   | C17 | C18 | 1.533(9)   |
| C17 | C19 | 1.524(8)   | C17 | C20 | 1.509(9)   |
| C21 | C22 | 1.531(7)   | C21 | C23 | 1.524(7)   |
| C24 | C25 | 1.527(7)   | C24 | C26 | 1.527(7)   |
| C27 | C28 | 1.532(7)   | C27 | C29 | 1.538(8)   |
| C30 | C31 | 1.487(9)   | C30 | C32 | 1.537(8)   |
| C33 | C34 | 1.535(7)   | C33 | C35 | 1.538(6)   |
| C36 | C37 | 1.523(7)   | C36 | C38 | 1.521(7)   |
| C39 | C40 | 1.394(16)  | C39 | C44 | 1.484(15)  |
| C39 | C45 | 1.319(18)  | C40 | C41 | 1.369(16)  |
| C41 | C42 | 1.405(17)  | C42 | C43 | 1.406(19)  |
| C43 | C44 | 1.138(17)  |     |     |            |

**Table S1-5.** Bond angles (°)

| atom | atom | atom | angle       | atom | atom | atom | angle      |
|------|------|------|-------------|------|------|------|------------|
| Pd4  | Pd1  | Si1  | 53.52(3)    | Pd4  | Pd1  | Si3  | 51.03(3)   |
| Pd4  | Pd1  | C1   | 162.37(14)  | Si1  | Pd1  | Si3  | 104.50(4)  |
| Si1  | Pd1  | C1   | 108.99(14)  | Si3  | Pd1  | C1   | 146.51(14) |
| Pd4  | Pd2  | Si1  | 53.49(3)    | Pd4  | Pd2  | Si2  | 50.34(2)   |
| Pd4  | Pd2  | C6   | 163.14(14)  | Si1  | Pd2  | Si2  | 103.79(4)  |
| Si1  | Pd2  | C6   | 109.81(14)  | Si2  | Pd2  | C6   | 146.08(14) |
| Pd4  | Pd3  | Si2  | 50.67(3)    | Pd4  | Pd3  | Si3  | 50.63(3)   |
| Pd4  | Pd3  | C11  | 132.73(12)  | Pd4  | Pd3  | C16  | 131.87(12) |
| Si2  | Pd3  | Si3  | 101.05(4)   | Si2  | Pd3  | C11  | 82.28(12)  |
| Si2  | Pd3  | C16  | 176.83(13)  | Si3  | Pd3  | C11  | 176.62(12) |
| Si3  | Pd3  | C16  | 81.33(12)   | C11  | Pd3  | C16  | 95.32(17)  |
| Pd1  | Pd4  | Pd2  | 115.354(18) | Pd1  | Pd4  | Pd3  | 121.58(2)  |
| Pd1  | Pd4  | Si1  | 57.56(3)    | Pd1  | Pd4  | Si2  | 179.32(3)  |
| Pd1  | Pd4  | Si3  | 62.24(3)    | Pd2  | Pd4  | Pd3  | 122.74(2)  |
| Pd2  | Pd4  | Si1  | 57.85(3)    | Pd2  | Pd4  | Si2  | 63.97(3)   |
| Pd2  | Pd4  | Si3  | 177.56(3)   | Pd3  | Pd4  | Si1  | 176.68(3)  |
| Pd3  | Pd4  | Si2  | 59.10(3)    | Pd3  | Pd4  | Si3  | 59.70(3)   |
| Si1  | Pd4  | Si2  | 121.76(4)   | Si1  | Pd4  | Si3  | 119.73(4)  |
| Si2  | Pd4  | Si3  | 118.44(4)   | Pd1  | Si1  | Pd2  | 137.49(5)  |
| Pd1  | Si1  | Pd4  | 68.92(3)    | Pd1  | Si1  | C21  | 105.49(15) |
| Pd1  | Si1  | C24  | 98.64(15)   | Pd2  | Si1  | Pd4  | 68.66(3)   |
| Pd2  | Si1  | C21  | 100.76(15)  | Pd2  | Si1  | C24  | 104.40(15) |
| Pd4  | Si1  | C21  | 125.09(15)  | Pd4  | Si1  | C24  | 127.02(15) |
| C21  | Si1  | C24  | 107.9(2)    | Pd2  | Si2  | Pd3  | 135.50(4)  |
| Pd2  | Si2  | Pd4  | 65.69(3)    | Pd2  | Si2  | C27  | 99.62(14)  |
| Pd2  | Si2  | C30  | 86.62(14)   | Pd3  | Si2  | Pd4  | 70.24(3)   |
| Pd3  | Si2  | C27  | 109.84(15)  | Pd3  | Si2  | C30  | 114.49(15) |

|     |     |     |            |     |     |     |            |
|-----|-----|-----|------------|-----|-----|-----|------------|
| Pd4 | Si2 | C27 | 123.97(14) | Pd4 | Si2 | C30 | 124.66(15) |
| C27 | Si2 | C30 | 106.6(2)   | Pd1 | Si3 | Pd3 | 135.90(5)  |
| Pd1 | Si3 | Pd4 | 66.73(3)   | Pd1 | Si3 | C33 | 100.10(14) |
| Pd1 | Si3 | C36 | 85.57(14)  | Pd3 | Si3 | Pd4 | 69.67(3)   |
| Pd3 | Si3 | C33 | 108.80(14) | Pd3 | Si3 | C36 | 114.91(13) |
| Pd4 | Si3 | C33 | 122.98(14) | Pd4 | Si3 | C36 | 124.75(15) |
| C33 | Si3 | C36 | 107.83(19) | C1  | N1  | C2  | 175.4(5)   |
| C6  | N2  | C7  | 175.4(5)   | C11 | N3  | C12 | 178.3(4)   |
| C16 | N4  | C17 | 177.8(5)   | Pd1 | C1  | N1  | 176.6(4)   |
| N1  | C2  | C3  | 107.7(4)   | N1  | C2  | C4  | 107.7(4)   |
| N1  | C2  | C5  | 107.3(4)   | C3  | C2  | C4  | 113.3(5)   |
| C3  | C2  | C5  | 110.4(4)   | C4  | C2  | C5  | 110.2(4)   |
| Pd2 | C6  | N2  | 176.6(5)   | N2  | C7  | C8  | 107.1(4)   |
| N2  | C7  | C9  | 108.0(4)   | N2  | C7  | C10 | 108.3(4)   |
| C8  | C7  | C9  | 111.5(5)   | C8  | C7  | C10 | 111.0(5)   |
| C9  | C7  | C10 | 110.8(5)   | Pd3 | C11 | N3  | 168.3(4)   |
| N3  | C12 | C13 | 107.5(4)   | N3  | C12 | C14 | 108.1(4)   |
| N3  | C12 | C15 | 107.8(4)   | C13 | C12 | C14 | 110.2(4)   |
| C13 | C12 | C15 | 111.8(4)   | C14 | C12 | C15 | 111.2(4)   |
| Pd3 | C16 | N4  | 168.7(4)   | N4  | C17 | C18 | 106.4(5)   |
| N4  | C17 | C19 | 108.1(4)   | N4  | C17 | C20 | 107.2(5)   |
| C18 | C17 | C19 | 110.6(5)   | C18 | C17 | C20 | 113.2(6)   |
| C19 | C17 | C20 | 111.1(5)   | Si1 | C21 | C22 | 109.7(3)   |
| Si1 | C21 | C23 | 115.5(3)   | C22 | C21 | C23 | 109.5(4)   |
| Si1 | C24 | C25 | 114.4(3)   | Si1 | C24 | C26 | 111.4(3)   |
| C25 | C24 | C26 | 110.9(4)   | Si2 | C27 | C28 | 111.3(3)   |
| Si2 | C27 | C29 | 111.5(3)   | C28 | C27 | C29 | 109.9(4)   |
| Si2 | C30 | C31 | 111.5(4)   | Si2 | C30 | C32 | 116.8(4)   |
| C31 | C30 | C32 | 112.1(5)   | Si3 | C33 | C34 | 110.0(3)   |
| Si3 | C33 | C35 | 112.7(3)   | C34 | C33 | C35 | 108.9(4)   |
| Si3 | C36 | C37 | 110.8(3)   | Si3 | C36 | C38 | 118.3(3)   |
| C37 | C36 | C38 | 110.6(4)   | C40 | C39 | C44 | 111.5(9)   |
| C40 | C39 | C45 | 118.7(11)  | C44 | C39 | C45 | 129.8(11)  |
| C39 | C40 | C41 | 120.1(10)  | C40 | C41 | C42 | 122.6(11)  |
| C41 | C42 | C43 | 114.1(11)  | C42 | C43 | C44 | 123.2(13)  |
| C39 | C44 | C43 | 127.2(11)  |     |     |     |            |

**Table S1-6.** Torsion Angles(°)

(Those having bond angles > 160 or < 20 degrees are excluded.)

| atom1 | atom2 | atom3 | atom4 | angle       | atom1 | atom2 | atom3 | atom4 | angle       |
|-------|-------|-------|-------|-------------|-------|-------|-------|-------|-------------|
| Pd4   | Pd1   | Si1   | Pd2   | 3.90(5)     | Pd4   | Pd1   | Si1   | Pd4   | 0.000(11)   |
| Pd4   | Pd1   | Si1   | C21   | -122.18(6)  | Pd4   | Pd1   | Si1   | C24   | 126.44(5)   |
| Si1   | Pd1   | Pd4   | Pd2   | -2.65(3)    | Si1   | Pd1   | Pd4   | Pd3   | -176.22(4)  |
| Si1   | Pd1   | Pd4   | Si1   | 0.00(3)     | Si1   | Pd1   | Pd4   | Si3   | 176.91(4)   |
| Pd4   | Pd1   | Si3   | Pd3   | -9.15(5)    | Pd4   | Pd1   | Si3   | Pd4   | 0.000(11)   |
| Pd4   | Pd1   | Si3   | C33   | 121.69(5)   | Pd4   | Pd1   | Si3   | C36   | -130.96(5)  |
| Si3   | Pd1   | Pd4   | Pd2   | -179.55(4)  | Si3   | Pd1   | Pd4   | Pd3   | 6.87(3)     |
| Si3   | Pd1   | Pd4   | Si1   | -176.91(4)  | Si3   | Pd1   | Pd4   | Si3   | -0.00(3)    |
| Si1   | Pd1   | Si3   | Pd3   | -11.72(8)   | Si1   | Pd1   | Si3   | Pd4   | -2.57(4)    |
| Si1   | Pd1   | Si3   | C33   | 119.12(5)   | Si1   | Pd1   | Si3   | C36   | -133.53(4)  |
| Si3   | Pd1   | Si1   | Pd2   | 6.38(8)     | Si3   | Pd1   | Si1   | Pd4   | 2.48(4)     |
| Si3   | Pd1   | Si1   | C21   | -119.69(5)  | Si3   | Pd1   | Si1   | C24   | 128.93(4)   |
| C1    | Pd1   | Si1   | Pd2   | -173.57(16) | C1    | Pd1   | Si1   | Pd4   | -177.47(15) |
| C1    | Pd1   | Si1   | C21   | 60.35(16)   | C1    | Pd1   | Si1   | C24   | -51.03(16)  |
| C1    | Pd1   | Si3   | Pd3   | 168.2(3)    | C1    | Pd1   | Si3   | Pd4   | 177.4(3)    |
| C1    | Pd1   | Si3   | C33   | -61.0(3)    | C1    | Pd1   | Si3   | C36   | 46.4(3)     |
| Pd4   | Pd2   | Si1   | Pd1   | -3.90(5)    | Pd4   | Pd2   | Si1   | Pd4   | -0.000(11)  |
| Pd4   | Pd2   | Si1   | C21   | 123.64(5)   | Pd4   | Pd2   | Si1   | C24   | -124.54(5)  |
| Si1   | Pd2   | Pd4   | Pd1   | 2.64(3)     | Si1   | Pd2   | Pd4   | Pd3   | 176.13(4)   |
| Si1   | Pd2   | Pd4   | Si1   | 0.00(3)     | Si1   | Pd2   | Pd4   | Si2   | -177.40(4)  |

|     |     |     |     |             |     |     |     |     |             |
|-----|-----|-----|-----|-------------|-----|-----|-----|-----|-------------|
| Pd4 | Pd2 | Si2 | Pd3 | 8.53(4)     | Pd4 | Pd2 | Si2 | Pd4 | -0.000(11)  |
| Pd4 | Pd2 | Si2 | C27 | -123.05(5)  | Pd4 | Pd2 | Si2 | C30 | 130.68(5)   |
| Si2 | Pd2 | Pd4 | Pd1 | -179.96(4)  | Si2 | Pd2 | Pd4 | Pd3 | -6.47(3)    |
| Si2 | Pd2 | Pd4 | Si1 | 177.40(4)   | Si2 | Pd2 | Pd4 | Si2 | -0.00(3)    |
| Si1 | Pd2 | Si2 | Pd3 | 10.69(7)    | Si1 | Pd2 | Si2 | Pd4 | 2.15(4)     |
| Si1 | Pd2 | Si2 | C27 | -120.89(4)  | Si1 | Pd2 | Si2 | C30 | 132.84(4)   |
| Si2 | Pd2 | Si1 | Pd1 | -5.97(8)    | Si2 | Pd2 | Si1 | Pd4 | -2.06(4)    |
| Si2 | Pd2 | Si1 | C21 | 121.58(4)   | Si2 | Pd2 | Si1 | C24 | -126.60(5)  |
| C6  | Pd2 | Si1 | Pd1 | 178.75(18)  | C6  | Pd2 | Si1 | Pd4 | -177.35(17) |
| C6  | Pd2 | Si1 | C21 | -53.71(18)  | C6  | Pd2 | Si1 | C24 | 58.11(18)   |
| C6  | Pd2 | Si2 | Pd3 | -177.3(3)   | C6  | Pd2 | Si2 | Pd4 | 174.2(3)    |
| C6  | Pd2 | Si2 | C27 | 51.1(3)     | C6  | Pd2 | Si2 | C30 | -55.1(3)    |
| Pd4 | Pd3 | Si2 | Pd2 | -8.26(4)    | Pd4 | Pd3 | Si2 | Pd4 | -0.000(11)  |
| Pd4 | Pd3 | Si2 | C27 | 120.11(6)   | Pd4 | Pd3 | Si2 | C30 | -120.03(6)  |
| Si2 | Pd3 | Pd4 | Pd1 | 179.87(4)   | Si2 | Pd3 | Pd4 | Pd2 | 6.78(4)     |
| Si2 | Pd3 | Pd4 | Si2 | -0.00(3)    | Si2 | Pd3 | Pd4 | Si3 | -173.08(4)  |
| Pd4 | Pd3 | Si3 | Pd1 | 8.97(4)     | Pd4 | Pd3 | Si3 | Pd4 | 0.000(11)   |
| Pd4 | Pd3 | Si3 | C33 | -119.15(6)  | Pd4 | Pd3 | Si3 | C36 | 119.87(6)   |
| Si3 | Pd3 | Pd4 | Pd1 | -7.04(3)    | Si3 | Pd3 | Pd4 | Pd2 | 179.86(4)   |
| Si3 | Pd3 | Pd4 | Si2 | 173.08(4)   | Si3 | Pd3 | Pd4 | Si3 | 0.00(3)     |
| C11 | Pd3 | Pd4 | Pd1 | 173.31(16)  | C11 | Pd3 | Pd4 | Pd2 | 0.21(17)    |
| C11 | Pd3 | Pd4 | Si2 | -6.57(16)   | C11 | Pd3 | Pd4 | Si3 | -179.65(16) |
| C16 | Pd3 | Pd4 | Pd1 | -2.64(18)   | C16 | Pd3 | Pd4 | Pd2 | -175.73(17) |
| C16 | Pd3 | Pd4 | Si2 | 177.49(18)  | C16 | Pd3 | Pd4 | Si3 | 4.40(17)    |
| Si2 | Pd3 | Si3 | Pd1 | 14.41(7)    | Si2 | Pd3 | Si3 | Pd4 | 5.45(4)     |
| Si2 | Pd3 | Si3 | C33 | -113.70(5)  | Si2 | Pd3 | Si3 | C36 | 125.32(5)   |
| Si3 | Pd3 | Si2 | Pd2 | -13.70(7)   | Si3 | Pd3 | Si2 | Pd4 | -5.44(4)    |
| Si3 | Pd3 | Si2 | C27 | 114.66(5)   | Si3 | Pd3 | Si2 | C30 | -125.48(5)  |
| C11 | Pd3 | Si2 | Pd2 | 166.88(14)  | C11 | Pd3 | Si2 | Pd4 | 175.14(12)  |
| C11 | Pd3 | Si2 | C27 | -64.76(13)  | C11 | Pd3 | Si2 | C30 | 55.11(13)   |
| C16 | Pd3 | Si3 | Pd1 | -167.72(15) | C16 | Pd3 | Si3 | Pd4 | -176.68(13) |
| C16 | Pd3 | Si3 | C33 | 64.16(14)   | C16 | Pd3 | Si3 | C36 | -56.81(14)  |
| Pd1 | Pd4 | Si1 | Pd1 | -0.000(10)  | Pd1 | Pd4 | Si1 | Pd2 | -177.17(4)  |
| Pd1 | Pd4 | Si1 | C21 | 94.52(7)    | Pd1 | Pd4 | Si1 | C24 | -84.89(7)   |
| Pd1 | Pd4 | Si3 | Pd1 | -0.0        | Pd1 | Pd4 | Si3 | Pd3 | 173.22(3)   |
| Pd1 | Pd4 | Si3 | C33 | -87.04(6)   | Pd1 | Pd4 | Si3 | C36 | 66.39(6)    |
| Pd2 | Pd4 | Si1 | Pd1 | 177.17(4)   | Pd2 | Pd4 | Si1 | Pd2 | -0.000(10)  |
| Pd2 | Pd4 | Si1 | C21 | -88.30(7)   | Pd2 | Pd4 | Si1 | C24 | 92.28(7)    |
| Pd2 | Pd4 | Si2 | Pd2 | -0.0        | Pd2 | Pd4 | Si2 | Pd3 | -173.66(3)  |
| Pd2 | Pd4 | Si2 | C27 | 85.23(6)    | Pd2 | Pd4 | Si2 | C30 | -66.98(6)   |
| Pd3 | Pd4 | Si2 | Pd2 | 173.66(3)   | Pd3 | Pd4 | Si2 | Pd3 | 0.000(10)   |
| Pd3 | Pd4 | Si2 | C27 | -101.12(6)  | Pd3 | Pd4 | Si2 | C30 | 106.68(7)   |
| Pd3 | Pd4 | Si3 | Pd1 | -173.22(3)  | Pd3 | Pd4 | Si3 | Pd3 | -0.000(10)  |
| Pd3 | Pd4 | Si3 | C33 | 99.74(6)    | Pd3 | Pd4 | Si3 | C36 | -106.83(7)  |
| Si1 | Pd4 | Si2 | Pd2 | -2.59(5)    | Si1 | Pd4 | Si2 | Pd3 | -176.25(4)  |
| Si1 | Pd4 | Si2 | C27 | 82.63(7)    | Si1 | Pd4 | Si2 | C30 | -69.57(8)   |
| Si2 | Pd4 | Si1 | Pd1 | 179.92(4)   | Si2 | Pd4 | Si1 | Pd2 | 2.75(5)     |
| Si2 | Pd4 | Si1 | C21 | -85.55(8)   | Si2 | Pd4 | Si1 | C24 | 95.03(8)    |
| Si1 | Pd4 | Si3 | Pd1 | 3.01(5)     | Si1 | Pd4 | Si3 | Pd3 | 176.23(4)   |
| Si1 | Pd4 | Si3 | C33 | -84.03(7)   | Si1 | Pd4 | Si3 | C36 | 69.39(7)    |
| Si3 | Pd4 | Si1 | Pd1 | -3.15(5)    | Si3 | Pd4 | Si1 | Pd2 | 179.67(4)   |
| Si3 | Pd4 | Si1 | C21 | 91.37(7)    | Si3 | Pd4 | Si1 | C24 | -88.05(8)   |
| Si2 | Pd4 | Si3 | Pd1 | -179.97(4)  | Si2 | Pd4 | Si3 | Pd3 | -6.75(5)    |
| Si2 | Pd4 | Si3 | C33 | 92.99(7)    | Si2 | Pd4 | Si3 | C36 | -113.58(7)  |
| Si3 | Pd4 | Si2 | Pd2 | -179.55(4)  | Si3 | Pd4 | Si2 | Pd3 | 6.79(5)     |
| Si3 | Pd4 | Si2 | C27 | -94.33(7)   | Si3 | Pd4 | Si2 | C30 | 113.47(6)   |
| Pd1 | Si1 | C21 | C22 | 69.7(3)     | Pd1 | Si1 | C21 | C23 | -54.6(3)    |
| Pd1 | Si1 | C24 | C25 | 163.9(2)    | Pd1 | Si1 | C24 | C26 | -69.2(3)    |
| Pd2 | Si1 | C21 | C22 | -76.5(3)    | Pd2 | Si1 | C21 | C23 | 159.2(2)    |
| Pd2 | Si1 | C24 | C25 | -52.1(3)    | Pd2 | Si1 | C24 | C26 | 74.7(3)     |

|     |     |     |     |           |     |     |     |     |             |
|-----|-----|-----|-----|-----------|-----|-----|-----|-----|-------------|
| Pd4 | Si1 | C21 | C22 | -5.1(3)   | Pd4 | Si1 | C21 | C23 | -129.4(2)   |
| Pd4 | Si1 | C24 | C25 | -126.0(2) | Pd4 | Si1 | C24 | C26 | 0.8(4)      |
| C21 | Si1 | C24 | C25 | 54.5(3)   | C21 | Si1 | C24 | C26 | -178.7(3)   |
| C24 | Si1 | C21 | C22 | 174.4(2)  | C24 | Si1 | C21 | C23 | 50.1(3)     |
| Pd2 | Si2 | C27 | C28 | 95.1(2)   | Pd2 | Si2 | C27 | C29 | -28.0(3)    |
| Pd2 | Si2 | C30 | C31 | -94.0(2)  | Pd2 | Si2 | C30 | C32 | 135.3(3)    |
| Pd3 | Si2 | C27 | C28 | -51.0(3)  | Pd3 | Si2 | C27 | C29 | -174.16(18) |
| Pd3 | Si2 | C30 | C31 | 45.3(3)   | Pd3 | Si2 | C30 | C32 | -85.4(3)    |
| Pd4 | Si2 | C27 | C28 | 28.0(3)   | Pd4 | Si2 | C27 | C29 | -95.1(2)    |
| Pd4 | Si2 | C30 | C31 | -36.8(3)  | Pd4 | Si2 | C30 | C32 | -167.57(18) |
| C27 | Si2 | C30 | C31 | 167.0(3)  | C27 | Si2 | C30 | C32 | 36.2(3)     |
| C30 | Si2 | C27 | C28 | -175.6(2) | C30 | Si2 | C27 | C29 | 61.3(3)     |
| Pd1 | Si3 | C33 | C34 | -78.7(2)  | Pd1 | Si3 | C33 | C35 | 43.0(3)     |
| Pd1 | Si3 | C36 | C37 | 82.9(2)   | Pd1 | Si3 | C36 | C38 | -147.9(3)   |
| Pd3 | Si3 | C33 | C34 | 67.5(2)   | Pd3 | Si3 | C33 | C35 | -170.77(19) |
| Pd3 | Si3 | C36 | C37 | -56.4(3)  | Pd3 | Si3 | C36 | C38 | 72.8(3)     |
| Pd4 | Si3 | C33 | C34 | -10.0(3)  | Pd4 | Si3 | C33 | C35 | 111.7(2)    |
| Pd4 | Si3 | C36 | C37 | 25.3(3)   | Pd4 | Si3 | C36 | C38 | 154.47(18)  |
| C33 | Si3 | C36 | C37 | -178.0(2) | C33 | Si3 | C36 | C38 | -48.7(3)    |
| C36 | Si3 | C33 | C34 | -167.3(2) | C36 | Si3 | C33 | C35 | -45.5(3)    |
| C40 | C39 | C44 | C43 | -10.7(15) | C44 | C39 | C40 | C41 | 1.0(14)     |
| C45 | C39 | C40 | C41 | 179.7(11) | C45 | C39 | C44 | C43 | 170.8(12)   |
| C39 | C40 | C41 | C42 | 3.1(17)   | C40 | C41 | C42 | C43 | -0.0(17)    |
| C41 | C42 | C43 | C44 | -9(2)     | C42 | C43 | C44 | C39 | 15(2)       |

**Table S1-7.** Least Squares Planes

----- Plane number 1 -----

| Atoms Defining Plane | Distance | esd    |
|----------------------|----------|--------|
| Pd1 [ 1; 0; 0; 0]    | 0.0280   | 0.0006 |
| Pd2 [ 1; 0; 0; 0]    | 0.0276   | 0.0006 |
| Pd3 [ 1; 0; 0; 0]    | 0.0456   | 0.0006 |
| Pd4 [ 1; 0; 0; 0]    | -0.0560  | 0.0005 |
| Si1 [ 1; 0; 0; 0]    | -0.0109  | 0.0012 |
| Si2 [ 1; 0; 0; 0]    | -0.1243  | 0.0012 |
| Si3 [ 1; 0; 0; 0]    | -0.1378  | 0.0012 |

Least-squares plane

$$-6.14739x + 18.03153y + 2.77755z = 0.89857$$

(0.00113) (0.00162) (0.00306) (0.00196)

Mean deviation from plane is 0.0615 angstrom

Weight scheme: Sigma Weights

Chi-squared: 61941.881

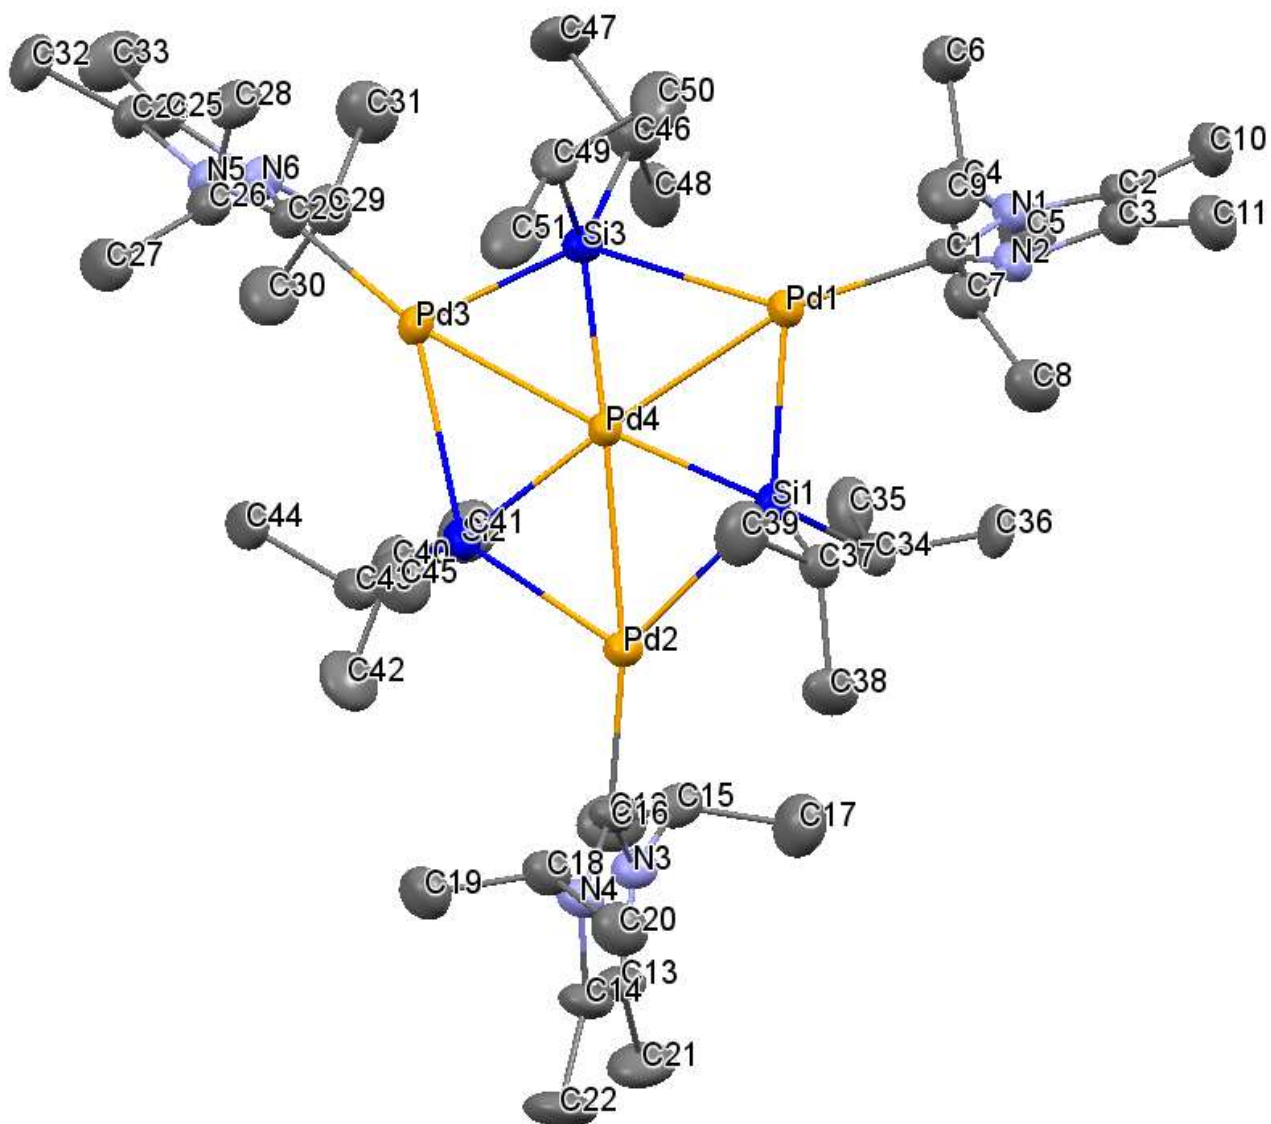

**Figure S8.** ORTEP drawing of **5** (50% probability of the thermal ellipsoids)

**Table S2-1.** Crystal data and structure refinement for **5**

|                                                           |                                                                                                                                                                       |
|-----------------------------------------------------------|-----------------------------------------------------------------------------------------------------------------------------------------------------------------------|
| Empirical Formula                                         | C <sub>51</sub> H <sub>100</sub> N <sub>6</sub> Pd <sub>4</sub> Si <sub>3</sub>                                                                                       |
| Formula Weight                                            | 1307.25                                                                                                                                                               |
| Crystal Color, Habit                                      | red, block                                                                                                                                                            |
| Crystal Dimensions                                        | 0.100 X 0.050 X 0.050 mm                                                                                                                                              |
| Crystal System                                            | triclinic                                                                                                                                                             |
| Lattice Type                                              | Primitive                                                                                                                                                             |
| Lattice Parameters                                        | a = 14.505(3) Å<br>b = 15.339(4) Å<br>c = 15.655(4) Å<br>$\alpha$ = 89.593(12) °<br>$\beta$ = 63.724(6) °<br>$\gamma$ = 81.301(11) °<br>V = 3080.2(13) Å <sup>3</sup> |
| Space Group                                               | P-1 (#2)                                                                                                                                                              |
| Z value                                                   | 2                                                                                                                                                                     |
| D <sub>calc</sub>                                         | 1.409 g/cm <sup>3</sup>                                                                                                                                               |
| F <sub>000</sub>                                          | 1348.00                                                                                                                                                               |
| $\mu$ (MoK $\alpha$ )                                     | 12.434 cm <sup>-1</sup>                                                                                                                                               |
| Diffractometer                                            | Saturn724                                                                                                                                                             |
| Radiation                                                 | MoK $\alpha$ ( $\lambda$ = 0.71075 Å)<br>multi-layer mirror monochromated                                                                                             |
| Voltage, Current                                          | 50kV, 24mA                                                                                                                                                            |
| Temperature                                               | -79.8°C                                                                                                                                                               |
| Detector Aperture                                         | 72.8 x 72.8 mm                                                                                                                                                        |
| Data Images                                               | 1080 exposures                                                                                                                                                        |
| $\omega$ oscillation Range ( $\chi$ =45.0, $\phi$ =0.0)   | -70.0 - 110.0°                                                                                                                                                        |
| Exposure Rate                                             | 10.0 sec./°                                                                                                                                                           |
| Detector Swing Angle                                      | 19.98°                                                                                                                                                                |
| $\omega$ oscillation Range ( $\chi$ =45.0, $\phi$ =90.0)  | -70.0 - 110.0°                                                                                                                                                        |
| Exposure Rate                                             | 10.0 sec./°                                                                                                                                                           |
| Detector Swing Angle                                      | 19.98°                                                                                                                                                                |
| $\omega$ oscillation Range ( $\chi$ =45.0, $\phi$ =180.0) | -70.0 - 110.0°                                                                                                                                                        |
| Exposure Rate                                             | 10.0 sec./°                                                                                                                                                           |
| Detector Swing Angle                                      | 19.98°                                                                                                                                                                |
| Detector Position                                         | 44.77 mm                                                                                                                                                              |
| Pixel Size                                                | 0.141 mm                                                                                                                                                              |
| 2 $\theta$ <sub>max</sub>                                 | 55.0°                                                                                                                                                                 |
| No. of Reflections Measured                               | Total: 38434<br>Unique: 14053 (R <sub>int</sub> = 0.0393)                                                                                                             |
| Corrections                                               | Lorentz-polarization<br>Absorption<br>(trans. factors: 0.863 - 0.940)                                                                                                 |
| Structure Solution                                        | Direct Methods (SIR2011)                                                                                                                                              |
| Refinement                                                | Full-matrix least-squares on F <sup>2</sup>                                                                                                                           |
| Function Minimized                                        | $\sum w (F_o^2 - F_c^2)^2$                                                                                                                                            |
| Least Squares Weights                                     | $w = 1 / [ \sigma^2(F_o^2) + (0.0453 \cdot P)^2 + 1.3612 \cdot P ]$<br>where P = (Max(F <sub>o</sub> <sup>2</sup> , 0) + 2F <sub>c</sub> <sup>2</sup> )/3             |
| 2 $\theta$ <sub>max</sub> cutoff                          | 55.0°                                                                                                                                                                 |
| Anomalous Dispersion                                      | All non-hydrogen atoms                                                                                                                                                |
| No. Observations (All reflections)                        | 14053                                                                                                                                                                 |
| No. Variables                                             | 577                                                                                                                                                                   |
| Reflection/Parameter Ratio                                | 24.36                                                                                                                                                                 |
| Residuals: R1 (I>2.00 $\sigma$ (I))                       | 0.0439                                                                                                                                                                |
| Residuals: R (All reflections)                            | 0.0585                                                                                                                                                                |
| Residuals: wR2 (All reflections)                          | 0.1016                                                                                                                                                                |
| Goodness of Fit Indicator                                 | 1.076                                                                                                                                                                 |
| Max Shift/Error in Final Cycle                            | 0.002                                                                                                                                                                 |
| Maximum peak in Final Diff. Map                           | 1.05 e <sup>-</sup> /Å <sup>3</sup>                                                                                                                                   |
| Minimum peak in Final Diff. Map                           | -0.67 e <sup>-</sup> /Å <sup>3</sup>                                                                                                                                  |

**Table S2-2.** Atomic coordinates and B<sub>iso</sub>/B<sub>eq</sub>

| atom | x          | y          | z          | B <sub>eq</sub> |
|------|------------|------------|------------|-----------------|
| Pd1  | 0.38085(2) | 0.88810(2) | 0.27741(2) | 1.924(6)        |
| Pd2  | 0.23736(2) | 0.75487(2) | 0.56677(2) | 1.862(6)        |
| Pd3  | 0.15184(2) | 0.68954(2) | 0.32153(2) | 1.875(6)        |
| Pd4  | 0.24908(2) | 0.78344(2) | 0.39219(2) | 1.753(6)        |
| Si1  | 0.34369(8) | 0.86013(7) | 0.43732(7) | 1.767(17)       |
| Si2  | 0.14246(8) | 0.69797(7) | 0.49529(7) | 1.933(17)       |
| Si3  | 0.26036(8) | 0.79491(7) | 0.24397(7) | 2.095(18)       |
| N1   | 0.6012(2)  | 0.9271(2)  | 0.1542(2)  | 2.31(6)         |
| N2   | 0.5021(3)  | 1.0479(2)  | 0.2301(2)  | 2.30(6)         |
| N3   | 0.2763(3)  | 0.6487(2)  | 0.7205(2)  | 2.29(6)         |
| N4   | 0.1412(3)  | 0.7496(2)  | 0.7870(2)  | 2.40(6)         |
| N5   | 0.0057(3)  | 0.6498(2)  | 0.2350(2)  | 2.25(6)         |
| N6   | 0.1373(3)  | 0.5456(2)  | 0.1918(2)  | 2.23(6)         |
| C1   | 0.5009(3)  | 0.9609(3)  | 0.2157(3)  | 2.09(6)         |
| C2   | 0.6646(3)  | 0.9931(3)  | 0.1304(3)  | 2.80(8)         |
| C3   | 0.6024(3)  | 1.0683(3)  | 0.1785(3)  | 2.80(8)         |
| C4   | 0.6279(3)  | 0.8357(3)  | 0.1139(3)  | 2.71(7)         |
| C5   | 0.7190(4)  | 0.7818(3)  | 0.1253(4)  | 4.08(10)        |
| C6   | 0.6421(4)  | 0.8312(3)  | 0.0117(3)  | 3.56(9)         |
| C7   | 0.4041(3)  | 1.1082(3)  | 0.2866(3)  | 2.86(8)         |
| C8   | 0.4072(4)  | 1.1650(3)  | 0.3637(3)  | 3.95(10)        |
| C9   | 0.3689(4)  | 1.1623(3)  | 0.2215(4)  | 4.11(10)        |
| C10  | 0.7794(4)  | 0.9764(3)  | 0.0673(3)  | 3.93(10)        |
| C11  | 0.6323(4)  | 1.1566(3)  | 0.1805(4)  | 4.03(10)        |
| C12  | 0.2153(3)  | 0.7153(2)  | 0.7004(2)  | 2.04(6)         |
| C13  | 0.2392(4)  | 0.6451(3)  | 0.8196(3)  | 2.73(8)         |
| C14  | 0.1543(4)  | 0.7067(3)  | 0.8606(3)  | 3.02(8)         |
| C15  | 0.3707(3)  | 0.5984(3)  | 0.6424(3)  | 2.60(7)         |
| C16  | 0.3734(5)  | 0.4996(3)  | 0.6445(4)  | 4.30(11)        |
| C17  | 0.4680(4)  | 0.6268(4)  | 0.6387(4)  | 4.32(10)        |
| C18  | 0.0591(3)  | 0.8227(3)  | 0.7944(3)  | 2.72(7)         |
| C19  | -0.0468(4) | 0.7946(3)  | 0.8319(3)  | 3.67(9)         |
| C20  | 0.0590(4)  | 0.9050(3)  | 0.8482(3)  | 3.55(9)         |
| C21  | 0.2887(4)  | 0.5801(3)  | 0.8656(4)  | 4.33(11)        |
| C22  | 0.0864(4)  | 0.7298(4)  | 0.9654(3)  | 4.80(12)        |
| C23  | 0.0959(3)  | 0.6253(2)  | 0.2426(3)  | 1.98(6)         |
| C24  | -0.0090(3) | 0.5859(3)  | 0.1812(3)  | 2.72(8)         |
| C25  | 0.0734(4)  | 0.5212(3)  | 0.1541(3)  | 2.74(8)         |
| C26  | -0.0615(3) | 0.7356(3)  | 0.2809(3)  | 2.48(7)         |
| C27  | -0.1707(3) | 0.7254(3)  | 0.3529(3)  | 3.79(9)         |
| C28  | -0.0607(4) | 0.8012(3)  | 0.2081(3)  | 3.33(8)         |
| C29  | 0.2338(3)  | 0.4947(3)  | 0.1885(3)  | 2.76(7)         |
| C30  | 0.2105(4)  | 0.4185(3)  | 0.2535(4)  | 4.16(10)        |
| C31  | 0.3175(4)  | 0.4649(3)  | 0.0878(3)  | 4.31(11)        |
| C32  | -0.1015(4) | 0.5925(3)  | 0.1613(4)  | 3.98(10)        |
| C33  | 0.0947(5)  | 0.4359(3)  | 0.0962(4)  | 4.80(12)        |
| C34  | 0.4703(3)  | 0.8126(2)  | 0.4435(3)  | 2.17(6)         |
| C35  | 0.5196(3)  | 0.7243(3)  | 0.3860(4)  | 3.31(9)         |
| C36  | 0.5497(3)  | 0.8762(3)  | 0.4137(3)  | 2.71(7)         |
| C37  | 0.2948(3)  | 0.9705(2)  | 0.5120(3)  | 2.19(6)         |
| C38  | 0.2839(4)  | 0.9608(3)  | 0.6133(3)  | 3.51(9)         |
| C39  | 0.1916(4)  | 1.0156(3)  | 0.5149(4)  | 3.71(9)         |
| C40  | 0.1606(3)  | 0.5722(3)  | 0.4953(3)  | 2.87(8)         |
| C41  | 0.2744(4)  | 0.5299(3)  | 0.4389(4)  | 3.80(10)        |
| C42  | 0.1135(4)  | 0.5384(3)  | 0.5962(4)  | 4.28(11)        |
| C43  | -0.0042(3) | 0.7366(3)  | 0.5735(3)  | 2.41(7)         |
| C44  | -0.0698(3) | 0.6982(4)  | 0.5339(3)  | 3.79(10)        |
| C45  | -0.0313(4) | 0.8375(3)  | 0.5860(4)  | 4.08(10)        |

|     |           |           |           |          |
|-----|-----------|-----------|-----------|----------|
| C46 | 0.3752(4) | 0.7422(3) | 0.1273(3) | 3.38(9)  |
| C47 | 0.3435(5) | 0.7161(4) | 0.0518(3) | 5.10(13) |
| C48 | 0.4411(4) | 0.6636(3) | 0.1470(4) | 4.30(11) |
| C49 | 0.1833(4) | 0.8874(3) | 0.2065(3) | 3.06(8)  |
| C50 | 0.2527(5) | 0.9541(4) | 0.1500(4) | 5.08(13) |
| C51 | 0.0896(4) | 0.9335(3) | 0.2941(4) | 4.18(10) |

$$B_{eq} = 8/3 \pi^2 (U_{11}(aa^*)^2 + U_{22}(bb^*)^2 + U_{33}(cc^*)^2 + 2U_{12}(aa^*bb^*)\cos \gamma + 2U_{13}(aa^*cc^*)\cos \beta + 2U_{23}(bb^*cc^*)\cos \alpha)$$

**Table 2-3.** Anisotropic displacement parameters

| atom | U <sub>11</sub> | U <sub>22</sub> | U <sub>33</sub> | U <sub>12</sub> | U <sub>13</sub> | U <sub>23</sub> |
|------|-----------------|-----------------|-----------------|-----------------|-----------------|-----------------|
| Pd1  | 0.02255(15)     | 0.02815(16)     | 0.02228(15)     | -0.00810(12)    | -0.00871(12)    | 0.00373(11)     |
| Pd2  | 0.02381(15)     | 0.02657(16)     | 0.02012(15)     | -0.00437(12)    | -0.00955(12)    | 0.00252(11)     |
| Pd3  | 0.02231(15)     | 0.02508(16)     | 0.02494(15)     | -0.00496(12)    | -0.01116(12)    | -0.00119(11)    |
| Pd4  | 0.02209(14)     | 0.02603(15)     | 0.01997(14)     | -0.00775(12)    | -0.00957(11)    | 0.00278(11)     |
| Si1  | 0.0200(5)       | 0.0220(5)       | 0.0248(5)       | -0.0023(4)      | -0.0100(4)      | -0.0017(4)      |
| Si2  | 0.0199(5)       | 0.0261(5)       | 0.0268(5)       | -0.0046(4)      | -0.0096(4)      | 0.0050(4)       |
| Si3  | 0.0290(6)       | 0.0292(6)       | 0.0228(5)       | -0.0068(5)      | -0.0122(4)      | 0.0024(4)       |
| N1   | 0.0245(17)      | 0.0384(19)      | 0.0241(17)      | -0.0104(15)     | -0.0085(14)     | 0.0059(14)      |
| N2   | 0.0294(18)      | 0.0328(19)      | 0.0262(17)      | -0.0119(15)     | -0.0115(14)     | 0.0082(14)      |
| N3   | 0.0326(18)      | 0.0272(17)      | 0.0272(17)      | -0.0010(14)     | -0.0147(15)     | 0.0021(14)      |
| N4   | 0.0347(19)      | 0.0300(18)      | 0.0235(17)      | -0.0053(15)     | -0.0103(14)     | 0.0051(14)      |
| N5   | 0.0285(17)      | 0.0344(19)      | 0.0251(17)      | -0.0091(15)     | -0.0130(14)     | 0.0001(14)      |
| N6   | 0.0323(18)      | 0.0222(16)      | 0.0295(18)      | -0.0042(14)     | -0.0131(15)     | -0.0023(13)     |
| C1   | 0.0263(19)      | 0.032(2)        | 0.0213(19)      | -0.0072(16)     | -0.0099(16)     | 0.0047(15)      |
| C2   | 0.033(2)        | 0.056(3)        | 0.023(2)        | -0.025(2)       | -0.0116(17)     | 0.0093(19)      |
| C3   | 0.035(2)        | 0.046(3)        | 0.027(2)        | -0.019(2)       | -0.0111(18)     | 0.0070(19)      |
| C4   | 0.028(2)        | 0.036(2)        | 0.037(2)        | -0.0046(18)     | -0.0121(18)     | -0.0008(18)     |
| C5   | 0.037(3)        | 0.053(3)        | 0.054(3)        | 0.002(2)        | -0.014(2)       | 0.002(2)        |
| C6   | 0.044(3)        | 0.058(3)        | 0.032(2)        | -0.017(2)       | -0.013(2)       | -0.004(2)       |
| C7   | 0.039(2)        | 0.035(2)        | 0.034(2)        | -0.0129(19)     | -0.0139(19)     | 0.0047(18)      |
| C8   | 0.058(3)        | 0.048(3)        | 0.040(3)        | -0.018(2)       | -0.015(2)       | -0.002(2)       |
| C9   | 0.055(3)        | 0.048(3)        | 0.053(3)        | -0.002(2)       | -0.026(3)       | 0.009(2)        |
| C10  | 0.038(3)        | 0.068(3)        | 0.042(3)        | -0.024(2)       | -0.012(2)       | 0.003(2)        |
| C11  | 0.053(3)        | 0.054(3)        | 0.046(3)        | -0.027(3)       | -0.016(2)       | 0.006(2)        |
| C12  | 0.029(2)        | 0.030(2)        | 0.0150(18)      | -0.0068(17)     | -0.0057(15)     | 0.0029(15)      |
| C13  | 0.045(3)        | 0.039(2)        | 0.025(2)        | -0.011(2)       | -0.0198(19)     | 0.0122(18)      |
| C14  | 0.047(3)        | 0.045(3)        | 0.021(2)        | -0.010(2)       | -0.0131(19)     | 0.0082(18)      |
| C15  | 0.038(2)        | 0.028(2)        | 0.034(2)        | 0.0026(18)      | -0.0193(19)     | -0.0027(17)     |
| C16  | 0.078(4)        | 0.029(2)        | 0.056(3)        | 0.003(2)        | -0.033(3)       | 0.000(2)        |
| C17  | 0.038(3)        | 0.065(3)        | 0.059(3)        | -0.004(2)       | -0.020(2)       | -0.007(3)       |
| C18  | 0.032(2)        | 0.035(2)        | 0.028(2)        | -0.0020(18)     | -0.0079(18)     | -0.0016(17)     |
| C19  | 0.034(2)        | 0.058(3)        | 0.039(3)        | -0.008(2)       | -0.009(2)       | 0.002(2)        |
| C20  | 0.047(3)        | 0.036(3)        | 0.041(3)        | -0.002(2)       | -0.013(2)       | -0.003(2)       |
| C21  | 0.074(4)        | 0.055(3)        | 0.046(3)        | -0.003(3)       | -0.038(3)       | 0.014(2)        |
| C22  | 0.071(4)        | 0.082(4)        | 0.022(2)        | -0.005(3)       | -0.017(2)       | 0.009(2)        |
| C23  | 0.0234(18)      | 0.028(2)        | 0.0229(19)      | -0.0059(16)     | -0.0087(15)     | -0.0022(15)     |
| C24  | 0.040(2)        | 0.041(2)        | 0.032(2)        | -0.021(2)       | -0.0203(19)     | 0.0042(18)      |
| C25  | 0.047(3)        | 0.031(2)        | 0.033(2)        | -0.015(2)       | -0.022(2)       | -0.0029(18)     |
| C26  | 0.028(2)        | 0.037(2)        | 0.028(2)        | -0.0031(18)     | -0.0133(17)     | -0.0001(17)     |
| C27  | 0.029(2)        | 0.066(3)        | 0.043(3)        | -0.002(2)       | -0.014(2)       | 0.004(2)        |
| C28  | 0.045(3)        | 0.045(3)        | 0.042(3)        | -0.004(2)       | -0.026(2)       | 0.001(2)        |
| C29  | 0.034(2)        | 0.028(2)        | 0.037(2)        | -0.0020(18)     | -0.0122(19)     | -0.0046(18)     |
| C30  | 0.055(3)        | 0.044(3)        | 0.062(3)        | -0.004(2)       | -0.030(3)       | 0.010(2)        |
| C31  | 0.047(3)        | 0.049(3)        | 0.051(3)        | 0.002(2)        | -0.009(2)       | -0.014(2)       |
| C32  | 0.047(3)        | 0.063(3)        | 0.057(3)        | -0.021(2)       | -0.034(3)       | 0.003(3)        |
| C33  | 0.095(5)        | 0.036(3)        | 0.067(4)        | -0.012(3)       | -0.049(3)       | -0.006(2)       |
| C34  | 0.0247(19)      | 0.029(2)        | 0.030(2)        | -0.0051(16)     | -0.0126(16)     | 0.0058(16)      |
| C35  | 0.028(2)        | 0.029(2)        | 0.065(3)        | 0.0032(18)      | -0.019(2)       | -0.000(2)       |
| C36  | 0.0199(19)      | 0.041(2)        | 0.044(2)        | -0.0045(17)     | -0.0157(18)     | -0.0014(19)     |

|     |            |          |          |             |             |             |
|-----|------------|----------|----------|-------------|-------------|-------------|
| C37 | 0.027(2)   | 0.025(2) | 0.028(2) | -0.0061(16) | -0.0094(16) | -0.0021(16) |
| C38 | 0.058(3)   | 0.039(3) | 0.030(2) | -0.013(2)   | -0.013(2)   | -0.0060(19) |
| C39 | 0.035(2)   | 0.037(3) | 0.060(3) | 0.009(2)    | -0.018(2)   | -0.018(2)   |
| C40 | 0.042(2)   | 0.025(2) | 0.053(3) | -0.0080(19) | -0.030(2)   | 0.0039(19)  |
| C41 | 0.051(3)   | 0.029(2) | 0.065(3) | 0.010(2)    | -0.032(3)   | -0.005(2)   |
| C42 | 0.063(3)   | 0.037(3) | 0.063(3) | -0.016(2)   | -0.027(3)   | 0.023(2)    |
| C43 | 0.0233(19) | 0.039(2) | 0.026(2) | -0.0040(17) | -0.0085(16) | 0.0064(17)  |
| C44 | 0.026(2)   | 0.083(4) | 0.037(3) | -0.019(2)   | -0.013(2)   | 0.012(2)    |
| C45 | 0.033(3)   | 0.052(3) | 0.056(3) | 0.007(2)    | -0.011(2)   | 0.005(2)    |
| C46 | 0.042(3)   | 0.055(3) | 0.025(2) | -0.012(2)   | -0.0082(19) | -0.004(2)   |
| C47 | 0.075(4)   | 0.092(4) | 0.028(3) | -0.033(3)   | -0.018(3)   | -0.010(3)   |
| C48 | 0.031(2)   | 0.063(3) | 0.048(3) | -0.007(2)   | 0.001(2)    | -0.023(2)   |
| C49 | 0.046(3)   | 0.040(2) | 0.042(3) | -0.016(2)   | -0.028(2)   | 0.018(2)    |
| C50 | 0.082(4)   | 0.060(3) | 0.081(4) | -0.034(3)   | -0.058(4)   | 0.041(3)    |
| C51 | 0.061(3)   | 0.037(3) | 0.071(4) | 0.007(2)    | -0.043(3)   | 0.002(2)    |

The general temperature factor expression:  $\exp(-2\pi^2(a^2U_{11}h^2 + b^2U_{22}k^2 + c^2U_{33}l^2 + 2a*b*U_{12}hk + 2a*c*U_{13}hl + 2b*c*U_{23}kl))$

**Table 2-4.** Bond lengths (Å)

| atom | atom | distance   | atom | atom | distance   |
|------|------|------------|------|------|------------|
| Pd1  | Pd4  | 2.7029(6)  | Pd1  | Si1  | 2.3668(13) |
| Pd1  | Si3  | 2.6359(14) | Pd1  | C1   | 2.073(4)   |
| Pd2  | Pd4  | 2.6991(8)  | Pd2  | Si1  | 2.6518(12) |
| Pd2  | Si2  | 2.3769(15) | Pd2  | C12  | 2.073(4)   |
| Pd3  | Pd4  | 2.7030(7)  | Pd3  | Si2  | 2.6659(14) |
| Pd3  | Si3  | 2.3693(12) | Pd3  | C23  | 2.073(5)   |
| Pd4  | Si1  | 2.2638(14) | Pd4  | Si2  | 2.2558(11) |
| Pd4  | Si3  | 2.2603(13) | Si1  | C34  | 1.915(5)   |
| Si1  | C37  | 1.915(4)   | Si2  | C40  | 1.908(4)   |
| Si2  | C43  | 1.924(4)   | Si3  | C46  | 1.919(4)   |
| Si3  | C49  | 1.922(5)   | N1   | C1   | 1.360(4)   |
| N1   | C2   | 1.409(6)   | N1   | C4   | 1.464(5)   |
| N2   | C1   | 1.358(5)   | N2   | C3   | 1.400(5)   |
| N2   | C7   | 1.470(5)   | N3   | C12  | 1.375(5)   |
| N3   | C13  | 1.402(5)   | N3   | C15  | 1.475(4)   |
| N4   | C12  | 1.348(4)   | N4   | C14  | 1.394(6)   |
| N4   | C18  | 1.471(5)   | N5   | C23  | 1.363(6)   |
| N5   | C24  | 1.396(6)   | N5   | C26  | 1.484(5)   |
| N6   | C23  | 1.363(5)   | N6   | C25  | 1.393(7)   |
| N6   | C29  | 1.475(6)   | C2   | C3   | 1.345(6)   |
| C2   | C10  | 1.494(6)   | C3   | C11  | 1.488(7)   |
| C4   | C5   | 1.529(7)   | C4   | C6   | 1.521(7)   |
| C7   | C8   | 1.514(8)   | C7   | C9   | 1.519(8)   |
| C13  | C14  | 1.333(6)   | C13  | C21  | 1.504(8)   |
| C14  | C22  | 1.503(5)   | C15  | C16  | 1.511(6)   |
| C15  | C17  | 1.514(8)   | C18  | C19  | 1.512(7)   |
| C18  | C20  | 1.522(7)   | C24  | C25  | 1.339(6)   |
| C24  | C32  | 1.495(8)   | C25  | C33  | 1.509(7)   |
| C26  | C27  | 1.515(5)   | C26  | C28  | 1.512(6)   |
| C29  | C30  | 1.521(6)   | C29  | C31  | 1.521(5)   |
| C34  | C35  | 1.522(5)   | C34  | C36  | 1.534(6)   |
| C37  | C38  | 1.530(7)   | C37  | C39  | 1.533(7)   |
| C40  | C41  | 1.522(6)   | C40  | C42  | 1.539(7)   |
| C43  | C44  | 1.528(8)   | C43  | C45  | 1.529(6)   |
| C46  | C47  | 1.522(9)   | C46  | C48  | 1.539(7)   |
| C49  | C50  | 1.534(7)   | C49  | C51  | 1.516(6)   |

**Table 2-5.** Bond angles (°)

| atom | atom | atom | angle | atom | atom | atom | angle |
|------|------|------|-------|------|------|------|-------|
|------|------|------|-------|------|------|------|-------|

|     |     |     |            |     |     |     |             |
|-----|-----|-----|------------|-----|-----|-----|-------------|
| Pd4 | Pd1 | Si1 | 52.53(3)   | Pd4 | Pd1 | Si3 | 50.08(3)    |
| Pd4 | Pd1 | C1  | 163.61(13) | Si1 | Pd1 | Si3 | 102.60(4)   |
| Si1 | Pd1 | C1  | 112.24(13) | Si3 | Pd1 | C1  | 144.65(13)  |
| Pd4 | Pd2 | Si1 | 50.05(3)   | Pd4 | Pd2 | Si2 | 52.30(3)    |
| Pd4 | Pd2 | C12 | 170.18(12) | Si1 | Pd2 | Si2 | 102.21(4)   |
| Si1 | Pd2 | C12 | 139.60(13) | Si2 | Pd2 | C12 | 118.18(13)  |
| Pd4 | Pd3 | Si2 | 49.68(3)   | Pd4 | Pd3 | Si3 | 52.42(4)    |
| Pd4 | Pd3 | C23 | 169.15(9)  | Si2 | Pd3 | Si3 | 101.99(4)   |
| Si2 | Pd3 | C23 | 140.98(10) | Si3 | Pd3 | C23 | 117.02(10)  |
| Pd1 | Pd4 | Pd2 | 119.78(2)  | Pd1 | Pd4 | Pd3 | 119.41(2)   |
| Pd1 | Pd4 | Si1 | 56.08(3)   | Pd1 | Pd4 | Si2 | 176.26(4)   |
| Pd1 | Pd4 | Si3 | 63.42(3)   | Pd2 | Pd4 | Pd3 | 120.198(19) |
| Pd2 | Pd4 | Si1 | 63.89(3)   | Pd2 | Pd4 | Si2 | 56.48(4)    |
| Pd2 | Pd4 | Si3 | 175.17(3)  | Pd3 | Pd4 | Si1 | 174.52(2)   |
| Pd3 | Pd4 | Si2 | 64.30(4)   | Pd3 | Pd4 | Si3 | 56.18(3)    |
| Si1 | Pd4 | Si2 | 120.18(5)  | Si1 | Pd4 | Si3 | 119.50(4)   |
| Si2 | Pd4 | Si3 | 120.31(5)  | Pd1 | Si1 | Pd2 | 137.15(6)   |
| Pd1 | Si1 | Pd4 | 71.38(4)   | Pd1 | Si1 | C34 | 109.40(12)  |
| Pd1 | Si1 | C37 | 108.70(13) | Pd2 | Si1 | Pd4 | 66.06(3)    |
| Pd2 | Si1 | C34 | 91.90(12)  | Pd2 | Si1 | C37 | 100.38(11)  |
| Pd4 | Si1 | C34 | 125.85(13) | Pd4 | Si1 | C37 | 126.47(15)  |
| C34 | Si1 | C37 | 105.1(2)   | Pd2 | Si2 | Pd3 | 136.37(4)   |
| Pd2 | Si2 | Pd4 | 71.21(4)   | Pd2 | Si2 | C40 | 110.29(19)  |
| Pd2 | Si2 | C43 | 109.06(16) | Pd3 | Si2 | Pd4 | 66.01(3)    |
| Pd3 | Si2 | C40 | 90.46(17)  | Pd3 | Si2 | C43 | 101.49(16)  |
| Pd4 | Si2 | C40 | 128.66(12) | Pd4 | Si2 | C43 | 123.74(13)  |
| C40 | Si2 | C43 | 104.74(18) | Pd1 | Si3 | Pd3 | 137.60(5)   |
| Pd1 | Si3 | Pd4 | 66.50(4)   | Pd1 | Si3 | C46 | 91.15(18)   |
| Pd1 | Si3 | C49 | 99.23(17)  | Pd3 | Si3 | Pd4 | 71.40(3)    |
| Pd3 | Si3 | C46 | 110.14(16) | Pd3 | Si3 | C49 | 109.01(16)  |
| Pd4 | Si3 | C46 | 126.16(18) | Pd4 | Si3 | C49 | 125.36(14)  |
| C46 | Si3 | C49 | 105.5(2)   | C1  | N1  | C2  | 110.9(3)    |
| C1  | N1  | C4  | 120.2(3)   | C2  | N1  | C4  | 128.5(3)    |
| C1  | N2  | C3  | 111.2(3)   | C1  | N2  | C7  | 120.1(3)    |
| C3  | N2  | C7  | 128.5(3)   | C12 | N3  | C13 | 110.2(3)    |
| C12 | N3  | C15 | 120.1(3)   | C13 | N3  | C15 | 129.5(4)    |
| C12 | N4  | C14 | 111.7(3)   | C12 | N4  | C18 | 120.1(4)    |
| C14 | N4  | C18 | 128.2(3)   | C23 | N5  | C24 | 111.3(3)    |
| C23 | N5  | C26 | 119.7(4)   | C24 | N5  | C26 | 129.0(4)    |
| C23 | N6  | C25 | 111.1(3)   | C23 | N6  | C29 | 120.0(4)    |
| C25 | N6  | C29 | 128.7(3)   | Pd1 | C1  | N1  | 125.1(3)    |
| Pd1 | C1  | N2  | 130.2(2)   | N1  | C1  | N2  | 104.6(3)    |
| N1  | C2  | C3  | 106.5(3)   | N1  | C2  | C10 | 124.0(4)    |
| C3  | C2  | C10 | 129.5(5)   | N2  | C3  | C2  | 106.8(4)    |
| N2  | C3  | C11 | 125.4(3)   | C2  | C3  | C11 | 127.7(4)    |
| N1  | C4  | C5  | 113.5(4)   | N1  | C4  | C6  | 111.7(4)    |
| C5  | C4  | C6  | 112.9(3)   | N2  | C7  | C8  | 113.9(4)    |
| N2  | C7  | C9  | 110.4(3)   | C8  | C7  | C9  | 112.6(4)    |
| Pd2 | C12 | N3  | 127.2(2)   | Pd2 | C12 | N4  | 128.7(3)    |
| N3  | C12 | N4  | 104.2(3)   | N3  | C13 | C14 | 107.1(4)    |
| N3  | C13 | C21 | 123.8(3)   | C14 | C13 | C21 | 129.1(4)    |
| N4  | C14 | C13 | 106.8(3)   | N4  | C14 | C22 | 125.3(4)    |
| C13 | C14 | C22 | 127.9(5)   | N3  | C15 | C16 | 113.1(3)    |
| N3  | C15 | C17 | 110.8(4)   | C16 | C15 | C17 | 113.4(4)    |
| N4  | C18 | C19 | 112.4(4)   | N4  | C18 | C20 | 112.3(4)    |
| C19 | C18 | C20 | 113.3(3)   | Pd3 | C23 | N5  | 128.1(2)    |
| Pd3 | C23 | N6  | 127.9(3)   | N5  | C23 | N6  | 103.9(4)    |
| N5  | C24 | C25 | 106.6(5)   | N5  | C24 | C32 | 124.3(4)    |
| C25 | C24 | C32 | 129.1(5)   | N6  | C25 | C24 | 107.1(4)    |
| N6  | C25 | C33 | 124.9(4)   | C24 | C25 | C33 | 128.0(6)    |

|     |     |     |          |     |     |     |          |
|-----|-----|-----|----------|-----|-----|-----|----------|
| N5  | C26 | C27 | 112.9(3) | N5  | C26 | C28 | 111.9(3) |
| C27 | C26 | C28 | 112.8(4) | N6  | C29 | C30 | 111.2(4) |
| N6  | C29 | C31 | 113.7(4) | C30 | C29 | C31 | 112.3(3) |
| Si1 | C34 | C35 | 111.3(4) | Si1 | C34 | C36 | 113.6(3) |
| C35 | C34 | C36 | 110.5(3) | Si1 | C37 | C38 | 112.7(3) |
| Si1 | C37 | C39 | 110.9(3) | C38 | C37 | C39 | 110.5(3) |
| Si2 | C40 | C41 | 112.0(3) | Si2 | C40 | C42 | 113.3(3) |
| C41 | C40 | C42 | 110.8(4) | Si2 | C43 | C44 | 111.6(3) |
| Si2 | C43 | C45 | 111.5(3) | C44 | C43 | C45 | 110.7(4) |
| Si3 | C46 | C47 | 113.9(4) | Si3 | C46 | C48 | 110.9(3) |
| C47 | C46 | C48 | 111.2(4) | Si3 | C49 | C50 | 110.9(4) |
| Si3 | C49 | C51 | 109.9(4) | C50 | C49 | C51 | 110.4(4) |

**Table 2-6.** Torsion Angles(°)

(Those having bond angles > 160 or < 20 degrees are excluded.)

| atom1 | atom2 | atom3 | atom4 | angle       | atom1 | atom2 | atom3 | atom4 | angle       |
|-------|-------|-------|-------|-------------|-------|-------|-------|-------|-------------|
| Pd4   | Pd1   | Si1   | Pd2   | 6.90(4)     | Pd4   | Pd1   | Si1   | Pd4   | -0.0        |
| Pd4   | Pd1   | Si1   | C34   | 122.45(6)   | Pd4   | Pd1   | Si1   | C37   | -123.24(6)  |
| Si1   | Pd1   | Pd4   | Pd2   | -5.31(3)    | Si1   | Pd1   | Pd4   | Pd3   | -176.33(3)  |
| Si1   | Pd1   | Pd4   | Si1   | -0.00(3)    | Si1   | Pd1   | Pd4   | Si3   | 178.79(3)   |
| Pd4   | Pd1   | Si3   | Pd3   | -7.20(4)    | Pd4   | Pd1   | Si3   | Pd4   | -0.0        |
| Pd4   | Pd1   | Si3   | C46   | -129.40(5)  | Pd4   | Pd1   | Si3   | C49   | 124.66(4)   |
| Si3   | Pd1   | Pd4   | Pd2   | 175.90(3)   | Si3   | Pd1   | Pd4   | Pd3   | 4.88(3)     |
| Si3   | Pd1   | Pd4   | Si1   | -178.79(3)  | Si3   | Pd1   | Pd4   | Si3   | -0.00(3)    |
| Si1   | Pd1   | Si3   | Pd3   | -8.19(7)    | Si1   | Pd1   | Si3   | Pd4   | -0.98(3)    |
| Si1   | Pd1   | Si3   | C46   | -130.39(4)  | Si1   | Pd1   | Si3   | C49   | 123.68(4)   |
| Si3   | Pd1   | Si1   | Pd2   | 7.85(7)     | Si3   | Pd1   | Si1   | Pd4   | 0.95(3)     |
| Si3   | Pd1   | Si1   | C34   | 123.40(5)   | Si3   | Pd1   | Si1   | C37   | -122.29(5)  |
| Si1   | Pd1   | C1    | N1    | 101.5(3)    | Si1   | Pd1   | C1    | N2    | -73.6(4)    |
| C1    | Pd1   | Si1   | Pd2   | -166.07(11) | C1    | Pd1   | Si1   | Pd4   | -172.97(10) |
| C1    | Pd1   | Si1   | C34   | -50.52(12)  | C1    | Pd1   | Si1   | C37   | 63.79(12)   |
| Si3   | Pd1   | C1    | N1    | -68.2(4)    | Si3   | Pd1   | C1    | N2    | 116.7(3)    |
| C1    | Pd1   | Si3   | Pd3   | 162.05(18)  | C1    | Pd1   | Si3   | Pd4   | 169.25(18)  |
| C1    | Pd1   | Si3   | C46   | 39.85(19)   | C1    | Pd1   | Si3   | C49   | -66.08(18)  |
| Pd4   | Pd2   | Si1   | Pd1   | -7.16(4)    | Pd4   | Pd2   | Si1   | Pd4   | 0.0         |
| Pd4   | Pd2   | Si1   | C34   | -128.78(4)  | Pd4   | Pd2   | Si1   | C37   | 125.44(6)   |
| Si1   | Pd2   | Pd4   | Pd1   | 4.90(3)     | Si1   | Pd2   | Pd4   | Pd3   | 175.85(3)   |
| Si1   | Pd2   | Pd4   | Si1   | 0.00(3)     | Si1   | Pd2   | Pd4   | Si2   | -174.96(3)  |
| Pd4   | Pd2   | Si2   | Pd3   | 11.69(4)    | Pd4   | Pd2   | Si2   | Pd4   | -0.0        |
| Pd4   | Pd2   | Si2   | C40   | 125.29(5)   | Pd4   | Pd2   | Si2   | C43   | -120.21(6)  |
| Si2   | Pd2   | Pd4   | Pd1   | 179.87(3)   | Si2   | Pd2   | Pd4   | Pd3   | -9.18(3)    |
| Si2   | Pd2   | Pd4   | Si1   | 174.96(3)   | Si2   | Pd2   | Pd4   | Si2   | -0.00(3)    |
| Si1   | Pd2   | Si2   | Pd3   | 15.64(7)    | Si1   | Pd2   | Si2   | Pd4   | 3.95(3)     |
| Si1   | Pd2   | Si2   | C40   | 129.24(4)   | Si1   | Pd2   | Si2   | C43   | -116.26(5)  |
| Si2   | Pd2   | Si1   | Pd1   | -11.23(7)   | Si2   | Pd2   | Si1   | Pd4   | -4.07(3)    |
| Si2   | Pd2   | Si1   | C34   | -132.86(4)  | Si2   | Pd2   | Si1   | C37   | 121.36(5)   |
| Si1   | Pd2   | C12   | N3    | -84.7(3)    | Si1   | Pd2   | C12   | N4    | 92.9(4)     |
| C12   | Pd2   | Si1   | Pd1   | 170.19(14)  | C12   | Pd2   | Si1   | Pd4   | 177.35(14)  |
| C12   | Pd2   | Si1   | C34   | 48.56(15)   | C12   | Pd2   | Si1   | C37   | -57.21(15)  |
| Si2   | Pd2   | C12   | N3    | 96.8(3)     | Si2   | Pd2   | C12   | N4    | -85.5(3)    |
| C12   | Pd2   | Si2   | Pd3   | -165.41(11) | C12   | Pd2   | Si2   | Pd4   | -177.10(10) |
| C12   | Pd2   | Si2   | C40   | -51.81(11)  | C12   | Pd2   | Si2   | C43   | 62.69(12)   |
| Pd4   | Pd3   | Si2   | Pd2   | -12.12(4)   | Pd4   | Pd3   | Si2   | Pd4   | 0.000(12)   |
| Pd4   | Pd3   | Si2   | C40   | -132.85(5)  | Pd4   | Pd3   | Si2   | C43   | 122.00(5)   |
| Si2   | Pd3   | Pd4   | Pd1   | 179.47(3)   | Si2   | Pd3   | Pd4   | Pd2   | 8.49(3)     |
| Si2   | Pd3   | Pd4   | Si2   | 0.00(3)     | Si2   | Pd3   | Pd4   | Si3   | -175.27(3)  |
| Pd4   | Pd3   | Si3   | Pd1   | 6.97(4)     | Pd4   | Pd3   | Si3   | Pd4   | 0.000(14)   |
| Pd4   | Pd3   | Si3   | C46   | 122.66(7)   | Pd4   | Pd3   | Si3   | C49   | -122.00(5)  |
| Si3   | Pd3   | Pd4   | Pd1   | -5.25(3)    | Si3   | Pd3   | Pd4   | Pd2   | -176.24(3)  |
| Si3   | Pd3   | Pd4   | Si2   | 175.27(3)   | Si3   | Pd3   | Pd4   | Si3   | 0.00(3)     |

|     |     |     |     |             |     |     |     |     |             |
|-----|-----|-----|-----|-------------|-----|-----|-----|-----|-------------|
| Si2 | Pd3 | Si3 | Pd1 | 10.65(6)    | Si2 | Pd3 | Si3 | Pd4 | 3.68(3)     |
| Si2 | Pd3 | Si3 | C46 | 126.34(6)   | Si2 | Pd3 | Si3 | C49 | -118.32(5)  |
| Si3 | Pd3 | Si2 | Pd2 | -15.95(7)   | Si3 | Pd3 | Si2 | Pd4 | -3.83(3)    |
| Si3 | Pd3 | Si2 | C40 | -136.68(4)  | Si3 | Pd3 | Si2 | C43 | 118.17(5)   |
| Si2 | Pd3 | C23 | N5  | 88.5(3)     | Si2 | Pd3 | C23 | N6  | -86.4(3)    |
| C23 | Pd3 | Si2 | Pd2 | 165.05(15)  | C23 | Pd3 | Si2 | Pd4 | 177.17(15)  |
| C23 | Pd3 | Si2 | C40 | 44.32(16)   | C23 | Pd3 | Si2 | C43 | -60.83(16)  |
| Si3 | Pd3 | C23 | N5  | -90.4(3)    | Si3 | Pd3 | C23 | N6  | 94.7(3)     |
| C23 | Pd3 | Si3 | Pd1 | -170.05(11) | C23 | Pd3 | Si3 | Pd4 | -177.02(11) |
| C23 | Pd3 | Si3 | C46 | -54.36(12)  | C23 | Pd3 | Si3 | C49 | 60.98(12)   |
| Pd1 | Pd4 | Si1 | Pd1 | -0.0        | Pd1 | Pd4 | Si1 | Pd2 | -174.87(3)  |
| Pd1 | Pd4 | Si1 | C34 | -100.89(6)  | Pd1 | Pd4 | Si1 | C37 | 99.89(7)    |
| Pd1 | Pd4 | Si3 | Pd1 | 0.0         | Pd1 | Pd4 | Si3 | Pd3 | 174.88(3)   |
| Pd1 | Pd4 | Si3 | C46 | 73.11(7)    | Pd1 | Pd4 | Si3 | C49 | -84.59(7)   |
| Pd2 | Pd4 | Si1 | Pd1 | 174.87(3)   | Pd2 | Pd4 | Si1 | Pd2 | 0.000(13)   |
| Pd2 | Pd4 | Si1 | C34 | 73.98(6)    | Pd2 | Pd4 | Si1 | C37 | -85.24(6)   |
| Pd2 | Pd4 | Si2 | Pd2 | -0.000(11)  | Pd2 | Pd4 | Si2 | Pd3 | -171.20(3)  |
| Pd2 | Pd4 | Si2 | C40 | -101.35(9)  | Pd2 | Pd4 | Si2 | C43 | 100.81(7)   |
| Pd3 | Pd4 | Si2 | Pd2 | 171.20(3)   | Pd3 | Pd4 | Si2 | Pd3 | -0.000(12)  |
| Pd3 | Pd4 | Si2 | C40 | 69.84(8)    | Pd3 | Pd4 | Si2 | C43 | -87.99(7)   |
| Pd3 | Pd4 | Si3 | Pd1 | -174.88(3)  | Pd3 | Pd4 | Si3 | Pd3 | -0.0        |
| Pd3 | Pd4 | Si3 | C46 | -101.78(7)  | Pd3 | Pd4 | Si3 | C49 | 100.52(7)   |
| Si1 | Pd4 | Si2 | Pd2 | -5.23(4)    | Si1 | Pd4 | Si2 | Pd3 | -176.43(3)  |
| Si1 | Pd4 | Si2 | C40 | -106.58(8)  | Si1 | Pd4 | Si2 | C43 | 95.58(8)    |
| Si2 | Pd4 | Si1 | Pd1 | 179.73(3)   | Si2 | Pd4 | Si1 | Pd2 | 4.86(4)     |
| Si2 | Pd4 | Si1 | C34 | 78.84(6)    | Si2 | Pd4 | Si1 | C37 | -80.39(7)   |
| Si1 | Pd4 | Si3 | Pd1 | 1.15(4)     | Si1 | Pd4 | Si3 | Pd3 | 176.04(3)   |
| Si1 | Pd4 | Si3 | C46 | 74.26(8)    | Si1 | Pd4 | Si3 | C49 | -83.44(8)   |
| Si3 | Pd4 | Si1 | Pd1 | -1.24(4)    | Si3 | Pd4 | Si1 | Pd2 | -176.11(3)  |
| Si3 | Pd4 | Si1 | C34 | -102.13(6)  | Si3 | Pd4 | Si1 | C37 | 98.64(6)    |
| Si2 | Pd4 | Si3 | Pd1 | -179.82(3)  | Si2 | Pd4 | Si3 | Pd3 | -4.94(4)    |
| Si2 | Pd4 | Si3 | C46 | -106.71(7)  | Si2 | Pd4 | Si3 | C49 | 95.59(7)    |
| Si3 | Pd4 | Si2 | Pd2 | 175.75(3)   | Si3 | Pd4 | Si2 | Pd3 | 4.55(4)     |
| Si3 | Pd4 | Si2 | C40 | 74.39(9)    | Si3 | Pd4 | Si2 | C43 | -83.44(8)   |
| Pd1 | Si1 | C34 | C35 | -62.8(2)    | Pd1 | Si1 | C34 | C36 | 62.7(2)     |
| Pd1 | Si1 | C37 | C38 | -171.55(18) | Pd1 | Si1 | C37 | C39 | 64.0(2)     |
| Pd2 | Si1 | C34 | C35 | 79.30(19)   | Pd2 | Si1 | C34 | C36 | -155.2(2)   |
| Pd2 | Si1 | C37 | C38 | 40.4(3)     | Pd2 | Si1 | C37 | C39 | -84.1(2)    |
| Pd4 | Si1 | C34 | C35 | 17.8(3)     | Pd4 | Si1 | C34 | C36 | 143.29(16)  |
| Pd4 | Si1 | C37 | C38 | 108.2(3)    | Pd4 | Si1 | C37 | C39 | -16.3(3)    |
| C34 | Si1 | C37 | C38 | -54.5(3)    | C34 | Si1 | C37 | C39 | -178.94(19) |
| C37 | Si1 | C34 | C35 | -179.4(2)   | C37 | Si1 | C34 | C36 | -53.9(3)    |
| Pd2 | Si2 | C40 | C41 | -60.7(3)    | Pd2 | Si2 | C40 | C42 | 65.5(3)     |
| Pd2 | Si2 | C43 | C44 | -177.13(18) | Pd2 | Si2 | C43 | C45 | 58.5(3)     |
| Pd3 | Si2 | C40 | C41 | 80.0(3)     | Pd3 | Si2 | C40 | C42 | -153.7(3)   |
| Pd3 | Si2 | C43 | C44 | 34.5(2)     | Pd3 | Si2 | C43 | C45 | -89.9(3)    |
| Pd4 | Si2 | C40 | C41 | 21.0(4)     | Pd4 | Si2 | C40 | C42 | 147.25(18)  |
| Pd4 | Si2 | C43 | C44 | 103.2(2)    | Pd4 | Si2 | C43 | C45 | -21.2(4)    |
| C40 | Si2 | C43 | C44 | -59.1(3)    | C40 | Si2 | C43 | C45 | 176.6(3)    |
| C43 | Si2 | C40 | C41 | -177.9(3)   | C43 | Si2 | C40 | C42 | -51.7(4)    |
| Pd1 | Si3 | C46 | C47 | -150.9(3)   | Pd1 | Si3 | C46 | C48 | 82.7(3)     |
| Pd1 | Si3 | C49 | C50 | 35.8(3)     | Pd1 | Si3 | C49 | C51 | -86.5(3)    |
| Pd3 | Si3 | C46 | C47 | 66.5(3)     | Pd3 | Si3 | C46 | C48 | -59.9(3)    |
| Pd3 | Si3 | C49 | C50 | -176.3(2)   | Pd3 | Si3 | C49 | C51 | 61.5(3)     |
| Pd4 | Si3 | C46 | C47 | 147.70(19)  | Pd4 | Si3 | C46 | C48 | 21.3(4)     |
| Pd4 | Si3 | C49 | C50 | 103.5(2)    | Pd4 | Si3 | C49 | C51 | -18.8(4)    |
| C46 | Si3 | C49 | C50 | -58.0(3)    | C46 | Si3 | C49 | C51 | 179.7(3)    |
| C49 | Si3 | C46 | C47 | -51.0(3)    | C49 | Si3 | C46 | C48 | -177.4(3)   |
| C1  | N1  | C2  | C3  | 0.4(5)      | C1  | N1  | C2  | C10 | 177.6(4)    |
| C2  | N1  | C1  | Pd1 | -176.1(3)   | C2  | N1  | C1  | N2  | 0.0(5)      |

|     |     |     |     |           |     |     |     |     |           |
|-----|-----|-----|-----|-----------|-----|-----|-----|-----|-----------|
| C1  | N1  | C4  | C5  | -128.8(4) | C1  | N1  | C4  | C6  | 102.1(4)  |
| C4  | N1  | C1  | Pd1 | 10.5(6)   | C4  | N1  | C1  | N2  | -173.3(4) |
| C2  | N1  | C4  | C5  | 59.1(6)   | C2  | N1  | C4  | C6  | -69.9(6)  |
| C4  | N1  | C2  | C3  | 173.1(4)  | C4  | N1  | C2  | C10 | -9.8(7)   |
| C1  | N2  | C3  | C2  | 0.7(5)    | C1  | N2  | C3  | C11 | -177.7(4) |
| C3  | N2  | C1  | Pd1 | 175.4(4)  | C3  | N2  | C1  | N1  | -0.4(5)   |
| C1  | N2  | C7  | C8  | 130.4(4)  | C1  | N2  | C7  | C9  | -101.7(4) |
| C7  | N2  | C1  | Pd1 | -9.8(7)   | C7  | N2  | C1  | N1  | 174.4(4)  |
| C3  | N2  | C7  | C8  | -55.8(6)  | C3  | N2  | C7  | C9  | 72.1(6)   |
| C7  | N2  | C3  | C2  | -173.6(4) | C7  | N2  | C3  | C11 | 8.0(8)    |
| C12 | N3  | C13 | C14 | 1.9(5)    | C12 | N3  | C13 | C21 | -179.5(4) |
| C13 | N3  | C12 | Pd2 | 176.9(3)  | C13 | N3  | C12 | N4  | -1.3(5)   |
| C12 | N3  | C15 | C16 | -126.7(4) | C12 | N3  | C15 | C17 | 104.8(4)  |
| C15 | N3  | C12 | Pd2 | 1.8(6)    | C15 | N3  | C12 | N4  | -176.3(3) |
| C13 | N3  | C15 | C16 | 59.4(6)   | C13 | N3  | C15 | C17 | -69.2(5)  |
| C15 | N3  | C13 | C14 | 176.4(4)  | C15 | N3  | C13 | C21 | -5.1(7)   |
| C12 | N4  | C14 | C13 | 1.0(5)    | C12 | N4  | C14 | C22 | 178.8(4)  |
| C14 | N4  | C12 | Pd2 | -177.9(3) | C14 | N4  | C12 | N3  | 0.2(5)    |
| C12 | N4  | C18 | C19 | 110.6(4)  | C12 | N4  | C18 | C20 | -120.2(4) |
| C18 | N4  | C12 | Pd2 | 3.0(6)    | C18 | N4  | C12 | N3  | -178.9(3) |
| C14 | N4  | C18 | C19 | -68.3(6)  | C14 | N4  | C18 | C20 | 60.9(5)   |
| C18 | N4  | C14 | C13 | 180.0(4)  | C18 | N4  | C14 | C22 | -2.2(8)   |
| C23 | N5  | C24 | C25 | -0.6(4)   | C23 | N5  | C24 | C32 | 178.9(3)  |
| C24 | N5  | C23 | Pd3 | -175.2(3) | C24 | N5  | C23 | N6  | 0.6(4)    |
| C23 | N5  | C26 | C27 | -121.2(4) | C23 | N5  | C26 | C28 | 110.3(4)  |
| C26 | N5  | C23 | Pd3 | 5.0(5)    | C26 | N5  | C23 | N6  | -179.1(3) |
| C24 | N5  | C26 | C27 | 59.2(5)   | C24 | N5  | C26 | C28 | -69.4(5)  |
| C26 | N5  | C24 | C25 | 179.0(3)  | C26 | N5  | C24 | C32 | -1.4(6)   |
| C23 | N6  | C25 | C24 | -0.1(4)   | C23 | N6  | C25 | C33 | -178.4(3) |
| C25 | N6  | C23 | Pd3 | 175.5(3)  | C25 | N6  | C23 | N5  | -0.3(4)   |
| C23 | N6  | C29 | C30 | 103.3(4)  | C23 | N6  | C29 | C31 | -128.7(3) |
| C29 | N6  | C23 | Pd3 | -0.3(5)   | C29 | N6  | C23 | N5  | -176.2(3) |
| C25 | N6  | C29 | C30 | -71.7(5)  | C25 | N6  | C29 | C31 | 56.2(5)   |
| C29 | N6  | C25 | C24 | 175.4(3)  | C29 | N6  | C25 | C33 | -3.0(6)   |
| N1  | C2  | C3  | N2  | -0.6(5)   | N1  | C2  | C3  | C11 | 177.7(4)  |
| C10 | C2  | C3  | N2  | -177.6(5) | C10 | C2  | C3  | C11 | 0.8(9)    |
| N3  | C13 | C14 | N4  | -1.8(5)   | N3  | C13 | C14 | C22 | -179.5(4) |
| C21 | C13 | C14 | N4  | 179.8(5)  | C21 | C13 | C14 | C22 | 2.1(9)    |
| N5  | C24 | C25 | N6  | 0.4(4)    | N5  | C24 | C25 | C33 | 178.7(3)  |
| C32 | C24 | C25 | N6  | -179.1(4) | C32 | C24 | C25 | C33 | -0.8(7)   |

**Table 2-7.** Least Squares Planes

----- Plane number 1 -----

| Atoms Defining Plane | Distance | esd    |
|----------------------|----------|--------|
| Pd1 [ 1; 0; 0; 0]    | -0.0310  | 0.0004 |
| Pd2 [ 1; 0; 0; 0]    | -0.0390  | 0.0004 |
| Pd4 [ 1; 0; 0; 0]    | 0.0869   | 0.0003 |
| Pd3 [ 1; 0; 0; 0]    | -0.0382  | 0.0004 |
| Si1 [ 1; 0; 0; 0]    | 0.0576   | 0.0012 |
| Si2 [ 1; 0; 0; 0]    | 0.1778   | 0.0012 |
| Si3 [ 1; 0; 0; 0]    | 0.0575   | 0.0012 |

Least-squares plane

$$-8.38405x + 9.77603y + 0.31631z = 5.60783$$

$$(0.00109) \quad (0.00109) \quad (0.00144) \quad (0.00130)$$

Mean deviation from plane is 0.0697 angstrom

Weight scheme: Sigma Weights

Chi-squared: 78571.687

----- Plane number 2 -----

| Atoms Defining Plane | Distance | esd    |
|----------------------|----------|--------|
| N1 [ 1; 0; 0; 0]     | 0.0006   | 0.0045 |
| N2 [ 1; 0; 0; 0]     | -0.0022  | 0.0047 |
| C1 [ 1; 0; 0; 0]     | 0.0013   | 0.0052 |
| C2 [ 1; 0; 0; 0]     | -0.0031  | 0.0058 |
| C3 [ 1; 0; 0; 0]     | 0.0044   | 0.0059 |

Least-squares plane

$$8.35265x - 2.64123y + 15.08449z = 4.89848$$

(0.02731) (0.03331) (0.00888) (0.04217)

Mean deviation from plane is 0.0023 angstrom

Weight scheme: Sigma Weights

Chi-squared: 2.031

----- Plane number 3 -----

| Atoms Defining Plane | Distance | esd    |
|----------------------|----------|--------|
| N3 [ 1; 0; 0; 0]     | -0.0064  | 0.0049 |
| N4 [ 1; 0; 0; 0]     | 0.0006   | 0.0049 |
| C12 [ 1; 0; 0; 0]    | 0.0045   | 0.0053 |
| C14 [ 1; 0; 0; 0]    | -0.0087  | 0.0064 |
| C13 [ 1; 0; 0; 0]    | 0.0123   | 0.0063 |

Least-squares plane

$$10.98669x + 11.65599y + 4.72860z = 14.01011$$

(0.02168) (0.02285) (0.03687) (0.02599)

Mean deviation from plane is 0.0065 angstrom

Weight scheme: Sigma Weights

Chi-squared: 14.606

----- Plane number 4 -----

| Atoms Defining Plane | Distance | esd    |
|----------------------|----------|--------|
| N5 [ 1; 0; 0; 0]     | 0.0026   | 0.0047 |
| N6 [ 1; 0; 0; 0]     | 0.0010   | 0.0047 |
| C24 [ 1; 0; 0; 0]    | -0.0037  | 0.0061 |
| C23 [ 1; 0; 0; 0]    | -0.0028  | 0.0051 |
| C25 [ 1; 0; 0; 0]    | 0.0012   | 0.0062 |

Least-squares plane

$$3.10271x + 8.32522y - 10.62092z = 2.92936$$

(0.03247) (0.02954) (0.02747) (0.02251)

Mean deviation from plane is 0.0023 angstrom

Weight scheme: Sigma Weights

Chi-squared: 1.669

Dihedral angles between least-squares planes

-----

| plane | plane | angle   | esd   |
|-------|-------|---------|-------|
| 1     | 2     | 104.347 | 0.122 |
| 1     | 3     | 87.518  | 0.130 |
| 1     | 4     | 92.416  | 0.125 |
| 2     | 3     | 74.314  | 0.193 |
| 2     | 4     | 130.870 | 0.189 |
| 3     | 4     | 60.441  | 0.197 |

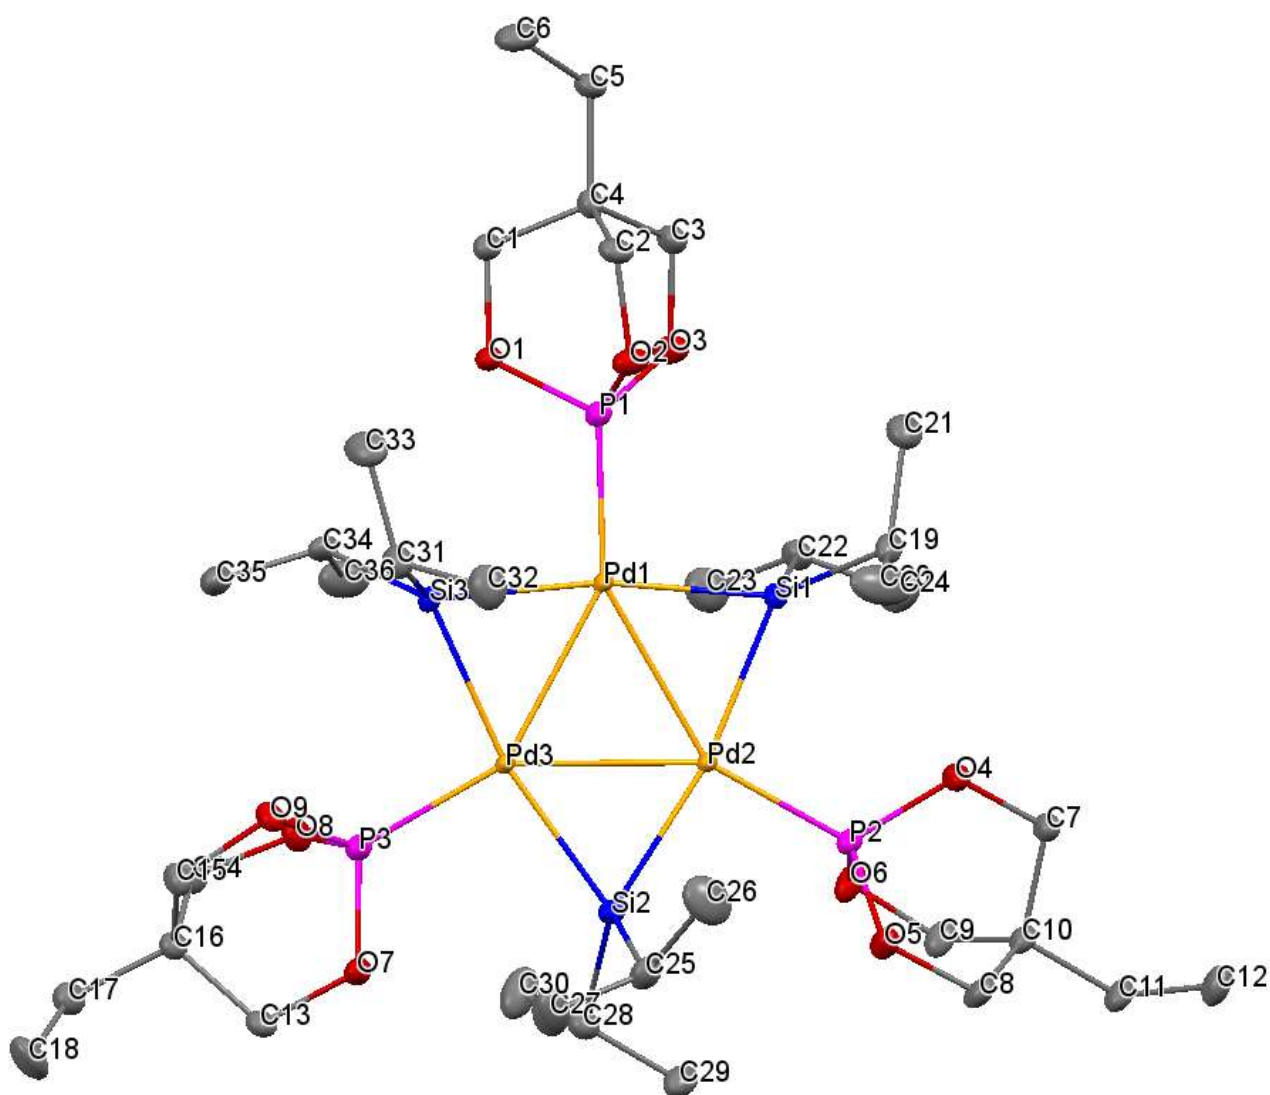

**Figure S9.** ORTEP drawing of **6** (50% probability of the thermal ellipsoids)

**Table S3-1.** Crystal data and structure refinement for **6**

|                                              |                                                                                                                                                                                             |
|----------------------------------------------|---------------------------------------------------------------------------------------------------------------------------------------------------------------------------------------------|
| Empirical Formula                            | C <sub>36</sub> H <sub>75</sub> O <sub>9</sub> P <sub>3</sub> Pd <sub>3</sub> Si <sub>3</sub>                                                                                               |
| Formula Weight                               | 1148.36                                                                                                                                                                                     |
| Crystal Color, Habit                         | yellow, block                                                                                                                                                                               |
| Crystal Dimensions                           | 0.120 X 0.120 X 0.080 mm                                                                                                                                                                    |
| Crystal System                               | triclinic                                                                                                                                                                                   |
| Lattice Type                                 | Primitive                                                                                                                                                                                   |
| Lattice Parameters                           | a = 11.2891(18) Å<br>b = 12.711(2) Å<br>c = 19.549(3) Å<br>α = 81.516(6) °<br>β = 85.854(6) °<br>γ = 64.096(5) °<br>V = 2495.6(7) Å <sup>3</sup>                                            |
| Space Group                                  | P-1 (#2)                                                                                                                                                                                    |
| Z value                                      | 2                                                                                                                                                                                           |
| D <sub>calc</sub>                            | 1.528 g/cm <sup>3</sup>                                                                                                                                                                     |
| F <sub>000</sub>                             | 1176.00                                                                                                                                                                                     |
| Diffractionmeter                             | R-Axis IV                                                                                                                                                                                   |
| Radiation                                    | synchrotron (λ = 0.71075 Å)                                                                                                                                                                 |
| Voltage, Current                             | 8kV, 100mA                                                                                                                                                                                  |
| Temperature                                  | -170.0 °C                                                                                                                                                                                   |
| Detector Aperture                            | 300.0 x 300.0 mm                                                                                                                                                                            |
| Data Images                                  | 360 exposures                                                                                                                                                                               |
| ω oscillation Range (χ=45.0, φ=0.0)          | 0.0 - 180.0 °                                                                                                                                                                               |
| Exposure Rate                                | 60.0 sec./°                                                                                                                                                                                 |
| Detector Swing Angle                         | 0.00 °                                                                                                                                                                                      |
| ω oscillation Range (χ=45.0, φ=90.0)         | 0.0 - 180.0 °                                                                                                                                                                               |
| Exposure Rate                                | 60.0 sec./°                                                                                                                                                                                 |
| Detector Swing Angle                         | 0.00 °                                                                                                                                                                                      |
| Detector Position                            | 60.00 mm                                                                                                                                                                                    |
| Pixel Size                                   | 0.068 mm                                                                                                                                                                                    |
| 2θ <sub>max</sub>                            | 55.0 °                                                                                                                                                                                      |
| No. of Reflections Measured                  | Total: 44577<br>Unique: 11457 (R <sub>int</sub> = 0.0682)                                                                                                                                   |
| Corrections                                  | Lorentz-polarization<br>Absorption<br>(trans. factors: 0.834 - 1.000)                                                                                                                       |
| Structure Solution                           | Direct Methods (SIR2011)                                                                                                                                                                    |
| Refinement                                   | Full-matrix least-squares on F <sup>2</sup>                                                                                                                                                 |
| Function Minimized                           | Σ w (F <sub>o</sub> <sup>2</sup> - F <sub>c</sub> <sup>2</sup> ) <sup>2</sup>                                                                                                               |
| Least Squares Weights                        | w = 1 / [ σ <sup>2</sup> (F <sub>o</sub> <sup>2</sup> ) + (0.0264 · P) <sup>2</sup><br>+ 4.7817 · P ]<br>where P = (Max(F <sub>o</sub> <sup>2</sup> , 0) + 2F <sub>c</sub> <sup>2</sup> )/3 |
| 2θ <sub>max</sub> cutoff                     | 55.0 °                                                                                                                                                                                      |
| Anomalous Dispersion                         | All non-hydrogen atoms                                                                                                                                                                      |
| No. Observations (All reflections)           | 11457                                                                                                                                                                                       |
| No. Variables                                | 507                                                                                                                                                                                         |
| Reflection/Parameter Ratio                   | 22.60                                                                                                                                                                                       |
| Residuals: R <sub>1</sub> (I > 2.00σ(I))     | 0.0370                                                                                                                                                                                      |
| Residuals: R (All reflections)               | 0.0523                                                                                                                                                                                      |
| Residuals: wR <sub>2</sub> (All reflections) | 0.0830                                                                                                                                                                                      |
| Goodness of Fit Indicator                    | 1.023                                                                                                                                                                                       |
| Max Shift/Error in Final Cycle               | 0.002                                                                                                                                                                                       |
| Maximum peak in Final Diff. Map              | 2.32 e <sup>-</sup> /Å <sup>3</sup>                                                                                                                                                         |
| Minimum peak in Final Diff. Map              | -0.94 e <sup>-</sup> /Å <sup>3</sup>                                                                                                                                                        |

**Table 3-2.** Atomic coordinates and B<sub>iso</sub>/B<sub>eq</sub> and occupancy

| atom | x           | y          | z           | B <sub>eq</sub> | occ |
|------|-------------|------------|-------------|-----------------|-----|
| Pd1  | 0.40545(2)  | 0.64688(2) | 0.69084(2)  | 0.756(5)        | 1   |
| Pd2  | 0.15895(2)  | 0.69365(2) | 0.73988(2)  | 0.743(5)        | 1   |
| Pd3  | 0.36775(2)  | 0.50009(2) | 0.79582(2)  | 0.751(5)        | 1   |
| P1   | 0.54080(9)  | 0.68852(8) | 0.61862(5)  | 1.108(14)       | 1   |
| P2   | -0.05105(8) | 0.81329(8) | 0.73782(5)  | 1.044(14)       | 1   |
| P3   | 0.45177(9)  | 0.36352(8) | 0.88396(5)  | 1.101(14)       | 1   |
| Si1  | 0.21440(9)  | 0.81733(9) | 0.65383(5)  | 1.053(16)       | 1   |
| Si2  | 0.14509(9)  | 0.54421(9) | 0.82409(5)  | 1.104(16)       | 1   |
| Si3  | 0.57365(9)  | 0.46996(9) | 0.74286(5)  | 1.036(15)       | 1   |
| O1   | 0.6915(2)   | 0.6411(2)  | 0.64241(13) | 1.33(4)         | 1   |
| O2   | 0.5605(3)   | 0.6379(3)  | 0.54612(14) | 1.50(4)         | 1   |
| O3   | 0.5085(3)   | 0.8257(2)  | 0.59212(15) | 1.76(5)         | 1   |
| O4   | -0.1091(3)  | 0.9077(2)  | 0.66961(14) | 1.69(5)         | 1   |
| O5   | -0.1583(2)  | 0.7601(2)  | 0.74748(14) | 1.48(4)         | 1   |
| O6   | -0.0964(2)  | 0.8994(3)  | 0.79694(14) | 1.64(5)         | 1   |
| O7   | 0.3583(2)   | 0.3185(2)  | 0.93423(14) | 1.44(4)         | 1   |
| O8   | 0.5123(3)   | 0.4095(2)  | 0.93893(14) | 1.36(4)         | 1   |
| O9   | 0.5739(3)   | 0.2381(2)  | 0.87387(13) | 1.32(4)         | 1   |
| C1   | 0.7797(4)   | 0.6711(4)  | 0.59428(19) | 1.38(6)         | 1   |
| C2   | 0.6621(4)   | 0.6495(4)  | 0.49974(19) | 1.45(6)         | 1   |
| C3   | 0.5939(4)   | 0.8441(3)  | 0.5380(2)   | 1.55(6)         | 1   |
| C4   | 0.7123(4)   | 0.7306(3)  | 0.52554(19) | 1.27(6)         | 1   |
| C5   | 0.8041(4)   | 0.7601(4)  | 0.4727(2)   | 1.55(6)         | 1   |
| C6   | 0.9242(4)   | 0.6549(4)  | 0.4510(2)   | 2.10(7)         | 1   |
| C7   | -0.2436(3)  | 0.9953(3)  | 0.6731(2)   | 1.48(6)         | 1   |
| C8   | -0.2963(3)  | 0.8453(3)  | 0.7471(2)   | 1.53(6)         | 1   |
| C9   | -0.2350(4)  | 0.9783(4)  | 0.8002(2)   | 1.54(6)         | 1   |
| C10  | -0.3095(3)  | 0.9705(3)  | 0.74075(19) | 1.12(6)         | 1   |
| C11  | -0.4549(3)  | 1.0611(4)  | 0.7450(2)   | 1.57(6)         | 1   |
| C12  | -0.5381(4)  | 1.0818(4)  | 0.6817(2)   | 1.95(7)         | 1   |
| C13  | 0.4129(4)   | 0.2527(4)  | 1.00084(19) | 1.41(6)         | 1   |
| C14  | 0.5859(4)   | 0.3230(3)  | 0.99585(19) | 1.38(6)         | 1   |
| C15  | 0.6194(4)   | 0.1545(3)  | 0.93636(19) | 1.33(6)         | 1   |
| C16  | 0.5612(3)   | 0.2135(3)  | 1.00067(18) | 1.11(6)         | 1   |
| C17  | 0.6244(4)   | 0.1330(4)  | 1.0669(2)   | 1.66(6)         | 1   |
| C18  | 0.6292(5)   | 0.0098(4)  | 1.0746(2)   | 2.59(8)         | 1   |
| C19  | 0.1456(4)   | 0.8493(4)  | 0.5636(2)   | 1.69(7)         | 1   |
| C20  | 0.1380(6)   | 0.7407(5)  | 0.5436(3)   | 3.59(11)        | 1   |
| C21  | 0.2196(4)   | 0.8953(4)  | 0.5081(2)   | 2.24(8)         | 1   |
| C22  | 0.2087(4)   | 0.9598(3)  | 0.6767(2)   | 1.40(6)         | 1   |
| C23  | 0.2660(5)   | 0.9378(4)  | 0.7486(2)   | 2.50(8)         | 1   |
| C24  | 0.0722(4)   | 1.0643(4)  | 0.6716(3)   | 2.42(8)         | 1   |
| C25  | 0.0777(4)   | 0.4464(4)  | 0.7933(2)   | 1.56(6)         | 1   |
| C26  | 0.0796(5)   | 0.4546(5)  | 0.7148(2)   | 2.94(9)         | 1   |
| C27  | 0.1496(5)   | 0.3177(4)  | 0.8248(3)   | 2.50(8)         | 1   |
| C28  | 0.0763(4)   | 0.5662(4)  | 0.9153(2)   | 1.53(6)         | 1   |
| C29  | -0.0695(4)  | 0.6516(4)  | 0.9170(2)   | 2.06(7)         | 1   |
| C30  | 0.1554(4)   | 0.6037(5)  | 0.9575(3)   | 2.74(9)         | 1   |
| C31  | 0.6505(4)   | 0.3420(3)  | 0.6899(2)   | 1.48(6)         | 1   |
| C32  | 0.5484(4)   | 0.3421(4)  | 0.6428(2)   | 2.09(7)         | 1   |
| C33  | 0.7707(4)   | 0.3393(4)  | 0.6474(2)   | 2.14(7)         | 1   |
| C34  | 0.7111(4)   | 0.4759(4)  | 0.7900(2)   | 1.50(6)         | 1   |
| C35  | 0.7984(4)   | 0.3591(4)  | 0.8312(2)   | 2.33(8)         | 1   |
| C36  | 0.6540(5)   | 0.5749(5)  | 0.8351(2)   | 2.60(8)         | 1   |
| C37  | 0.0086(8)   | 1.0611(8)  | 0.8851(5)   | 1.93(14)        | 1/2 |
| C38  | 0.0010(11)  | 0.9498(11) | 0.9343(6)   | 3.7(2)          | 1/2 |
| C39  | -0.0002(11) | 1.0246(10) | 0.9459(6)   | 3.29(19)        | 1/2 |
| C40  | -0.0105(8)  | 0.9183(7)  | 0.9846(4)   | 1.64(13)        | 1/2 |

C41                    -0.0206(11)            0.8874(11)            1.0397(6)            3.9(2)            1/2

$$B_{eq} = 8/3 \pi^2 (U_{11}(aa^*)^2 + U_{22}(bb^*)^2 + U_{33}(cc^*)^2 + 2U_{12}(aa^*bb^*)\cos \gamma + 2U_{13}(aa^*cc^*)\cos \beta + 2U_{23}(bb^*cc^*)\cos \alpha)$$

**Table 3-3.** Anisotropic displacement parameters

| atom | U <sub>11</sub> | U <sub>22</sub> | U <sub>33</sub> | U <sub>12</sub> | U <sub>13</sub> | U <sub>23</sub> |
|------|-----------------|-----------------|-----------------|-----------------|-----------------|-----------------|
| Pd1  | 0.00651(11)     | 0.00985(13)     | 0.01099(13)     | -0.00282(10)    | 0.00090(9)      | 0.00000(10)     |
| Pd2  | 0.00667(11)     | 0.01099(13)     | 0.00944(13)     | -0.00339(10)    | 0.00021(9)      | 0.00049(10)     |
| Pd3  | 0.00642(11)     | 0.01122(13)     | 0.01048(13)     | -0.00403(10)    | -0.00063(9)     | 0.00084(10)     |
| P1   | 0.0113(4)       | 0.0145(5)       | 0.0154(5)       | -0.0052(4)      | 0.0009(3)       | -0.0007(4)      |
| P2   | 0.0103(4)       | 0.0158(5)       | 0.0129(4)       | -0.0052(4)      | 0.0008(3)       | -0.0020(4)      |
| P3   | 0.0119(4)       | 0.0158(5)       | 0.0145(5)       | -0.0066(4)      | -0.0005(3)      | -0.0012(4)      |
| Si1  | 0.0118(4)       | 0.0156(5)       | 0.0105(5)       | -0.0046(4)      | -0.0005(4)      | 0.0004(4)       |
| Si2  | 0.0118(4)       | 0.0190(5)       | 0.0124(5)       | -0.0082(4)      | 0.0000(4)       | -0.0005(4)      |
| Si3  | 0.0090(4)       | 0.0149(5)       | 0.0142(5)       | -0.0041(4)      | -0.0009(4)      | -0.0008(4)      |
| O1   | 0.0125(12)      | 0.0240(14)      | 0.0134(13)      | -0.0087(11)     | 0.0000(10)      | 0.0022(11)      |
| O2   | 0.0188(13)      | 0.0281(15)      | 0.0164(14)      | -0.0154(12)     | 0.0031(10)      | -0.0061(11)     |
| O3   | 0.0182(13)      | 0.0142(13)      | 0.0299(16)      | -0.0050(11)     | 0.0075(11)      | -0.0002(12)     |
| O4   | 0.0134(12)      | 0.0234(15)      | 0.0184(14)      | -0.0026(11)     | 0.0027(10)      | 0.0046(11)      |
| O5   | 0.0137(12)      | 0.0149(13)      | 0.0266(15)      | -0.0059(11)     | -0.0017(11)     | 0.0000(11)      |
| O6   | 0.0129(12)      | 0.0262(15)      | 0.0214(14)      | -0.0039(11)     | -0.0027(10)     | -0.0111(12)     |
| O7   | 0.0130(12)      | 0.0256(15)      | 0.0164(14)      | -0.0100(11)     | -0.0028(10)     | 0.0025(11)      |
| O8   | 0.0212(13)      | 0.0155(13)      | 0.0166(13)      | -0.0090(11)     | -0.0043(10)     | -0.0012(10)     |
| O9   | 0.0190(13)      | 0.0164(13)      | 0.0117(13)      | -0.0052(11)     | 0.0013(10)      | -0.0009(10)     |
| C1   | 0.0139(16)      | 0.025(2)        | 0.0137(18)      | -0.0088(15)     | -0.0005(14)     | 0.0004(15)      |
| C2   | 0.0212(18)      | 0.024(2)        | 0.0124(18)      | -0.0129(16)     | 0.0038(14)      | -0.0017(15)     |
| C3   | 0.0179(18)      | 0.0178(19)      | 0.020(2)        | -0.0066(15)     | 0.0007(15)      | 0.0034(15)      |
| C4   | 0.0151(16)      | 0.0167(18)      | 0.0145(18)      | -0.0057(14)     | -0.0013(14)     | 0.0005(14)      |
| C5   | 0.0185(18)      | 0.024(2)        | 0.0160(19)      | -0.0108(16)     | 0.0018(14)      | 0.0030(15)      |
| C6   | 0.026(2)        | 0.035(2)        | 0.023(2)        | -0.0177(19)     | 0.0110(17)      | -0.0090(18)     |
| C7   | 0.0135(17)      | 0.0189(19)      | 0.0187(19)      | -0.0038(15)     | 0.0010(14)      | 0.0020(15)      |
| C8   | 0.0105(16)      | 0.0185(19)      | 0.028(2)        | -0.0053(15)     | 0.0019(14)      | -0.0023(16)     |
| C9   | 0.0145(17)      | 0.022(2)        | 0.020(2)        | -0.0040(15)     | 0.0002(14)      | -0.0098(16)     |
| C10  | 0.0101(15)      | 0.0141(17)      | 0.0163(18)      | -0.0029(14)     | 0.0017(13)      | -0.0042(14)     |
| C11  | 0.0111(16)      | 0.024(2)        | 0.021(2)        | -0.0033(15)     | 0.0009(14)      | -0.0033(16)     |
| C12  | 0.0151(18)      | 0.020(2)        | 0.035(2)        | -0.0035(16)     | -0.0051(16)     | -0.0033(18)     |
| C13  | 0.0189(18)      | 0.024(2)        | 0.0110(17)      | -0.0103(16)     | 0.0007(14)      | 0.0006(15)      |
| C14  | 0.0213(18)      | 0.0187(19)      | 0.0153(18)      | -0.0101(16)     | -0.0046(14)     | -0.0035(15)     |
| C15  | 0.0180(17)      | 0.0124(17)      | 0.0149(18)      | -0.0021(14)     | -0.0007(14)     | -0.0009(14)     |
| C16  | 0.0158(16)      | 0.0170(18)      | 0.0110(17)      | -0.0082(14)     | -0.0008(13)     | -0.0021(14)     |
| C17  | 0.0215(19)      | 0.025(2)        | 0.0173(19)      | -0.0112(17)     | -0.0025(15)     | -0.0010(16)     |
| C18  | 0.045(3)        | 0.028(2)        | 0.028(2)        | -0.021(2)       | -0.011(2)       | 0.0118(19)      |
| C19  | 0.0143(17)      | 0.034(2)        | 0.0122(18)      | -0.0076(16)     | -0.0019(14)     | 0.0010(16)      |
| C20  | 0.067(4)        | 0.081(4)        | 0.019(2)        | -0.059(3)       | 0.001(2)        | -0.011(2)       |
| C21  | 0.026(2)        | 0.038(3)        | 0.017(2)        | -0.012(2)       | 0.0010(17)      | 0.0016(18)      |
| C22  | 0.0197(18)      | 0.0131(18)      | 0.020(2)        | -0.0077(15)     | 0.0000(15)      | 0.0008(15)      |
| C23  | 0.042(3)        | 0.031(2)        | 0.027(2)        | -0.020(2)       | -0.004(2)       | -0.0074(19)     |
| C24  | 0.025(2)        | 0.018(2)        | 0.045(3)        | -0.0059(18)     | 0.0025(19)      | -0.0066(19)     |
| C25  | 0.0158(17)      | 0.023(2)        | 0.024(2)        | -0.0107(16)     | -0.0027(15)     | -0.0028(16)     |
| C26  | 0.056(3)        | 0.045(3)        | 0.024(2)        | -0.032(3)       | -0.010(2)       | -0.006(2)       |
| C27  | 0.035(2)        | 0.023(2)        | 0.043(3)        | -0.018(2)       | -0.014(2)       | 0.002(2)        |
| C28  | 0.0207(18)      | 0.023(2)        | 0.0143(18)      | -0.0105(16)     | 0.0001(14)      | -0.0004(15)     |
| C29  | 0.0177(18)      | 0.041(3)        | 0.017(2)        | -0.0112(18)     | 0.0016(15)      | -0.0027(18)     |
| C30  | 0.024(2)        | 0.045(3)        | 0.031(3)        | -0.006(2)       | -0.0050(18)     | -0.018(2)       |
| C31  | 0.0191(18)      | 0.0150(18)      | 0.0185(19)      | -0.0041(15)     | 0.0008(15)      | -0.0022(15)     |
| C32  | 0.034(2)        | 0.021(2)        | 0.027(2)        | -0.0115(18)     | -0.0053(18)     | -0.0073(17)     |
| C33  | 0.029(2)        | 0.021(2)        | 0.026(2)        | -0.0064(18)     | 0.0120(18)      | -0.0090(17)     |
| C34  | 0.0146(17)      | 0.031(2)        | 0.0157(19)      | -0.0144(16)     | -0.0015(14)     | 0.0010(16)      |
| C35  | 0.0166(18)      | 0.047(3)        | 0.023(2)        | -0.0158(19)     | -0.0039(16)     | 0.009(2)        |
| C36  | 0.042(3)        | 0.046(3)        | 0.027(2)        | -0.033(2)       | 0.003(2)        | -0.012(2)       |

The general temperature factor expression:  $\exp(-2\pi^2(a^2U_{11}h^2 + b^2U_{22}k^2 + c^2U_{33}l^2 + 2a*b*U_{12}hk + 2a*c*U_{13}hl + 2b*c*U_{23}kl))$

**Table 3-4.** Bond lengths (Å)

| atom | atom             | distance   | atom | atom             | distance   |
|------|------------------|------------|------|------------------|------------|
| Pd1  | Pd2              | 2.7117(5)  | Pd1  | Pd3              | 2.7041(6)  |
| Pd1  | P1               | 2.1869(11) | Pd1  | Si1              | 2.3557(9)  |
| Pd1  | Si3              | 2.3602(9)  | Pd2  | Pd3              | 2.7050(4)  |
| Pd2  | P2               | 2.1864(8)  | Pd2  | Si1              | 2.3707(12) |
| Pd2  | Si2              | 2.3754(11) | Pd3  | P3               | 2.1902(10) |
| Pd3  | Si2              | 2.3658(11) | Pd3  | Si3              | 2.3691(11) |
| P1   | O1               | 1.615(3)   | P1   | O2               | 1.604(3)   |
| P1   | O3               | 1.627(3)   | P2   | O4               | 1.617(3)   |
| P2   | O5               | 1.613(3)   | P2   | O6               | 1.610(3)   |
| P3   | O7               | 1.618(3)   | P3   | O8               | 1.614(4)   |
| P3   | O9               | 1.617(2)   | Si1  | C19              | 1.895(4)   |
| Si1  | C22              | 1.902(5)   | Si2  | C25              | 1.898(5)   |
| Si2  | C28              | 1.903(4)   | Si3  | C31              | 1.899(4)   |
| Si3  | C34              | 1.895(5)   | O1   | C1               | 1.454(5)   |
| O2   | C2               | 1.455(5)   | O3   | C3               | 1.442(5)   |
| O4   | C7               | 1.442(4)   | O5   | C8               | 1.458(4)   |
| O6   | C9               | 1.446(4)   | O7   | C13              | 1.456(4)   |
| O8   | C14              | 1.453(4)   | O9   | C15              | 1.455(4)   |
| C1   | C4               | 1.517(5)   | C2   | C4               | 1.530(7)   |
| C3   | C4               | 1.516(5)   | C4   | C5               | 1.535(6)   |
| C5   | C6               | 1.518(5)   | C7   | C10              | 1.530(5)   |
| C8   | C10              | 1.519(6)   | C9   | C10              | 1.522(6)   |
| C10  | C11              | 1.544(4)   | C11  | C12              | 1.528(6)   |
| C13  | C16              | 1.523(5)   | C14  | C16              | 1.522(7)   |
| C15  | C16              | 1.518(5)   | C16  | C17              | 1.530(5)   |
| C17  | C18              | 1.527(7)   | C19  | C20              | 1.528(9)   |
| C19  | C21              | 1.525(7)   | C22  | C23              | 1.525(6)   |
| C22  | C24              | 1.531(5)   | C25  | C26              | 1.521(6)   |
| C25  | C27              | 1.525(5)   | C28  | C29              | 1.527(5)   |
| C28  | C30              | 1.517(8)   | C31  | C32              | 1.526(7)   |
| C31  | C33              | 1.529(6)   | C34  | C35              | 1.519(5)   |
| C34  | C36              | 1.522(7)   | C37  | C38              | 1.620(16)  |
| C37  | C39              | 1.224(14)  | C37  | C41 <sup>1</sup> | 1.731(17)  |
| C38  | C39              | 1.00(2)    | C38  | C40              | 1.026(15)  |
| C39  | C40              | 1.495(16)  | C39  | C40 <sup>1</sup> | 1.668(16)  |
| C39  | C41 <sup>1</sup> | 1.31(2)    | C40  | C41              | 1.108(15)  |

Symmetry Operators:

(1) -X,-Y+2,-Z+2

**Table 3-5.** Bond angles (°)

| atom | atom | atom | angle      | atom | atom | atom | angle     |
|------|------|------|------------|------|------|------|-----------|
| Pd2  | Pd1  | Pd3  | 59.929(11) | Pd2  | Pd1  | P1   | 151.20(2) |
| Pd2  | Pd1  | Si1  | 55.25(3)   | Pd2  | Pd1  | Si3  | 115.16(3) |
| Pd3  | Pd1  | P1   | 148.84(2)  | Pd3  | Pd1  | Si1  | 115.05(3) |
| Pd3  | Pd1  | Si3  | 55.28(3)   | P1   | Pd1  | Si1  | 96.10(4)  |
| P1   | Pd1  | Si3  | 93.56(4)   | Si1  | Pd1  | Si3  | 170.27(4) |
| Pd1  | Pd2  | Pd3  | 59.895(13) | Pd1  | Pd2  | P2   | 148.47(3) |
| Pd1  | Pd2  | Si1  | 54.73(2)   | Pd1  | Pd2  | Si2  | 114.65(2) |
| Pd3  | Pd2  | P2   | 151.43(3)  | Pd3  | Pd2  | Si1  | 114.49(3) |
| Pd3  | Pd2  | Si2  | 55.05(2)   | P2   | Pd2  | Si1  | 93.74(4)  |
| P2   | Pd2  | Si2  | 96.88(4)   | Si1  | Pd2  | Si2  | 169.31(3) |

|                  |     |                  |            |     |     |                  |            |
|------------------|-----|------------------|------------|-----|-----|------------------|------------|
| Pd1              | Pd3 | Pd2              | 60.175(14) | Pd1 | Pd3 | P3               | 147.75(3)  |
| Pd1              | Pd3 | Si2              | 115.26(3)  | Pd1 | Pd3 | Si3              | 54.97(2)   |
| Pd2              | Pd3 | P3               | 148.42(3)  | Pd2 | Pd3 | Si2              | 55.38(3)   |
| Pd2              | Pd3 | Si3              | 115.09(3)  | P3  | Pd3 | Si2              | 95.99(4)   |
| P3               | Pd3 | Si3              | 94.97(4)   | Si2 | Pd3 | Si3              | 167.66(4)  |
| Pd1              | P1  | O1               | 117.91(10) | Pd1 | P1  | O2               | 114.72(14) |
| Pd1              | P1  | O3               | 119.53(10) | O1  | P1  | O2               | 101.45(14) |
| O1               | P1  | O3               | 99.44(16)  | O2  | P1  | O3               | 100.69(16) |
| Pd2              | P2  | O4               | 118.35(10) | Pd2 | P2  | O5               | 119.70(9)  |
| Pd2              | P2  | O6               | 113.69(11) | O4  | P2  | O5               | 99.63(16)  |
| O4               | P2  | O6               | 100.84(14) | O5  | P2  | O6               | 101.58(16) |
| Pd3              | P3  | O7               | 120.31(10) | Pd3 | P3  | O8               | 110.55(11) |
| Pd3              | P3  | O9               | 121.17(10) | O7  | P3  | O8               | 100.59(16) |
| O7               | P3  | O9               | 99.83(15)  | O8  | P3  | O9               | 101.01(15) |
| Pd1              | Si1 | Pd2              | 70.02(3)   | Pd1 | Si1 | C19              | 122.87(12) |
| Pd1              | Si1 | C22              | 114.45(12) | Pd2 | Si1 | C19              | 119.37(17) |
| Pd2              | Si1 | C22              | 119.00(13) | C19 | Si1 | C22              | 107.62(19) |
| Pd2              | Si2 | Pd3              | 69.57(3)   | Pd2 | Si2 | C25              | 116.17(13) |
| Pd2              | Si2 | C28              | 125.24(15) | Pd3 | Si2 | C25              | 116.29(11) |
| Pd3              | Si2 | C28              | 122.41(14) | C25 | Si2 | C28              | 104.7(2)   |
| Pd1              | Si3 | Pd3              | 69.75(3)   | Pd1 | Si3 | C31              | 117.54(12) |
| Pd1              | Si3 | C34              | 119.44(14) | Pd3 | Si3 | C31              | 116.16(15) |
| Pd3              | Si3 | C34              | 122.57(12) | C31 | Si3 | C34              | 107.71(17) |
| P1               | O1  | C1               | 117.3(2)   | P1  | O2  | C2               | 117.0(3)   |
| P1               | O3  | C3               | 115.3(2)   | P2  | O4  | C7               | 117.1(2)   |
| P2               | O5  | C8               | 116.6(3)   | P2  | O6  | C9               | 116.8(3)   |
| P3               | O7  | C13              | 116.5(3)   | P3  | O8  | C14              | 116.4(3)   |
| P3               | O9  | C15              | 115.7(2)   | O1  | C1  | C4               | 110.4(3)   |
| O2               | C2  | C4               | 110.4(3)   | O3  | C3  | C4               | 112.5(3)   |
| C1               | C4  | C2               | 108.0(3)   | C1  | C4  | C3               | 108.2(3)   |
| C1               | C4  | C5               | 111.9(3)   | C2  | C4  | C3               | 107.9(3)   |
| C2               | C4  | C5               | 112.0(3)   | C3  | C4  | C5               | 108.8(3)   |
| C4               | C5  | C6               | 115.5(4)   | O4  | C7  | C10              | 110.7(3)   |
| O5               | C8  | C10              | 111.0(3)   | O6  | C9  | C10              | 111.2(3)   |
| C7               | C10 | C8               | 108.6(3)   | C7  | C10 | C9               | 107.9(4)   |
| C7               | C10 | C11              | 111.8(3)   | C8  | C10 | C9               | 108.1(3)   |
| C8               | C10 | C11              | 111.6(4)   | C9  | C10 | C11              | 108.7(3)   |
| C10              | C11 | C12              | 115.5(3)   | O7  | C13 | C16              | 110.1(3)   |
| O8               | C14 | C16              | 110.4(3)   | O9  | C15 | C16              | 111.3(3)   |
| C13              | C16 | C14              | 108.2(3)   | C13 | C16 | C15              | 108.3(3)   |
| C13              | C16 | C17              | 111.6(3)   | C14 | C16 | C15              | 108.0(3)   |
| C14              | C16 | C17              | 108.5(4)   | C15 | C16 | C17              | 112.1(3)   |
| C16              | C17 | C18              | 115.7(4)   | Si1 | C19 | C20              | 110.6(3)   |
| Si1              | C19 | C21              | 114.3(3)   | C20 | C19 | C21              | 110.3(4)   |
| Si1              | C22 | C23              | 109.6(3)   | Si1 | C22 | C24              | 114.7(3)   |
| C23              | C22 | C24              | 110.8(3)   | Si2 | C25 | C26              | 112.1(4)   |
| Si2              | C25 | C27              | 112.5(3)   | C26 | C25 | C27              | 109.8(4)   |
| Si2              | C28 | C29              | 113.2(3)   | Si2 | C28 | C30              | 112.1(3)   |
| C29              | C28 | C30              | 110.4(4)   | Si3 | C31 | C32              | 110.6(2)   |
| Si3              | C31 | C33              | 113.7(3)   | C32 | C31 | C33              | 110.0(3)   |
| Si3              | C34 | C35              | 113.5(4)   | Si3 | C34 | C36              | 109.8(3)   |
| C35              | C34 | C36              | 111.6(4)   | C38 | C37 | C39              | 38.2(9)    |
| C38              | C37 | C41 <sup>1</sup> | 86.8(8)    | C39 | C37 | C41 <sup>1</sup> | 49.1(9)    |
| C37              | C38 | C39              | 49.0(9)    | C37 | C38 | C40              | 143.8(14)  |
| C39              | C38 | C40              | 94.9(14)   | C37 | C39 | C38              | 92.9(12)   |
| C37              | C39 | C40              | 136.0(12)  | C37 | C39 | C40 <sup>1</sup> | 127.6(12)  |
| C37              | C39 | C41 <sup>1</sup> | 86.1(11)   | C38 | C39 | C40              | 43.2(9)    |
| C38              | C39 | C40 <sup>1</sup> | 138.7(12)  | C38 | C39 | C41 <sup>1</sup> | 170.0(13)  |
| C40              | C39 | C40 <sup>1</sup> | 96.2(8)    | C40 | C39 | C41 <sup>1</sup> | 137.4(11)  |
| C40 <sup>1</sup> | C39 | C41 <sup>1</sup> | 41.5(7)    | C38 | C40 | C39              | 41.9(10)   |

|                  |     |                  |           |                  |     |                  |           |
|------------------|-----|------------------|-----------|------------------|-----|------------------|-----------|
| C38              | C40 | C39 <sup>1</sup> | 125.2(13) | C38              | C40 | C41              | 176.8(17) |
| C39              | C40 | C39 <sup>1</sup> | 83.8(8)   | C39              | C40 | C41              | 135.1(12) |
| C39 <sup>1</sup> | C40 | C41              | 51.7(10)  | C37 <sup>1</sup> | C41 | C39 <sup>1</sup> | 44.8(7)   |
| C37 <sup>1</sup> | C41 | C40              | 131.6(13) | C39 <sup>1</sup> | C41 | C40              | 86.8(12)  |

Symmetry Operators:

(1) -X,-Y+2,-Z+2

**Table 3-6.** Torsion Angles(°)

(Those having bond angles > 160 or < 20 degrees are excluded.)

| atom1 | atom2 | atom3 | atom4 | angle        | atom1 | atom2 | atom3 | atom4 | angle       |
|-------|-------|-------|-------|--------------|-------|-------|-------|-------|-------------|
| Pd2   | Pd1   | Pd3   | Pd2   | 0.0          | Pd2   | Pd1   | Pd3   | P3    | -158.68(3)  |
| Pd2   | Pd1   | Pd3   | Si2   | 5.942(15)    | Pd2   | Pd1   | Pd3   | Si3   | 177.205(17) |
| Pd3   | Pd1   | Pd2   | Pd3   | 0.0          | Pd3   | Pd1   | Pd2   | P2    | 174.99(4)   |
| Pd3   | Pd1   | Pd2   | Si1   | 175.596(17)  | Pd3   | Pd1   | Pd2   | Si2   | -5.888(15)  |
| Pd2   | Pd1   | P1    | O1    | 155.35(4)    | Pd2   | Pd1   | P1    | O2    | -85.24(8)   |
| Pd2   | Pd1   | P1    | O3    | 34.46(12)    | P1    | Pd1   | Pd2   | Pd3   | 177.84(7)   |
| P1    | Pd1   | Pd2   | P2    | -7.17(9)     | P1    | Pd1   | Pd2   | Si1   | -6.57(7)    |
| P1    | Pd1   | Pd2   | Si2   | 171.95(7)    | Pd2   | Pd1   | Si1   | Pd2   | 0.0         |
| Pd2   | Pd1   | Si1   | C19   | -112.73(8)   | Pd2   | Pd1   | Si1   | C22   | 113.67(5)   |
| Si1   | Pd1   | Pd2   | Pd3   | -175.60(4)   | Si1   | Pd1   | Pd2   | P2    | -0.60(5)    |
| Si1   | Pd1   | Pd2   | Si1   | -0.00(4)     | Si1   | Pd1   | Pd2   | Si2   | 178.52(4)   |
| Pd2   | Pd1   | Si3   | Pd3   | -2.67(4)     | Pd2   | Pd1   | Si3   | C31   | 107.06(5)   |
| Pd2   | Pd1   | Si3   | C34   | -119.46(5)   | Si3   | Pd1   | Pd2   | Pd3   | 2.54(3)     |
| Si3   | Pd1   | Pd2   | P2    | 177.53(4)    | Si3   | Pd1   | Pd2   | Si1   | 178.13(4)   |
| Si3   | Pd1   | Pd2   | Si2   | -3.35(4)     | Pd3   | Pd1   | P1    | O1    | -28.27(11)  |
| Pd3   | Pd1   | P1    | O2    | 91.14(7)     | Pd3   | Pd1   | P1    | O3    | -149.16(4)  |
| P1    | Pd1   | Pd3   | Pd2   | -177.99(7)   | P1    | Pd1   | Pd3   | P3    | 23.33(8)    |
| P1    | Pd1   | Pd3   | Si2   | -172.04(6)   | P1    | Pd1   | Pd3   | Si3   | -0.78(7)    |
| Pd3   | Pd1   | Si1   | Pd2   | -4.21(4)     | Pd3   | Pd1   | Si1   | C19   | -116.94(6)  |
| Pd3   | Pd1   | Si1   | C22   | 109.46(5)    | Si1   | Pd1   | Pd3   | Pd2   | 3.99(3)     |
| Si1   | Pd1   | Pd3   | P3    | -154.69(4)   | Si1   | Pd1   | Pd3   | Si2   | 9.94(4)     |
| Si1   | Pd1   | Pd3   | Si3   | -178.80(4)   | Pd3   | Pd1   | Si3   | Pd3   | 0.0         |
| Pd3   | Pd1   | Si3   | C31   | 109.73(7)    | Pd3   | Pd1   | Si3   | C34   | -116.78(6)  |
| Si3   | Pd1   | Pd3   | Pd2   | -177.21(4)   | Si3   | Pd1   | Pd3   | P3    | 24.11(5)    |
| Si3   | Pd1   | Pd3   | Si2   | -171.26(4)   | Si3   | Pd1   | Pd3   | Si3   | 0.00(4)     |
| P1    | Pd1   | Si1   | Pd2   | 176.82(4)    | P1    | Pd1   | Si1   | C19   | 64.10(7)    |
| P1    | Pd1   | Si1   | C22   | -69.51(6)    | Si1   | Pd1   | P1    | O1    | 149.93(6)   |
| Si1   | Pd1   | P1    | O2    | -90.66(5)    | Si1   | Pd1   | P1    | O3    | 29.04(7)    |
| P1    | Pd1   | Si3   | Pd3   | 179.59(4)    | P1    | Pd1   | Si3   | C31   | -70.67(7)   |
| P1    | Pd1   | Si3   | C34   | 62.81(6)     | Si3   | Pd1   | P1    | O1    | -28.91(7)   |
| Si3   | Pd1   | P1    | O2    | 90.50(5)     | Si3   | Pd1   | P1    | O3    | -149.80(7)  |
| Pd1   | Pd2   | Pd3   | Pd1   | 0.0          | Pd1   | Pd2   | Pd3   | P3    | 158.26(3)   |
| Pd1   | Pd2   | Pd3   | Si2   | -173.468(17) | Pd1   | Pd2   | Pd3   | Si3   | -2.527(15)  |
| Pd1   | Pd2   | P2    | O4    | 22.19(12)    | Pd1   | Pd2   | P2    | O5    | 143.96(4)   |
| Pd1   | Pd2   | P2    | O6    | -95.86(7)    | Pd1   | Pd2   | Si1   | Pd1   | -0.000(14)  |
| Pd1   | Pd2   | Si1   | C19   | 117.26(6)    | Pd1   | Pd2   | Si1   | C22   | -107.57(6)  |
| Pd1   | Pd2   | Si2   | Pd3   | 6.22(4)      | Pd1   | Pd2   | Si2   | C25   | -103.88(4)  |
| Pd1   | Pd2   | Si2   | C28   | 122.14(5)    | Pd3   | Pd2   | P2    | O4    | -166.90(4)  |
| Pd3   | Pd2   | P2    | O5    | -45.13(11)   | Pd3   | Pd2   | P2    | O6    | 75.05(10)   |
| P2    | Pd2   | Pd3   | Pd1   | -174.52(7)   | P2    | Pd2   | Pd3   | P3    | -16.26(9)   |
| P2    | Pd2   | Pd3   | Si2   | 12.01(7)     | P2    | Pd2   | Pd3   | Si3   | -177.05(7)  |
| Pd3   | Pd2   | Si1   | Pd1   | 4.19(4)      | Pd3   | Pd2   | Si1   | C19   | 121.45(4)   |
| Pd3   | Pd2   | Si1   | C22   | -103.39(4)   | Si1   | Pd2   | Pd3   | Pd1   | -3.95(3)    |
| Si1   | Pd2   | Pd3   | P3    | 154.31(4)    | Si1   | Pd2   | Pd3   | Si2   | -177.42(4)  |
| Si1   | Pd2   | Pd3   | Si3   | -6.48(4)     | Pd3   | Pd2   | Si2   | Pd3   | 0.0         |
| Pd3   | Pd2   | Si2   | C25   | -110.10(5)   | Pd3   | Pd2   | Si2   | C28   | 115.93(7)   |
| Si2   | Pd2   | Pd3   | Pd1   | 173.47(4)    | Si2   | Pd2   | Pd3   | P3    | -28.27(4)   |
| Si2   | Pd2   | Pd3   | Si2   | 0.00(3)      | Si2   | Pd2   | Pd3   | Si3   | 170.94(4)   |

|     |     |     |     |             |     |     |     |     |             |
|-----|-----|-----|-----|-------------|-----|-----|-----|-----|-------------|
| P2  | Pd2 | Si1 | Pd1 | 179.68(4)   | P2  | Pd2 | Si1 | C19 | -63.05(5)   |
| P2  | Pd2 | Si1 | C22 | 72.11(6)    | Si1 | Pd2 | P2  | O4  | 21.69(7)    |
| Si1 | Pd2 | P2  | O5  | 143.47(6)   | Si1 | Pd2 | P2  | O6  | -96.35(6)   |
| P2  | Pd2 | Si2 | Pd3 | -174.25(4)  | P2  | Pd2 | Si2 | C25 | 75.65(5)    |
| P2  | Pd2 | Si2 | C28 | -58.32(7)   | Si2 | Pd2 | P2  | O4  | -157.01(7)  |
| Si2 | Pd2 | P2  | O5  | -35.23(7)   | Si2 | Pd2 | P2  | O6  | 84.95(6)    |
| Pd1 | Pd3 | P3  | O7  | 173.47(3)   | Pd1 | Pd3 | P3  | O8  | 56.96(8)    |
| Pd1 | Pd3 | P3  | O9  | -60.76(11)  | Pd1 | Pd3 | Si2 | Pd2 | -6.27(4)    |
| Pd1 | Pd3 | Si2 | C25 | 103.67(5)   | Pd1 | Pd3 | Si2 | C28 | -125.79(5)  |
| Pd1 | Pd3 | Si3 | Pd1 | 0.0         | Pd1 | Pd3 | Si3 | C31 | -111.58(5)  |
| Pd1 | Pd3 | Si3 | C34 | 112.71(7)   | Pd2 | Pd3 | P3  | O7  | 30.50(12)   |
| Pd2 | Pd3 | P3  | O8  | -86.02(8)   | Pd2 | Pd3 | P3  | O9  | 156.27(4)   |
| Pd2 | Pd3 | Si2 | Pd2 | 0.0         | Pd2 | Pd3 | Si2 | C25 | 109.93(5)   |
| Pd2 | Pd3 | Si2 | C28 | -119.53(7)  | Pd2 | Pd3 | Si3 | Pd1 | 2.68(4)     |
| Pd2 | Pd3 | Si3 | C31 | -108.90(4)  | Pd2 | Pd3 | Si3 | C34 | 115.39(5)   |
| P3  | Pd3 | Si2 | Pd2 | 165.56(4)   | P3  | Pd3 | Si2 | C25 | -84.51(5)   |
| P3  | Pd3 | Si2 | C28 | 46.03(7)    | Si2 | Pd3 | P3  | O7  | 7.43(7)     |
| Si2 | Pd3 | P3  | O8  | -109.09(5)  | Si2 | Pd3 | P3  | O9  | 133.20(7)   |
| P3  | Pd3 | Si3 | Pd1 | -167.36(4)  | P3  | Pd3 | Si3 | C31 | 81.06(5)    |
| P3  | Pd3 | Si3 | C34 | -54.65(6)   | Si3 | Pd3 | P3  | O7  | -166.90(7)  |
| Si3 | Pd3 | P3  | O8  | 76.58(5)    | Si3 | Pd3 | P3  | O9  | -41.14(8)   |
| Pd1 | P1  | O1  | C1  | -179.03(13) | Pd1 | P1  | O2  | C2  | -172.22(11) |
| Pd1 | P1  | O3  | C3  | -172.29(13) | O1  | P1  | O2  | C2  | -44.0(2)    |
| O2  | P1  | O1  | C1  | 54.8(2)     | O1  | P1  | O3  | C3  | 58.0(2)     |
| O3  | P1  | O1  | C1  | -48.2(2)    | O2  | P1  | O3  | C3  | -45.7(2)    |
| O3  | P1  | O2  | C2  | 58.06(19)   | Pd2 | P2  | O4  | C7  | -172.18(16) |
| Pd2 | P2  | O5  | C8  | 178.64(12)  | Pd2 | P2  | O6  | C9  | -177.97(15) |
| O4  | P2  | O5  | C8  | -50.7(2)    | O5  | P2  | O4  | C7  | 56.3(3)     |
| O4  | P2  | O6  | C9  | 54.3(2)     | O6  | P2  | O4  | C7  | -47.6(3)    |
| O5  | P2  | O6  | C9  | -48.0(2)    | O6  | P2  | O5  | C8  | 52.5(2)     |
| Pd3 | P3  | O7  | C13 | -163.96(12) | Pd3 | P3  | O8  | C14 | -172.62(13) |
| Pd3 | P3  | O9  | C15 | -179.22(14) | O7  | P3  | O8  | C14 | 59.19(19)   |
| O8  | P3  | O7  | C13 | -42.4(2)    | O7  | P3  | O9  | C15 | -44.5(3)    |
| O9  | P3  | O7  | C13 | 60.8(2)     | O8  | P3  | O9  | C15 | 58.4(3)     |
| O9  | P3  | O8  | C14 | -43.1(2)    | Pd1 | Si1 | C19 | C20 | 47.8(3)     |
| Pd1 | Si1 | C19 | C21 | -77.5(3)    | Pd1 | Si1 | C22 | C23 | -38.4(2)    |
| Pd1 | Si1 | C22 | C24 | -163.67(16) | Pd2 | Si1 | C19 | C20 | -36.3(2)    |
| Pd2 | Si1 | C19 | C21 | -161.53(17) | Pd2 | Si1 | C22 | C23 | 41.4(2)     |
| Pd2 | Si1 | C22 | C24 | -83.9(2)    | C19 | Si1 | C22 | C23 | -178.8(2)   |
| C19 | Si1 | C22 | C24 | 56.0(3)     | C22 | Si1 | C19 | C20 | -176.0(2)   |
| C22 | Si1 | C19 | C21 | 58.8(3)     | Pd2 | Si2 | C25 | C26 | 16.7(2)     |
| Pd2 | Si2 | C25 | C27 | 141.11(17)  | Pd2 | Si2 | C28 | C29 | 63.3(4)     |
| Pd2 | Si2 | C28 | C30 | -62.4(2)    | Pd3 | Si2 | C25 | C26 | -62.3(2)    |
| Pd3 | Si2 | C25 | C27 | 62.1(3)     | Pd3 | Si2 | C28 | C29 | 150.0(2)    |
| Pd3 | Si2 | C28 | C30 | 24.3(3)     | C25 | Si2 | C28 | C29 | -74.8(3)    |
| C25 | Si2 | C28 | C30 | 159.5(2)    | C28 | Si2 | C25 | C26 | 159.31(18)  |
| C28 | Si2 | C25 | C27 | -76.3(2)    | Pd1 | Si3 | C31 | C32 | -33.7(3)    |
| Pd1 | Si3 | C31 | C33 | 90.6(2)     | Pd1 | Si3 | C34 | C35 | 169.96(14)  |
| Pd1 | Si3 | C34 | C36 | 44.3(3)     | Pd3 | Si3 | C31 | C32 | 46.0(3)     |
| Pd3 | Si3 | C31 | C33 | 170.34(14)  | Pd3 | Si3 | C34 | C35 | 86.3(2)     |
| Pd3 | Si3 | C34 | C36 | -39.3(3)    | C31 | Si3 | C34 | C35 | -52.5(3)    |
| C31 | Si3 | C34 | C36 | -178.2(2)   | C34 | Si3 | C31 | C32 | -172.2(2)   |
| C34 | Si3 | C31 | C33 | -47.8(3)    | P1  | O1  | C1  | C4  | -7.2(4)     |
| P1  | O2  | C2  | C4  | -10.8(3)    | P1  | O3  | C3  | C4  | -10.3(4)    |
| P2  | O4  | C7  | C10 | -6.4(5)     | P2  | O5  | C8  | C10 | -2.7(4)     |
| P2  | O6  | C9  | C10 | -5.2(4)     | P3  | O7  | C13 | C16 | -14.8(4)    |
| P3  | O8  | C14 | C16 | -13.9(3)    | P3  | O9  | C15 | C16 | -12.6(4)    |
| O1  | C1  | C4  | C2  | -54.6(3)    | O1  | C1  | C4  | C3  | 62.0(4)     |
| O1  | C1  | C4  | C5  | -178.2(3)   | O2  | C2  | C4  | C1  | 65.0(3)     |
| O2  | C2  | C4  | C3  | -51.7(3)    | O2  | C2  | C4  | C5  | -171.4(2)   |

|                  |     |                  |                  |            |                  |     |                  |                  |            |
|------------------|-----|------------------|------------------|------------|------------------|-----|------------------|------------------|------------|
| O3               | C3  | C4               | C1               | -52.7(5)   | O3               | C3  | C4               | C2               | 63.9(4)    |
| O3               | C3  | C4               | C5               | -174.4(3)  | C1               | C4  | C5               | C6               | 64.1(5)    |
| C2               | C4  | C5               | C6               | -57.3(4)   | C3               | C4  | C5               | C6               | -176.5(3)  |
| O4               | C7  | C10              | C8               | -54.9(4)   | O4               | C7  | C10              | C9               | 62.1(4)    |
| O4               | C7  | C10              | C11              | -178.5(3)  | O5               | C8  | C10              | C7               | 59.9(4)    |
| O5               | C8  | C10              | C9               | -56.9(4)   | O5               | C8  | C10              | C11              | -176.4(3)  |
| O6               | C9  | C10              | C7               | -55.7(4)   | O6               | C9  | C10              | C8               | 61.7(4)    |
| O6               | C9  | C10              | C11              | -177.1(3)  | C7               | C10 | C11              | C12              | 49.9(5)    |
| C8               | C10 | C11              | C12              | -72.1(4)   | C9               | C10 | C11              | C12              | 168.9(3)   |
| O7               | C13 | C16              | C14              | 66.9(4)    | O7               | C13 | C16              | C15              | -49.9(4)   |
| O7               | C13 | C16              | C17              | -173.9(3)  | O8               | C14 | C16              | C13              | -50.9(3)   |
| O8               | C14 | C16              | C15              | 66.2(3)    | O8               | C14 | C16              | C17              | -172.1(2)  |
| O9               | C15 | C16              | C13              | 65.7(4)    | O9               | C15 | C16              | C14              | -51.3(4)   |
| O9               | C15 | C16              | C17              | -170.7(3)  | C13              | C16 | C17              | C18              | 70.5(4)    |
| C14              | C16 | C17              | C18              | -170.3(3)  | C15              | C16 | C17              | C18              | -51.2(5)   |
| C38              | C37 | C39              | C38              | -0.0(7)    | C38              | C37 | C39              | C40              | -2.4(9)    |
| C38              | C37 | C39              | C40 <sup>1</sup> | 171.1(16)  | C38              | C37 | C39              | C41 <sup>1</sup> | 170.0(12)  |
| C39              | C37 | C38              | C39              | -0.0(8)    | C39              | C37 | C38              | C40              | 4.1(16)    |
| C38              | C37 | C41 <sup>1</sup> | C39              | -6.2(5)    | C38              | C37 | C41 <sup>1</sup> | C40 <sup>1</sup> | -7.8(12)   |
| C41 <sup>1</sup> | C37 | C38              | C39              | 7.5(6)     | C41 <sup>1</sup> | C37 | C38              | C40              | 11.6(18)   |
| C39              | C37 | C41 <sup>1</sup> | C39              | 0.0(6)     | C39              | C37 | C41 <sup>1</sup> | C40 <sup>1</sup> | -1.7(11)   |
| C41 <sup>1</sup> | C37 | C39              | C38              | -170.0(11) | C41 <sup>1</sup> | C37 | C39              | C40              | -172.4(16) |
| C41 <sup>1</sup> | C37 | C39              | C40 <sup>1</sup> | 1.1(7)     | C41 <sup>1</sup> | C37 | C39              | C41 <sup>1</sup> | 0.0(5)     |
| C37              | C38 | C39              | C37              | 0.0(4)     | C37              | C38 | C39              | C40              | 177.6(9)   |
| C37              | C38 | C39              | C40 <sup>1</sup> | -169(2)    | C37              | C38 | C40              | C39              | -3.1(12)   |
| C37              | C38 | C40              | C39 <sup>1</sup> | -14(2)     | C39              | C38 | C40              | C39              | 0.0(6)     |
| C39              | C38 | C40              | C39 <sup>1</sup> | -10.6(14)  | C40              | C38 | C39              | C37              | -177.6(9)  |
| C40              | C38 | C39              | C40              | -0.0(4)    | C40              | C38 | C39              | C40 <sup>1</sup> | 13(2)      |
| C37              | C39 | C40              | C38              | 3.5(10)    | C37              | C39 | C40              | C39 <sup>1</sup> | 174.8(13)  |
| C37              | C39 | C40              | C41              | -178.4(10) | C37              | C39 | C40 <sup>1</sup> | C38 <sup>1</sup> | 177.5(9)   |
| C37              | C39 | C40 <sup>1</sup> | C39 <sup>1</sup> | -175.5(10) | C37              | C39 | C40 <sup>1</sup> | C41 <sup>1</sup> | -1.6(9)    |
| C37              | C39 | C41 <sup>1</sup> | C37              | 0.0(4)     | C37              | C39 | C41 <sup>1</sup> | C40 <sup>1</sup> | 178.7(8)   |
| C38              | C39 | C40              | C38              | -0.0(10)   | C38              | C39 | C40              | C39 <sup>1</sup> | 171.3(12)  |
| C38              | C39 | C40              | C41              | 178.2(15)  | C38              | C39 | C40 <sup>1</sup> | C38 <sup>1</sup> | -16(2)     |
| C38              | C39 | C40 <sup>1</sup> | C39 <sup>1</sup> | -9.0(18)   | C38              | C39 | C40 <sup>1</sup> | C41 <sup>1</sup> | 164.9(19)  |
| C40              | C39 | C40 <sup>1</sup> | C38 <sup>1</sup> | -7.1(10)   | C40              | C39 | C40 <sup>1</sup> | C39 <sup>1</sup> | 0.0(6)     |
| C40              | C39 | C40 <sup>1</sup> | C41 <sup>1</sup> | 173.9(8)   | C40 <sup>1</sup> | C39 | C40              | C38              | -171.3(9)  |
| C40 <sup>1</sup> | C39 | C40              | C39 <sup>1</sup> | 0.0(5)     | C40 <sup>1</sup> | C39 | C40              | C41              | 6.8(12)    |
| C40              | C39 | C41 <sup>1</sup> | C37              | 172.2(16)  | C40              | C39 | C41 <sup>1</sup> | C40 <sup>1</sup> | -9.0(15)   |
| C41 <sup>1</sup> | C39 | C40              | C38              | -165.3(17) | C41 <sup>1</sup> | C39 | C40              | C39 <sup>1</sup> | 6.0(13)    |
| C41 <sup>1</sup> | C39 | C40              | C41              | 13(2)      | C40 <sup>1</sup> | C39 | C41 <sup>1</sup> | C37              | -178.7(8)  |
| C40 <sup>1</sup> | C39 | C41 <sup>1</sup> | C40 <sup>1</sup> | -0.0(4)    | C41 <sup>1</sup> | C39 | C40 <sup>1</sup> | C38 <sup>1</sup> | 179.1(12)  |
| C41 <sup>1</sup> | C39 | C40 <sup>1</sup> | C39 <sup>1</sup> | -173.9(9)  | C41 <sup>1</sup> | C39 | C40 <sup>1</sup> | C41 <sup>1</sup> | 0.0(7)     |
| C39              | C40 | C41              | C37 <sup>1</sup> | -10(2)     | C39              | C40 | C41              | C39 <sup>1</sup> | -8.7(14)   |
| C39 <sup>1</sup> | C40 | C41              | C37 <sup>1</sup> | -1.2(8)    | C39 <sup>1</sup> | C40 | C41              | C39 <sup>1</sup> | 0.0(4)     |

Symmetry Operators:

(1) -X,-Y+2,-Z+2

**Table 3-7.** Least Squares Planes

----- Plane number 1 -----

| Atoms Defining Plane | Distance | esd    |
|----------------------|----------|--------|
| Pd1 [ 1; 0; 0; 0]    | -0.0191  | 0.0005 |
| Pd2 [ 1; 0; 0; 0]    | -0.0000  | 0.0005 |
| Pd3 [ 1; 0; 0; 0]    | 0.0366   | 0.0005 |
| Si1 [ 1; 0; 0; 0]    | 0.1009   | 0.0013 |
| Si2 [ 1; 0; 0; 0]    | -0.1722  | 0.0013 |

|     |               |         |        |
|-----|---------------|---------|--------|
| Si3 | [ 1; 0; 0; 0] | -0.0786 | 0.0013 |
|-----|---------------|---------|--------|

Least-squares plane  
 $4.70206x + 9.27045y + 15.18138z = 18.41028$   
(0.00180) (0.00153) (0.00216) (0.00057)

| Additional Atoms |               | Distance | esd    |
|------------------|---------------|----------|--------|
| P1               | [ 1; 0; 0; 0] | -0.0930  | 0.0012 |
| P2               | [ 1; 0; 0; 0] | 0.0904   | 0.0012 |
| P3               | [ 1; 0; 0; 0] | 0.5037   | 0.0012 |

Mean deviation from plane is 0.0679 angstrom  
Weight scheme: Sigma Weights  
Chi-squared: 65270.436
